# Supplementary material for: Chromatin-Remodeling Complex SWI/SNF Controls Multidrug Resistance by Transcriptionally Regulating the Drug Efflux Pump ABCB1
Source: Oxford University Press journal article supplement (doi:10.1158/0008-5472.can-16-0716), 2016-08-08
Supplement: 00085472can160716-sup-163341_1_supp_0_2b3f6v.xlsx [file 00085472can160716-sup-163341_1_supp_0_2b3f6v.xlsx]

## Sheet: All Genes
Gene symbol	Total reads	P-value (SMARCB1_Null vs. Wildtype)	FDR step up (SMARCB1_Null vs. Wildtype)	Ratio (SMARCB1_Null vs. Wildtype)	Fold change (SMARCB1_Null vs. Wildtype)	P-value (SMARCA4_Null vs. Wildtype)	FDR step up (SMARCA4_Null vs. Wildtype)	Ratio (SMARCA4_Null vs. Wildtype)	Fold change (SMARCA4_Null vs. Wildtype)	P-value (SMARCB1-SMARCA4_Null vs. Wildtype)	FDR step up (SMARCB1-SMARCA4_Null vs. Wildtype)	Ratio (SMARCB1-SMARCA4_Null vs. Wildtype)	Fold change (SMARCB1-SMARCA4_Null vs. Wildtype)
A1BG	3800.99	0.507166	0.811075	0.921094	-1.08567	0.512326	0.849284	1.08431	1.08431	0.225237	0.485664	0.865881	-1.15489
A1BG-AS1	2176.02	0.110373	0.371094	0.808772	-1.23644	0.169032	0.520905	0.83199	-1.20194	0.0956238	0.282519	0.80201	-1.24687
A1CF	32	0.184888	0.503877	0.437598	-2.2852	0.787092	0.974351	0.626723	-1.5956	0.695314	0.865753	0.429429	-2.32867
A2M	231.122	0.972869	1	1.054	1.054	0.669838	0.927004	1.43142	1.43142	0.0501209	0.180266	8.49508	8.49508
A2M-AS1	91.3634	0.496608	0.803928	1.32265	1.32265	0.948574	1	0.896976	-1.11486	0.0261205	0.11285	3.80297	3.80297
A2ML1	164	0.92722	0.997954	1.81755	1.81755	0.00159286	0.0171731	20.5125	20.5125	0.228357	0.486331	2.9562	2.9562
A4GALT	9290	0.587077	0.855374	0.80236	-1.24632	0.000190531	0.00300498	3.18919	3.18919	0.983202	0.9945	0.992233	-1.00783
A4GNT	74	0.5225	0.818142	1.91945	1.91945	0.195741	0.564868	2.32079	2.32079	0.268545	0.530761	2.07283	2.07283
AAAS	53754.2	0.736004	0.934571	1.04452	1.04452	0.749005	0.960438	0.958647	-1.04314	0.926802	0.974761	0.988041	-1.0121
AACS	22473	2.55201e-18	2.77049e-16	0.468024	-2.13664	0.0029849	0.0290045	0.789861	-1.26605	2.36413e-12	1.13787e-10	0.554008	-1.80503
AACSP1	536	0.551232	0.835446	1.95847	1.95847	0.675737	0.928984	1.70881	1.70881	0.95515	0.985922	0.935913	-1.06848
AADAT	19621.9	0.0027604	0.0240808	2.02585	2.02585	0.521802	0.854768	1.18289	1.18289	0.00138548	0.0109921	2.11483	2.11483
AAED1	10150	0.702044	0.916995	1.05297	1.05297	0.11552	0.418085	1.21622	1.21622	0.608073	0.81342	1.0672	1.0672
AAGAB	78644.6	0.203963	0.531631	1.15287	1.15287	0.230505	0.609431	1.14398	1.14398	0.0494756	0.178555	1.24148	1.24148
AAK1	45839	0.496729	0.804058	1.10793	1.10793	0.0648927	0.291638	1.30751	1.30751	0.0986949	0.288496	1.27283	1.27283
AAMDC	7426	0.0443053	0.203423	0.879421	-1.13711	1.60397e-06	4.71325e-05	1.35442	1.35442	0.000888581	0.00760567	1.23334	1.23334
AAMP	72021	0.984724	1	0.997905	-1.0021	0.276779	0.660463	0.884352	-1.13077	0.209731	0.466092	0.867203	-1.15313
AANAT	86	0.681093	0.906489	1.12473	1.12473	0.206011	0.577902	1.51903	1.51903	0.139384	0.36316	1.65757	1.65757
AAR2	36046.6	0.476038	0.791023	1.1185	1.1185	0.586945	0.889798	0.914155	-1.09391	0.834721	0.93528	1.03397	1.03397
AARD	16.0001	1	1	1	-1	0.254307	0.63637	37.9282	37.9282	0.0211137	0.0961281	521.32	521.32
AARS	150141	0.116317	0.382699	1.13846	1.13846	3.92023e-05	0.000797141	1.38425	1.38425	0.0321185	0.131303	1.19137	1.19137
AARS2	30008.4	0.595564	0.860793	1.0977	1.0977	0.693151	0.938675	1.07219	1.07219	0.786031	0.9114	1.04938	1.04938
AARSD1	18163.7	0.825944	0.967902	1.04465	1.04465	0.770695	0.968062	0.942156	-1.0614	0.957661	0.986582	1.01038	1.01038
AASDH	11633	0.831107	0.969765	0.942338	-1.06119	0.996905	1	0.998867	-1.00113	0.818249	0.927988	0.937944	-1.06616
AASDHPPT	78851	0.419546	0.754143	1.09109	1.09109	0.637525	0.911788	0.948685	-1.05409	0.477369	0.721723	1.07996	1.07996
AASS	77365	0.772896	0.948096	1.02938	1.02938	0.0201857	0.128863	0.778109	-1.28517	0.000389801	0.0037931	0.67029	-1.49189
AATF	77382	0.991221	1	0.998837	-1.00116	0.0494597	0.244064	0.802442	-1.2462	0.63423	0.828663	0.950327	-1.05227
AATK	11503	0.612871	0.869157	1.15553	1.15553	0.769701	0.967622	1.08845	1.08845	0.459762	0.707434	1.23171	1.23171
AATK-AS1	59	0.239883	0.580429	1.87345	1.87345	0.453756	0.814273	0.787378	-1.27004	0.18479	0.433388	1.95574	1.95574
ABAT	12067.1	0.0783267	0.297663	1.69105	1.69105	0.926545	1	1.03111	1.03111	0.0176643	0.0841282	1.98978	1.98978
ABCA1	7291	0.0221069	0.12255	0.237402	-4.21226	0.254586	0.636911	1.49938	1.49938	0.124012	0.336245	1.70504	1.70504
ABCA10	108.296	0.858508	0.979253	1.59871	1.59871	0.459059	0.817654	2.02095	2.02095	0.0765819	0.242582	5.82895	5.82895
ABCA11P	5711.03	2.51834e-15	2.04195e-13	1.68863	1.68863	8.84799e-07	2.79319e-05	1.38134	1.38134	6.15783e-17	4.95186e-15	1.74298	1.74298
ABCA12	79	0.0486054	0.216503	0.12139	-8.23794	0.413359	0.786012	0.171436	-5.83307	0.973642	0.990831	1.28329	1.28329
ABCA13	691	1.59763e-15	1.32848e-13	0.00872239	-114.647	5.80155e-07	1.915e-05	0.0595333	-16.7973	5.37776e-12	2.44958e-10	0.0166923	-59.9078
ABCA17P	247.012	0.0876598	0.319949	1.52846	1.52846	0.032053	0.180503	1.69094	1.69094	0.213623	0.471206	1.36988	1.36988
ABCA2	58689.2	0.42827	0.758528	0.90658	-1.10305	0.628268	0.906585	0.94238	-1.06114	0.283734	0.546802	0.874601	-1.14338
ABCA3	94226	0.0152321	0.0931922	1.27752	1.27752	0.180528	0.54081	1.14846	1.14846	0.0225759	0.100997	1.25968	1.25968
ABCA5	8728.7	0.146929	0.440968	1.8123	1.8123	0.0522191	0.253204	2.16509	2.16509	0.00432525	0.0280403	2.96306	2.96306
ABCA6	19	0.230817	0.569194	98.0827	98.0827	1	1	1	-1	0.0260611	0.112693	635.074	635.074
ABCA7	10934	2.60448e-05	0.000476536	0.868124	-1.15191	1.31354e-07	4.90782e-06	1.2046	1.2046	0.0170538	0.0820001	1.07775	1.07775
ABCA8	119.503	0.0633642	0.259183	18.0756	18.0756	0.249547	0.630709	0.0234409	-42.6604	0.0215394	0.0975211	90.334	90.334
ABCA9	65.4967	0.023427	0.12766	407.307	407.307	0.269429	0.653294	37.9282	37.9282	0.0134003	0.0683673	1922.83	1922.83
ABCB1	47680.6	1.09692e-31	2.82038e-29	5.85717	5.85717	0.0161512	0.109019	0.574171	-1.74164	0.460227	0.707553	1.15114	1.15114
ABCB10	48603	0.358087	0.70341	1.10461	1.10461	0.418494	0.787842	0.912668	-1.09569	0.713751	0.875802	0.959955	-1.04172
ABCB4	212.443	0.811762	0.963326	1.1994	1.1994	0.0119764	0.0862507	0.222006	-4.50438	0.26059	0.522116	0.489048	-2.04479
ABCB5	15	0.185071	0.503903	0.441616	-2.26441	0.604592	0.896588	0.753537	-1.32707	0.372863	0.634055	0.748793	-1.33548
ABCB6	2199	0.999607	1	0.998962	-1.00104	0.577903	0.886296	0.778261	-1.28492	0.997118	0.99947	1.0127	1.0127
ABCB7	43889.6	0.758749	0.942778	1.04595	1.04595	0.435517	0.801586	1.11878	1.11878	0.903737	0.964443	1.01799	1.01799
ABCB8	19941.1	0.580465	0.851551	0.95446	-1.04771	0.408437	0.78286	1.072	1.072	0.813491	0.925693	1.02092	1.02092
ABCB9	6541.98	0.747442	0.939036	0.934671	-1.0699	0.81348	0.982539	1.04945	1.04945	0.361872	0.623796	1.20593	1.20593
ABCC1	68444	0.229481	0.568244	0.871564	-1.14736	0.798642	0.97852	0.972033	-1.02877	0.048349	0.175676	0.793164	-1.26077
ABCC10	13279.7	0.121205	0.392845	1.06003	1.06003	2.21465e-05	0.000485161	1.17418	1.17418	1.04457e-05	0.000162775	1.18309	1.18309
ABCC11	125	0.837307	0.972312	0.966312	-1.03486	0.407299	0.781753	1.51612	1.51612	0.606666	0.812422	1.43427	1.43427
ABCC2	394	0.851126	0.977655	1.03309	1.03309	0.679646	0.931237	1.07003	1.07003	0.169092	0.410361	1.25556	1.25556
ABCC3	19	0.349011	0.693656	1.46347	1.46347	0.358039	0.741462	1.64728	1.64728	0.425061	0.678576	1.00855	1.00855
ABCC4	42408	0.0237329	0.129039	1.42213	1.42213	0.000276476	0.00407672	1.7258	1.7258	0.118228	0.326313	1.28234	1.28234
ABCC5	42508	0.00565625	0.0429071	1.32106	1.32106	0.89781	1	1.01346	1.01346	0.0580964	0.20086	1.21348	1.21348
ABCC5-AS1	12	0.978794	1	1.16321	1.16321	0.4177	0.787484	2.14494	2.14494	0.432383	0.684873	2.00514	2.00514
ABCC6	849.937	0.00325704	0.0274317	0.356038	-2.80869	0.0311496	0.176997	1.98661	1.98661	0.000295242	0.00299394	0.283596	-3.52615
ABCC6P1	14.9222	0.156129	0.457805	0.240648	-4.15544	0.839659	0.990012	0.772645	-1.29426	0.771603	0.90411	0.704346	-1.41976
ABCC6P2	16.141	0.99414	1	1.05345	1.05345	0.917508	1	2.08744	2.08744	0.401317	0.657842	4.26024	4.26024
ABCC8	2006	0.84294	0.974957	0.811554	-1.2322	0.275165	0.658704	2.49022	2.49022	0.092312	0.275652	3.80393	3.80393
ABCC9	70	0.0847639	0.312803	24.8752	24.8752	0.281	0.66566	0.0196434	-50.9077	0.0528384	0.187287	31.2497	31.2497
ABCD1	8861	0.474876	0.790489	0.919291	-1.0878	0.00201383	0.0208876	1.41681	1.41681	0.0414013	0.157122	1.26532	1.26532
ABCD2	1428	8.66512e-33	2.49007e-30	21.6188	21.6188	0.224416	0.602039	1.34393	1.34393	2.43383e-40	9.90823e-38	32.799	32.799
ABCD3	51163	0.610685	0.868219	1.07052	1.07052	0.667165	0.926179	0.942322	-1.06121	0.556807	0.77929	1.08163	1.08163
ABCD4	19186.2	0.262172	0.604068	0.830261	-1.20444	0.534565	0.862085	0.903941	-1.10627	0.197688	0.450708	0.807219	-1.23882
ABCE1	159668	4.23785e-05	0.000716365	1.36338	1.36338	0.948745	1	1.00523	1.00523	0.025532	0.111069	1.19029	1.19029
ABCF1	96866.1	0.0807153	0.303028	1.18351	1.18351	0.669514	0.926753	0.957585	-1.04429	0.364712	0.626279	1.09317	1.09317
ABCF2	86030.3	0.00581489	0.04394	1.32552	1.32552	0.640998	0.914064	0.949769	-1.05289	0.166635	0.406875	1.15683	1.15683
ABCF3	28929	0.0572913	0.24248	1.41565	1.41565	0.560663	0.876967	1.11852	1.11852	0.0396024	0.152277	1.45371	1.45371
ABCG1	363	0.783862	0.953705	0.770807	-1.29734	0.659655	0.922081	0.705423	-1.41759	0.00927701	0.0511952	25.3082	25.3082
ABCG2	2262	0.00419677	0.0337347	20.8701	20.8701	0.0304976	0.17446	10.5283	10.5283	0.0306953	0.126883	10.4121	10.4121
ABCG4	1981	0.568055	0.84427	1.55932	1.55932	0.321587	0.707892	2.07245	2.07245	0.10631	0.304138	3.08669	3.08669
ABCG5	21	0.65777	0.89399	0.361675	-2.76491	0.989223	1	1.01896	1.01896	0.282037	0.544701	0.724023	-1.38117
ABHD1	369.026	0.908918	0.992927	0.914707	-1.09325	0.523073	0.855487	1.24385	1.24385	0.985529	0.995408	0.982527	-1.01778
ABHD10	31694.9	0.00705004	0.0513856	1.51818	1.51818	0.839626	0.990012	1.03453	1.03453	0.00844475	0.0476795	1.50553	1.50553
ABHD11	6760.99	0.552968	0.836401	0.904891	-1.10511	0.350255	0.733426	1.16354	1.16354	0.465368	0.711784	0.887618	-1.12661
ABHD11-AS1	14	0.901809	0.991551	1.92668	1.92668	0.262122	0.64401	6.14997	6.14997	0.337089	0.599259	3.08769	3.08769
ABHD12	33513.1	0.521627	0.817787	0.930757	-1.07439	0.79823	0.97852	0.971712	-1.02911	0.645744	0.836388	1.05062	1.05062
ABHD12B	484	0.204386	0.532225	0.620846	-1.6107	0.0877128	0.351137	0.53165	-1.88094	0.158181	0.393358	0.583975	-1.7124
ABHD13	16751	0.922472	0.995914	0.97807	-1.02242	0.352461	0.735838	0.799758	-1.25038	0.726208	0.882185	0.922237	-1.08432
ABHD14A	8098.63	1.33033e-05	0.000264455	1.41015	1.41015	0.00231713	0.0234728	1.13332	1.13332	3.77135e-07	8.14319e-06	1.94741	1.94741
ABHD14A-ACY1	1107.84	0.989488	1	1.01345	1.01345	0.93445	1	0.917839	-1.08952	0.50952	0.74597	1.81347	1.81347
ABHD14B	39376.6	0.0800782	0.301881	1.32531	1.32531	0.0301676	0.17318	1.41096	1.41096	0.0806007	0.250933	1.32469	1.32469
ABHD15	21759	0.0913842	0.328744	1.41235	1.41235	0.382892	0.763272	1.20295	1.20295	0.781331	0.909084	1.0624	1.0624
ABHD16A	17033.9	0.950646	1	1.01461	1.01461	0.947856	1	1.01542	1.01542	0.494309	0.734195	1.1677	1.1677
ABHD16B	4338	0.857648	0.979086	1.09014	1.09014	0.43113	0.798305	1.4282	1.4282	0.793334	0.915104	1.13354	1.13354
ABHD17A	38954.4	0.626361	0.875769	1.07162	1.07162	0.471781	0.825415	0.898841	-1.11254	0.79362	0.915104	0.962778	-1.03866
ABHD17B	42193.2	0.0888696	0.322569	1.27856	1.27856	0.476163	0.829013	1.1121	1.1121	0.951918	0.984358	1.00929	1.00929
ABHD17C	53989.3	0.288093	0.633181	1.10252	1.10252	0.718426	0.947956	1.03415	1.03415	0.672713	0.851107	0.961301	-1.04026
ABHD2	109062	0.72551	0.929832	0.968222	-1.03282	0.324458	0.711266	1.09196	1.09196	0.451144	0.700261	1.06995	1.06995
ABHD3	10720	0.392204	0.731304	0.785267	-1.27345	0.339979	0.723609	0.761842	-1.31261	0.611984	0.816015	0.870147	-1.14923
ABHD4	12339	0.245573	0.586071	1.5332	1.5332	0.367817	0.749872	1.40143	1.40143	1.34766e-05	0.000203042	4.03947	4.03947
ABHD5	15572	0.729932	0.931598	1.08719	1.08719	0.709687	0.945055	1.09438	1.09438	0.513798	0.749599	1.16841	1.16841
ABHD6	6476	0.644817	0.887412	1.1765	1.1765	0.188664	0.553473	1.54895	1.54895	0.244894	0.503424	1.47863	1.47863
ABHD8	11352	0.442909	0.76773	1.08217	1.08217	0.180103	0.540448	1.14261	1.14261	0.000224912	0.00235784	1.43335	1.43335
ABI1	42082.3	0.00129005	0.0129343	1.60602	1.60602	0.295166	0.681537	1.17869	1.17869	0.296345	0.561023	1.17828	1.17828
ABI2	113206	0.912944	0.994595	1.01035	1.01035	0.114981	0.416931	1.15457	1.15457	0.0882405	0.267086	1.16771	1.16771
ABI3	61	0.894714	0.990679	1.04837	1.04837	0.706683	0.943387	2.1774	2.1774	0.649846	0.838478	1.50139	1.50139
ABI3BP	162	0.681687	0.90655	1.17111	1.17111	0.518702	0.853	0.794526	-1.25861	0.966134	0.988869	1.12255	1.12255
ABL1	21036	0.0281956	0.146925	1.79618	1.79618	0.0708077	0.309473	1.63318	1.63318	2.03476e-07	4.54935e-06	3.52325	3.52325
ABL2	65869	3.57129e-05	0.000618128	1.63881	1.63881	0.265274	0.648538	1.1541	1.1541	0.029888	0.12437	1.31189	1.31189
ABLIM1	100045	0.0803538	0.302362	1.18457	1.18457	0.765729	0.966796	1.03028	1.03028	0.102381	0.295882	1.17188	1.17188
ABLIM2	1148	0.982395	1	0.966799	-1.03434	0.981911	1	0.965675	-1.03554	0.0926303	0.276265	7.09177	7.09177
ABLIM3	2172.97	0.311462	0.656366	4.23545	4.23545	0.49804	0.841667	2.6712	2.6712	0.0107056	0.0571899	63.1188	63.1188
ABO	36	1	1	1	-1	0.242477	0.62227	143.935	143.935	0.0275752	0.117243	1390.59	1390.59
ABR	55361.6	0.458278	0.778782	1.10847	1.10847	0.0115741	0.0838905	1.39528	1.39528	0.0611713	0.208322	1.28575	1.28575
ABRA	39	0.61221	0.868689	11.9535	11.9535	0.387036	0.767887	0.362404	-2.75935	0.414923	0.669696	0.500679	-1.99729
ABRACL	19756	0.403116	0.740017	0.844325	-1.18438	0.0900088	0.356695	0.696156	-1.43646	0.371823	0.633437	0.83418	-1.19878
ABT1	28403	0.65514	0.892462	1.07945	1.07945	0.40537	0.78029	0.860126	-1.16262	0.989342	0.996828	0.9976	-1.00241
ABTB1	1770	0.828254	0.968518	0.86105	-1.16137	0.411097	0.78501	1.65689	1.65689	0.820317	0.928606	1.1601	1.1601
ABTB2	6704	0.0359383	0.175524	0.409671	-2.44098	0.621118	0.903327	1.16939	1.16939	0.187173	0.436561	0.611206	-1.63611
AC093375.1	23	1	1	1	-1	1	1	1	-1	0.2302	0.486331	762.363	762.363
ACAA1	25557.9	0.621162	0.872766	0.917243	-1.09022	0.539438	0.865265	0.897606	-1.11407	0.435959	0.687632	0.87101	-1.14809
ACAA2	80002	0.860603	0.979958	1.01892	1.01892	0.885297	0.99881	1.01553	1.01553	0.780914	0.908973	0.970403	-1.0305
ACACA	223374	0.0633732	0.259183	1.13229	1.13229	2.57718e-05	0.000553413	1.31307	1.31307	0.0259165	0.112316	1.15978	1.15978
ACACB	11396	0.993086	1	1.00256	1.00256	0.514184	0.850705	1.20212	1.20212	0.698393	0.867156	1.11762	1.11762
ACAD10	19786	0.662104	0.896368	1.09934	1.09934	0.844317	0.99074	1.04404	1.04404	0.61875	0.820273	1.11359	1.11359
ACAD11	14779.3	0.162896	0.468732	1.46406	1.46406	0.0517191	0.251654	1.67796	1.67796	0.100493	0.292005	1.55778	1.55778
ACAD8	17462	9.41421e-19	1.05726e-16	1.39644	1.39644	4.97846e-10	2.77163e-08	1.20275	1.20275	8.34826e-15	5.19533e-13	1.29915	1.29915
ACAD9	42453.5	0.938008	1	1.01106	1.01106	0.723642	0.9496	0.950557	-1.05201	0.529644	0.761236	0.912999	-1.09529
ACADL	416	0.813191	0.963814	0.694697	-1.43948	0.528505	0.858418	0.200943	-4.97652	0.713875	0.875802	1.72227	1.72227
ACADM	39762.4	0.383275	0.72454	1.06169	1.06169	0.986223	1	1.00123	1.00123	0.448971	0.698793	1.05397	1.05397
ACADS	13892	0.766033	0.945112	0.928744	-1.07672	0.993146	1	0.997912	-1.00209	0.205485	0.461115	0.713046	-1.40243
ACADSB	49843	0.0270956	0.142447	1.34965	1.34965	0.574867	0.884109	1.0832	1.0832	0.120837	0.330293	1.23905	1.23905
ACADVL	50899	0.279025	0.623688	1.16637	1.16637	0.0132539	0.0933647	1.40246	1.40246	0.071497	0.231273	1.285	1.285
ACAN	211	0.356564	0.702011	0.835293	-1.19718	0.135874	0.460479	0.738276	-1.35451	0.515792	0.751373	0.878467	-1.13835
ACAP1	164	0.0385124	0.184861	35.9093	35.9093	0.0299328	0.172116	57.1519	57.1519	0.0341798	0.137119	60.7283	60.7283
ACAP2	63608	2.50816e-05	0.000463251	1.68715	1.68715	0.288849	0.674989	1.15318	1.15318	0.00175346	0.0134568	1.48867	1.48867
ACAP3	29024	0.975191	1	1.00563	1.00563	0.754395	0.963757	0.944227	-1.05907	0.59225	0.803301	1.09924	1.09924
ACAT1	87147	0.0343117	0.170131	1.24313	1.24313	0.212244	0.585412	1.13977	1.13977	0.451483	0.7004	1.0832	1.0832
ACAT2	44525.8	0.174912	0.488296	0.818187	-1.22221	0.387731	0.768501	1.12501	1.12501	0.265773	0.527725	0.849648	-1.17696
ACBD3	41292	0.779657	0.951432	1.04318	1.04318	0.43716	0.802644	1.1223	1.1223	0.653696	0.840387	1.0698	1.0698
ACBD4	8578.01	0.646453	0.888312	0.859308	-1.16373	0.710227	0.945179	1.12171	1.12171	0.551802	0.775515	0.819362	-1.22046
ACBD5	27889.3	0.637401	0.882426	1.09277	1.09277	0.474726	0.827605	1.14242	1.14242	0.160601	0.397355	1.28985	1.28985
ACBD6	29532	0.223816	0.560214	1.1816	1.1816	0.759622	0.965756	1.04406	1.04406	0.210755	0.467093	1.18799	1.18799
ACBD7	10374	1.05847e-25	1.91514e-23	0.311613	-3.20911	1.99164e-25	6.82781e-23	0.315146	-3.17313	3.97371e-11	1.61435e-09	0.506949	-1.97259
ACCS	9745.99	0.141745	0.431439	1.64764	1.64764	0.0429231	0.22207	1.9497	1.9497	0.188725	0.438253	1.56995	1.56995
ACD	19363.6	0.389583	0.729828	0.847541	-1.17988	0.751371	0.961667	0.942274	-1.06126	0.267377	0.529417	0.805999	-1.2407
ACE	4968	0.620016	0.872319	0.752636	-1.32866	0.0140226	0.097828	2.92955	2.92955	0.266353	0.528406	1.698	1.698
ACE2	40	0.202425	0.529257	0.634599	-1.5758	0.368981	0.750755	0.713694	-1.40116	0.666327	0.846984	0.844163	-1.1846
ACER2	1231	0.000993459	0.0104484	1.82427	1.82427	2.373e-05	0.000514088	2.13303	2.13303	5.68442e-06	9.42149e-05	2.27727	2.27727
ACER3	41446.5	0.7681	0.945509	1.0406	1.0406	0.476479	0.829034	0.905474	-1.10439	0.191098	0.441251	0.829791	-1.20512
ACHE	5290.98	0.962643	1	1.02487	1.02487	0.598514	0.89493	1.29868	1.29868	0.0299159	0.1244	2.59535	2.59535
ACIN1	182164	0.402293	0.739345	0.942988	-1.06046	0.108227	0.402034	0.892063	-1.121	0.296663	0.561244	0.929206	-1.07619
ACKR1	582.999	0.99765	1	0.97316	-1.02758	0.626626	0.906358	0.0196434	-50.9077	0.535018	0.764579	377.814	377.814
ACKR2	101	0.790031	0.95504	0.881418	-1.13454	0.330129	0.715619	1.33803	1.33803	0.0978845	0.286857	1.89842	1.89842
ACKR3	434	0.458858	0.779207	0.210487	-4.75088	0.979801	1	0.968657	-1.03236	0.72821	0.883135	0.60806	-1.64457
ACKR4	779	0.675676	0.904062	0.856832	-1.16709	0.434116	0.800245	1.34676	1.34676	0.622349	0.821322	0.812279	-1.2311
ACLY	283011	0.384107	0.724992	0.950138	-1.05248	0.00103758	0.0121264	1.19984	1.19984	0.619765	0.820273	0.971422	-1.02942
ACMSD	33.2087	0.0121238	0.0782399	0.275071	-3.63542	0.144067	0.475535	1.70458	1.70458	0.528602	0.760746	0.879278	-1.1373
ACN9	17524	0.0679509	0.271762	1.47082	1.47082	0.767518	0.967502	0.933243	-1.07153	0.487444	0.729061	1.16721	1.16721
ACO1	52681.1	0.944637	1	0.990823	-1.00926	0.525161	0.856459	0.917567	-1.08984	0.430796	0.683794	1.10717	1.10717
ACO2	135382	1.8043e-05	0.00034835	1.45923	1.45923	1.26834e-05	0.000297891	1.46853	1.46853	2.19868e-05	0.000314989	1.45397	1.45397
ACOT1	78.1604	0.999995	1	1.00002	1.00002	1	1	1	-1	0.2302	0.486331	2588.32	2588.32
ACOT11	1915.78	0.000488546	0.00575447	1.48537	1.48537	1.94137e-05	0.000437559	2.29491	2.29491	2.01872e-05	0.00029264	2.27675	2.27675
ACOT12	59	0.123487	0.397473	3.56641	3.56641	0.0520163	0.252535	7.26941	7.26941	0.0440945	0.163968	7.87767	7.87767
ACOT13	31804.7	0.000425891	0.00512774	1.42782	1.42782	0.00990273	0.0742139	1.30191	1.30191	2.36526e-05	0.000334925	1.52541	1.52541
ACOT2	295.319	0.667471	0.89967	2.16076	2.16076	0.812276	0.9821	1.44672	1.44672	0.171075	0.413267	33.3731	33.3731
ACOT4	71.5204	0.523183	0.818563	108.564	108.564	0.604759	0.896699	37.9282	37.9282	0.335382	0.597693	2262.06	2262.06
ACOT6	20	0.818155	0.965608	3.55182	3.55182	0.325305	0.711704	3.98838	3.98838	0.234949	0.491189	9.89228	9.89228
ACOT7	68143.9	0.00418777	0.0336848	0.715692	-1.39725	0.0467998	0.235068	0.798429	-1.25246	0.0771564	0.243843	0.819829	-1.21977
ACOT8	7671.34	0.495623	0.803376	0.943536	-1.05984	0.412919	0.786011	0.932779	-1.07207	0.951228	0.984166	1.00187	1.00187
ACOT9	27899.9	0.731902	0.932037	1.06497	1.06497	0.322609	0.708805	1.1936	1.1936	0.849519	0.941819	1.03584	1.03584
ACOX1	82684.5	0.000177793	0.00243636	1.56459	1.56459	1.53277e-05	0.000353206	1.66559	1.66559	5.65159e-09	1.67584e-07	1.9511	1.9511
ACOX2	17	0.000264114	0.00343155	0.0108029	-92.5681	0.0634162	0.287255	2.63592	2.63592	0.0371344	0.145216	3.48609	3.48609
ACOX3	6915.98	0.00158675	0.0153044	1.29217	1.29217	0.0784441	0.329155	1.15455	1.15455	5.03211e-06	8.41887e-05	1.446	1.446
ACOXL	43	0.921692	0.995914	1.64327	1.64327	0.275486	0.658826	2.53343	2.53343	0.49822	0.737107	1.8001	1.8001
ACP1	88608.7	0.790079	0.95504	0.973821	-1.02688	0.160407	0.506548	0.865681	-1.15516	0.401073	0.657663	0.918564	-1.08866
ACP2	16497.8	0.0704467	0.278326	1.40297	1.40297	0.192288	0.559567	1.28351	1.28351	0.00920364	0.0508909	1.60943	1.60943
ACP5	91	0.492656	0.801315	0.889514	-1.12421	0.429819	0.797558	0.859864	-1.16298	0.946257	0.982206	0.980412	-1.01998
ACP6	6149	0.833492	0.970747	0.927504	-1.07816	0.465998	0.822074	1.27567	1.27567	0.744748	0.890664	0.890493	-1.12297
ACPT	45	0.483014	0.795198	0.788152	-1.26879	0.57517	0.884366	0.751564	-1.33056	0.375464	0.636434	0.565485	-1.76839
ACR	36	0.10477	0.359176	5.90414	5.90414	0.147099	0.482616	3.58588	3.58588	0.0891711	0.26882	8.51854	8.51854
ACRBP	247	0.985802	1	1.05013	1.05013	0.302414	0.689411	0.730848	-1.36827	0.984236	0.99472	0.989922	-1.01018
ACRC	3394	0.106094	0.36194	1.84911	1.84911	0.674495	0.928518	1.18918	1.18918	0.356838	0.619356	1.43927	1.43927
ACRV1	301	0.104572	0.359074	0.711427	-1.40563	0.0253613	0.153147	0.616094	-1.62313	0.0918209	0.2749	0.727847	-1.37392
ACSBG1	1744	0.981397	1	1.03376	1.03376	0.919533	1	1.15099	1.15099	0.0352867	0.140364	9.88506	9.88506
ACSBG2	327	0.393511	0.732466	1.14885	1.14885	0.612586	0.899334	1.07389	1.07389	0.559683	0.781173	1.08614	1.08614
ACSF2	4248.04	0.677484	0.904778	1.23109	1.23109	0.507777	0.846177	1.38051	1.38051	0.372392	0.633862	1.53067	1.53067
ACSF3	14442	0.319834	0.664526	1.20272	1.20272	0.902723	1	0.976842	-1.02371	0.738028	0.886905	1.06729	1.06729
ACSL1	79980.2	4.36705e-14	3.22024e-12	2.25808	2.25808	0.000500286	0.0066504	1.4973	1.4973	0.721277	0.880045	0.955205	-1.0469
ACSL3	67655.6	0.000175295	0.00241228	1.61612	1.61612	0.424135	0.792429	1.11698	1.11698	7.73099e-10	2.58684e-08	2.1179	2.1179
ACSL4	62554.9	0.000528585	0.00612824	1.61428	1.61428	8.42618e-07	2.67299e-05	1.93245	1.93245	4.90781e-05	0.000639522	1.73889	1.73889
ACSL5	131	0.726181	0.930084	1.0865	1.0865	0.669742	0.927003	0.73387	-1.36264	0.417517	0.67183	1.5665	1.5665
ACSL6	4293.01	0.874416	0.984045	1.12815	1.12815	0.328082	0.713755	1.94997	1.94997	0.00229556	0.016788	6.19931	6.19931
ACSM3	125.009	0.421043	0.754848	0.647481	-1.54445	0.4989	0.842061	0.738756	-1.35363	0.98202	0.994162	1.0241	1.0241
ACSS1	25579.9	0.761982	0.943803	1.05773	1.05773	0.769278	0.967526	0.945644	-1.05748	0.761534	0.899368	0.943806	-1.05954
ACSS2	21624.8	0.622191	0.873348	0.920564	-1.08629	0.0021312	0.0218958	1.59146	1.59146	0.718987	0.879042	1.06102	1.06102
ACSS3	39	0.700429	0.916158	0.299479	-3.33913	0.270358	0.654169	0.0971925	-10.2889	0.455715	0.703975	1.58934	1.58934
ACTA1	11471.8	0.475395	0.790747	99.2108	99.2108	0.69964	0.941225	0.202466	-4.9391	0.9143	0.968891	4.11449	4.11449
ACTA2	12194	1.70576e-40	7.40715e-38	14.1166	14.1166	0.0383819	0.205993	0.560226	-1.78499	2.02514e-14	1.20283e-12	4.8473	4.8473
ACTA2-AS1	398.21	8.8361e-06	0.000184676	5.32823	5.32823	2.26005e-05	0.000492897	0.223563	-4.47301	0.0269436	0.115259	2.28042	2.28042
ACTB	2.02579e+06	0.129609	0.407798	0.957139	-1.04478	1.12045e-12	9.27744e-11	1.21875	1.21875	8.95146e-05	0.00107976	1.11668	1.11668
ACTBL2	191.466	0.715112	0.925438	44.3918	44.3918	0.613429	0.899795	0.00991913	-100.815	0.738451	0.887131	31.9549	31.9549
ACTC1	2351.02	0.87975	0.985836	40.2753	40.2753	0.732933	0.954266	0.250969	-3.98455	0.399389	0.656279	0.95597	-1.04606
ACTG1	1.60639e+06	0.024001	0.130134	1.09908	1.09908	4.77548e-24	1.37232e-21	1.51286	1.51286	1.4131e-06	2.67312e-05	1.22239	1.22239
ACTG1P4	235.708	0.999846	1	1.039	1.039	0.467489	0.82299	1.28412	1.28412	0.0616708	0.209548	2.05623	2.05623
ACTG2	4007.17	0.000284138	0.00364805	0.0617332	-16.1987	0.00140412	0.015515	0.0282719	-35.3708	0.000187451	0.00202487	0.135087	-7.40264
ACTL10	318	0.232544	0.571662	1.15108	1.15108	0.0179204	0.118026	0.687396	-1.45477	0.423952	0.677824	1.08848	1.08848
ACTL6A	58869.6	0.0822757	0.306998	0.808654	-1.23662	0.0791575	0.330909	0.806765	-1.23952	0.0661066	0.21958	0.79817	-1.25287
ACTL6B	1529	0.434098	0.761839	1.63858	1.63858	0.427332	0.795286	2.52781	2.52781	0.138619	0.361554	332.02	332.02
ACTL8	2314	0.29378	0.638359	1.74446	1.74446	0.573126	0.883098	0.696913	-1.4349	0.818827	0.928132	1.13886	1.13886
ACTN1	92294.7	0.963522	1	0.995236	-1.00479	0.0116439	0.0843028	1.28175	1.28175	0.542759	0.769781	1.06451	1.06451
ACTN1-AS1	10	0.0735755	0.286111	149.889	149.889	0.0720027	0.312876	180.863	180.863	0.244111	0.502441	135.972	135.972
ACTN2	3986.18	0.0394367	0.187868	3.32982	3.32982	0.139658	0.468695	2.44992	2.44992	0.0841088	0.258688	2.79888	2.79888
ACTN3	1674.01	0.230697	0.569173	33.4539	33.4539	0.91385	1	1.02242	1.02242	0.848525	0.941545	1.30695	1.30695
ACTN4	142515	0.0002677	0.00346661	0.745154	-1.34201	0.337174	0.720781	0.929668	-1.07565	0.00116129	0.00948693	0.771361	-1.29641
ACTR10	36400	0.61231	0.868689	1.08645	1.08645	0.821452	0.985098	0.962672	-1.03878	0.111388	0.313862	1.28487	1.28487
ACTR1A	91095.2	0.572339	0.847726	1.05979	1.05979	0.635554	0.910705	1.05007	1.05007	0.194884	0.4469	1.14	1.14
ACTR1B	31126.8	0.693327	0.912828	0.935442	-1.06901	0.669953	0.927083	0.930284	-1.07494	0.761391	0.899266	0.950135	-1.05248
ACTR2	256609	0.245712	0.586115	1.07372	1.07372	0.0378415	0.204214	1.13383	1.13383	0.105537	0.302522	1.10355	1.10355
ACTR3	213669	0.0734678	0.285926	0.887704	-1.1265	0.215426	0.589246	1.08159	1.08159	0.0410517	0.156129	0.872325	-1.14636
ACTR3B	13901.8	0.867088	0.982637	0.958304	-1.04351	0.854464	0.994016	1.04723	1.04723	0.992723	0.997681	0.997726	-1.00228
ACTR3BP5	63.6156	0.483688	0.795198	1.5328	1.5328	0.444906	0.808735	1.62128	1.62128	0.670299	0.849988	1.6681	1.6681
ACTR3C	14.1889	0.337751	0.683267	128.299	128.299	0.42277	0.791084	47.589	47.589	0.0826248	0.255228	377.273	377.273
ACTR5	14331	0.55583	0.838094	1.15028	1.15028	0.876176	0.996484	1.03841	1.03841	0.545355	0.77156	1.15407	1.15407
ACTR6	22385	0.853152	0.97811	1.03747	1.03747	0.997357	1	1.00063	1.00063	0.618034	0.819989	0.902466	-1.10808
ACTR8	21089	0.854307	0.978375	1.03619	1.03619	0.962243	1	0.99101	-1.00907	0.770621	0.903525	1.05822	1.05822
ACTRT3	1163	0.213896	0.545678	0.642421	-1.55661	0.483622	0.833594	1.27622	1.27622	0.623511	0.822086	0.833608	-1.19961
ACVR1	13007.9	0.0664391	0.267633	1.41452	1.41452	0.317958	0.703871	1.21456	1.21456	0.341618	0.60385	1.20245	1.20245
ACVR1B	31116	0.274658	0.618115	0.821756	-1.21691	0.856216	0.994047	0.969307	-1.03166	0.690225	0.862394	1.06923	1.06923
ACVR1C	28486.3	2.45442e-16	2.16044e-14	28.1466	28.1466	0.0792536	0.33113	0.107435	-9.30794	1.1772e-09	3.84033e-08	12.5269	12.5269
ACVR2A	14319.6	0.000469199	0.00557024	0.362035	-2.76216	0.0609664	0.279527	0.637847	-1.56777	0.111561	0.314169	0.688554	-1.45232
ACVR2B	49238	0.229998	0.568839	0.849647	-1.17696	0.226352	0.604388	0.848504	-1.17854	0.451701	0.7004	0.904412	-1.10569
ACVR2B-AS1	3229	0.601761	0.864329	0.897905	-1.1137	0.781847	0.972416	0.943227	-1.06019	0.664008	0.846066	0.920347	-1.08655
ACVRL1	26	0.094378	0.336172	11.526	11.526	0.285724	0.67164	1.68095	1.68095	0.0970808	0.285297	8.57352	8.57352
ACY1	11648.5	0.516232	0.814771	0.837457	-1.19409	0.683265	0.93248	0.8963	-1.1157	0.302593	0.566259	0.747778	-1.3373
ACYP1	5942.01	0.988247	1	0.996588	-1.00342	0.812164	0.982086	0.954383	-1.0478	0.47047	0.716212	1.15221	1.15221
ACYP2	2040	0.417448	0.752381	0.719737	-1.3894	0.443844	0.808133	0.731951	-1.36621	0.876474	0.953223	0.954351	-1.04783
ADA	12786	0.258351	0.59933	1.38403	1.38403	0.0931453	0.364844	1.59842	1.59842	0.274914	0.537262	1.36976	1.36976
ADAL	462.336	0.313058	0.658076	99.7154	99.7154	0.597795	0.894534	48.6449	48.6449	0.265552	0.527406	15206.3	15206.3
ADAM10	77155	0.0418422	0.19528	1.16291	1.16291	0.0137754	0.0963987	1.19938	1.19938	0.0352498	0.140288	1.16887	1.16887
ADAM11	29704	1.3571e-06	3.42181e-05	1.79546	1.79546	0.03012	0.172957	1.3179	1.3179	8.82799e-08	2.09863e-06	1.90245	1.90245
ADAM12	326	0.661753	0.896079	3.11285	3.11285	0.527066	0.85714	4.67312	4.67312	0.56706	0.786146	4.3475	4.3475
ADAM15	66244.2	0.000105556	0.00155909	0.63483	-1.57523	0.468032	0.823668	0.926429	-1.07941	4.25808e-07	9.1336e-06	0.534965	-1.86928
ADAM17	34555	9.20784e-30	2.09221e-27	1.32905	1.32905	6.15249e-07	2.01047e-05	1.10661	1.10661	5.40767e-05	0.000691566	1.08434	1.08434
ADAM19	4904	0.888512	0.988354	0.919864	-1.08712	0.0172153	0.114462	3.00839	3.00839	0.00647268	0.0385735	3.4572	3.4572
ADAM1A	9829	0.0313942	0.158849	0.938215	-1.06585	2.92766e-07	1.03266e-05	0.808429	-1.23697	3.77841e-06	6.53398e-05	0.837727	-1.19371
ADAM20	35	0.831951	0.970078	1.04844	1.04844	0.112096	0.411741	0.313139	-3.19347	0.82604	0.931266	1.17553	1.17553
ADAM20P1	137	0.717622	0.92598	1.30574	1.30574	0.41686	0.787191	0.556054	-1.79839	0.808953	0.923425	1.75903	1.75903
ADAM21	89.2426	0.385043	0.725637	0.761145	-1.31381	0.443748	0.80806	1.39319	1.39319	0.0722836	0.232988	2.13044	2.13044
ADAM22	29663.1	0.933513	0.999516	1.01528	1.01528	0.969368	1	0.993006	-1.00704	0.262903	0.525026	1.21523	1.21523
ADAM23	28075	0.0140332	0.0876925	1.6277	1.6277	0.0743483	0.318274	1.43722	1.43722	0.00230821	0.016849	1.80899	1.80899
ADAM32	157	0.0455728	0.207023	2.02667	2.02667	0.525154	0.856459	1.14301	1.14301	0.047018	0.171767	1.96832	1.96832
ADAM33	16	0.00191897	0.0179591	196.798	196.798	0.00332751	0.0316413	85.5731	85.5731	0.00127347	0.0102534	427.131	427.131
ADAM7	281	3.92959e-05	0.000672989	2936.78	2936.78	1	1	1	-1	2.21688e-05	0.000317363	8598.04	8598.04
ADAM8	1501	0.300788	0.645369	1.15128	1.15128	0.217849	0.593225	0.844534	-1.18408	0.0272001	0.115955	1.35234	1.35234
ADAM9	53022.4	0.0726538	0.284171	1.27176	1.27176	0.0460979	0.232524	1.30423	1.30423	0.0436805	0.162987	1.30802	1.30802
ADAMTS1	4536	0.118026	0.386388	2.16423	2.16423	0.500424	0.84249	1.43164	1.43164	0.169329	0.410529	1.98957	1.98957
ADAMTS10	2623.99	0.483116	0.795198	1.81091	1.81091	0.214336	0.588085	2.68777	2.68777	0.0558581	0.195473	4.24671	4.24671
ADAMTS12	1485	0.143645	0.435188	2.67177	2.67177	0.850712	0.993336	0.854902	-1.16973	0.237835	0.495367	0.064166	-15.5846
ADAMTS13	3306	0.692563	0.912322	1.26164	1.26164	0.488172	0.8362	1.48128	1.48128	0.2789	0.541694	1.80643	1.80643
ADAMTS14	64	0.124322	0.39806	3.27026	3.27026	0.7906	0.97577	0.746469	-1.33964	0.0452802	0.167294	6.60814	6.60814
ADAMTS15	1074	0.00136524	0.013525	0.191125	-5.23218	0.249466	0.630709	0.633857	-1.57764	0.0155466	0.076446	0.343142	-2.91425
ADAMTS16	73	0.317299	0.662077	1.09554	1.09554	0.979723	1	1.30838	1.30838	0.518655	0.753669	6.62584	6.62584
ADAMTS17	3928	0.911429	0.994122	0.948354	-1.05446	0.764159	0.966486	0.864099	-1.15728	0.92454	0.973635	0.955948	-1.04608
ADAMTS18	117	0.997363	1	0.97316	-1.02758	0.586789	0.8897	0.0196434	-50.9077	0.609555	0.814282	74.7984	74.7984
ADAMTS19	42	1	1	1	-1	1	1	1	-1	0.2302	0.486331	1391.31	1391.31
ADAMTS2	13042	0.725028	0.929522	0.905612	-1.10423	0.227169	0.605278	1.36221	1.36221	0.931407	0.9769	1.0239	1.0239
ADAMTS20	303	9.07778e-05	0.00137456	11641.3	11641.3	0.000390883	0.00547544	845.57	845.57	0.000231013	0.00241402	1657.05	1657.05
ADAMTS3	23511	4.94527e-06	0.000108579	3.05034	3.05034	0.0498817	0.245234	1.68699	1.68699	7.08146e-11	2.80119e-09	4.60308	4.60308
ADAMTS4	111	0.04916	0.218277	2.94788	2.94788	0.349376	0.733051	1.71527	1.71527	0.0678773	0.223336	3.05427	3.05427
ADAMTS5	1212	0.031068	0.157606	33.3369	33.3369	0.00610832	0.0510363	0.00094504	-1058.16	0.250033	0.509862	15.1293	15.1293
ADAMTS6	2718	0.0125735	0.0806626	4.69583	4.69583	0.779849	0.971576	1.22851	1.22851	0.00564545	0.0346149	5.48197	5.48197
ADAMTS7	20196.2	0.531166	0.823576	1.16365	1.16365	0.184997	0.546953	0.692218	-1.44463	1.47598e-05	0.000220505	2.48597	2.48597
ADAMTS7P1	39.7806	0.442485	0.767204	1.31414	1.31414	0.891102	1	0.720296	-1.38832	0.145195	0.373666	2.32295	2.32295
ADAMTS8	284	0.156966	0.459311	0.36807	-2.71687	0.395736	0.773781	1.9877	1.9877	0.197077	0.44984	3.01715	3.01715
ADAMTS9	6765.25	0.0178766	0.104549	0.348514	-2.86933	0.10825	0.402034	1.59019	1.59019	0.00324509	0.0221799	0.0575537	-17.3751
ADAMTSL1	10561	0.0195936	0.111855	0.529198	-1.88965	0.00199254	0.0207073	0.392731	-2.54627	0.00731503	0.0426441	0.465872	-2.14651
ADAMTSL2	92	0.458427	0.778945	1.58804	1.58804	0.978637	1	1.18043	1.18043	0.182818	0.430054	21.8576	21.8576
ADAMTSL3	594	1.44109e-11	8.16244e-10	6.03785	6.03785	0.4316	0.798305	0.872224	-1.14649	1.02714e-08	2.87556e-07	3.93272	3.93272
ADAMTSL4	7446.01	0.102536	0.354004	2.05104	2.05104	0.00873741	0.0675654	2.98352	2.98352	0.0431815	0.161742	2.3842	2.3842
ADAMTSL4-AS1	82	0.989404	1	1.00253	1.00253	0.971293	1	0.948998	-1.05374	0.466413	0.71301	1.23206	1.23206
ADAMTSL5	2815	0.767655	0.945486	1.20596	1.20596	0.0326276	0.182634	3.16493	3.16493	0.416643	0.671295	1.62287	1.62287
ADAP1	14313	0.0644018	0.261798	1.67759	1.67759	0.498805	0.842061	1.22361	1.22361	0.00550967	0.0341368	2.10978	2.10978
ADAP2	14054	0.584168	0.85322	1.15593	1.15593	0.14621	0.480344	1.44275	1.44275	0.959898	0.987178	1.01386	1.01386
ADAR	326989	3.45457e-05	0.000603807	1.25583	1.25583	0.000560381	0.00730513	1.21086	1.21086	2.65325e-06	4.76975e-05	1.29263	1.29263
ADARB1	17861	0.475335	0.790714	0.864776	-1.15637	0.410186	0.78429	0.844856	-1.18363	0.815138	0.926539	1.04668	1.04668
ADARB2	320	0.233341	0.572822	148.257	148.257	1	1	1	-1	0.231033	0.487149	10494.6	10494.6
ADAT1	19670	0.856314	0.978723	1.03962	1.03962	0.69403	0.939004	0.916486	-1.09112	0.722055	0.880404	1.07862	1.07862
ADAT2	18043	0.0242721	0.131095	1.61254	1.61254	0.306754	0.692874	1.25571	1.25571	0.219262	0.478406	1.31191	1.31191
ADAT3	4400.36	0.949283	1	0.988171	-1.01197	0.20087	0.57228	0.795429	-1.25718	0.403142	0.659297	0.8658	-1.155
ADCK1	9267.03	0.407091	0.743733	1.1657	1.1657	0.949663	1	1.01091	1.01091	0.441497	0.692732	1.1535	1.1535
ADCK2	29611	0.593112	0.8596	1.09823	1.09823	0.828063	0.987506	1.03932	1.03932	0.6938	0.864772	1.07193	1.07193
ADCK3	31336	0.750682	0.939805	1.05296	1.05296	0.706118	0.943148	0.938916	-1.06506	0.0843834	0.259185	0.734595	-1.36129
ADCK4	17261	0.808552	0.962975	1.04581	1.04581	0.402345	0.777976	1.16344	1.16344	0.584629	0.798284	1.10649	1.10649
ADCK5	4386	0.00323539	0.0272983	0.860485	-1.16214	0.634194	0.909696	0.97689	-1.02366	0.00183262	0.0139235	0.853826	-1.1712
ADCY1	46658	3.14739e-12	1.89241e-10	4.28334	4.28334	0.00021635	0.00332889	2.29902	2.29902	3.80491e-19	4.01901e-17	6.12548	6.12548
ADCY10	100	0.700661	0.916257	0.86775	-1.15241	0.15956	0.505015	0.634575	-1.57586	0.278779	0.541567	0.660524	-1.51395
ADCY10P1	876.111	0.558155	0.839066	1.12127	1.12127	0.984599	1	1.00686	1.00686	0.0415903	0.157625	1.43563	1.43563
ADCY2	1720	0.351483	0.696727	1748.49	1748.49	0.553516	0.871777	74.8563	74.8563	0.081781	0.253583	55751.1	55751.1
ADCY3	58989.4	0.263105	0.605301	1.16117	1.16117	6.605e-05	0.00122922	1.64123	1.64123	0.66025	0.844313	1.06179	1.06179
ADCY5	3631.3	0.495767	0.803376	1.81242	1.81242	0.181169	0.541731	2.95789	2.95789	0.00467247	0.0298382	8.20578	8.20578
ADCY6	26848.6	0.391304	0.730794	0.850865	-1.17527	0.585853	0.889136	0.903896	-1.10632	0.859809	0.946295	1.03217	1.03217
ADCY7	60293.9	0.31845	0.663116	0.883401	-1.13199	0.249884	0.630877	1.14348	1.14348	0.0435297	0.16261	0.770748	-1.29744
ADCY8	504	0.279356	0.623874	99.7154	99.7154	1	1	1	-1	0.230202	0.486331	16618.6	16618.6
ADCY9	56496	0.996347	1	0.99941	-1.00059	0.120742	0.42743	1.21046	1.21046	0.315665	0.576811	0.874766	-1.14316
ADCYAP1	1860.99	0.474296	0.789928	0.221946	-4.50561	0.455427	0.815122	0.169388	-5.9036	0.528595	0.760746	138.456	138.456
ADCYAP1R1	1674	0.363952	0.708307	4.5689	4.5689	0.111904	0.4115	12.4964	12.4964	0.00279765	0.019736	182.876	182.876
ADD1	147132	0.000104644	0.00154913	0.925747	-1.08021	0.00102834	0.01204	1.06658	1.06658	2.06372e-05	0.000298278	1.08716	1.08716
ADD2	66940	0.00475975	0.0373535	1.41136	1.41136	0.0119923	0.0863138	1.36197	1.36197	0.0404376	0.154485	1.29036	1.29036
ADD3	44099	0.172615	0.484776	0.809548	-1.23526	0.87746	0.996484	1.02272	1.02272	0.229233	0.486331	1.18435	1.18435
ADD3-AS1	259.991	0.211007	0.541982	1.42885	1.42885	0.276984	0.660793	1.36281	1.36281	0.00179866	0.0137349	2.51555	2.51555
ADH1A	19.9754	0.442233	0.767127	0.677139	-1.4768	0.362098	0.745005	1.13464	1.13464	0.279761	0.542719	1.98762	1.98762
ADH4	34	0.773742	0.948517	0.451325	-2.2157	0.9504	1	0.615963	-1.62348	0.951038	0.984126	0.590491	-1.69351
ADH5	97637	0.433834	0.761753	0.927124	-1.0786	0.542291	0.866698	0.943028	-1.06041	0.481277	0.725163	0.934301	-1.07032
ADH6	247	0.964672	1	1.01464	1.01464	0.499557	0.842276	1.36956	1.36956	0.310601	0.572795	1.44026	1.44026
ADHFE1	491	0.858476	0.979253	1.24666	1.24666	0.620481	0.902971	1.73504	1.73504	0.417782	0.67196	2.62348	2.62348
ADI1	50171	0.0365191	0.177429	1.28736	1.28736	0.00148672	0.0162004	0.629211	-1.58929	0.0199803	0.0920839	0.722082	-1.38488
ADIPOQ-AS1	11.2763	0.517598	0.815203	1.24892	1.24892	0.867054	0.995571	0.547605	-1.82613	0.417425	0.671792	0.430066	-2.32523
ADIPOR1	60686.2	0.00992821	0.0670609	1.37332	1.37332	0.848695	0.993005	1.02539	1.02539	0.0230461	0.102607	1.32535	1.32535
ADIPOR2	84221	0.331131	0.67656	1.1075	1.1075	0.451146	0.812671	1.08284	1.08284	0.464847	0.711231	1.08033	1.08033
ADK	34046.8	6.3218e-10	2.80123e-08	1.80107	1.80107	0.523766	0.856139	1.06797	1.06797	0.00449527	0.0289263	1.32638	1.32638
ADM	14939	1.06097e-05	0.000217094	5.45396	5.45396	7.9021e-06	0.000195215	5.57282	5.57282	1.00835e-06	1.97634e-05	6.435	6.435
ADM2	1978	0.870838	0.983587	1.16492	1.16492	0.0563915	0.266299	4.29299	4.29299	0.555156	0.778044	1.67041	1.67041
ADM5	8373	0.697567	0.915088	1.12902	1.12902	0.342104	0.72579	0.715899	-1.39684	0.905854	0.96549	0.962245	-1.03924
ADNP	156740	0.00079748	0.00869133	0.780292	-1.28157	0.0052472	0.0452896	0.815457	-1.22631	0.000383689	0.00374509	0.768099	-1.30192
ADNP2	63658	0.0404925	0.19108	0.787263	-1.27022	0.0644099	0.290342	0.807001	-1.23916	0.0139148	0.0702424	0.747221	-1.33829
ADO	42026	0.283938	0.629455	0.866767	-1.15371	0.651395	0.918549	0.942793	-1.06068	0.147349	0.376828	0.822172	-1.21629
ADORA1	1042	0.851795	0.977848	1.32066	1.32066	0.499148	0.842098	2.46078	2.46078	0.180505	0.426822	5.19405	5.19405
ADORA2A	1661.09	0.130988	0.410858	3.28076	3.28076	0.977948	1	1.02718	1.02718	0.56916	0.787506	1.64372	1.64372
ADORA2A-AS1	317.47	0.58275	0.852648	0.890495	-1.12297	0.0991669	0.381011	0.701577	-1.42536	0.888903	0.957922	1.02481	1.02481
ADORA2B	9584	1.92512e-31	4.8636e-29	1.95185	1.95185	4.70591e-12	3.55051e-10	1.48206	1.48206	2.62716e-22	3.31209e-20	1.74065	1.74065
ADPGK	80737	0.402772	0.739839	1.09358	1.09358	0.857547	0.994303	0.98048	-1.01991	0.409588	0.664985	1.0922	1.0922
ADPGK-AS1	518.254	0.565338	0.842968	0.863045	-1.15869	0.654839	0.91954	1.16059	1.16059	0.319959	0.581229	1.37492	1.37492
ADPRH	319	0.440859	0.765979	0.211335	-4.73182	0.840865	0.990068	0.751074	-1.33143	0.817015	0.927651	0.834527	-1.19828
ADPRHL1	5566.01	0.639724	0.884187	0.804073	-1.24367	0.186749	0.549754	1.6812	1.6812	0.394374	0.651599	1.41533	1.41533
ADPRHL2	17856	0.424347	0.75676	1.15178	1.15178	0.869868	0.995571	0.969607	-1.03135	0.874155	0.952379	1.02838	1.02838
ADPRM	3210	0.0266644	0.140804	0.892646	-1.12027	0.286176	0.672021	0.951129	-1.05138	0.726017	0.882185	0.984645	-1.01559
ADRA1A	957.998	1.86515e-26	3.50451e-24	0.0981869	-10.1847	1.98103e-25	6.82781e-23	0.104577	-9.56237	1.27235e-20	1.45397e-18	0.138045	-7.24401
ADRA1B	70	0.8252	0.967503	0.688991	-1.4514	0.585315	0.88897	1.6801	1.6801	0.254604	0.515034	8.17847	8.17847
ADRA1D	78	0.829673	0.96896	0.566922	-1.76391	0.292875	0.679443	0.547447	-1.82666	0.343433	0.605578	13.5178	13.5178
ADRA2A	896.632	0.486898	0.796924	0.282842	-3.53554	0.431581	0.798305	0.20172	-4.95737	0.218497	0.477398	5.76631	5.76631
ADRA2B	2436.29	0.831811	0.970012	0.876726	-1.14061	0.423506	0.791856	1.54699	1.54699	0.486671	0.728626	0.623638	-1.60349
ADRA2C	2858.08	0.0348647	0.172043	5.26427	5.26427	0.187966	0.55209	2.98042	2.98042	0.00551157	0.0341368	8.28106	8.28106
ADRB1	398	0.183111	0.501182	1.62269	1.62269	0.698743	0.941005	1.21513	1.21513	0.00764466	0.0442083	2.5017	2.5017
ADRB2	18	0.405904	0.742796	0.419078	-2.38619	0.144642	0.476875	0.0042727	-234.044	0.518148	0.753328	1.56009	1.56009
ADRBK1	69144	0.396887	0.735195	1.09711	1.09711	0.657481	0.920793	1.05022	1.05022	0.435036	0.687227	1.08939	1.08939
ADRBK2	33551	0.324602	0.66966	1.19044	1.19044	0.341964	0.72579	1.1834	1.1834	0.0146962	0.0732414	1.50767	1.50767
ADRM1	71421.2	0.574164	0.848883	1.06501	1.06501	0.350298	0.733437	0.896415	-1.11555	0.728015	0.88309	1.03998	1.03998
ADSL	86752	0.643698	0.88684	1.04793	1.04793	0.674727	0.928696	0.957483	-1.0444	0.622625	0.821576	0.950233	-1.05237
ADSS	41178	0.7417	0.936524	1.04678	1.04678	0.98467	1	1.00262	1.00262	0.721863	0.880354	1.05046	1.05046
ADSSL1	922	0.324502	0.669528	2.94392	2.94392	0.921443	1	1.1286	1.1286	0.243553	0.501873	3.41501	3.41501
AEBP1	326	0.377517	0.720096	6.80601	6.80601	0.95333	1	1.13408	1.13408	0.528735	0.760826	4.04456	4.04456
AEBP2	64888.6	0.00739717	0.0533191	0.746707	-1.33921	1.5073e-08	6.67895e-07	0.496146	-2.01554	5.79286e-05	0.000736968	0.630637	-1.5857
AEN	119633	0.465899	0.783932	0.941294	-1.06237	0.000278546	0.00410178	0.723144	-1.38285	0.0168804	0.0813034	0.813758	-1.22887
AES	148018	0.534369	0.825703	0.951059	-1.05146	0.397432	0.774761	1.06867	1.06867	0.191089	0.441251	1.10709	1.10709
AFAP1	32964.2	0.569762	0.845641	0.905517	-1.10434	0.61713	0.901277	0.916665	-1.09091	0.216309	0.474719	1.22223	1.22223
AFAP1-AS1	358.533	0.259287	0.600311	0.706918	-1.41459	0.963581	1	0.943057	-1.06038	0.877151	0.95341	0.912481	-1.09591
AFAP1L1	2430	0.724117	0.929085	1.32691	1.32691	0.0724851	0.314311	3.42927	3.42927	0.328654	0.589953	2.0524	2.0524
AFAP1L2	942.999	0.744887	0.937447	0.602547	-1.65962	0.744222	0.958659	1.49215	1.49215	0.170405	0.412319	4.46905	4.46905
AFF1	65489.4	0.0717547	0.281954	1.22937	1.22937	0.0515667	0.251225	1.24914	1.24914	0.006885	0.0406219	0.698472	-1.4317
AFF2	24895.8	3.40413e-08	1.15889e-06	0.0192991	-51.8158	0.250951	0.631652	0.83689	-1.1949	6.14508e-12	2.76048e-10	0.125897	-7.94298
AFF3	5393.98	0.646729	0.888312	1.20187	1.20187	0.0294623	0.16993	0.217018	-4.60791	0.327179	0.588576	1.45826	1.45826
AFF4	112643	0.288273	0.633293	0.904833	-1.10518	0.12812	0.444062	1.14474	1.14474	0.762096	0.899377	1.02798	1.02798
AFG3L1P	29576.9	0.445293	0.769089	0.881793	-1.13405	0.229435	0.60833	0.816938	-1.22408	0.304292	0.567599	0.842644	-1.18674
AFG3L2	106502	0.0647955	0.262909	1.19038	1.19038	0.163018	0.511485	1.14215	1.14215	0.217052	0.475602	1.12527	1.12527
AFMID	16558.5	0.552108	0.835882	1.13239	1.13239	0.930105	1	0.98123	-1.01913	0.455416	0.703723	1.16658	1.16658
AFTPH	23578.8	0.49034	0.799191	0.8687	-1.15115	0.613128	0.899795	1.10208	1.10208	0.839689	0.937656	0.960655	-1.04096
AGA	14650.1	0.029511	0.152279	1.24635	1.24635	0.631163	0.908297	0.951818	-1.05062	0.483699	0.726851	1.0742	1.0742
AGAP1	66944.5	0.631839	0.878961	0.944523	-1.05873	0.289409	0.675484	0.879344	-1.13721	0.314951	0.576202	1.12158	1.12158
AGAP11	598.199	0.0476172	0.213278	1.28589	1.28589	0.474118	0.82688	0.916106	-1.09158	0.493604	0.733638	0.922459	-1.08406
AGAP2	3560.21	0.0905166	0.326947	7.84242	7.84242	0.208475	0.581723	4.54749	4.54749	0.00195085	0.014634	76.1862	76.1862
AGAP2-AS1	135.849	0.326232	0.671467	5.28337	5.28337	0.68057	0.931626	1.38307	1.38307	0.102089	0.295326	50.8987	50.8987
AGAP3	50933.3	0.629235	0.877651	1.02306	1.02306	0.0113874	0.082844	0.885141	-1.12976	0.637208	0.830833	1.02304	1.02304
AGAP4	6754.11	0.940169	1	1.02201	1.02201	0.661522	0.923145	0.867235	-1.15309	0.840998	0.938019	0.937765	-1.06637
AGAP5	5317.39	0.429434	0.759281	0.888862	-1.12503	0.129132	0.446061	0.790521	-1.26499	0.387796	0.647132	0.876659	-1.14069
AGAP6	18821.4	0.0315376	0.159409	1.04177	1.04177	5.73504e-05	0.00109763	0.832775	-1.2008	7.58593e-05	0.000932306	0.841697	-1.18808
AGAP7P	13537.6	0.33668	0.681981	1.13176	1.13176	0.574971	0.884198	0.928377	-1.07715	0.747997	0.892508	0.960358	-1.04128
AGAP9	9203.64	0.524453	0.81908	1.19547	1.19547	0.935598	1	1.02398	1.02398	0.879961	0.954447	1.0452	1.0452
AGBL1	10	0.266935	0.610017	0.227725	-4.39127	0.859603	0.994877	0.612358	-1.63303	0.241891	0.500624	0.156759	-6.37924
AGBL2	25	0.546257	0.832394	0.55764	-1.79327	0.577068	0.886098	0.818327	-1.222	0.689797	0.862236	3.01692	3.01692
AGBL3	766	0.0131677	0.0836778	0.73375	-1.36286	0.6639	0.924285	0.949687	-1.05298	0.106478	0.304416	0.830555	-1.20401
AGBL4	113	0.184566	0.503574	0.277914	-3.59823	0.0452226	0.230189	0.00543076	-184.136	0.243425	0.501768	19.9374	19.9374
AGBL5	41160.5	0.971613	1	0.994936	-1.00509	0.83063	0.987727	0.969715	-1.03123	0.549343	0.773673	1.08754	1.08754
AGBL5-AS1	50	0.0680566	0.272104	0.538597	-1.85668	0.0934559	0.365463	0.590228	-1.69426	0.056708	0.197352	0.528968	-1.89047
AGER	3642	0.738406	0.935199	1.02788	1.02788	0.0132137	0.0931829	0.803471	-1.2446	0.715441	0.876626	1.03355	1.03355
AGFG1	74824.3	0.638511	0.883338	0.947872	-1.055	0.0426309	0.221144	1.24194	1.24194	0.62586	0.82307	0.945924	-1.05717
AGFG2	4565	0.574162	0.848883	0.928799	-1.07666	0.669322	0.926553	0.946553	-1.05647	0.768344	0.902079	1.03891	1.03891
AGGF1	35067	0.895398	0.990732	0.979295	-1.02114	0.843351	0.990577	1.0317	1.0317	0.727327	0.882996	1.05638	1.05638
AGK	40843	0.391332	0.730794	1.14513	1.14513	0.0961603	0.372874	1.29175	1.29175	0.17817	0.423245	1.23281	1.23281
AGL	87882.2	0.665424	0.898425	0.959639	-1.04206	0.00889317	0.0684448	1.26374	1.26374	0.288419	0.552837	0.902501	-1.10803
AGMAT	113.008	0.0300806	0.154257	2.4609	2.4609	0.247284	0.628343	1.55981	1.55981	0.199913	0.453282	1.56021	1.56021
AGMO	75	0.575634	0.849301	1.00501	1.00501	0.00159201	0.0171731	0.00187296	-533.914	0.174935	0.418359	3.73799	3.73799
AGO1	63506	0.851399	0.977781	1.02198	1.02198	0.290394	0.676718	0.880315	-1.13596	0.262522	0.524695	0.873386	-1.14497
AGO2	43182.3	0.867524	0.982637	1.02408	1.02408	0.845314	0.991504	0.972192	-1.0286	0.432951	0.685099	0.890528	-1.12293
AGO3	9429.02	0.485529	0.796162	1.24433	1.24433	0.759965	0.965871	1.10322	1.10322	0.388138	0.647507	1.30701	1.30701
AGO4	30124	0.728009	0.930839	1.06407	1.06407	0.802941	0.978868	1.04576	1.04576	0.365325	0.626817	1.1712	1.1712
AGPAT1	75055.6	0.488422	0.797948	1.08204	1.08204	0.592396	0.891977	1.06309	1.06309	0.0700106	0.228082	1.22196	1.22196
AGPAT2	28543	0.628823	0.877451	1.08811	1.08811	0.939976	1	1.01347	1.01347	0.484028	0.726953	0.878976	-1.13769
AGPAT3	62001	0.0399611	0.189534	1.28296	1.28296	0.256683	0.639039	0.859237	-1.16382	0.0393579	0.151515	1.28388	1.28388
AGPAT4	13353	0.0605678	0.251072	0.574779	-1.7398	0.668352	0.926263	0.8948	-1.11757	0.750437	0.89411	1.08187	1.08187
AGPAT4-IT1	544	0.0312844	0.158417	0.409147	-2.44411	0.881392	0.997245	1.03712	1.03712	0.443176	0.693921	0.712216	-1.40407
AGPAT5	64154	0.332315	0.677519	0.893884	-1.11871	0.0436323	0.22461	0.785179	-1.27359	0.113486	0.317438	0.829572	-1.20544
AGPAT6	59138	0.145002	0.437536	1.20006	1.20006	0.864049	0.995299	1.0225	1.0225	0.314544	0.57615	1.13593	1.13593
AGPAT9	13003	0.102506	0.353962	1.84522	1.84522	1.26591e-08	5.7395e-07	6.36225	6.36225	0.936001	0.978305	1.03462	1.03462
AGPS	97871	0.490546	0.799413	0.935146	-1.06935	0.709089	0.944662	1.03599	1.03599	0.181114	0.427588	0.876069	-1.14146
AGR2	32	0.616651	0.870663	0.411552	-2.42983	0.531282	0.86006	0.353183	-2.83139	0.576816	0.793046	3.19554	3.19554
AGRN	80035	1.07498e-09	4.59652e-08	0.504182	-1.98341	0.0280007	0.163674	0.807566	-1.23829	3.30597e-06	5.80954e-05	0.612183	-1.6335
AGRP	155	0.144564	0.436755	0.684602	-1.4607	0.299219	0.685227	1.29955	1.29955	0.473155	0.718265	1.22819	1.22819
AGT	22	0.470396	0.787314	0.509829	-1.96144	0.979472	1	0.828707	-1.2067	0.601401	0.809357	2.06999	2.06999
AGTPBP1	34245.2	0.531111	0.823555	1.11781	1.11781	0.0822731	0.338463	1.34503	1.34503	0.0424185	0.159619	1.40893	1.40893
AGTR1	1711	0.00765256	0.054616	546.582	546.582	0.178852	0.538741	2.87154	2.87154	0.00560722	0.0345042	1116.89	1116.89
AGTRAP	15551.1	0.44114	0.766272	1.21207	1.21207	0.182097	0.543012	1.38235	1.38235	0.673791	0.851928	1.11334	1.11334
AHCTF1	105913	0.419659	0.754143	1.05805	1.05805	0.84286	0.990475	1.01412	1.01412	0.418362	0.672458	1.05838	1.05838
AHCTF1P1	39572.9	0.715198	0.925438	1.05826	1.05826	0.496754	0.84124	1.10989	1.10989	0.569349	0.787561	1.09162	1.09162
AHCY	228141	0.203137	0.530379	0.923088	-1.08332	0.816061	0.983147	1.01438	1.01438	0.00379487	0.0251972	0.829178	-1.20601
AHCYL1	88937.7	0.990072	1	1.00127	1.00127	0.980437	1	1.00249	1.00249	0.994043	0.998365	0.999251	-1.00075
AHCYL2	25711.9	0.745346	0.937548	0.936169	-1.06818	0.300169	0.68684	1.21827	1.21827	0.240105	0.498103	1.24943	1.24943
AHDC1	13906	0.857105	0.978945	0.951874	-1.05056	0.747115	0.959816	1.08919	1.08919	0.345865	0.608422	1.27256	1.27256
AHI1	23270.9	0.225501	0.562785	1.28097	1.28097	0.255755	0.638232	1.26224	1.26224	0.0742332	0.237495	1.4285	1.4285
AHNAK	373940	0.643995	0.886969	0.9158	-1.09194	0.0238841	0.146491	1.74341	1.74341	4.03851e-05	0.000535027	2.68373	2.68373
AHNAK2	10061	0.0372505	0.180665	2.75306	2.75306	0.0302904	0.173732	2.85285	2.85285	6.4454e-06	0.000105485	7.40009	7.40009
AHR	6452	0.294745	0.639257	0.708256	-1.41192	0.00275418	0.0272365	0.232037	-4.30965	0.177474	0.422207	0.631298	-1.58404
AHRR	3346.01	1.67546e-12	1.04601e-10	0.584549	-1.71072	0.00301821	0.0292264	0.803077	-1.24521	1.33292e-11	5.73713e-10	0.599542	-1.66794
AHSA1	121630	0.186884	0.506435	1.12055	1.12055	0.657575	0.920793	0.961082	-1.04049	0.574041	0.791123	1.05046	1.05046
AHSA2	35375.9	0.839009	0.973464	1.03291	1.03291	0.897285	1	1.02085	1.02085	0.675688	0.853205	0.933894	-1.07079
AHSG	68	0.811049	0.963326	0.255066	-3.92055	0.142772	0.47342	11.9444	11.9444	0.357445	0.61979	1.56194	1.56194
AICDA	68	0.090995	0.328008	7.09422	7.09422	0.368422	0.750124	1.01485	1.01485	0.0326029	0.132544	23.3867	23.3867
AIDA	64764	0.000300352	0.00380837	0.883683	-1.13163	0.868894	0.995571	0.994672	-1.00536	0.000116874	0.00135298	0.87649	-1.14091
AIF1	40	0.98317	1	1.16321	1.16321	0.985223	1	1.14195	1.14195	0.355016	0.617514	13.5006	13.5006
AIF1L	35169	0.33016	0.675619	0.861297	-1.16104	0.00726408	0.0583905	0.638561	-1.56602	0.255062	0.51535	0.838817	-1.19216
AIFM1	236678	0.00303866	0.0260317	1.20569	1.20569	0.0207504	0.131821	1.15868	1.15868	0.1123	0.315418	1.10761	1.10761
AIFM2	20761	0.446853	0.769877	1.17411	1.17411	0.481708	0.832568	1.1605	1.1605	0.968907	0.989516	1.00855	1.00855
AIFM3	484	0.535575	0.826283	1.12083	1.12083	1.10213e-05	0.000263606	4.91171	4.91171	0.000266249	0.00272825	0.36524	-2.73793
AIG1	14954	0.299402	0.644269	0.959511	-1.0422	3.45071e-16	4.52552e-14	1.3861	1.3861	0.000635339	0.00578526	1.14472	1.14472
AIM1	1415	0.205914	0.534791	0.677629	-1.47573	0.223	0.60006	0.682145	-1.46596	0.734475	0.885757	0.900316	-1.11072
AIM1L	542	0.0650523	0.263622	1.59491	1.59491	0.000978833	0.0115713	2.36438	2.36438	0.000174272	0.00189931	2.68537	2.68537
AIM2	33	1	1	1	-1	1	1	1	-1	0.2302	0.486331	1093.39	1093.39
AIMP1	44949.6	0.325779	0.671099	1.14727	1.14727	0.379932	0.760402	0.877002	-1.14025	0.74577	0.890885	1.04742	1.04742
AIMP2	36262.7	0.853832	0.978203	1.02934	1.02934	0.572919	0.882901	0.912817	-1.09551	0.909641	0.966995	0.982138	-1.01819
AIP	20092	0.153145	0.452466	0.774739	-1.29076	0.561461	0.877159	0.90496	-1.10502	0.26813	0.530257	0.822747	-1.21544
AIPL1	20	0.377708	0.720096	2.32603	2.32603	0.841439	0.990185	0.322744	-3.09843	0.331537	0.593004	2.21989	2.21989
AIRN	18	0.136	0.420369	4.6514	4.6514	0.110814	0.409111	6.58528	6.58528	0.149281	0.380129	4.95786	4.95786
AJAP1	582.999	0.919937	0.995583	0.491407	-2.03497	0.88994	1	0.376214	-2.65806	0.171278	0.413611	190.596	190.596
AJUBA	22864	0.29275	0.637253	0.810662	-1.23356	0.802181	0.97852	1.04769	1.04769	0.704164	0.870398	0.929331	-1.07604
AK1	3866	0.873781	0.983879	1.0987	1.0987	0.932573	1	0.949354	-1.05335	0.0527656	0.187063	2.65162	2.65162
AK2	164960	0.230502	0.569122	0.915882	-1.09184	0.624037	0.905505	0.965185	-1.03607	0.00530347	0.0330891	0.80962	-1.23515
AK3	72953.7	4.60419e-45	2.81158e-42	1.43078	1.43078	4.21462e-19	6.80644e-17	0.791896	-1.26279	0.000260618	0.00267757	1.09732	1.09732
AK4	63615	0.000847576	0.00915054	1.5649	1.5649	2.19993e-06	6.26659e-05	1.85136	1.85136	0.000306658	0.00309365	1.61821	1.61821
AK5	847.003	0.982631	1	0.994609	-1.00542	0.965761	1	1.03986	1.03986	0.17841	0.423603	27.7302	27.7302
AK6	23713.7	0.400033	0.7381	1.1761	1.1761	0.590212	0.891086	0.8949	-1.11744	0.798855	0.918369	1.05172	1.05172
AK7	2106	0.667489	0.89967	0.725265	-1.37881	0.60091	0.895447	1.39496	1.39496	0.652448	0.840275	1.33634	1.33634
AK8	407	0.672821	0.902455	1.04365	1.04365	0.973106	1	1.00026	1.00026	0.00822496	0.0467221	1.54151	1.54151
AK9	4168.01	0.381402	0.723377	1.40025	1.40025	0.578871	0.886296	0.790991	-1.26424	0.00380261	0.0252315	2.75687	2.75687
AKAP1	87054	0.000849703	0.00916844	1.41352	1.41352	0.448813	0.811384	1.08689	1.08689	0.0370318	0.14493	1.24877	1.24877
AKAP10	21957	0.0892926	0.323603	0.934361	-1.07025	0.766551	0.967093	1.0126	1.0126	0.487127	0.729061	0.972901	-1.02785
AKAP11	86565	0.0509209	0.223355	1.22651	1.22651	0.663266	0.92397	0.952765	-1.04958	0.00934764	0.0514542	1.30739	1.30739
AKAP12	272947	0.0149852	0.0921414	1.18378	1.18378	1.71393e-45	1.97011e-42	2.36915	2.36915	8.48013e-09	2.43692e-07	1.46445	1.46445
AKAP13	101100	0.934626	0.999715	1.00782	1.00782	0.756907	0.964998	1.02966	1.02966	0.545524	0.771632	0.94332	-1.06009
AKAP14	27	0.109926	0.370093	3.34728	3.34728	0.879125	0.99681	0.912632	-1.09573	0.0696155	0.22718	3.40965	3.40965
AKAP17A	42335.7	0.715307	0.925438	1.05327	1.05327	0.896872	1	1.01877	1.01877	0.941764	0.980857	1.0107	1.0107
AKAP2	13724.4	0.113412	0.377302	0.7006	-1.42735	0.00603355	0.0506016	0.504535	-1.98202	9.60769e-05	0.00114605	0.318304	-3.14165
AKAP3	1884	0.506607	0.810712	0.66645	-1.50049	0.487555	0.835945	0.656802	-1.52253	0.839302	0.937466	0.892908	-1.11994
AKAP5	7361	0.137204	0.422887	1.25564	1.25564	0.371681	0.753909	0.868423	-1.15151	0.00107513	0.00890973	1.62245	1.62245
AKAP6	8089	0.849488	0.976941	1.19832	1.19832	0.590192	0.891086	0.570336	-1.75335	0.0481807	0.175301	15.1114	15.1114
AKAP7	5385.99	0.000952858	0.010092	1.23702	1.23702	7.06283e-05	0.00129227	1.28776	1.28776	5.17948e-06	8.62781e-05	1.33762	1.33762
AKAP8	36665	0.854906	0.97848	0.982444	-1.01787	0.383115	0.763457	0.916903	-1.09063	0.180637	0.426927	0.874337	-1.14372
AKAP8L	40890.7	0.59828	0.862543	0.977214	-1.02332	0.345674	0.729681	0.959731	-1.04196	0.349652	0.61218	1.04047	1.04047
AKAP9	106871	0.851687	0.977781	1.01853	1.01853	0.147043	0.482514	1.14837	1.14837	0.005864	0.0355423	1.29174	1.29174
AKIP1	12476.4	0.292554	0.637039	1.23263	1.23263	0.227102	0.605183	1.26674	1.26674	0.101149	0.293387	1.37223	1.37223
AKIRIN1	88304.5	0.868093	0.982637	1.01729	1.01729	0.723654	0.9496	0.963675	-1.03769	0.395556	0.652558	1.09007	1.09007
AKIRIN2	29201	0.22925	0.568138	0.818597	-1.2216	0.487595	0.835945	0.893207	-1.11956	0.157184	0.391927	0.788513	-1.26821
AKNA	14689.2	0.9208	0.995721	1.02888	1.02888	0.0147194	0.101314	1.85358	1.85358	0.206634	0.462419	1.40084	1.40084
AKNAD1	751.293	2.28742e-05	0.0004257	0.310686	-3.21869	4.23029e-16	5.47444e-14	0.0830871	-12.0356	1.00154e-13	5.51299e-12	0.104839	-9.53846
AKR1A1	39031	0.75705	0.942778	1.0469	1.0469	0.883881	0.998178	0.978217	-1.02227	0.737287	0.886905	1.05076	1.05076
AKR1B1	77190	0.501108	0.807202	0.930086	-1.07517	0.244754	0.62482	0.880624	-1.13556	0.591974	0.803127	0.944099	-1.05921
AKR1B10	22.3506	0.450597	0.772888	98.0827	98.0827	1	1	1	-1	0.317447	0.578821	674.661	674.661
AKR1C1	1146.23	0.0968951	0.342106	0.00419614	-238.314	0.325821	0.712153	0.0191606	-52.1905	0.347776	0.610538	2.1533	2.1533
AKR1C2	357.343	0.404695	0.741574	0.133554	-7.48762	0.35321	0.736213	0.0481178	-20.7824	0.718907	0.879005	14.1407	14.1407
AKR1C3	241.194	0.0398874	0.18923	0.217285	-4.60224	1.18635e-05	0.000280999	0.0416509	-24.0091	0.139237	0.362922	0.424835	-2.35385
AKR1E2	31	0.503531	0.809363	0.0196434	-50.9077	0.503531	0.84377	0.0196434	-50.9077	0.659911	0.8441	19.5271	19.5271
AKR7A2	39715.3	0.375796	0.718606	1.14228	1.14228	0.948183	1	0.989945	-1.01016	0.653068	0.840312	1.07102	1.07102
AKR7A2P1	1054.54	0.603827	0.864993	1.08344	1.08344	0.511536	0.848911	1.10587	1.10587	0.495047	0.734972	0.908114	-1.10118
AKR7A3	659.395	0.461988	0.781328	1.08328	1.08328	0.00534424	0.0460052	0.691082	-1.44701	0.882723	0.955904	0.982638	-1.01767
AKR7L	1357.82	0.340796	0.685697	0.911979	-1.09652	8.0939e-06	0.000199308	0.635901	-1.57257	0.839429	0.937466	0.979587	-1.02084
AKT1	115980	0.0427314	0.198302	0.838604	-1.19246	0.105033	0.394931	0.869857	-1.14961	0.00973453	0.0531645	0.796329	-1.25576
AKT1S1	57294.3	0.00238997	0.0213838	1.47726	1.47726	0.25565	0.638107	1.16615	1.16615	0.0865443	0.263544	1.25595	1.25595
AKT2	98166.9	0.275517	0.619012	1.112	1.112	0.18704	0.550413	1.13632	1.13632	0.900832	0.962974	1.01249	1.01249
AKT3	74676.9	5.66876e-13	3.70479e-11	0.433414	-2.30726	9.37045e-07	2.93442e-05	0.600041	-1.66655	5.93788e-07	1.2357e-05	0.593435	-1.68511
AKTIP	10360	0.893134	0.990278	0.958501	-1.0433	0.381851	0.762235	1.29355	1.29355	0.456368	0.70467	1.24765	1.24765
ALAD	14096	0.349354	0.694125	1.06732	1.06732	0.19856	0.568672	1.09522	1.09522	0.0167075	0.080652	1.18126	1.18126
ALAS1	39577.7	0.0052795	0.0405689	1.58601	1.58601	0.0130286	0.0922436	1.51327	1.51327	0.00197628	0.0147963	1.66041	1.66041
ALAS2	39	0.859949	0.979833	1.09073	1.09073	0.664742	0.924667	1.26954	1.26954	0.629979	0.825709	0.905412	-1.10447
ALB	67	0.117543	0.385286	0.0167624	-59.6572	0.111319	0.409966	0.0128331	-77.9235	0.125087	0.338407	0.0227391	-43.977
ALCAM	27267	0.358227	0.70341	1.23218	1.23218	0.869549	0.995571	1.03966	1.03966	6.42916e-08	1.57434e-06	2.89578	2.89578
ALDH16A1	24485.6	0.857709	0.979086	0.968811	-1.03219	0.0384667	0.206221	0.666517	-1.50034	0.0651651	0.217376	0.700371	-1.42781
ALDH18A1	137154	0.707661	0.921095	0.970687	-1.0302	0.0590444	0.274394	0.856624	-1.16737	0.105385	0.302298	0.876402	-1.14103
ALDH1A1	1046	0.000212895	0.00285139	5.73821	5.73821	0.405458	0.78029	1.57616	1.57616	3.16063e-16	2.32188e-14	111.947	111.947
ALDH1A2	23101.3	8.1316e-16	6.84912e-14	0.24765	-4.03795	2.31945e-13	2.16863e-11	0.0226747	-44.1021	0.00142621	0.011265	0.00140904	-709.702
ALDH1A3	17372.1	0.258546	0.599422	1.32788	1.32788	0.00228059	0.0232109	2.02756	2.02756	0.814616	0.926341	1.06388	1.06388
ALDH1B1	82931	0.111181	0.372812	1.1827	1.1827	0.190895	0.557408	1.14879	1.14879	0.955442	0.985922	1.00614	1.00614
ALDH1L1	1664.01	0.300297	0.645203	0.213227	-4.68985	0.766913	0.967354	1.28126	1.28126	0.214208	0.47191	2.51521	2.51521
ALDH1L1-AS2	18	0.207042	0.53635	0.152148	-6.57253	0.961252	1	1.22125	1.22125	0.203092	0.457897	0.141244	-7.07995
ALDH1L2	966	0.622619	0.873661	1.86204	1.86204	0.953294	1	1.08819	1.08819	0.160922	0.397909	4.9656	4.9656
ALDH2	1713.02	0.496289	0.803744	4.97762	4.97762	0.967057	1	0.942077	-1.06148	0.164498	0.403624	108.614	108.614
ALDH3A1	616	0.862844	0.980757	0.960397	-1.04124	0.670602	0.927668	0.920902	-1.08589	0.148321	0.378572	1.39272	1.39272
ALDH3A2	64331.6	0.744629	0.937368	1.04151	1.04151	0.0846312	0.343888	1.23022	1.23022	0.181174	0.427626	1.17618	1.17618
ALDH3B1	1865.73	0.985905	1	0.997997	-1.00201	1.38132e-08	6.18857e-07	2.95634	2.95634	0.52971	0.761276	0.892967	-1.11986
ALDH4A1	22093.9	0.977931	1	0.995208	-1.00482	0.416812	0.787191	0.867771	-1.15238	0.344497	0.606689	0.846931	-1.18073
ALDH5A1	41693.9	0.00293546	0.0252918	1.57951	1.57951	0.901483	1	1.02117	1.02117	0.00269435	0.0191108	1.58536	1.58536
ALDH6A1	29908.8	0.0349181	0.172263	0.706259	-1.41591	0.00333387	0.0316798	0.601716	-1.66191	0.00842945	0.0476206	0.639236	-1.56437
ALDH7A1	50988.7	0.71434	0.925105	1.04866	1.04866	0.151501	0.490584	0.820056	-1.21943	0.779193	0.908031	0.963518	-1.03786
ALDH8A1	376	0.00216995	0.0198702	2.0505	2.0505	0.00711056	0.05744	1.74338	1.74338	0.00106175	0.00881479	2.31964	2.31964
ALDH9A1	54872	0.302804	0.647874	1.14156	1.14156	0.761133	0.965889	1.04074	1.04074	0.392031	0.650146	1.11696	1.11696
ALDOA	483246	0.668986	0.900493	1.02087	1.02087	8.31227e-05	0.00149322	1.20005	1.20005	0.0537338	0.189464	0.909419	-1.0996
ALDOB	10	0.818033	0.96558	3.55182	3.55182	0.441321	0.805913	0.0234409	-42.6604	0.320767	0.581889	4.95786	4.95786
ALDOC	15585.5	0.806804	0.962265	1.25185	1.25185	0.11303	0.413188	4.5048	4.5048	0.069563	0.227047	8.83197	8.83197
ALG1	19034.4	0.331537	0.6767	1.23536	1.23536	0.968652	1	0.991025	-1.00906	0.703449	0.869962	1.08905	1.08905
ALG10	11254.1	0.773505	0.948505	1.08464	1.08464	0.960897	1	0.985884	-1.01432	0.975228	0.991309	1.00888	1.00888
ALG10B	28795.9	0.755658	0.94209	1.05636	1.05636	0.643287	0.914616	0.91896	-1.08819	0.982053	0.994162	0.995984	-1.00403
ALG11	9814.57	0.868291	0.982637	1.04871	1.04871	0.77733	0.970533	1.08236	1.08236	0.607888	0.81342	1.15305	1.15305
ALG12	19588	0.538359	0.827396	1.1363	1.1363	0.839309	0.990012	0.957096	-1.04483	0.984668	0.994953	1.00434	1.00434
ALG13	50275	0.044662	0.204389	0.942663	-1.06082	2.48838e-06	6.9864e-05	0.870246	-1.1491	2.33163e-05	0.000332044	0.882832	-1.13272
ALG14	5952	0.564989	0.84286	1.23486	1.23486	0.916459	1	1.0397	1.0397	0.678931	0.855368	1.16508	1.16508
ALG1L	153.308	0.000159868	0.00222982	0.166502	-6.00595	0.00365835	0.0341226	0.265441	-3.76731	0.0819342	0.253783	0.490836	-2.03734
ALG1L2	11.8685	0.581533	0.852104	1.65558	1.65558	0.546427	0.868603	1.18398	1.18398	0.952655	0.984799	1.36201	1.36201
ALG1L9P	984.622	0.602458	0.864618	1.15109	1.15109	0.35432	0.736905	1.27752	1.27752	0.192603	0.443671	1.41038	1.41038
ALG2	22917.1	0.394841	0.733143	1.18914	1.18914	0.822277	0.985366	1.04825	1.04825	0.3721	0.633559	1.19885	1.19885
ALG3	34345.9	0.175989	0.490164	1.24612	1.24612	0.472499	0.826128	1.12694	1.12694	0.786579	0.91163	1.04692	1.04692
ALG5	19202.7	0.0651524	0.263918	1.24393	1.24393	0.549879	0.87085	1.07392	1.07392	0.16787	0.408409	1.17821	1.17821
ALG6	20361	0.0248195	0.133241	1.44004	1.44004	0.706774	0.943394	1.06699	1.06699	0.0676962	0.223001	1.35144	1.35144
ALG8	40019.7	0.171087	0.482008	1.22946	1.22946	0.765916	0.96697	0.953358	-1.04892	0.279204	0.542069	1.17923	1.17923
ALG9	20160	0.247102	0.587293	0.900156	-1.11092	0.119738	0.425806	0.866679	-1.15383	0.643984	0.835453	1.04214	1.04214
ALK	886	0.829192	0.968756	0.433364	-2.30753	0.742064	0.95768	1.37826	1.37826	0.222665	0.482574	83.7711	83.7711
ALKBH1	13226	0.375621	0.718471	1.24835	1.24835	0.929131	1	0.976759	-1.02379	0.513532	0.749547	1.17971	1.17971
ALKBH2	24306.1	0.118757	0.38813	1.32481	1.32481	0.799345	0.97852	1.04928	1.04928	0.643176	0.835096	1.09083	1.09083
ALKBH3	10437	0.023368	0.127409	1.10484	1.10484	0.443729	0.80806	1.03384	1.03384	0.463337	0.710012	1.03224	1.03224
ALKBH3-AS1	92	0.478261	0.792256	1.237	1.237	0.563636	0.878329	1.14988	1.14988	0.319238	0.58057	1.3248	1.3248
ALKBH4	11753	0.481812	0.794775	1.13584	1.13584	0.782712	0.972524	0.949422	-1.05327	0.995229	0.998653	0.998067	-1.00194
ALKBH5	97667	0.333255	0.678213	1.09934	1.09934	0.442195	0.806612	1.0785	1.0785	0.439784	0.690821	1.07893	1.07893
ALKBH6	5507.99	0.183793	0.502378	1.14761	1.14761	0.230318	0.609182	1.13136	1.13136	0.149132	0.379925	1.15709	1.15709
ALKBH7	11767	0.186987	0.506573	0.841271	-1.18868	0.179586	0.539724	1.17625	1.17625	0.718463	0.878941	0.952983	-1.04934
ALKBH8	17119	0.243305	0.583723	1.30641	1.30641	0.781699	0.972414	1.06882	1.06882	0.432792	0.68507	1.20078	1.20078
ALMS1	67833.7	0.124051	0.397846	0.838937	-1.19198	0.403379	0.779205	0.91088	-1.09784	0.0259299	0.112349	0.77077	-1.2974
ALMS1-IT1	2074	0.777496	0.949822	0.833492	-1.19977	0.703663	0.942261	1.25249	1.25249	0.469218	0.715265	0.596825	-1.67553
ALMS1P	340.334	0.0626347	0.257023	1.47753	1.47753	0.319441	0.705591	0.83266	-1.20097	0.00484179	0.0307386	1.82665	1.82665
ALOX12	1103.42	0.030848	0.156816	1.54741	1.54741	0.0105876	0.0783387	1.67467	1.67467	0.0186442	0.0874734	1.64142	1.64142
ALOX12B	1179	0.73101	0.931709	0.925901	-1.08003	0.683106	0.93248	1.11209	1.11209	0.639616	0.832472	1.13969	1.13969
ALOX12P2	14	0.282824	0.628172	5.75098	5.75098	0.876591	0.996484	2.25712	2.25712	0.262412	0.524539	5.51519	5.51519
ALOX15	119.974	5.12283e-05	0.00084122	2040.18	2040.18	0.00037961	0.00534435	90.436	90.436	3.96781e-05	0.000526375	3042.09	3042.09
ALOX15B	50	0.63914	0.883894	1.62965	1.62965	0.895056	1	0.923886	-1.08238	0.111703	0.314388	3.74425	3.74425
ALOX15P1	21.0265	0.15255	0.451536	0.269047	-3.71682	0.79443	0.977025	0.638866	-1.56527	0.629341	0.825311	2.57481	2.57481
ALOX5	261	0.000211247	0.0028332	0.254945	-3.92241	1.5922e-06	4.6928e-05	0.110037	-9.08781	0.00525517	0.0328612	0.41569	-2.40564
ALOX5AP	18	0.376174	0.718891	340.789	340.789	1	1	1	-1	0.371651	0.633334	365.13	365.13
ALOXE3	1081	0.0304398	0.15555	0.56603	-1.76669	0.112465	0.412246	0.666584	-1.50019	0.0310596	0.1281	0.563933	-1.77326
ALPK1	7048.01	0.137256	0.422979	1.54756	1.54756	0.00483025	0.0423715	0.222506	-4.49425	0.227252	0.486331	0.643956	-1.5529
ALPK2	11	0.971559	1	1.10451	1.10451	0.0787098	0.330003	0.00744998	-134.229	0.396927	0.654213	1.24052	1.24052
ALPK3	710	0.131135	0.411166	1.75522	1.75522	0.786334	0.974239	1.14087	1.14087	0.398611	0.655474	1.3557	1.3557
ALPL	6405	0.951891	1	1.02479	1.02479	0.154978	0.496707	1.67955	1.67955	0.867405	0.949418	0.933126	-1.07167
ALPPL2	28.1044	0.244122	0.584576	0.0196434	-50.9077	0.111129	0.409747	6.96922	6.96922	0.0671188	0.221707	14.3851	14.3851
ALS2	28337	0.017225	0.101844	1.40261	1.40261	0.00430484	0.0387297	1.49325	1.49325	0.000925149	0.00787041	1.58524	1.58524
ALS2CL	2420	0.269871	0.612836	0.389861	-2.56502	0.0702058	0.307668	2.65835	2.65835	0.350658	0.613062	0.474752	-2.10636
ALS2CR11	204	0.0142062	0.0884934	2.29512	2.29512	0.165681	0.516605	1.53276	1.53276	0.124456	0.337215	1.66381	1.66381
ALS2CR12	271	0.000525765	0.00610093	2.49081	2.49081	0.105147	0.395056	1.4068	1.4068	0.000428984	0.00412133	2.53685	2.53685
ALX1	6728	0.467697	0.785025	1.10421	1.10421	0.937832	1	0.986311	-1.01388	0.0186354	0.0874734	1.37013	1.37013
ALX3	1767	0.000230487	0.00306599	1.32773	1.32773	0.0725996	0.314515	1.05579	1.05579	0.000220996	0.00232426	1.3318	1.3318
ALX4	8035	0.00211079	0.0194561	3.94433	3.94433	0.239282	0.619232	0.423382	-2.36193	5.77245e-05	0.00073485	5.69102	5.69102
ALYREF	141364	0.31015	0.655496	1.08282	1.08282	0.369504	0.751491	0.929515	-1.07583	0.446949	0.696883	0.940108	-1.06371
AMACR	6421.92	0.227284	0.565315	1.32005	1.32005	0.349817	0.733051	1.24423	1.24423	0.00783805	0.0450348	1.79525	1.79525
AMBN	1354	1.6668e-05	0.000323767	78.3555	78.3555	3.3475e-06	9.14874e-05	0.00144533	-691.884	0.000125892	0.00144031	13.6723	13.6723
AMBP	10	0.976573	1	1.10451	1.10451	0.342312	0.725817	0.282564	-3.53902	0.45777	0.705687	1.01299	1.01299
AMBRA1	15723	0.652737	0.891094	0.89244	-1.12052	0.918176	1	0.974925	-1.02572	0.566231	0.785679	1.14604	1.14604
AMD1	151579	0.00572725	0.043328	0.816756	-1.22436	2.61605e-05	0.000559302	0.727406	-1.37475	1.04731e-08	2.92784e-07	0.637239	-1.56927
AMDHD1	420	0.283598	0.628963	3.41401	3.41401	0.87501	0.996263	1.0935	1.0935	0.204581	0.459878	4.24548	4.24548
AMDHD2	10111.2	0.0403591	0.190689	1.15044	1.15044	0.88008	0.997068	1.01088	1.01088	0.18693	0.436304	1.09364	1.09364
AMER1	42670	0.227811	0.565654	0.846666	-1.1811	0.00521009	0.045014	0.661275	-1.51223	0.0888833	0.268325	0.786995	-1.27066
AMER2	1465.42	0.490232	0.799167	0.203223	-4.92071	0.866062	0.995571	0.782425	-1.27808	0.0720386	0.23241	7.50385	7.50385
AMER3	1483.02	0.99803	1	0.972804	-1.02796	0.949962	1	0.496648	-2.0135	0.612071	0.816015	323.959	323.959
AMFR	74592	0.48155	0.794426	1.08132	1.08132	0.106513	0.398425	1.19154	1.19154	0.846629	0.94064	1.02202	1.02202
AMH	4634	0.861298	0.98009	0.929563	-1.07577	0.151511	0.490584	0.482444	-2.07278	0.890746	0.958392	0.944671	-1.05857
AMICA1	28	1	1	1	-1	0.502372	0.843444	48.6449	48.6449	0.293791	0.558461	894.773	894.773
AMIGO1	8544	0.168396	0.478045	1.1521	1.1521	0.463589	0.821311	0.924147	-1.08208	0.0176125	0.083943	1.27646	1.27646
AMIGO2	426.879	0.438587	0.764125	0.447325	-2.23551	0.206854	0.579271	0.104549	-9.56491	0.505571	0.743375	8.17041	8.17041
AMIGO3	5355	0.698498	0.915327	1.17265	1.17265	0.599441	0.895371	0.787803	-1.26935	0.484976	0.727559	1.32234	1.32234
AMMECR1	54838.6	0.663751	0.897147	0.947463	-1.05545	0.0553742	0.263533	0.778234	-1.28496	0.200623	0.454114	0.849156	-1.17764
AMMECR1L	36609.6	0.861214	0.98009	1.02224	1.02224	0.697083	0.940372	0.952105	-1.0503	0.757125	0.897863	0.961383	-1.04017
AMN	117	0.216247	0.549128	1.47846	1.47846	0.835118	0.988794	0.99922	-1.00078	0.171942	0.41419	1.55098	1.55098
AMN1	5979.99	0.153141	0.452466	1.81914	1.81914	0.0697295	0.306405	2.10117	2.10117	0.00904897	0.0502204	2.80306	2.80306
AMOT	42543.2	0.698135	0.915205	1.06536	1.06536	1.51004e-10	9.16389e-09	2.43917	2.43917	0.00428636	0.0278371	0.574452	-1.74079
AMOTL1	68043.3	0.0784836	0.297911	0.818334	-1.222	0.0755927	0.321432	0.816627	-1.22455	0.0890371	0.26854	0.824173	-1.21334
AMOTL2	23150.1	0.591369	0.858451	0.896461	-1.1155	0.730685	0.953158	0.932996	-1.07182	0.885299	0.956527	1.02875	1.02875
AMPD1	152	0.21116	0.542091	68.8788	68.8788	0.876613	0.996484	0.376214	-2.65806	0.409424	0.664939	2.21586	2.21586
AMPD2	43251.5	0.00839547	0.0587289	1.32477	1.32477	0.044665	0.227892	1.24196	1.24196	0.00191796	0.0144371	1.38878	1.38878
AMPD3	537	0.678125	0.905223	2.16377	2.16377	0.461768	0.819415	3.72457	3.72457	0.319384	0.580674	5.51619	5.51619
AMPH	3146.02	0.421548	0.75497	2.44504	2.44504	0.609205	0.897838	1.88393	1.88393	0.00047673	0.00452222	117.67	117.67
AMT	1627.44	0.942111	1	1.05693	1.05693	0.627185	0.906382	1.34749	1.34749	0.515599	0.751217	1.48326	1.48326
AMY2A	11.3443	0.000966924	0.0102023	0.00963471	-103.791	0.000966924	0.0114713	0.00963471	-103.791	0.180549	0.426871	3.05851	3.05851
AMY2B	2132.97	0.826243	0.968043	0.881804	-1.13404	0.591377	0.891536	0.723391	-1.38238	0.256338	0.516722	1.78922	1.78922
AMZ1	105	0.0539331	0.232166	2.04285	2.04285	0.0332606	0.185434	2.20691	2.20691	0.0553994	0.194077	1.94223	1.94223
AMZ2	40525.9	0.478437	0.792268	0.951622	-1.05084	0.371247	0.753531	0.938298	-1.06576	0.869168	0.950196	1.01169	1.01169
AMZ2P1	7205.05	0.891064	0.989317	1.0049	1.0049	0.406204	0.78111	0.970455	-1.03044	0.00293378	0.0204673	1.12202	1.12202
ANAPC1	131577	0.185158	0.504065	1.11726	1.11726	0.573579	0.883204	1.04897	1.04897	0.531708	0.762592	1.0545	1.0545
ANAPC10	5946.77	0.166892	0.476024	1.13871	1.13871	0.172219	0.526999	0.877177	-1.14002	0.126497	0.340621	1.15747	1.15747
ANAPC11	37805.9	0.0636635	0.259841	1.33502	1.33502	0.747848	0.959909	1.05426	1.05426	0.209907	0.466214	1.22048	1.22048
ANAPC13	35748.1	0.13212	0.41328	1.27231	1.27231	0.544536	0.867424	0.899993	-1.11112	0.202935	0.457698	1.22783	1.22783
ANAPC15	22555.8	0.0237893	0.129237	0.635468	-1.57364	0.284326	0.669883	0.819112	-1.22083	0.0184481	0.0868661	0.621287	-1.60956
ANAPC16	34511.3	0.298437	0.643611	1.18909	1.18909	0.605349	0.896838	1.09174	1.09174	0.204544	0.459848	1.23317	1.23317
ANAPC1P1	43.5928	0.382405	0.723947	0.726803	-1.37589	0.82969	0.987727	1.08845	1.08845	0.258923	0.519813	0.61673	-1.62145
ANAPC2	31390	0.223014	0.55898	1.22963	1.22963	0.702392	0.941677	0.933079	-1.07172	0.37123	0.63279	1.16592	1.16592
ANAPC4	20694	0.858984	0.979413	0.981257	-1.0191	0.882234	0.99749	0.98405	-1.01621	0.833888	0.93492	1.02119	1.02119
ANAPC5	156153	0.0248819	0.133503	1.18972	1.18972	0.0454475	0.230837	1.16832	1.16832	0.447165	0.697148	1.06232	1.06232
ANAPC7	64013.2	0.367996	0.712307	0.899991	-1.11112	0.169075	0.520941	0.849192	-1.17759	0.19372	0.444932	0.857179	-1.16662
ANG	2159.56	0.57779	0.850241	1.18618	1.18618	0.296635	0.68267	1.37978	1.37978	0.559211	0.781023	1.19759	1.19759
ANGEL1	30867	0.0923505	0.330748	1.33991	1.33991	0.673322	0.928518	1.08	1.08	0.245249	0.50367	1.22861	1.22861
ANGEL2	37359.9	0.0109696	0.0724666	0.911578	-1.097	0.378817	0.759105	0.968309	-1.03273	5.69885e-07	1.18998e-05	0.831874	-1.20211
ANGPT1	15378.8	0.661054	0.895816	1.1155	1.1155	0.303973	0.69061	1.28248	1.28248	0.0381791	0.148057	1.61591	1.61591
ANGPT2	188.466	0.155883	0.457443	0.679438	-1.47181	0.675168	0.928891	1.11253	1.11253	0.0838745	0.25824	1.66829	1.66829
ANGPTL1	170	0.0513282	0.224486	3.79655	3.79655	0.460702	0.818891	1.27992	1.27992	0.179647	0.425616	2.16988	2.16988
ANGPTL2	155	0.824262	0.967503	1.91632	1.91632	0.46049	0.818891	0.393514	-2.5412	0.794838	0.915905	3.32614	3.32614
ANGPTL3	59	0.569206	0.845254	0.773158	-1.2934	0.708146	0.944303	0.769419	-1.29968	0.831947	0.934135	0.955842	-1.0462
ANGPTL4	759	0.116653	0.383241	2.34715	2.34715	0.000149447	0.00246859	6.65655	6.65655	0.000640248	0.005811	5.77035	5.77035
ANGPTL5	48	0.0132504	0.084176	5.60877	5.60877	0.0289469	0.167999	3.79141	3.79141	0.290616	0.555475	1.64648	1.64648
ANGPTL6	112.028	0.116218	0.382541	1.79314	1.79314	0.0357579	0.195428	2.43574	2.43574	0.046941	0.171517	2.22133	2.22133
ANGPTL7	29	0.0049004	0.0382423	5.88487	5.88487	0.0279828	0.163618	3.03485	3.03485	0.0136291	0.0692835	3.87136	3.87136
ANK1	1889	0.632321	0.879413	2.40631	2.40631	0.95633	1	1.10584	1.10584	0.0315959	0.129639	28.5214	28.5214
ANK2	51479.2	0.449324	0.771821	1.71864	1.71864	0.661575	0.923153	0.779919	-1.28219	0.00306243	0.0211011	6.79273	6.79273
ANK3	28302.6	0.876464	0.984657	0.879087	-1.13754	0.25955	0.641439	2.61018	2.61018	0.84761	0.940917	1.57072	1.57072
ANKAR	1750	0.640058	0.884476	1.12576	1.12576	0.0213233	0.134717	1.78148	1.78148	0.1258	0.339491	1.48185	1.48185
ANKDD1A	13503	0.896898	0.991114	1.04102	1.04102	0.000160787	0.00261828	2.66694	2.66694	0.885955	0.9567	1.04539	1.04539
ANKDD1B	47	0.736268	0.934644	0.859596	-1.16334	0.114482	0.415661	0.443298	-2.25582	0.75192	0.895004	0.972688	-1.02808
ANKEF1	4112	0.142326	0.4327	0.843324	-1.18578	0.848945	0.993049	1.02511	1.02511	0.137816	0.360102	1.18848	1.18848
ANKFN1	15	1	1	1	-1	0.233997	0.61368	37.9282	37.9282	0.0158772	0.0776613	511.99	511.99
ANKFY1	96718.4	0.664114	0.897361	1.0417	1.0417	0.757635	0.965081	1.0296	1.0296	0.689117	0.862193	1.03842	1.03842
ANKH	25565.7	0.406914	0.743618	1.16487	1.16487	0.359908	0.743384	0.832517	-1.20118	0.40746	0.663183	1.16469	1.16469
ANKHD1	75612.4	0.338895	0.683901	0.900714	-1.11023	0.641245	0.914064	0.950988	-1.05154	0.320596	0.581741	0.896968	-1.11487
ANKHD1-EIF4EBP3	57331.6	0.534398	0.825703	1.08448	1.08448	0.481847	0.832568	1.0959	1.0959	0.110938	0.313089	1.22421	1.22421
ANKIB1	45287	0.422891	0.756233	1.11652	1.11652	0.12462	0.435867	1.22959	1.22959	0.191102	0.441251	1.19378	1.19378
ANKLE1	29837.7	0.650449	0.889907	0.929392	-1.07597	0.00887891	0.068362	0.622668	-1.60599	0.0837145	0.25786	0.742961	-1.34597
ANKLE2	69901	0.273693	0.616828	0.932536	-1.07235	0.0870853	0.349647	0.895709	-1.11643	0.177203	0.42182	0.917073	-1.09043
ANKMY1	5675	0.742131	0.93676	1.03686	1.03686	0.2647	0.647777	0.881188	-1.13483	0.228575	0.486331	0.877057	-1.14018
ANKMY2	18195	0.305385	0.650616	0.871383	-1.1476	0.501765	0.843444	1.09165	1.09165	0.154874	0.388297	1.20042	1.20042
ANKRA2	5874	0.785935	0.954384	0.897047	-1.11477	0.93414	1	0.968024	-1.03303	0.737217	0.886905	1.13512	1.13512
ANKRD1	141	0.672937	0.902455	0.908643	-1.10054	0.759809	0.96586	1.44362	1.44362	0.94545	0.982036	0.892911	-1.11993
ANKRD10	33381.1	0.396691	0.734906	0.870638	-1.14858	0.105354	0.395603	0.759723	-1.31627	0.742351	0.889878	0.948832	-1.05393
ANKRD11	206366	0.0473913	0.212564	0.876995	-1.14026	0.883256	0.998075	0.990625	-1.00946	0.00211952	0.0156944	0.812469	-1.23082
ANKRD12	42542.6	0.649672	0.889401	1.07435	1.07435	0.685067	0.93353	1.06626	1.06626	0.00656408	0.0390349	1.49066	1.49066
ANKRD13A	44162	0.789798	0.95504	0.988387	-1.01175	1.6608e-06	4.85834e-05	1.23203	1.23203	0.747756	0.892379	0.986066	-1.01413
ANKRD13B	38845	0.0498	0.220267	1.19281	1.19281	0.713667	0.946336	1.03454	1.03454	0.456831	0.70487	1.07041	1.07041
ANKRD13C	28736	0.878823	0.985571	1.02817	1.02817	0.821263	0.985026	0.959004	-1.04275	0.311814	0.574014	1.19475	1.19475
ANKRD13D	12320.9	0.0418203	0.195272	0.87275	-1.1458	0.198603	0.568713	1.08965	1.08965	0.259745	0.52101	1.07882	1.07882
ANKRD16	9037.84	0.524608	0.819258	1.18131	1.18131	0.975695	1	0.991755	-1.00831	0.735984	0.886347	1.09658	1.09658
ANKRD17	163596	0.452851	0.774995	1.05878	1.05878	0.550939	0.870864	1.04655	1.04655	0.210611	0.466985	1.099	1.099
ANKRD18A	12308.3	0.204959	0.533231	0.699207	-1.43019	0.591163	0.891536	1.1425	1.1425	0.174638	0.417869	0.679468	-1.47174
ANKRD18B	19376.2	0.758712	0.942778	1.0365	1.0365	0.000524796	0.00692441	1.47075	1.47075	0.389253	0.648268	1.1059	1.1059
ANKRD18DP	1814	0.00628376	0.0467775	1.93348	1.93348	0.00429883	0.0386934	2.02046	2.02046	0.00778603	0.0448414	1.90118	1.90118
ANKRD19P	21586.1	0.0278822	0.145602	1.5446	1.5446	0.150188	0.48816	1.33965	1.33965	0.0353819	0.140614	1.51868	1.51868
ANKRD2	12	0.796408	0.957699	5.74075	5.74075	0.964949	1	0.745038	-1.34221	0.46047	0.707616	2.85416	2.85416
ANKRD20A1	1703.07	0.229496	0.568244	3.20154	3.20154	0.495271	0.840446	0.313184	-3.19301	0.042167	0.159094	6.33658	6.33658
ANKRD20A11P	386.105	0.000413775	0.00500156	2.86777	2.86777	0.0444801	0.227297	1.77941	1.77941	2.88499e-05	0.000398517	3.54002	3.54002
ANKRD20A12P	1230.94	0.717868	0.926006	1.27852	1.27852	0.619471	0.902489	1.39868	1.39868	0.927756	0.974979	1.05356	1.05356
ANKRD20A19P	387	0.208543	0.538612	1.443	1.443	1.96538e-13	1.86435e-11	0.0488585	-20.4673	0.562756	0.783584	0.854997	-1.16959
ANKRD20A2	1923.51	0.178161	0.493332	5.48087	5.48087	0.584995	0.888802	0.240884	-4.15137	0.0234504	0.104123	15.1606	15.1606
ANKRD20A3	3964.66	0.141375	0.430931	2.08118	2.08118	0.729307	0.952569	0.81079	-1.23336	0.0872134	0.265031	2.3138	2.3138
ANKRD20A4	2187.36	0.720646	0.927433	1.17712	1.17712	0.940093	1	1.03454	1.03454	0.665741	0.846845	1.23233	1.23233
ANKRD20A5P	4201.94	0.69886	0.915408	1.17328	1.17328	0.831987	0.988057	1.09083	1.09083	0.577281	0.793351	1.25256	1.25256
ANKRD20A8P	613.479	0.00831909	0.0582665	2.18975	2.18975	0.280884	0.665601	0.704239	-1.41997	0.000500997	0.00471806	2.79427	2.79427
ANKRD20A9P	4508.78	0.563017	0.841995	1.30462	1.30462	0.803827	0.97932	1.1247	1.1247	0.37983	0.640512	1.4807	1.4807
ANKRD22	10	1	1	1	-1	1	1	1	-1	0.2302	0.486331	332.027	332.027
ANKRD23	4656	0.608403	0.8671	1.24028	1.24028	0.852349	0.993586	0.919625	-1.0874	0.822241	0.929182	0.903575	-1.10672
ANKRD24	2379	0.299099	0.644115	2.80443	2.80443	0.117172	0.420903	4.40505	4.40505	0.0325436	0.132376	7.05329	7.05329
ANKRD26	33093.4	0.624397	0.874722	0.922267	-1.08428	0.533849	0.861789	0.901727	-1.10898	0.746908	0.891699	0.948416	-1.05439
ANKRD26P1	48	0.404404	0.741357	1.55839	1.55839	0.516794	0.851799	1.51947	1.51947	0.233653	0.489948	2.23908	2.23908
ANKRD27	45333	0.0976393	0.343222	0.789111	-1.26725	0.794648	0.977109	1.03526	1.03526	0.0367735	0.144151	0.737594	-1.35576
ANKRD28	42511.8	0.787637	0.95485	0.96238	-1.03909	0.530163	0.859284	1.09019	1.09019	0.766175	0.901097	0.958454	-1.04335
ANKRD29	950	0.253839	0.594757	25.5307	25.5307	0.401698	0.777759	11.7624	11.7624	0.234693	0.490883	29.0015	29.0015
ANKRD30A	183.792	0.0344455	0.170534	0.000125634	-7959.6	0.0896137	0.355916	0.0120973	-82.6629	0.106038	0.303603	0.0283719	-35.2462
ANKRD30B	21	0.644309	0.887149	0.331891	-3.01304	0.761645	0.965889	0.161909	-6.17631	0.400083	0.656763	1.40461	1.40461
ANKRD30BL	3590.96	0.54086	0.828934	1.33478	1.33478	0.720506	0.94862	0.827028	-1.20915	0.719491	0.879547	0.826423	-1.21003
ANKRD31	460	0.28673	0.631536	1.19725	1.19725	0.263184	0.645119	1.21199	1.21199	0.265665	0.527576	0.810109	-1.2344
ANKRD32	16481	0.917658	0.995401	0.989529	-1.01058	0.0346001	0.191049	0.798801	-1.25188	0.863906	0.948058	1.01788	1.01788
ANKRD33B	13080	0.753448	0.941117	0.919556	-1.08748	0.862594	0.995222	1.04575	1.04575	0.800433	0.919047	0.935014	-1.0695
ANKRD34A	2028	0.629035	0.877622	1.44487	1.44487	0.413667	0.786012	1.80933	1.80933	0.224673	0.485035	2.33214	2.33214
ANKRD34B	2911	0.00861837	0.0598052	0.346493	-2.88606	0.14049	0.469687	1.53356	1.53356	0.685461	0.859373	1.12894	1.12894
ANKRD35	22	0.185686	0.50508	3.92993	3.92993	0.187848	0.551908	4.48867	4.48867	0.101301	0.293741	8.75673	8.75673
ANKRD36	14948	0.776051	0.949396	1.07931	1.07931	0.265769	0.649255	1.3295	1.3295	0.203863	0.45899	1.38069	1.38069
ANKRD36B	15136.2	0.662429	0.896559	0.891234	-1.12204	0.41685	0.787191	1.21942	1.21942	0.63311	0.8276	1.12613	1.12613
ANKRD36BP1	12025	0.778726	0.950711	1.08006	1.08006	0.826831	0.987506	1.06205	1.06205	0.828355	0.932263	0.940326	-1.06346
ANKRD36BP2	45.7729	0.581611	0.852104	0.0220356	-45.381	0.903394	1	2.62215	2.62215	0.672327	0.851107	30.3027	30.3027
ANKRD37	1805.44	0.809891	0.963067	1.2408	1.2408	0.0701477	0.30753	3.93631	3.93631	0.512966	0.749001	1.73403	1.73403
ANKRD39	6642	0.00219682	0.0200505	1.19697	1.19697	0.0205781	0.131111	1.14652	1.14652	0.00670913	0.0397402	1.17346	1.17346
ANKRD40	77340.4	0.204339	0.532185	1.1468	1.1468	0.597931	0.894584	0.94204	-1.06153	0.443309	0.693921	1.08737	1.08737
ANKRD42	7803.07	0.356645	0.702011	1.17675	1.17675	0.103663	0.391814	1.32491	1.32491	0.14028	0.364765	1.29209	1.29209
ANKRD44	5898	0.97502	1	1.01349	1.01349	0.827819	0.987506	1.09181	1.09181	0.476666	0.721329	1.31727	1.31727
ANKRD44-IT1	22	0.921094	0.995721	0.904613	-1.10544	0.491659	0.83845	1.38986	1.38986	0.785786	0.911277	1.02686	1.02686
ANKRD45	267	0.00133651	0.0132977	5.07223	5.07223	0.000402686	0.00560462	6.82357	6.82357	4.93308e-07	1.04552e-05	13.2379	13.2379
ANKRD46	16808.9	0.229381	0.568196	0.751812	-1.33012	0.0112115	0.0818396	0.506645	-1.97377	0.538056	0.766674	1.14006	1.14006
ANKRD49	8806	0.829441	0.96891	0.936393	-1.06793	0.586574	0.889506	0.843032	-1.18619	0.756128	0.89717	0.909208	-1.09986
ANKRD50	59693.4	1.57262e-15	1.31327e-13	0.298684	-3.34802	0.876858	0.996484	1.01599	1.01599	1.13693e-11	4.93706e-10	0.3959	-2.52589
ANKRD52	134495	1.19593e-05	0.000240925	1.44904	1.44904	0.415007	0.786352	1.07655	1.07655	3.65722e-05	0.000489157	1.42067	1.42067
ANKRD53	96	0.126444	0.401893	0.808756	-1.23647	0.00389095	0.0357803	0.499878	-2.00049	0.0265483	0.114143	0.672935	-1.48603
ANKRD54	17570.9	0.913062	0.994595	0.975042	-1.0256	0.936078	1	1.01862	1.01862	0.760046	0.898775	1.07179	1.07179
ANKRD55	31	1	1	1	-1	1	1	1	-1	0.2302	0.486331	1027.18	1027.18
ANKRD6	31595.9	0.0640122	0.260759	0.713527	-1.40149	0.545732	0.868297	1.1031	1.1031	0.7038	0.870165	0.937736	-1.0664
ANKRD61	1171	0.943246	1	0.964493	-1.03681	0.759603	0.965756	1.17911	1.17911	0.624871	0.822762	0.757833	-1.31955
ANKRD62	122.675	0.374935	0.718064	1.47731	1.47731	0.766142	0.967006	1.02388	1.02388	0.781931	0.909329	1.13377	1.13377
ANKRD62P1-PARP4P3	328.672	0.0069893	0.0510381	1.96554	1.96554	0.326157	0.712505	1.23491	1.23491	0.0199787	0.0920839	1.76447	1.76447
ANKRD63	554	0.190315	0.511124	0.395139	-2.53076	0.271418	0.655512	1.90681	1.90681	0.401116	0.657679	0.573179	-1.74465
ANKRD65	326	0.001448	0.0142045	0.482322	-2.0733	0.508932	0.846482	1.16092	1.16092	0.00238512	0.0172749	0.493757	-2.02529
ANKRD9	11952	0.461065	0.780761	1.22741	1.22741	0.602489	0.895644	1.15802	1.15802	0.760847	0.898939	1.09096	1.09096
ANKS1A	39107	0.972158	1	1.00416	1.00416	0.719827	0.948552	1.04326	1.04326	0.862621	0.947489	0.979777	-1.02064
ANKS1B	1530.24	0.000383485	0.00469823	12.238	12.238	0.0501821	0.246198	4.19492	4.19492	4.49183e-07	9.5824e-06	34.5507	34.5507
ANKS3	12555	0.675448	0.903913	1.11314	1.11314	0.733198	0.954291	0.912401	-1.09601	0.875562	0.95277	1.0414	1.0414
ANKS4B	17.0009	0.623437	0.874394	0.742661	-1.34651	0.254729	0.637017	1.8971	1.8971	0.592881	0.803934	1.57524	1.57524
ANKS6	51688	0.201035	0.527376	1.18002	1.18002	0.619456	0.902489	0.934202	-1.07043	0.928641	0.975209	0.987975	-1.01217
ANKUB1	73	0.000163595	0.0022753	0.21732	-4.6015	0.000262163	0.00389576	3.87288	3.87288	0.0141563	0.0712225	1.58019	1.58019
ANKZF1	18858.7	0.123959	0.397744	0.708517	-1.4114	0.402228	0.777904	1.17935	1.17935	0.253431	0.513991	0.779474	-1.28292
ANLN	83325.6	0.00765948	0.0546454	1.15289	1.15289	0.030356	0.174006	1.12306	1.12306	6.27807e-08	1.5412e-06	1.32691	1.32691
ANO1	55	0.197061	0.521642	2.33392	2.33392	0.0425689	0.22094	12.2882	12.2882	0.0520666	0.185224	9.88712	9.88712
ANO10	16669.9	0.0129016	0.0824025	1.3774	1.3774	4.36789e-05	0.000873623	1.6696	1.6696	0.000941074	0.00798603	1.52513	1.52513
ANO2	96	1	1	1	-1	1	1	1	-1	0.2302	0.486331	3178.86	3178.86
ANO3	47	0.35083	0.695856	151.522	151.522	0.469838	0.824047	37.9282	37.9282	0.0726326	0.233747	1448.19	1448.19
ANO4	5164.99	0.000123842	0.00178203	0.133631	-7.48328	0.00145696	0.0159677	0.306136	-3.26652	0.000260021	0.00267284	0.050805	-19.6831
ANO5	27592	0.439645	0.764896	1.15877	1.15877	0.321584	0.707892	1.20596	1.20596	0.196352	0.44892	1.27279	1.27279
ANO6	52466.4	0.270397	0.613258	0.868858	-1.15094	0.829126	0.987506	0.973592	-1.02712	0.216906	0.47551	0.85363	-1.17147
ANO7	2164	0.800792	0.959853	1.16277	1.16277	0.433286	0.799514	1.55384	1.55384	0.761993	0.899377	1.20419	1.20419
ANO8	21069.6	0.299471	0.644347	1.26466	1.26466	0.0887173	0.353696	1.4535	1.4535	0.028591	0.120435	1.60294	1.60294
ANO9	132	0.00109591	0.0112889	0.124051	-8.06121	0.607803	0.897399	0.850466	-1.17583	0.0534621	0.188779	0.431578	-2.31708
ANP32A	372832	1.98142e-06	4.77423e-05	0.788998	-1.26743	0.0399945	0.211625	0.906119	-1.10361	0.000336219	0.00335549	0.838868	-1.19208
ANP32A-IT1	2711	0.805543	0.961407	0.870055	-1.14935	0.786369	0.974239	0.857194	-1.1666	0.773819	0.90519	0.849098	-1.17772
ANP32AP1	22136.9	0.28436	0.62982	0.80367	-1.24429	0.806193	0.979593	0.953244	-1.04905	0.614879	0.817593	0.905423	-1.10446
ANP32B	275356	0.685743	0.90842	1.02359	1.02359	0.431479	0.798305	1.04612	1.04612	0.403292	0.659475	0.952141	-1.05026
ANP32C	5855.39	9.68519e-06	0.000200486	0.813744	-1.22889	0.625322	0.905865	0.981984	-1.01835	0.00580115	0.0352927	0.892518	-1.12043
ANP32D	145.502	0.885281	0.987458	1.09744	1.09744	0.602937	0.895915	1.25148	1.25148	0.0950181	0.28128	2.38905	2.38905
ANP32E	165192	1.2757e-08	4.54899e-07	0.656438	-1.52337	0.00495293	0.0432077	0.823007	-1.21506	4.56409e-10	1.58629e-08	0.626365	-1.59651
ANPEP	5222	0.0138943	0.0869939	0.265805	-3.76216	0.269861	0.653614	1.42652	1.42652	0.00489938	0.0310538	0.129869	-7.70005
ANTXR1	47720.2	0.00417794	0.0336248	0.700841	-1.42686	2.08023e-10	1.24693e-08	0.381613	-2.62046	3.40907e-05	0.000459742	0.579878	-1.7245
ANTXR2	5253.01	0.96811	1	1.01581	1.01581	0.228726	0.607312	0.625204	-1.59948	0.800565	0.919145	1.08934	1.08934
ANTXRL	14	0.053601	0.231116	598.19	598.19	0.37778	0.758265	48.6449	48.6449	0.383142	0.643046	45.9907	45.9907
ANXA1	130158	0.0730617	0.285084	1.4362	1.4362	3.65237e-83	1.42742e-79	21.4992	21.4992	0.000119373	0.00137702	2.06824	2.06824
ANXA10	31	0.000107492	0.0015817	687.11	687.11	0.000225877	0.00344026	207.074	207.074	0.000142207	0.00159065	433.897	433.897
ANXA11	52601.5	0.433463	0.761524	0.89748	-1.11423	0.0255636	0.154036	1.32436	1.32436	0.445269	0.69544	0.900033	-1.11107
ANXA2	188210	2.96464e-15	2.38404e-13	1.83758	1.83758	9.49918e-11	5.9686e-09	1.66247	1.66247	1.28399e-12	6.28833e-11	1.73768	1.73768
ANXA2P1	6555.66	0.00165961	0.0158895	1.94168	1.94168	0.0152935	0.104383	1.68584	1.68584	0.000534817	0.00499659	2.06205	2.06205
ANXA2P2	159552	1.47755e-13	1.03117e-11	1.86254	1.86254	1.54125e-09	7.90487e-08	1.67866	1.67866	8.24994e-12	3.62274e-10	1.78523	1.78523
ANXA2P3	343.489	0.0604872	0.250951	4.91211	4.91211	0.198291	0.568152	2.93453	2.93453	0.027719	0.117572	7.52764	7.52764
ANXA2R	2612	0.648923	0.889184	1.08789	1.08789	0.380438	0.760686	1.16476	1.16476	0.762706	0.899377	1.05103	1.05103
ANXA3	64	0.880577	0.985892	3.437	3.437	0.598472	0.89493	0.0234409	-42.6604	0.645792	0.836388	46.581	46.581
ANXA4	19842	0.328152	0.673645	0.911964	-1.09653	4.76169e-07	1.60152e-05	1.5618	1.5618	0.267238	0.529302	0.900848	-1.11007
ANXA5	82108	0.0030654	0.0262263	0.722396	-1.38428	0.779676	0.971576	1.02833	1.02833	0.0732001	0.234954	0.827491	-1.20847
ANXA6	82215.7	0.709933	0.922227	0.961032	-1.04055	0.417668	0.787484	1.08763	1.08763	0.658308	0.842971	0.953762	-1.04848
ANXA7	52701.7	0.346931	0.691702	1.13607	1.13607	0.0715275	0.311573	1.26911	1.26911	0.240807	0.49911	1.17107	1.17107
ANXA9	1519	0.066134	0.266789	1.40021	1.40021	0.258181	0.640069	1.22904	1.22904	0.0172337	0.0826011	1.56864	1.56864
AOAH	23	0.485501	0.796162	49.5413	49.5413	0.154187	0.495391	233.286	233.286	0.308347	0.571168	530.643	530.643
AOC1	24	0.852967	0.97811	1.52758	1.52758	0.159059	0.504031	0.197149	-5.07231	0.533103	0.763137	2.61282	2.61282
AOC2	2773.99	0.0973701	0.342859	1.65226	1.65226	0.447628	0.81062	1.26633	1.26633	0.107853	0.307045	1.64083	1.64083
AOC3	1264.36	0.0208435	0.117223	2.7246	2.7246	0.129779	0.447482	1.92835	1.92835	0.0709421	0.23005	2.16936	2.16936
AOX1	278	0.532356	0.824373	7.62605	7.62605	0.384434	0.764993	0.557678	-1.79315	0.266187	0.528284	62.42	62.42
AP1AR	36265.4	9.41436e-09	3.4322e-07	2.53221	2.53221	0.405428	0.78029	0.844999	-1.18343	0.00938674	0.0516403	1.57619	1.57619
AP1B1	103975	0.850431	0.977545	1.01814	1.01814	0.185407	0.547205	1.13097	1.13097	0.873071	0.95192	0.984766	-1.01547
AP1G1	127822	9.7933e-05	0.00146869	1.11567	1.11567	2.22154e-10	1.32351e-08	1.19397	1.19397	1.17795e-12	5.78352e-11	1.21928	1.21928
AP1G2	18523	0.0126425	0.0809722	0.586361	-1.70543	0.699572	0.941225	1.07325	1.07325	0.208333	0.464837	0.779603	-1.2827
AP1M1	53166.5	2.56198e-06	6.03924e-05	1.23506	1.23506	0.0217411	0.136474	1.11001	1.11001	1.11092e-05	0.000171473	1.21826	1.21826
AP1M2	222.014	0.73958	0.935741	0.613931	-1.62885	0.0841538	0.34304	18.6587	18.6587	0.865992	0.948668	0.941285	-1.06238
AP1S1	31575	0.89263	0.990229	0.975774	-1.02483	0.203443	0.575197	1.24378	1.24378	0.29297	0.557525	1.19945	1.19945
AP1S2	18321.1	0.765464	0.944708	0.935559	-1.06888	0.124198	0.434992	0.688107	-1.45326	0.608547	0.813547	1.11568	1.11568
AP1S3	11949	0.13561	0.41947	1.48401	1.48401	0.712794	0.946036	1.10846	1.10846	0.149381	0.380134	1.46565	1.46565
AP2A1	77829.8	3.62432e-05	0.000626751	1.42758	1.42758	6.84465e-05	0.00125824	1.41052	1.41052	1.05991e-06	2.06465e-05	1.51653	1.51653
AP2A2	67974.3	0.163366	0.469694	0.947586	-1.05531	4.19358e-11	2.81963e-09	1.27864	1.27864	0.41152	0.666847	0.968673	-1.03234
AP2B1	283982	0.0113909	0.0745236	1.16826	1.16826	4.78813e-13	4.2337e-11	1.52194	1.52194	4.8668e-05	0.00063486	1.27722	1.27722
AP2M1	176735	0.46486	0.783225	1.05582	1.05582	0.887384	0.999357	1.01069	1.01069	0.00427237	0.0277917	1.22753	1.22753
AP2S1	53811.7	0.617929	0.871346	1.06668	1.06668	0.988104	1	1.00194	1.00194	0.821473	0.929057	1.02989	1.02989
AP3B1	65755.7	0.14429	0.436367	0.839904	-1.19061	0.719842	0.948552	0.959462	-1.04225	0.413837	0.668661	0.908816	-1.10033
AP3B2	3281.98	0.506919	0.810814	0.44073	-2.26896	0.682247	0.932141	1.44676	1.44676	0.00457611	0.0293284	8.67328	8.67328
AP3D1	174195	0.0135973	0.0856467	1.20101	1.20101	0.102229	0.388952	1.13087	1.13087	0.0144906	0.0724719	1.19905	1.19905
AP3M1	95942.4	0.171344	0.482315	1.1427	1.1427	0.86762	0.995571	1.01685	1.01685	0.353141	0.615422	1.09575	1.09575
AP3M2	32458.7	0.92207	0.995914	1.01209	1.01209	0.72222	0.949251	1.04381	1.04381	0.442127	0.69322	1.09657	1.09657
AP3S1	40657	0.177216	0.492068	1.23209	1.23209	0.297248	0.683364	1.17693	1.17693	0.243322	0.501718	1.1991	1.1991
AP3S2	33829.7	0.284161	0.629711	0.963959	-1.03739	0.225569	0.603648	0.959026	-1.04272	0.954165	0.985795	1.00228	1.00228
AP4B1	13516.2	0.038748	0.185444	1.15705	1.15705	0.408218	0.782672	1.05929	1.05929	0.0270188	0.115498	1.16745	1.16745
AP4B1-AS1	1581.8	0.245848	0.586368	1.06306	1.06306	0.295016	0.681426	1.05577	1.05577	0.42176	0.675456	1.04204	1.04204
AP4E1	30117	6.33135e-32	1.69481e-29	1.3823	1.3823	0.000117131	0.00200954	1.10716	1.10716	0.198525	0.451314	0.966926	-1.03421
AP4M1	8289.68	2.43827e-14	1.81856e-12	1.43316	1.43316	6.77472e-13	5.85774e-11	1.38767	1.38767	1.06019e-17	9.20766e-16	1.54528	1.54528
AP4S1	6942.99	0.329423	0.674834	1.29973	1.29973	0.295706	0.682153	1.32477	1.32477	0.0617125	0.209617	1.62682	1.62682
AP5B1	50482.5	0.875939	0.984285	0.979157	-1.02129	0.804874	0.97932	1.03343	1.03343	0.651529	0.839644	0.940292	-1.0635
AP5M1	24607.8	0.00233863	0.0210789	0.531205	-1.88251	0.652449	0.919188	0.92351	-1.08283	0.052918	0.187402	0.690159	-1.44894
AP5S1	5796	5.51317e-08	1.79555e-06	1.38177	1.38177	0.00878428	0.0677937	1.16664	1.16664	1.59972e-07	3.62277e-06	1.36567	1.36567
AP5Z1	15375	0.422484	0.756033	1.21702	1.21702	0.878455	0.996684	1.0396	1.0396	0.604628	0.811072	1.13737	1.13737
APAF1	54513	0.629425	0.877659	0.938267	-1.06579	0.194922	0.563736	1.17586	1.17586	0.37178	0.633437	0.887202	-1.12714
APBA1	20772	0.000129347	0.00185137	0.0933688	-10.7102	0.88442	0.998178	1.07613	1.07613	0.902087	0.963674	1.12545	1.12545
APBA2	47683.9	0.56756	0.843978	1.08338	1.08338	0.43648	0.802211	0.891819	-1.1213	0.212602	0.469589	1.18643	1.18643
APBA3	10533	0.413235	0.748839	1.26511	1.26511	0.510046	0.847518	1.21045	1.21045	0.660067	0.844245	1.13881	1.13881
APBB1	48950.6	0.197347	0.522	0.828402	-1.20714	0.897248	1	1.01803	1.01803	0.304414	0.567637	1.14807	1.14807
APBB1IP	31	0.000361846	0.00447521	295.513	295.513	0.000449337	0.00607646	217.791	217.791	0.000216429	0.00228361	710.606	710.606
APBB2	74448.9	1.79581e-05	0.000347101	1.72376	1.72376	6.96802e-12	5.13819e-10	2.29464	2.29464	1.10874e-05	0.000171407	1.74495	1.74495
APBB3	762	0.515385	0.814484	7.92949	7.92949	0.495176	0.840446	0.808662	-1.23661	0.24408	0.50243	265.967	265.967
APC	95688.1	0.00999095	0.0672059	1.30477	1.30477	0.654946	0.91954	0.951491	-1.05098	8.15171e-07	1.62378e-05	1.62728	1.62728
APC2	15661	0.128415	0.405784	2.42787	2.42787	0.0907468	0.358384	2.63076	2.63076	9.73557e-05	0.00115778	11.7151	11.7151
APCDD1	326	0.14631	0.440086	0.0853117	-11.7217	0.0911033	0.359428	0.0355412	-28.1363	0.27659	0.538693	0.437071	-2.28796
APCDD1L	38	0.230801	0.569194	0.557203	-1.79468	0.0853095	0.345141	0.308201	-3.24464	0.0714581	0.231224	0.282168	-3.54399
APCDD1L-AS1	48	0.760114	0.942958	0.851096	-1.17496	0.979578	1	0.98125	-1.01911	0.131059	0.348157	0.432585	-2.31168
APEH	70421	0.0575059	0.243145	0.80533	-1.24173	0.744281	0.958662	1.03543	1.03543	0.00466519	0.0298124	0.716516	-1.39564
APELA	7702	0.000350442	0.00436178	0.280632	-3.56338	0.000176056	0.00281993	0.0364558	-27.4305	0.0268732	0.115008	0.535407	-1.86774
APEX1	158418	0.824494	0.967503	1.01694	1.01694	0.903552	1	0.990802	-1.00928	0.585403	0.798887	0.958921	-1.04284
APEX2	44664.4	0.43419	0.761839	1.11567	1.11567	0.839512	0.990012	0.971103	-1.02976	0.661099	0.844523	0.937967	-1.06614
APH1A	68212.1	0.4541	0.775803	1.09131	1.09131	0.737259	0.956096	1.04041	1.04041	0.549566	0.773875	1.07266	1.07266
APH1B	35007.4	0.0990023	0.346379	1.34052	1.34052	0.000937785	0.011215	1.74681	1.74681	0.0731019	0.234794	1.37269	1.37269
API5	150076	0.089932	0.325316	0.876583	-1.14079	0.59693	0.893976	0.960684	-1.04092	0.0140853	0.0709752	0.823705	-1.21403
APIP	20711.1	0.380385	0.722362	0.838902	-1.19203	0.0998314	0.382533	0.707689	-1.41305	0.182729	0.429895	0.760159	-1.31551
APITD1	11997.3	0.536187	0.826438	1.083	1.083	0.541952	0.866698	0.922879	-1.08357	0.409013	0.664607	1.11049	1.11049
APITD1-CORT	1537.22	0.691829	0.911539	1.10283	1.10283	0.214084	0.588046	0.718939	-1.39094	0.595538	0.805635	1.13746	1.13746
APLF	1524	0.0612684	0.253117	1.64569	1.64569	0.409864	0.783982	1.25042	1.25042	0.00285882	0.0200951	2.15519	2.15519
APLN	7712	0.31674	0.661545	1.40265	1.40265	0.86864	0.995571	1.06129	1.06129	0.761346	0.899266	1.11421	1.11421
APLNR	15	0.817205	0.965095	5.74075	5.74075	0.55201	0.871531	0.0196434	-50.9077	0.826863	0.931844	5.22164	5.22164
APLP1	35986.6	0.835673	0.971466	1.08804	1.08804	0.0546044	0.261269	2.16073	2.16073	0.000130466	0.00148223	5.27447	5.27447
APLP2	217315	0.388369	0.728608	0.943607	-1.05976	0.0170131	0.113542	1.1648	1.1648	0.970542	0.989945	1.00245	1.00245
APMAP	61971	0.314463	0.659115	1.13558	1.13558	0.678369	0.930442	1.05479	1.05479	0.023614	0.104707	1.31868	1.31868
APOA1	134	0.00762939	0.0545	3.09877	3.09877	0.0426681	0.221278	2.25531	2.25531	0.194403	0.445977	1.70822	1.70822
APOA1BP	33976	0.739725	0.935741	1.05927	1.05927	0.0773603	0.326148	1.33684	1.33684	0.400302	0.65684	1.15359	1.15359
APOA2	58	0.386388	0.726489	0.76356	-1.30966	0.565271	0.879525	1.2685	1.2685	0.099011	0.289092	2.22321	2.22321
APOBEC1	245	0.00829251	0.0581066	4809.86	4809.86	0.00605115	0.0506839	3748.56	3748.56	0.00722316	0.0422219	1839.58	1839.58
APOBEC2	369	0.462751	0.782021	1.64991	1.64991	0.689266	0.935993	0.800667	-1.24896	0.659829	0.844051	0.783284	-1.27668
APOBEC3A	23.1049	0.0490772	0.218008	282.497	282.497	0.241168	0.621396	127.716	127.716	0.0407515	0.155375	491.79	491.79
APOBEC3B	1256.14	0.403185	0.740057	0.560754	-1.78331	0.0143402	0.0994049	3.75128	3.75128	0.888148	0.95764	0.930052	-1.07521
APOBEC3B-AS1	32.0498	0.188074	0.507839	0.401999	-2.48757	0.579817	0.886736	3.04609	3.04609	0.824156	0.930231	0.643025	-1.55515
APOBEC3C	335.304	0.00844843	0.058961	0.383763	-2.60578	0.0220381	0.137851	2.19702	2.19702	0.120142	0.329501	0.546385	-1.83021
APOBEC3D	60.1807	0.127364	0.403595	0.37319	-2.6796	0.643177	0.914616	2.71074	2.71074	0.994585	0.998419	0.981601	-1.01874
APOBEC3F	2109.58	0.881033	0.985915	0.880667	-1.1355	0.130038	0.447767	2.79049	2.79049	0.570445	0.788391	1.52859	1.52859
APOBEC3G	23.6369	0.941392	1	0.66578	-1.502	0.261715	0.643882	5.27886	5.27886	0.369442	0.630835	2.48602	2.48602
APOBR	204	0.352525	0.698224	1.16499	1.16499	0.0427322	0.221552	1.54533	1.54533	0.00333436	0.0227027	2.47079	2.47079
APOC1	2406.68	0.936585	0.99992	1.05409	1.05409	0.484468	0.833936	1.5138	1.5138	0.935454	0.978152	1.0531	1.0531
APOC1P1	26.3183	0.944279	1	0.809015	-1.23607	0.640097	0.913294	1.24881	1.24881	0.599323	0.807848	1.75875	1.75875
APOC4-APOC2	13.3386	0.991987	1	1.07763	1.07763	0.998556	1	0.986672	-1.01351	0.614684	0.817501	0.787245	-1.27025
APOD	44	0.856977	0.978933	13.1204	13.1204	0.508405	0.846302	0.409733	-2.44062	0.735229	0.885969	5.86089	5.86089
APOE	10534	0.305039	0.650298	3.90672	3.90672	0.0287808	0.167233	10.973	10.973	0.0024655	0.0177649	53.0564	53.0564
APOF	51	0.0603887	0.250755	0.315493	-3.16964	0.272976	0.657004	0.567661	-1.76161	0.0772957	0.244052	0.412918	-2.42179
APOL1	36.0025	0.708031	0.921259	1.03573	1.03573	0.0435865	0.224433	0.256363	-3.90071	0.0907132	0.272502	2.23529	2.23529
APOL2	13183	0.159368	0.463907	1.37967	1.37967	0.251865	0.633097	1.30273	1.30273	0.12328	0.33478	1.41902	1.41902
APOL3	13.0032	0.325948	0.671322	151.522	151.522	0.445519	0.809191	37.9282	37.9282	0.0904887	0.272037	322.807	322.807
APOL4	19	0.250472	0.590906	2.43355	2.43355	0.20967	0.5833	3.10549	3.10549	0.257242	0.517929	1.88751	1.88751
APOL6	121	0.10446	0.358812	1.78771	1.78771	0.0605718	0.278568	2.06315	2.06315	0.00178765	0.0136722	8.29179	8.29179
APOLD1	4128.01	0.0120959	0.0781259	0.202176	-4.94618	0.980348	1	0.990768	-1.00932	0.0330807	0.133975	0.323732	-3.08898
APOM	1064.44	0.000175542	0.00241398	0.663294	-1.50763	0.000161385	0.00262584	0.658474	-1.51866	0.01081	0.0575897	0.764343	-1.30831
APOO	24810.1	0.324249	0.669289	1.16994	1.16994	0.441887	0.806474	1.13102	1.13102	0.303351	0.566515	1.17769	1.17769
APOOL	67148.1	0.251981	0.592963	0.882088	-1.13367	0.330858	0.715619	0.899438	-1.11181	0.0326387	0.132615	0.78557	-1.27296
APOOP5	1383.94	0.44462	0.768415	1.0975	1.0975	0.947357	1	0.9896	-1.01051	0.0182506	0.0861856	1.3318	1.3318
APOPT1	14218	0.398313	0.736497	1.24543	1.24543	0.871448	0.995659	1.04474	1.04474	0.267096	0.529129	1.32894	1.32894
APP	345275	7.54834e-10	3.30722e-08	1.41298	1.41298	0.000140415	0.00233918	1.24553	1.24553	4.41049e-17	3.60608e-15	1.58671	1.58671
APPBP2	44559.8	0.61069	0.868219	1.0766	1.0766	0.897104	1	1.01918	1.01918	0.242712	0.501197	1.18031	1.18031
APPL1	69896.9	0.60518	0.865255	1.06344	1.06344	0.0589451	0.274119	1.24211	1.24211	0.397692	0.654811	1.10486	1.10486
APPL2	26050.9	0.000159162	0.00222156	0.495292	-2.01901	0.00931966	0.0710002	0.640438	-1.56143	9.02389e-05	0.00108581	0.478569	-2.08956
APRT	61331.9	0.378341	0.720553	1.11025	1.11025	0.839959	0.990012	1.02474	1.02474	0.182502	0.429517	0.843937	-1.18492
APTR	8336.2	0.34704	0.691761	1.26503	1.26503	0.733803	0.95447	1.09122	1.09122	0.653354	0.840318	1.12454	1.12454
APTX	25735.1	0.315694	0.660349	1.2089	1.2089	0.713123	0.946036	1.07406	1.07406	0.487446	0.729061	1.1422	1.1422
AQP1	156	0.0282616	0.147152	2.96514	2.96514	0.916433	1	1.07109	1.07109	0.0423614	0.159557	2.47073	2.47073
AQP11	2812	0.187685	0.507638	1.27865	1.27865	0.166384	0.517312	1.29426	1.29426	0.0221065	0.0994437	1.53924	1.53924
AQP3	3361	0.932414	0.999359	1.04618	1.04618	0.396108	0.773854	1.51058	1.51058	0.617011	0.819424	0.751061	-1.33145
AQP4	77733.3	0.0178144	0.104319	1955.36	1955.36	0.0744627	0.318537	303.237	303.237	0.00894448	0.0497818	4272.28	4272.28
AQP4-AS1	816	1.89704e-07	5.65954e-06	40.9126	40.9126	0.165506	0.516142	3.14566	3.14566	1.70557e-09	5.41928e-08	73.4819	73.4819
AQP5	12	0.0462329	0.208966	149.889	149.889	0.258085	0.640069	48.6449	48.6449	0.0372064	0.145412	277.71	277.71
AQP6	373	0.00812875	0.0571933	1.85624	1.85624	0.000276611	0.00407672	2.32211	2.32211	0.000849008	0.00731502	2.22459	2.22459
AQP7P1	115.252	0.125375	0.399927	3.84997	3.84997	0.284503	0.670045	2.40732	2.40732	0.00524332	0.0328167	10.23	10.23
AQP7P3	49.7477	0.177266	0.492068	12.7312	12.7312	0.855131	0.994016	2.62033	2.62033	0.125721	0.339371	29.2156	29.2156
AQPEP	139	0.20337	0.53051	1.6483	1.6483	0.834269	0.98862	0.907132	-1.10238	0.284539	0.547899	1.73213	1.73213
AQR	70186	0.787995	0.95485	0.969569	-1.03139	0.993525	1	1.00095	1.00095	0.819931	0.92829	1.02615	1.02615
AR	113610	3.82706e-07	1.07295e-05	0.635488	-1.57359	0.537472	0.863791	0.952044	-1.05037	5.62778e-13	2.84166e-11	0.498794	-2.00484
ARAF	68216.6	0.0384684	0.184696	1.27644	1.27644	0.0646172	0.290807	1.24497	1.24497	0.354974	0.617514	1.11896	1.11896
ARAP1	40104.8	0.353247	0.69867	1.15444	1.15444	0.0833188	0.341399	1.29816	1.29816	0.844758	0.939494	1.03161	1.03161
ARAP2	4230	0.0439909	0.202559	1.75757	1.75757	0.794648	0.977109	1.08196	1.08196	0.292985	0.557525	1.36083	1.36083
ARAP3	5524	0.000402639	0.00488694	0.0615903	-16.2363	0.139534	0.468454	0.638063	-1.56724	0.000467865	0.0044446	0.0561479	-17.8101
ARC	1275	0.423548	0.756253	1.09308	1.09308	0.142659	0.473373	1.18241	1.18241	0.0631572	0.212932	1.24774	1.24774
ARCN1	196047	0.22263	0.558604	1.08763	1.08763	0.985151	1	1.00131	1.00131	0.142077	0.368393	1.10597	1.10597
AREG	24	0.288711	0.633525	0.290945	-3.43707	0.266787	0.650359	0.215637	-4.63742	0.550719	0.774719	3.93403	3.93403
AREL1	56203	0.0783118	0.297663	1.25062	1.25062	0.434439	0.800657	1.10756	1.10756	0.0911182	0.273341	1.23989	1.23989
ARF1	283738	0.881575	0.986026	1.00848	1.00848	0.530244	0.859284	0.964677	-1.03662	0.810373	0.924302	0.986422	-1.01376
ARF3	151453	0.828434	0.968613	1.01576	1.01576	0.231603	0.610156	1.08852	1.08852	0.443463	0.694034	1.05621	1.05621
ARF4	101687	0.595278	0.860793	0.950482	-1.0521	0.832319	0.988173	0.980115	-1.02029	0.65768	0.842834	0.95861	-1.04318
ARF5	56971	0.179288	0.494911	0.860299	-1.16239	0.467888	0.823545	0.923033	-1.08339	0.770017	0.903338	0.968427	-1.0326
ARF6	84417	0.631368	0.878619	0.957246	-1.04466	0.204033	0.575824	0.889002	-1.12486	0.234791	0.490964	0.895856	-1.11625
ARFGAP1	45369.7	0.432422	0.760768	1.11253	1.11253	0.773901	0.969639	1.04049	1.04049	0.583305	0.797433	1.07802	1.07802
ARFGAP2	51189.1	0.534443	0.825708	1.08649	1.08649	0.745017	0.959113	1.04479	1.04479	0.657325	0.842721	1.06135	1.06135
ARFGAP3	21040.1	1.01941e-13	7.24373e-12	1.44223	1.44223	3.20631e-14	3.35051e-12	1.45374	1.45374	2.7037e-24	3.91356e-22	1.64807	1.64807
ARFGEF1	63512	0.075805	0.291252	1.14296	1.14296	3.61086e-11	2.46713e-09	1.60159	1.60159	0.00622894	0.037455	1.22496	1.22496
ARFGEF2	59509	0.0717298	0.281913	1.14791	1.14791	0.0731325	0.315471	1.1472	1.1472	0.109916	0.311105	1.13062	1.13062
ARFIP1	33774.8	4.68046e-07	1.28096e-05	1.77635	1.77635	0.224802	0.602528	1.16055	1.16055	4.45787e-06	7.58148e-05	1.69397	1.69397
ARFIP2	25235.9	0.642268	0.88565	1.09159	1.09159	0.473094	0.826444	0.866309	-1.15432	0.672782	0.851107	1.0831	1.0831
ARFRP1	16855	0.440592	0.765665	1.19235	1.19235	0.56801	0.880535	0.868629	-1.15124	0.74561	0.890842	1.07869	1.07869
ARG1	20	0.232325	0.571404	0.640433	-1.56144	0.814423	0.982786	0.884767	-1.13024	0.618962	0.820273	1.14672	1.14672
ARG2	25314.1	0.00155669	0.015074	0.691876	-1.44535	0.132618	0.453772	0.845872	-1.18221	0.0233948	0.103923	0.773175	-1.29337
ARGFX	24	0.348211	0.69277	0.277914	-3.59823	0.766553	0.967093	2.58661	2.58661	0.476963	0.721485	1.26384	1.26384
ARGFXP2	269	0.685594	0.9084	1.16449	1.16449	0.822492	0.985366	1.07154	1.07154	0.528708	0.760826	1.23122	1.23122
ARGLU1	77531	0.445585	0.769209	0.920831	-1.08598	0.282949	0.668412	0.889432	-1.12431	0.670243	0.849972	0.955411	-1.04667
ARHGAP1	30961	0.082021	0.30634	1.11072	1.11072	0.00407123	0.037141	1.18688	1.18688	0.196853	0.449435	1.08138	1.08138
ARHGAP10	20071	0.443666	0.768173	1.18671	1.18671	0.161808	0.509253	1.35475	1.35475	0.0921917	0.275461	1.43526	1.43526
ARHGAP11A	138906	0.0181552	0.105738	0.824782	-1.21244	0.953318	1	0.995465	-1.00456	0.020938	0.0955026	0.828582	-1.20688
ARHGAP11B	6482.67	0.597351	0.861845	0.815051	-1.22692	0.828329	0.987506	1.08107	1.08107	0.819787	0.928234	0.918201	-1.08909
ARHGAP12	24961.9	0.383602	0.724667	1.1951	1.1951	0.414218	0.786012	1.18227	1.18227	0.0529224	0.187402	1.46117	1.46117
ARHGAP15	25	0.241495	0.581897	5.28974	5.28974	0.982547	1	0.887756	-1.12644	0.270252	0.53252	5.0048	5.0048
ARHGAP17	45751.1	0.487265	0.796986	0.905182	-1.10475	0.509973	0.847468	1.09429	1.09429	0.403894	0.660183	0.88662	-1.12788
ARHGAP18	26765	0.14131	0.430921	0.764543	-1.30797	0.6904	0.936882	0.933514	-1.07122	0.068866	0.225658	0.71262	-1.40327
ARHGAP19	62037.2	0.40081	0.738555	1.11122	1.11122	0.243084	0.622883	1.15623	1.15623	0.156955	0.391506	1.19103	1.19103
ARHGAP19-SLIT1	216.365	0.150277	0.447305	0.309598	-3.22999	0.849362	0.993137	0.851779	-1.17401	0.17851	0.423642	2.24575	2.24575
ARHGAP20	875.998	0.238811	0.578814	0.142512	-7.01694	0.325256	0.711704	0.192564	-5.19309	0.480584	0.724678	10.9134	10.9134
ARHGAP21	63957	0.0198994	0.113066	0.759135	-1.31729	0.135078	0.458547	0.8421	-1.18751	0.0117558	0.0616365	0.74058	-1.35029
ARHGAP22	5163.99	0.0420861	0.196138	2.81713	2.81713	0.0889248	0.353906	2.42408	2.42408	0.0727636	0.233976	2.52935	2.52935
ARHGAP23	4355	0.0234606	0.127789	10.2119	10.2119	0.104843	0.394293	5.60197	5.60197	0.000941601	0.00798603	27.1519	27.1519
ARHGAP24	369	0.988655	1	1.09179	1.09179	0.636661	0.911361	0.132971	-7.52046	0.967187	0.988948	4.80331	4.80331
ARHGAP25	29	0.502609	0.808547	49.5413	49.5413	1	1	1	-1	0.2937	0.55845	927.876	927.876
ARHGAP26	5046	0.413371	0.748852	0.832653	-1.20098	0.713687	0.946336	1.0781	1.0781	0.93249	0.977444	0.978232	-1.02225
ARHGAP27	4646	0.269245	0.612208	0.643239	-1.55463	0.0170622	0.113808	2.12969	2.12969	0.569227	0.787544	1.21602	1.21602
ARHGAP28	266	0.14668	0.440627	3.52399	3.52399	0.196906	0.566471	3.20459	3.20459	0.0100978	0.0548265	100.664	100.664
ARHGAP29	268	0.761402	0.943565	0.908396	-1.10084	0.762223	0.966032	0.934581	-1.07	0.00384476	0.0254507	2.45799	2.45799
ARHGAP30	186	0.54804	0.83334	1.10279	1.10279	0.0151895	0.103842	1.95764	1.95764	0.00250829	0.01802	3.05334	3.05334
ARHGAP31	17716	0.168408	0.478045	0.72839	-1.37289	0.929695	1	1.01873	1.01873	0.125872	0.339546	0.700341	-1.42788
ARHGAP31-AS1	298	0.899643	0.991551	1.00407	1.00407	0.343778	0.727425	1.27483	1.27483	0.629655	0.825556	1.13685	1.13685
ARHGAP32	34940.4	0.466148	0.78411	0.885625	-1.12915	0.887443	0.999357	1.02299	1.02299	0.919278	0.971374	1.01644	1.01644
ARHGAP33	23062.9	0.162553	0.468704	0.735668	-1.35931	0.392099	0.771718	1.18109	1.18109	0.670205	0.849972	1.0881	1.0881
ARHGAP35	137875	0.288879	0.633551	0.914569	-1.09341	0.588505	0.89085	1.04503	1.04503	0.492526	0.732967	1.05729	1.05729
ARHGAP36	40	0.14138	0.430931	0.0353023	-28.3268	0.0552809	0.263346	0.000689848	-1449.6	0.196327	0.448914	0.160541	-6.22895
ARHGAP39	22036	0.0942102	0.335635	1.43536	1.43536	0.808191	0.980497	1.05773	1.05773	0.00926562	0.0511648	1.72027	1.72027
ARHGAP4	4342.01	0.218577	0.552764	0.491254	-2.03561	0.0228677	0.141905	2.45217	2.45217	0.071138	0.230532	0.275753	-3.62644
ARHGAP40	33	0.366241	0.710791	1.95369	1.95369	0.622981	0.904785	1.29164	1.29164	0.22141	0.481264	2.13222	2.13222
ARHGAP42	939	1.13493e-06	2.92195e-05	0.23885	-4.18672	0.192966	0.56054	0.719908	-1.38907	1.13179e-06	2.18974e-05	0.241249	-4.1451
ARHGAP44	8415	0.0458953	0.208134	2.3632	2.3632	0.0329986	0.184234	2.48879	2.48879	0.00287898	0.0201859	3.40221	3.40221
ARHGAP5	85755.2	1.03707e-08	3.7459e-07	0.553018	-1.80826	1.22346e-06	3.73896e-05	0.615472	-1.62477	6.53249e-06	0.000106821	0.640497	-1.56129
ARHGAP5-AS1	1871	1.7871e-06	4.36521e-05	0.47392	-2.11006	7.49091e-06	0.000185997	0.543685	-1.8393	2.18388e-05	0.000313097	0.593946	-1.68365
ARHGAP6	1089	9.58983e-11	4.76832e-09	0.0530969	-18.8335	1.6257e-27	6.61831e-25	0.00489924	-204.113	1.63481e-11	6.97506e-10	0.0506794	-19.7319
ARHGAP8	8326.68	0.00587293	0.0442613	0.380859	-2.62565	0.0409555	0.215218	0.527163	-1.89695	0.0490749	0.177423	0.543252	-1.84077
ARHGAP9	167	0.00504698	0.0391827	3.58787	3.58787	0.431322	0.798305	0.711954	-1.40459	0.0260546	0.11269	2.75558	2.75558
ARHGDIA	297552	0.000435402	0.00521654	0.823111	-1.2149	0.326567	0.712931	0.949067	-1.05367	7.51296e-05	0.000924501	0.801963	-1.24694
ARHGDIB	143	0.808254	0.962878	2.50088	2.50088	0.269102	0.653223	0.166479	-6.00677	0.476282	0.72086	13.7927	13.7927
ARHGDIG	5386	0.222361	0.558216	0.538293	-1.85773	0.36435	0.747231	1.42659	1.42659	0.867255	0.949418	1.07234	1.07234
ARHGEF1	46338.4	0.507775	0.811651	1.09739	1.09739	0.648193	0.917037	1.06659	1.06659	0.989513	0.996864	1.00191	1.00191
ARHGEF10	43837	0.813707	0.963814	0.967056	-1.03407	0.645428	0.915816	0.936142	-1.06821	0.756432	0.897368	0.956762	-1.04519
ARHGEF10L	7785.99	0.75629	0.942429	0.885988	-1.12868	0.855475	0.994016	1.07008	1.07008	0.13624	0.357499	1.65621	1.65621
ARHGEF11	45333.9	0.178607	0.494006	1.0573	1.0573	0.374501	0.755997	1.03799	1.03799	6.67771e-10	2.26938e-08	1.28668	1.28668
ARHGEF12	174517	0.0882749	0.320926	0.885252	-1.12962	0.172223	0.526999	0.907583	-1.10183	0.0165425	0.0801729	0.840481	-1.18979
ARHGEF15	29	0.782112	0.952643	1.46614	1.46614	0.491441	0.83845	2.09293	2.09293	0.444008	0.694223	3.79523	3.79523
ARHGEF16	4477	0.289729	0.634353	1.0952	1.0952	0.0994946	0.381726	0.871986	-1.14681	0.00014006	0.00156933	1.37871	1.37871
ARHGEF17	17263	0.00157196	0.0151842	0.441011	-2.26752	0.811191	0.981531	0.952157	-1.05025	0.0619863	0.210323	0.653484	-1.53026
ARHGEF18	40986.1	0.254317	0.595354	1.18796	1.18796	0.256093	0.638386	1.18721	1.18721	0.702948	0.869962	1.06097	1.06097
ARHGEF19	2600	1.39595e-05	0.000276096	0.509172	-1.96397	1.22943e-05	0.000290149	0.499731	-2.00108	1.14348e-05	0.000175804	0.494873	-2.02072
ARHGEF2	29797.2	0.156171	0.457805	0.80269	-1.24581	0.689395	0.936039	0.942133	-1.06142	0.29651	0.561095	0.852604	-1.17288
ARHGEF25	17438.9	0.80175	0.960222	0.945905	-1.05719	0.360192	0.743557	0.809488	-1.23535	0.642332	0.834618	0.901038	-1.10983
ARHGEF26	33199.1	0.00231631	0.0208986	1.63473	1.63473	0.296268	0.682444	0.820726	-1.21843	0.134872	0.354858	1.28812	1.28812
ARHGEF26-AS1	117.748	0.0146049	0.090372	4.05715	4.05715	0.567035	0.880307	0.843738	-1.1852	0.00532325	0.0331914	6.03163	6.03163
ARHGEF28	17164	2.11458e-08	7.37875e-07	19.3911	19.3911	1.22199e-06	3.73896e-05	13.4052	13.4052	0.000638778	0.00580305	6.62208	6.62208
ARHGEF3	8696.97	0.530287	0.822865	1.19301	1.19301	9.11093e-05	0.00161558	2.65968	2.65968	0.0328189	0.133136	1.75585	1.75585
ARHGEF33	181.596	0.111202	0.372812	2.07318	2.07318	0.564547	0.879101	1.20585	1.20585	0.0232374	0.103318	3.30221	3.30221
ARHGEF34P	36.7715	0.856968	0.978933	0.204525	-4.88938	0.810876	0.981257	0.623974	-1.60263	0.996432	0.998988	0.962677	-1.03877
ARHGEF35	36.3823	0.257597	0.598594	0.108308	-9.23296	0.382417	0.762766	0.829732	-1.20521	0.632781	0.827415	0.199569	-5.01079
ARHGEF37	1682	0.546424	0.832394	0.727529	-1.37452	0.841163	0.990185	1.10723	1.10723	0.600255	0.80848	1.28797	1.28797
ARHGEF38	396.162	0.927122	0.997954	0.994173	-1.00586	0.63278	0.909342	0.928647	-1.07684	0.20637	0.462251	0.823605	-1.21417
ARHGEF39	24145	0.755396	0.941883	1.05304	1.05304	0.598528	0.89493	1.09058	1.09058	0.902442	0.9638	1.02155	1.02155
ARHGEF4	9851.56	0.812535	0.963631	0.916635	-1.09095	0.219095	0.594829	1.49638	1.49638	0.0442388	0.164279	1.88213	1.88213
ARHGEF40	20689.7	0.193237	0.515713	1.33204	1.33204	0.231601	0.610156	1.30321	1.30321	0.131774	0.349436	1.38989	1.38989
ARHGEF5	208.685	0.15963	0.464407	0.186779	-5.35393	0.338035	0.721603	0.552071	-1.81136	0.0874199	0.265303	0.0939148	-10.648
ARHGEF6	73427	2.70552e-24	4.41103e-22	3.37303	3.37303	0.48849	0.836555	1.10546	1.10546	7.11533e-05	0.000883359	1.69166	1.69166
ARHGEF7	52139.3	0.17198	0.483549	0.82838	-1.20718	0.675004	0.928891	0.945722	-1.05739	0.618287	0.820004	1.0665	1.0665
ARHGEF9	35731.7	0.284832	0.630053	1.20742	1.20742	0.129746	0.447482	1.30037	1.30037	0.00229662	0.0167895	1.65432	1.65432
ARID1A	202756	0.251358	0.592067	0.924413	-1.08177	0.36897	0.750755	1.06126	1.06126	0.695773	0.865931	0.97391	-1.02679
ARID1B	77747.2	0.361561	0.705963	0.905433	-1.10444	0.0872626	0.350111	0.82629	-1.21023	0.691803	0.863583	1.04252	1.04252
ARID2	60604	0.506371	0.810686	0.921384	-1.08532	0.788084	0.974557	0.967819	-1.03325	0.54915	0.773568	0.928988	-1.07644
ARID3A	18727	0.869969	0.982947	1.03843	1.03843	0.338168	0.721727	1.23594	1.23594	0.54645	0.772333	1.14535	1.14535
ARID3B	60230	0.168787	0.478703	1.1879	1.1879	0.819973	0.984703	1.0299	1.0299	0.0643606	0.215686	1.25679	1.25679
ARID3C	140	0.0473948	0.212564	0.48855	-2.04687	0.019957	0.127904	0.43045	-2.32315	0.246347	0.504822	0.685621	-1.45853
ARID4A	22492.3	0.709947	0.922227	1.08171	1.08171	0.675256	0.928891	1.09218	1.09218	0.154446	0.387573	1.33191	1.33191
ARID4B	43599.2	0.457081	0.778389	0.900741	-1.1102	0.850087	0.993243	1.0261	1.0261	0.547325	0.772948	0.91922	-1.08788
ARID5A	6992	0.110707	0.371834	1.16979	1.16979	0.0291288	0.168554	1.23761	1.23761	0.779151	0.908031	1.03248	1.03248
ARID5B	42660.1	7.46828e-06	0.0001588	0.301571	-3.31597	9.45838e-21	1.88598e-18	3.86229	3.86229	0.311601	0.573894	0.823671	-1.21408
ARIH1	138793	0.223039	0.55898	0.905156	-1.10478	0.671041	0.927712	1.03416	1.03416	0.381999	0.642136	0.931506	-1.07353
ARIH2	115053	0.00506642	0.0392444	1.29303	1.29303	0.285603	0.67164	1.10676	1.10676	0.00296523	0.0206352	1.31203	1.31203
ARIH2OS	1011.26	0.343379	0.687958	1.13825	1.13825	0.0358669	0.19583	1.34062	1.34062	0.000253212	0.00260971	1.67498	1.67498
ARL1	39028	0.255351	0.596733	1.18838	1.18838	0.668769	0.926394	0.933529	-1.0712	0.130224	0.346831	1.25469	1.25469
ARL10	489	0.5332	0.824823	2.31137	2.31137	0.87148	0.995659	1.20007	1.20007	0.069382	0.226592	23.2445	23.2445
ARL11	81	0.419814	0.754165	0.229941	-4.34895	0.874885	0.996263	0.864969	-1.15611	0.0164149	0.0797325	0.0587498	-17.0213
ARL13A	157	0.83485	0.970907	1.14305	1.14305	0.362597	0.745224	1.81492	1.81492	0.827505	0.931896	1.57144	1.57144
ARL13B	12679.1	0.000172737	0.00238379	1.13443	1.13443	0.0614418	0.281113	0.940206	-1.0636	0.0126189	0.0652652	1.08684	1.08684
ARL14EP	18190.7	0.8266	0.968043	1.03634	1.03634	0.408946	0.783221	0.871502	-1.14744	0.838327	0.937069	1.03432	1.03432
ARL15	9783	0.712192	0.923855	0.906662	-1.10295	0.60578	0.897098	1.14062	1.14062	0.778	0.90737	1.07559	1.07559
ARL16	14551	0.696381	0.914194	1.09818	1.09818	0.674378	0.928518	0.899254	-1.11203	0.70022	0.868296	1.09679	1.09679
ARL17A	45052.5	0.904238	0.991811	1.01751	1.01751	0.394546	0.772875	1.12731	1.12731	0.876987	0.953384	0.977697	-1.02281
ARL17B	238.675	0.713587	0.924437	1.26272	1.26272	0.152301	0.492001	4.87474	4.87474	0.821607	0.929057	1.00838	1.00838
ARL2	43001.3	0.25441	0.59541	1.17898	1.17898	0.69016	0.936621	0.940977	-1.06273	0.454097	0.702519	1.11577	1.11577
ARL2-SNX15	2972.56	0.895531	0.990732	0.921625	-1.08504	0.668863	0.926394	1.27907	1.27907	0.452031	0.700653	1.51822	1.51822
ARL2BP	60309	0.431382	0.760402	1.10576	1.10576	0.481448	0.832564	1.09435	1.09435	0.0841972	0.258857	1.23973	1.23973
ARL3	26088	0.571513	0.847202	0.891382	-1.12185	0.801711	0.97852	1.05015	1.05015	0.0783961	0.246253	1.38063	1.38063
ARL4A	38769.8	1.47281e-12	9.22441e-11	3.66454	3.66454	0.00681399	0.0555495	1.73518	1.73518	5.58223e-11	2.24912e-09	3.36724	3.36724
ARL4C	17399.2	7.03112e-06	0.000149995	0.127868	-7.82057	0.00192615	0.0201063	1.81399	1.81399	0.0114732	0.0605615	0.512072	-1.95285
ARL4D	3369	0.305773	0.651063	1.10343	1.10343	0.00210557	0.0216552	1.33946	1.33946	0.00288078	0.0201913	1.32419	1.32419
ARL5A	53717	0.322371	0.667243	1.13069	1.13069	0.0193739	0.125401	0.721379	-1.38623	0.678065	0.854788	0.947618	-1.05528
ARL5B	32446	0.342974	0.687718	0.856337	-1.16776	0.162719	0.51102	0.791977	-1.26266	0.250587	0.510288	0.827246	-1.20883
ARL6	3573	0.270528	0.613412	1.25542	1.25542	0.740183	0.957049	0.932238	-1.07269	0.16341	0.402064	1.34046	1.34046
ARL6IP1	199445	0.000269085	0.00347764	0.779111	-1.28351	0.38076	0.761139	0.944581	-1.05867	0.00201594	0.0150357	0.811254	-1.23266
ARL6IP4	71535.4	0.336464	0.681755	0.899346	-1.11192	0.3352	0.719352	0.899084	-1.11224	0.0434417	0.162437	0.794103	-1.25928
ARL6IP5	52220	0.00222429	0.0202199	1.56605	1.56605	3.18762e-06	8.76079e-05	1.93018	1.93018	0.0375616	0.14633	1.36815	1.36815
ARL6IP6	25702	0.00100997	0.0106107	0.683064	-1.46399	0.00163214	0.0175291	0.69559	-1.43763	0.000521793	0.00488856	0.667262	-1.49866
ARL8A	22344.7	0.41209	0.747692	0.828758	-1.20662	0.925918	1	1.02037	1.02037	0.0300208	0.124657	1.53655	1.53655
ARL8B	63590	0.551128	0.835446	1.07612	1.07612	0.868672	0.995571	1.02083	1.02083	0.218556	0.477398	1.16039	1.16039
ARL9	19	0.369572	0.713406	2.44975	2.44975	0.952387	1	1.42771	1.42771	0.38493	0.644773	3.08299	3.08299
ARMC1	53412.4	0.77055	0.946708	0.963337	-1.03806	0.303584	0.690377	0.873584	-1.14471	0.461495	0.708628	0.908732	-1.10043
ARMC10	27814.7	1.79386e-06	4.37626e-05	1.12781	1.12781	6.71868e-06	0.00016832	1.11991	1.11991	0.000889901	0.00761364	1.08642	1.08642
ARMC12	997	0.0353998	0.173806	1.66331	1.66331	0.00161777	0.0174079	2.08291	2.08291	0.000247192	0.00255176	2.38029	2.38029
ARMC2	2287	0.383507	0.724558	1.45306	1.45306	0.340368	0.723972	1.48186	1.48186	0.248516	0.50771	1.60682	1.60682
ARMC2-AS1	45	0.296664	0.641747	1.67911	1.67911	0.774629	0.969639	0.566882	-1.76403	0.251141	0.511202	1.86295	1.86295
ARMC3	15	0.473025	0.789042	0.0196434	-50.9077	0.473025	0.826444	0.0196434	-50.9077	0.722752	0.8807	9.12315	9.12315
ARMC4	4635	6.80126e-21	8.6865e-19	1.92915	1.92915	0.00443985	0.0396778	0.826494	-1.20993	1.01088e-34	2.86284e-32	2.46108	2.46108
ARMC5	13339	0.523705	0.818762	0.85718	-1.16662	0.511671	0.848919	0.852816	-1.17259	0.960823	0.987366	0.988475	-1.01166
ARMC6	48218.8	0.448636	0.771114	1.10515	1.10515	0.182783	0.543849	0.827543	-1.2084	0.482435	0.725714	0.907216	-1.10227
ARMC7	11136	0.20499	0.533242	1.17209	1.17209	0.671021	0.927712	0.948496	-1.0543	0.218553	0.477398	1.16508	1.16508
ARMC8	29378.1	0.969009	1	0.993079	-1.00697	0.919534	1	1.01812	1.01812	0.558397	0.780351	1.10738	1.10738
ARMC9	14268	0.393705	0.732466	0.79873	-1.25199	0.0979201	0.37778	1.46231	1.46231	0.907445	0.966079	1.02938	1.02938
ARMCX1	1204	0.567536	0.843978	3.41272	3.41272	0.909896	1	3.30658	3.30658	0.580964	0.795999	389.433	389.433
ARMCX2	1861	0.940051	1	1.94147	1.94147	0.495685	0.840446	0.0039914	-250.538	0.29437	0.559147	243.957	243.957
ARMCX3	59534.8	0.21949	0.554071	1.17333	1.17333	0.228972	0.607679	1.16966	1.16966	0.0384603	0.148911	1.30121	1.30121
ARMCX4	727.47	0.984159	1	1.33968	1.33968	0.899557	1	0.610251	-1.63867	0.883553	0.956273	57.6576	57.6576
ARMCX5	28872.9	0.45942	0.779589	0.976312	-1.02426	0.000533638	0.00702401	1.11818	1.11818	0.895125	0.960341	1.00465	1.00465
ARMCX5-GPRASP2	13320.5	0.405814	0.742772	0.80707	-1.23905	0.290787	0.676952	0.757955	-1.31934	0.620102	0.82031	0.882751	-1.13282
ARMCX6	23231.9	0.43347	0.761524	1.17064	1.17064	0.736348	0.955444	0.930898	-1.07423	0.216796	0.475414	1.27588	1.27588
ARMS2	39	0.00379653	0.031041	0.238109	-4.19975	0.00254443	0.0254066	0.204169	-4.89791	0.105682	0.302893	0.617442	-1.61959
ARNT	36606	0.441646	0.766631	1.13832	1.13832	0.0420779	0.219031	1.38764	1.38764	0.160927	0.397909	1.2595	1.2595
ARNT2	67906	0.000804181	0.00874972	1.53088	1.53088	0.401079	0.777374	1.12091	1.12091	1.8217e-08	4.90328e-07	1.97875	1.97875
ARNTL	5382.99	0.294384	0.639114	0.644058	-1.55265	0.673816	0.928518	0.849058	-1.17778	0.898605	0.962069	0.953331	-1.04895
ARNTL2	32670.6	0.0117243	0.0762409	1.15738	1.15738	0.00765314	0.0609965	1.16717	1.16717	2.99324e-08	7.78839e-07	1.37278	1.37278
ARNTL2-AS1	117.119	0.696124	0.914016	1.07563	1.07563	0.192098	0.559516	1.54425	1.54425	0.890461	0.958298	1.00223	1.00223
ARPC1A	113619	0.338401	0.683831	0.91791	-1.08943	0.727847	0.95168	0.969759	-1.03118	0.310236	0.572565	0.913092	-1.09518
ARPC1B	37088.1	0.957934	1	1.009	1.009	0.00231173	0.0234424	1.59659	1.59659	0.758016	0.898305	1.05316	1.05316
ARPC2	122261	0.000413875	0.00500156	0.734361	-1.36173	0.451618	0.812921	0.940331	-1.06346	0.000851461	0.00733292	0.748193	-1.33655
ARPC3	85677.7	0.901739	0.991551	0.987041	-1.01313	0.412846	0.785992	1.08813	1.08813	0.781777	0.909274	1.02938	1.02938
ARPC4	47570.3	0.722322	0.927939	1.05143	1.05143	0.65456	0.919404	1.06496	1.06496	0.596006	0.80595	1.0772	1.0772
ARPC4-TTLL3	9701.78	0.748225	0.939537	0.905787	-1.10401	0.75848	0.965128	1.0947	1.0947	0.808013	0.92314	0.928511	-1.07699
ARPC5	88878.7	0.344196	0.688429	0.907197	-1.1023	0.815592	0.983118	0.976713	-1.02384	0.827836	0.931918	0.978277	-1.02221
ARPC5L	33152	0.808891	0.962975	1.04032	1.04032	0.361279	0.744307	0.854778	-1.16989	0.94307	0.981337	1.01181	1.01181
ARPIN	214.8	0.799766	0.959308	1.4224	1.4224	0.868956	0.995571	0.802608	-1.24594	0.198627	0.451375	20.2105	20.2105
ARPP19	231090	0.13429	0.417111	1.09554	1.09554	0.0405164	0.21352	0.876277	-1.14119	0.198021	0.451008	0.921362	-1.08535
ARPP21	272	0.93685	0.99992	1.20667	1.20667	0.00680369	0.0555336	0.000714445	-1399.69	0.832984	0.934727	4.92176	4.92176
ARR3	125	0.323476	0.668493	1.37739	1.37739	0.182697	0.543849	1.60358	1.60358	0.10905	0.309416	1.84406	1.84406
ARRB1	23279.9	0.0144789	0.0897913	1.76518	1.76518	0.492861	0.83923	1.18861	1.18861	4.05613e-06	6.95881e-05	2.72035	2.72035
ARRB2	46466.1	0.126672	0.402256	0.878924	-1.13775	0.083553	0.341857	0.863616	-1.15792	0.0537118	0.189421	0.849056	-1.17778
ARRDC1	9049	0.437189	0.763276	0.843753	-1.18518	0.648753	0.917334	1.09929	1.09929	0.400451	0.656973	0.832439	-1.20129
ARRDC1-AS1	12136	0.0842581	0.311363	1.29085	1.29085	0.833777	0.98862	1.0326	1.0326	0.0663906	0.220166	1.31483	1.31483
ARRDC2	13944	0.743058	0.936998	1.08794	1.08794	0.452748	0.813831	1.20745	1.20745	0.989161	0.996812	0.996655	-1.00336
ARRDC3	44865	0.533463	0.824977	0.909288	-1.09976	0.450122	0.811947	1.11581	1.11581	0.0944091	0.279862	1.266	1.266
ARRDC3-AS1	1563	0.0228723	0.125688	0.744152	-1.34381	0.0554462	0.263683	0.773031	-1.29361	0.0011151	0.00918253	0.646156	-1.54761
ARRDC4	11524	0.926815	0.997845	1.02725	1.02725	0.777069	0.970393	1.08469	1.08469	0.58736	0.799722	1.16552	1.16552
ARRDC5	11	0.381352	0.723354	0.0118595	-84.3208	0.347362	0.731051	3.84007	3.84007	0.967144	0.988948	0.797021	-1.25467
ARSA	11439	0.354279	0.699784	1.29228	1.29228	0.134311	0.457098	1.49621	1.49621	0.12063	0.330168	1.51777	1.51777
ARSB	15893	0.469285	0.786122	1.19841	1.19841	0.755948	0.964712	1.08288	1.08288	0.118015	0.326047	1.45507	1.45507
ARSD	5372	0.241177	0.581473	0.840773	-1.18938	0.000214542	0.00330629	1.67039	1.67039	6.43504e-05	0.000808663	1.72685	1.72685
ARSE	55	0.332483	0.677519	0.552929	-1.80855	0.744421	0.958662	0.825501	-1.21139	0.129362	0.345432	0.415307	-2.40786
ARSG	6579.99	0.211301	0.542294	1.69042	1.69042	0.143729	0.474908	1.831	1.831	0.0848751	0.260021	2.01713	2.01713
ARSI	314	0.0353111	0.173501	0.440381	-2.27076	0.000374535	0.00528052	5.28188	5.28188	0.0703562	0.228695	0.435954	-2.29382
ARSJ	476	0.932851	0.999516	0.881969	-1.13383	0.383532	0.763819	3.26279	3.26279	0.460311	0.707553	2.60464	2.60464
ARSK	12154	1.48164e-06	3.69768e-05	1.67861	1.67861	0.000445161	0.00603252	1.46792	1.46792	1.12596e-05	0.000173384	1.61022	1.61022
ART1	73	0.661718	0.896079	29.8621	29.8621	0.502995	0.843476	0.00991913	-100.815	0.43245	0.684873	3.31883	3.31883
ART3	14	7.69738e-05	0.00119661	0.00278532	-359.025	0.325257	0.711704	0.739324	-1.35259	7.69738e-05	0.000942447	0.00278532	-359.025
ART5	859	0.402862	0.739839	0.636367	-1.57142	0.537549	0.863791	0.735899	-1.35888	0.598736	0.8076	0.781682	-1.27929
ARTN	296	0.0187137	0.108063	0.648101	-1.54297	0.819309	0.98442	1.03629	1.03629	0.157838	0.392805	1.21902	1.21902
ARV1	24955	0.16835	0.478045	1.31107	1.31107	0.563899	0.87837	1.12458	1.12458	0.165667	0.405575	1.31313	1.31313
ARVCF	16908.4	0.229953	0.568839	0.758722	-1.31801	0.141914	0.47167	0.708545	-1.41134	0.460155	0.707553	0.848174	-1.179
ARX	8717	1.73183e-06	4.26217e-05	0.248482	-4.02444	9.68517e-08	3.74028e-06	0.160329	-6.23717	0.000439306	0.00421014	0.424845	-2.3538
AS3MT	19205.1	0.166029	0.474324	0.739442	-1.35237	0.549173	0.870523	1.12414	1.12414	0.00948102	0.052071	0.535804	-1.86635
ASAH1	34423	0.0355609	0.17429	1.45394	1.45394	0.168718	0.52043	1.28597	1.28597	0.0014439	0.0113771	1.73063	1.73063
ASAH2	426.554	0.0405548	0.191236	1.43528	1.43528	0.993292	1	0.992859	-1.00719	0.0185507	0.087244	1.51244	1.51244
ASAH2B	1217.45	0.509502	0.812734	0.887061	-1.12732	0.262219	0.64401	0.814867	-1.22719	0.539122	0.767464	0.916635	-1.09095
ASAP1	80713.9	0.769299	0.946177	0.968875	-1.03212	0.542592	0.867021	1.06614	1.06614	0.912703	0.968406	0.988293	-1.01185
ASAP1-IT1	16	0.0564351	0.239891	0.314198	-3.18271	0.0888333	0.353906	0.419763	-2.3823	0.120679	0.330168	0.457829	-2.18422
ASAP1-IT2	244	0.694884	0.913593	0.894666	-1.11774	0.750448	0.961268	0.886436	-1.12811	0.868562	0.949993	0.93763	-1.06652
ASAP2	38019.5	4.50082e-13	2.98137e-11	0.695434	-1.43795	0.356912	0.740147	0.955763	-1.04628	4.42439e-16	3.16399e-14	0.663622	-1.50688
ASAP3	22140	0.082642	0.307964	0.694039	-1.44084	0.763594	0.966244	1.05814	1.05814	0.149761	0.380756	0.742925	-1.34603
ASB1	42945	0.884459	0.987274	0.980188	-1.02021	0.362762	0.745398	0.878909	-1.13777	0.43414	0.686269	0.895601	-1.11657
ASB11	18	0.734082	0.9339	15.9534	15.9534	0.986959	1	1.14028	1.14028	0.954954	0.985922	1.57536	1.57536
ASB12	257	0.464861	0.783225	0.834558	-1.19824	0.000399932	0.00557423	0.285803	-3.49891	0.28459	0.547899	0.775916	-1.2888
ASB13	31303.9	0.171468	0.482455	1.2549	1.2549	0.765133	0.966544	0.948352	-1.05446	0.965513	0.988699	1.00761	1.00761
ASB14	1456.05	0.238948	0.578814	1.09174	1.09174	0.00249094	0.0249746	1.30249	1.30249	0.181485	0.42812	1.10782	1.10782
ASB16	1937.73	0.229994	0.568839	0.820964	-1.21808	0.448483	0.811143	0.87528	-1.14249	0.311806	0.574014	0.835389	-1.19705
ASB16-AS1	6686.27	0.668728	0.900283	0.930925	-1.0742	0.833518	0.98862	1.03509	1.03509	0.757269	0.897877	0.955228	-1.04687
ASB18	68	0.000706098	0.00782636	4.12255	4.12255	0.0897569	0.356058	0.709475	-1.40949	0.00332941	0.0226769	2.54674	2.54674
ASB2	124	0.956229	1	37.4839	37.4839	0.977289	1	1.26943	1.26943	0.671082	0.85053	1.63339	1.63339
ASB3	11109.9	0.514662	0.814484	0.844108	-1.18468	0.768627	0.967502	0.92848	-1.07703	0.644612	0.835628	0.888511	-1.12548
ASB5	105	0.00916623	0.0627161	6.51661	6.51661	0.0872477	0.350111	2.41844	2.41844	0.56579	0.785452	0.768934	-1.3005
ASB6	26713.4	0.776429	0.949568	1.05394	1.05394	0.693217	0.938675	0.927454	-1.07822	0.682944	0.857756	1.07804	1.07804
ASB7	15406	0.927231	0.997954	1.01235	1.01235	0.163978	0.513262	1.18257	1.18257	0.806445	0.92205	0.970246	-1.03067
ASB8	23149.4	0.336407	0.681755	1.16641	1.16641	0.69015	0.936621	0.93485	-1.06969	0.394184	0.651395	1.1466	1.1466
ASB9	21.2445	0.231856	0.570918	155.439	155.439	0.0375831	0.203438	529.114	529.114	0.0611181	0.208249	192.884	192.884
ASB9P1	189.756	0.999256	1	1.00625	1.00625	0.719585	0.948552	0.766881	-1.30398	0.771724	0.904145	0.773352	-1.29307
ASCC1	17922.4	3.72541e-06	8.44526e-05	1.56191	1.56191	0.00040624	0.00564605	1.41335	1.41335	7.12831e-08	1.71968e-06	1.67412	1.67412
ASCC2	38387	0.397354	0.735572	1.14174	1.14174	0.296744	0.68284	1.17607	1.17607	0.461961	0.708793	1.12251	1.12251
ASCC3	78640.2	0.000237888	0.00314731	1.49312	1.49312	0.12056	0.426943	1.19423	1.19423	0.00556117	0.034346	1.36097	1.36097
ASCL1	41619	0.00787806	0.0559191	233.79	233.79	0.36558	0.748442	7.22377	7.22377	0.000591676	0.00543325	1141.19	1141.19
ASCL2	17	0.0329669	0.165119	399.127	399.127	0.242553	0.62227	74.8563	74.8563	0.0394053	0.151638	256.495	256.495
ASCL3	66	0.0183037	0.106229	0.389275	-2.56888	0.565491	0.879728	0.822104	-1.21639	0.0838628	0.25824	0.559404	-1.78762
ASCL5	70	0.604541	0.865003	0.843965	-1.18488	0.853243	0.993696	1.06652	1.06652	0.271968	0.534499	0.620032	-1.61282
ASF1A	30441	0.775256	0.949084	1.04956	1.04956	0.221032	0.597316	0.800767	-1.2488	0.421293	0.67496	1.1428	1.1428
ASF1B	54467	0.310154	0.655496	0.880355	-1.1359	0.140676	0.469826	0.82859	-1.20687	0.0859666	0.262357	0.8016	-1.2475
ASGR1	440	0.00428531	0.0342632	2.29985	2.29985	1.38751e-06	4.18415e-05	4.22658	4.22658	4.65643e-13	2.38822e-11	9.51992	9.51992
ASH1L	82883.5	0.94522	1	1.00744	1.00744	0.698217	0.940697	1.04232	1.04232	0.284441	0.547899	1.11908	1.11908
ASH1L-AS1	2565.07	0.781568	0.952396	0.860308	-1.16237	0.946115	1	1.03708	1.03708	0.647756	0.837408	0.775956	-1.28873
ASH2L	63406.2	0.288269	0.633293	0.95706	-1.04487	5.34965e-05	0.00103914	1.17524	1.17524	3.64981e-09	1.11439e-07	0.780128	-1.28184
ASIC1	42775.2	0.00239358	0.0214064	1.60701	1.60701	0.124582	0.435815	1.2855	1.2855	0.00117037	0.00954515	1.65571	1.65571
ASIC2	539.001	0.00724638	0.0524644	11.2522	11.2522	0.155496	0.497548	3.43378	3.43378	1.49971e-05	0.000223708	187.967	187.967
ASIC3	1476	0.219043	0.553157	0.882525	-1.13311	0.287241	0.67326	0.897278	-1.11448	0.0849927	0.260238	1.18142	1.18142
ASIC4	621	0.894598	0.990679	0.698466	-1.43171	0.755434	0.964265	0.63516	-1.57441	0.33583	0.59821	46.6667	46.6667
ASIC5	26	0.137474	0.423384	0.0613757	-16.2931	0.553451	0.871777	0.235502	-4.24625	0.133848	0.353163	0.055159	-18.1294
ASIP	150	0.315955	0.660565	0.701135	-1.42626	0.294405	0.680554	0.695227	-1.43838	0.113024	0.316509	0.609902	-1.63961
ASL	7980.99	0.0104937	0.0699375	1.23106	1.23106	4.1823e-15	4.92327e-13	1.87237	1.87237	0.00889316	0.0496376	1.2414	1.2414
ASMT	18.0389	0.752981	0.940913	2.5476	2.5476	0.76139	0.965889	1.80928	1.80928	0.260916	0.522471	0.49833	-2.0067
ASMTL	18615.7	0.884587	0.987332	1.03378	1.03378	0.287224	0.67326	1.26178	1.26178	0.903448	0.96424	1.0282	1.0282
ASMTL-AS1	5352.21	0.704699	0.918831	0.8521	-1.17357	0.704852	0.942436	1.15944	1.15944	0.874896	0.95247	0.937324	-1.06687
ASNA1	39406	0.259962	0.600961	1.19134	1.19134	0.50342	0.843682	1.11147	1.11147	0.339158	0.600969	1.16117	1.16117
ASNS	101255	1.39185e-06	3.50492e-05	1.69502	1.69502	5.84006e-11	3.79138e-09	2.00408	2.00408	9.70502e-09	2.7248e-07	1.85361	1.85361
ASNSD1	47145	0.15354	0.452878	1.21871	1.21871	0.341881	0.725767	0.86651	-1.15406	0.217239	0.475904	1.18769	1.18769
ASPDH	78	0.518335	0.81539	1.5652	1.5652	0.4825	0.832762	1.74579	1.74579	0.884307	0.956425	1.57125	1.57125
ASPG	21	0.287073	0.631935	49.5413	49.5413	1	1	1	-1	0.0356302	0.140998	674.942	674.942
ASPH	71941.7	0.000556661	0.00640996	0.746371	-1.33982	0.0111847	0.0817048	0.810241	-1.2342	8.68931e-07	1.72384e-05	0.649118	-1.54055
ASPHD1	3713	0.283027	0.628247	2.10282	2.10282	0.0295568	0.170324	4.00559	4.00559	0.077012	0.243549	3.18167	3.18167
ASPHD2	9184	0.380069	0.722263	1.30305	1.30305	0.525528	0.856459	1.21454	1.21454	0.188894	0.438435	1.47444	1.47444
ASPM	210957	0.00316793	0.0269033	0.825264	-1.21173	0.271377	0.655498	0.933065	-1.07174	3.47976e-05	0.000467984	0.758978	-1.31756
ASPN	104	0.0111099	0.0731431	3.77224	3.77224	0.0432112	0.223206	2.33776	2.33776	0.275487	0.537641	1.45974	1.45974
ASPRV1	724	0.39903	0.737159	1.26698	1.26698	0.0855363	0.345558	0.602084	-1.6609	0.615181	0.817678	1.20837	1.20837
ASPSCR1	12856	0.803902	0.960759	0.969644	-1.03131	0.466233	0.822074	0.910571	-1.09821	0.808505	0.92323	0.968898	-1.0321
ASRGL1	38194.8	3.35322e-06	7.68173e-05	0.471903	-2.11908	0.00878913	0.0678043	0.6868	-1.45603	0.000637736	0.00579627	0.600405	-1.66554
ASS1	9516.95	0.640743	0.884859	0.881524	-1.1344	0.379401	0.759788	0.782519	-1.27792	0.841723	0.938019	0.948855	-1.0539
ASTE1	6181.07	0.551044	0.835446	0.861976	-1.16012	0.963228	1	0.987521	-1.01264	0.613582	0.816925	0.881133	-1.1349
ASTL	40	0.779998	0.951564	0.539656	-1.85303	0.113442	0.41373	0.326121	-3.06634	0.791843	0.914342	0.562586	-1.77751
ASTN1	4087.92	0.494775	0.802778	0.441629	-2.26435	0.684958	0.933452	2.87027	2.87027	0.392453	0.650349	302.896	302.896
ASTN2	8887.01	0.621688	0.873044	0.886991	-1.12741	0.106447	0.398254	0.656375	-1.52352	0.0804603	0.25069	1.47269	1.47269
ASUN	50570	0.0499898	0.220769	1.30754	1.30754	0.256415	0.63867	1.1724	1.1724	0.162185	0.399995	1.21451	1.21451
ASXL1	108703	0.949555	1	0.994331	-1.0057	0.727146	0.951145	0.968934	-1.03206	0.0837127	0.25786	0.850559	-1.1757
ASXL2	71430	0.177603	0.492275	1.17999	1.17999	9.65568e-06	0.000232836	1.65864	1.65864	0.11879	0.327081	1.20974	1.20974
ASXL3	2205	0.19027	0.511074	8.41523	8.41523	0.857912	0.994533	0.763316	-1.31007	0.0441198	0.164031	48.6295	48.6295
ATAD1	46999	0.82542	0.967503	1.03084	1.03084	0.420114	0.789066	0.891156	-1.12214	0.833243	0.934832	0.971002	-1.02986
ATAD2	151371	6.25098e-08	1.99919e-06	0.682132	-1.46599	0.00246672	0.0247954	0.815592	-1.2261	9.3402e-07	1.84734e-05	0.709683	-1.40908
ATAD2B	31657.6	0.652095	0.890703	1.07955	1.07955	0.942018	1	0.987489	-1.01267	0.4892	0.730478	1.12321	1.12321
ATAD3A	79036.9	0.930804	0.998902	0.991135	-1.00894	0.148513	0.484734	0.857388	-1.16633	0.0186784	0.0875915	0.772796	-1.294
ATAD3B	71149.1	0.772811	0.948096	1.03214	1.03214	0.390217	0.770531	0.907305	-1.10217	0.11626	0.322474	0.833687	-1.19949
ATAD3C	1525.75	0.040483	0.19108	1.3314	1.3314	4.00764e-11	2.71921e-09	2.5407	2.5407	0.0813139	0.25259	1.27713	1.27713
ATAD5	37688	0.285356	0.63053	0.850524	-1.17575	0.30442	0.691143	0.856104	-1.16808	0.0936594	0.278527	0.770195	-1.29837
ATAT1	16726.1	0.202497	0.529289	0.720711	-1.38752	0.2506	0.631652	0.746574	-1.33945	0.161562	0.399024	1.35874	1.35874
ATCAY	7493.99	0.827357	0.968512	0.649039	-1.54074	0.926686	1	1.30046	1.30046	0.383527	0.643433	190.955	190.955
ATE1	25528.5	0.629623	0.877691	0.913146	-1.09511	0.913058	1	0.980052	-1.02035	0.821843	0.929162	1.04216	1.04216
ATE1-AS1	395.468	0.294839	0.639257	0.874547	-1.14345	0.173924	0.529606	0.827036	-1.20914	0.0344398	0.137857	1.40524	1.40524
ATF1	12723	0.642474	0.885747	0.885197	-1.12969	0.436496	0.802211	0.811288	-1.23261	0.926533	0.974689	0.976905	-1.02364
ATF2	39404.9	0.981539	1	0.99642	-1.00359	0.972982	1	1.00525	1.00525	0.715787	0.87694	1.05723	1.05723
ATF3	10467	0.0198616	0.112988	2.24417	2.24417	0.000598763	0.00772306	3.12248	3.12248	0.405533	0.661479	1.37099	1.37099
ATF4	253027	0.9447	1	1.00422	1.00422	0.226001	0.604248	1.07493	1.07493	0.497852	0.736843	0.959239	-1.04249
ATF5	31301.7	0.280604	0.625334	1.20901	1.20901	0.734663	0.954525	0.938574	-1.06545	0.0455987	0.16828	1.40546	1.40546
ATF6	36017.1	0.0928305	0.33187	0.93941	-1.0645	0.415967	0.786885	0.969877	-1.03106	0.800351	0.919007	0.990348	-1.00975
ATF6B	44556.7	0.686738	0.908747	0.942428	-1.06109	0.273565	0.657313	1.16534	1.16534	0.975621	0.991331	0.995596	-1.00442
ATF7	29573.9	0.0767133	0.293744	1.38881	1.38881	0.110099	0.40701	1.34764	1.34764	0.0566883	0.197352	1.42178	1.42178
ATF7IP	107411	1.76889e-06	4.337e-05	1.63769	1.63769	1.63136e-05	0.000371976	1.56642	1.56642	1.64313e-10	6.21051e-09	1.9009	1.9009
ATF7IP2	6838.01	0.00334907	0.0280672	1.27175	1.27175	0.00164596	0.0176336	1.29497	1.29497	7.22366e-05	0.000894535	1.38312	1.38312
ATG10	7775	0.736429	0.934695	0.882062	-1.13371	0.50417	0.844143	1.25708	1.25708	0.459516	0.707262	1.28677	1.28677
ATG101	17090.9	0.557426	0.838785	1.1465	1.1465	0.997938	1	1.00062	1.00062	0.608286	0.813476	1.12738	1.12738
ATG12	39758.1	0.28514	0.630415	1.1771	1.1771	0.771619	0.968539	1.04658	1.04658	0.529873	0.761397	1.10224	1.10224
ATG13	45307.5	0.504576	0.809783	0.979138	-1.02131	0.468871	0.824037	1.02284	1.02284	0.970285	0.989811	1.00113	1.00113
ATG14	17256	0.00422703	0.0339244	1.16625	1.16625	0.106141	0.397519	1.09125	1.09125	0.0145242	0.0725688	1.14079	1.14079
ATG16L1	20942	0.318836	0.663512	1.23886	1.23886	0.761974	0.965889	1.06966	1.06966	0.192517	0.443573	1.31822	1.31822
ATG16L2	3653	0.319181	0.663736	1.57238	1.57238	0.0960589	0.372807	2.0593	2.0593	0.311366	0.573655	1.58711	1.58711
ATG2A	25639	0.476842	0.791738	1.14406	1.14406	0.529258	0.859041	1.12687	1.12687	0.916103	0.969938	1.02075	1.02075
ATG2B	55461	0.433005	0.761323	1.10613	1.10613	0.433415	0.799572	1.10603	1.10603	0.814488	0.926259	0.969296	-1.03168
ATG3	42444.8	0.826156	0.968043	1.03322	1.03322	0.699437	0.941225	1.05874	1.05874	0.800881	0.919184	1.03818	1.03818
ATG4A	10100	0.0119904	0.0775843	1.31302	1.31302	0.0162258	0.109372	1.2992	1.2992	0.00210802	0.0156211	1.39036	1.39036
ATG4B	31098.9	0.672355	0.902313	1.07315	1.07315	0.376133	0.757496	0.855231	-1.16927	0.86214	0.947316	1.02971	1.02971
ATG4C	14857	0.0615332	0.254043	1.1545	1.1545	0.997463	1	1.0024	1.0024	0.433288	0.685411	1.06266	1.06266
ATG4D	22066.1	0.66848	0.900283	1.07717	1.07717	0.976552	1	1.00504	1.00504	0.822688	0.929375	1.04016	1.04016
ATG5	23112	0.956182	1	1.01048	1.01048	0.671149	0.927712	0.920345	-1.08655	0.998588	0.999867	0.999527	-1.00047
ATG7	14550.9	0.660068	0.895348	1.10945	1.10945	0.567135	0.880335	1.14376	1.14376	0.571952	0.789525	1.14188	1.14188
ATG9A	44918.4	0.0768131	0.293854	1.21934	1.21934	0.314776	0.699936	1.12141	1.12141	0.273617	0.536136	1.13324	1.13324
ATG9B	965.317	0.718169	0.926072	1.11859	1.11859	0.310145	0.695284	1.41764	1.41764	0.146127	0.375259	1.55764	1.55764
ATHL1	13238	0.249027	0.589918	1.40917	1.40917	0.0108054	0.0797397	2.03123	2.03123	0.169767	0.411181	1.49706	1.49706
ATIC	115495	0.766062	0.945112	1.02668	1.02668	0.873356	0.995992	0.98585	-1.01435	0.697509	0.866884	0.965671	-1.03555
ATL1	9135.95	0.547249	0.832956	0.808027	-1.23758	0.454682	0.814385	0.764188	-1.30858	0.102483	0.296115	1.63386	1.63386
ATL2	53845.7	2.6648e-06	6.26628e-05	0.894027	-1.11853	0.000171487	0.00276487	0.914379	-1.09364	8.73421e-09	2.49525e-07	0.871832	-1.14701
ATL3	62087.1	0.0599511	0.249658	1.26922	1.26922	0.00460717	0.0408671	1.41989	1.41989	0.299987	0.563799	1.14394	1.14394
ATM	81980.5	0.268994	0.611994	1.12514	1.12514	0.240551	0.620795	1.13312	1.13312	0.782242	0.909329	1.03057	1.03057
ATMIN	66867.6	0.580956	0.851839	0.937573	-1.06658	0.209083	0.582564	0.860691	-1.16186	0.989847	0.996869	1.00146	1.00146
ATN1	116198	1.30128e-06	3.29809e-05	0.826104	-1.2105	3.38022e-07	1.17115e-05	0.817295	-1.22355	0.012498	0.0647463	0.907584	-1.10183
ATOH1	483	0.436077	0.763073	0.721149	-1.38668	0.000891714	0.0107429	0.214369	-4.66485	0.0377734	0.146804	0.454995	-2.19783
ATOH7	15	0.531323	0.823674	0.0234409	-42.6604	0.98622	1	0.889072	-1.12477	0.737953	0.886905	10.1109	10.1109
ATOH8	71.0001	0.428626	0.758883	3.75147	3.75147	0.957102	1	1.47011	1.47011	0.197043	0.449815	5.77434	5.77434
ATOX1	16367	4.12178e-17	3.83542e-15	1.36658	1.36658	1.06927e-27	4.44567e-25	1.50901	1.50901	2.88296e-12	1.36738e-10	1.2928	1.2928
ATP10A	34443	9.6082e-06	0.000199103	0.445123	-2.24657	0.000639186	0.00814233	1.55905	1.55905	8.01087e-12	3.53364e-10	0.120485	-8.29981
ATP10D	99346	1.15192e-11	6.62047e-10	0.561217	-1.78184	1.04493e-12	8.68889e-11	0.541453	-1.84688	5.84809e-37	1.93691e-34	0.212538	-4.70503
ATP11A	66553.6	0.823226	0.967212	1.02716	1.02716	0.336704	0.720569	1.11948	1.11948	0.723465	0.881106	1.04318	1.04318
ATP11A-AS1	101	0.904023	0.991811	0.798972	-1.25161	0.746135	0.959627	0.682369	-1.46548	0.879057	0.953997	0.982405	-1.01791
ATP11AUN	19	0.230149	0.569052	2.07413	2.07413	0.44234	0.806773	1.4534	1.4534	0.758461	0.898574	1.25215	1.25215
ATP11B	53699	0.0542825	0.233	1.29967	1.29967	0.289426	0.675484	1.15951	1.15951	0.00795718	0.0455251	1.42539	1.42539
ATP11C	164758	0.0267166	0.140948	0.842478	-1.18697	0.000166314	0.00269705	1.29958	1.29958	0.000588142	0.00540841	0.760673	-1.31462
ATP12A	61	0.0204292	0.115452	0.218619	-4.57416	0.123592	0.433825	0.429841	-2.32644	0.696553	0.866412	1.22885	1.22885
ATP13A1	65971	0.095773	0.340026	1.21495	1.21495	0.407469	0.78185	1.10406	1.10406	0.975655	0.991331	0.996273	-1.00374
ATP13A2	55742.7	0.29436	0.639114	0.861838	-1.16031	0.000363416	0.00515349	1.55427	1.55427	0.891534	0.958804	1.0187	1.0187
ATP13A3	103475	0.284597	0.62982	1.10323	1.10323	0.18238	0.543523	0.878399	-1.13844	0.810442	0.924302	0.977573	-1.02294
ATP13A4	152	0.000956632	0.0101156	14.359	14.359	0.315432	0.700678	1.71906	1.71906	0.000763923	0.00673335	18.0929	18.0929
ATP13A5	125.654	0.138751	0.426439	1.58141	1.58141	0.202319	0.574353	0.720624	-1.38769	0.374115	0.635172	1.28049	1.28049
ATP13A5-AS1	100.346	0.0198134	0.112747	3.60313	3.60313	0.668508	0.926345	1.17453	1.17453	0.0375067	0.146232	2.70805	2.70805
ATP1A1	249973	0.00985865	0.0667063	1.16322	1.16322	0.269822	0.653599	0.934064	-1.07059	0.234322	0.49056	0.929026	-1.0764
ATP1A1-AS1	2014.36	0.000346779	0.00432168	0.762071	-1.31221	0.03133	0.177764	0.859966	-1.16284	0.000330272	0.00330289	0.759458	-1.31673
ATP1A2	2523.74	0.987111	1	63.7504	63.7504	0.626994	0.906382	0.473557	-2.11168	0.502744	0.741051	168.725	168.725
ATP1A3	57160.8	0.872608	0.98363	0.935436	-1.06902	0.460341	0.818817	1.35358	1.35358	0.0602173	0.20597	2.45179	2.45179
ATP1A4	286.521	0.747197	0.938891	30.4522	30.4522	0.620845	0.903144	0.00991913	-100.815	0.687191	0.860464	72.6724	72.6724
ATP1B1	34635.9	0.171218	0.482099	0.587447	-1.70228	0.710277	0.945179	1.15099	1.15099	0.560415	0.78194	1.37775	1.37775
ATP1B2	8202	0.338014	0.683619	1.61137	1.61137	0.652695	0.919297	1.26553	1.26553	2.55683e-05	0.00035893	5.93579	5.93579
ATP1B3	113415	0.00113654	0.01164	1.34032	1.34032	0.795723	0.977829	0.975217	-1.02541	0.0181229	0.0857855	1.24144	1.24144
ATP2A1	10873.8	0.208323	0.538116	15.3198	15.3198	0.941873	1	0.90258	-1.10794	0.827414	0.931896	1.36167	1.36167
ATP2A2	347612	0.547985	0.83334	1.03174	1.03174	0.65551	0.919748	1.02352	1.02352	0.212289	0.469057	1.06646	1.06646
ATP2A3	8121.17	0.0834664	0.30967	0.51666	-1.93551	0.955424	1	0.982469	-1.01784	0.962791	0.987836	0.985391	-1.01483
ATP2B1	60400.6	0.373661	0.717215	0.889153	-1.12467	0.0777087	0.326842	1.23966	1.23966	0.522186	0.756247	1.08372	1.08372
ATP2B2	978.44	0.841687	0.974759	0.816852	-1.22421	0.982928	1	1.0754	1.0754	0.166349	0.406684	47.0919	47.0919
ATP2B3	1137	0.511161	0.813602	2.41243	2.41243	0.800977	0.97852	0.713192	-1.40215	0.0135168	0.0688179	89.6798	89.6798
ATP2B4	67315.2	0.0806092	0.302825	1.2747	1.2747	8.35503e-13	7.04053e-11	2.422	2.422	0.000642308	0.0058226	1.57442	1.57442
ATP2C1	94097.5	0.358275	0.70341	0.915774	-1.09197	0.131367	0.451236	0.863494	-1.15809	0.0195588	0.090805	0.792542	-1.26176
ATP2C2	124	0.165534	0.473395	1.74565	1.74565	0.982418	1	1.00664	1.00664	0.163657	0.402403	1.71433	1.71433
ATP4A	234	0.883256	0.986517	0.906197	-1.10351	0.0276014	0.162078	2.24552	2.24552	0.328791	0.590145	0.688926	-1.45153
ATP5A1	530788	7.78206e-05	0.00120786	1.18215	1.18215	0.00398634	0.0365028	1.1311	1.1311	0.00107378	0.00890269	1.14959	1.14959
ATP5B	726451	0.00105499	0.0109716	1.12487	1.12487	0.00165175	0.017686	1.1198	1.1198	0.589483	0.801395	1.02004	1.02004
ATP5C1	120339	0.338547	0.683849	1.08799	1.08799	0.656354	0.919762	1.04043	1.04043	0.389578	0.648465	1.07893	1.07893
ATP5D	66094.5	0.00870809	0.0603207	1.36321	1.36321	0.426178	0.79439	1.10357	1.10357	0.195421	0.447524	1.17132	1.17132
ATP5E	90104	0.75653	0.942429	1.03322	1.03322	0.000455361	0.0061367	1.41106	1.41106	0.641563	0.834051	0.951138	-1.05137
ATP5EP2	8242.59	0.32733	0.672664	1.20964	1.20964	0.0431747	0.223077	1.46791	1.46791	0.980275	0.993443	1.00611	1.00611
ATP5F1	137911	0.0171463	0.101543	1.21879	1.21879	0.0437563	0.224893	1.18353	1.18353	0.193484	0.444651	1.11644	1.11644
ATP5G1	50227.7	0.0088049	0.0608188	1.43401	1.43401	0.22871	0.607312	1.1883	1.1883	0.131942	0.349834	1.23852	1.23852
ATP5G2	132884	0.378291	0.720553	1.07631	1.07631	0.466198	0.822074	1.06291	1.06291	0.80523	0.921562	1.02107	1.02107
ATP5G3	166162	0.01282	0.0820019	1.20399	1.20399	0.395688	0.773781	1.06734	1.06734	0.220782	0.480588	1.09781	1.09781
ATP5H	63161.8	0.221747	0.55739	1.1611	1.1611	0.631737	0.908639	1.06165	1.06165	0.150756	0.382415	1.19079	1.19079
ATP5I	45219	0.767815	0.945509	1.04163	1.04163	0.657763	0.920845	1.06269	1.06269	0.821776	0.92914	1.03159	1.03159
ATP5J	68758.9	0.912253	0.99444	0.987381	-1.01278	0.959939	1	0.994234	-1.0058	0.661404	0.844683	0.9503	-1.0523
ATP5J2	81620.9	0.640476	0.884759	1.05185	1.05185	0.432415	0.798736	1.08793	1.08793	0.415587	0.670325	1.09125	1.09125
ATP5J2-PTCD1	11480.4	0.656542	0.893435	1.11814	1.11814	0.798805	0.97852	1.06692	1.06692	0.329313	0.590701	1.26844	1.26844
ATP5L	91623.1	0.36398	0.708307	1.09606	1.09606	0.93658	1	1.00824	1.00824	0.273223	0.535889	1.11652	1.11652
ATP5L2	639.77	0.553798	0.836756	1.04608	1.04608	0.318625	0.704562	0.92813	-1.07744	0.15907	0.394979	0.886939	-1.12747
ATP5O	118210	0.251421	0.592073	1.10859	1.10859	0.412021	0.78551	1.07707	1.07707	0.115492	0.321164	1.15055	1.15055
ATP5S	5347	0.167647	0.477272	0.737721	-1.35553	0.956049	1	1.00912	1.00912	0.304335	0.567626	0.798483	-1.25238
ATP5SL	28811.8	0.769646	0.946409	1.05319	1.05319	0.761662	0.965889	1.05504	1.05504	0.751581	0.894872	1.05747	1.05747
ATP6AP1	114213	0.0458013	0.20794	1.20025	1.20025	0.368383	0.750124	1.08776	1.08776	0.04568	0.168487	1.20037	1.20037
ATP6AP1L	2199	0.777846	0.949934	0.850074	-1.17637	0.343482	0.727244	1.63521	1.63521	0.919366	0.971414	1.05816	1.05816
ATP6AP2	85369	0.219892	0.554655	1.13889	1.13889	0.901835	1	1.01354	1.01354	0.0518684	0.18472	1.2247	1.2247
ATP6V0A1	44388	0.243118	0.583557	1.22617	1.22617	8.33852e-06	0.000204702	2.02605	2.02605	1.7434e-05	0.000255956	1.98013	1.98013
ATP6V0A2	37225.4	4.87634e-05	0.000804123	0.894404	-1.11806	1.14068e-14	1.29593e-12	0.807696	-1.23809	1.5557e-07	3.53488e-06	0.865521	-1.15537
ATP6V0B	56677	0.510673	0.813356	1.08663	1.08663	0.505096	0.844824	0.915887	-1.09184	0.738775	0.887305	1.04345	1.04345
ATP6V0C	115434	0.236253	0.576428	1.11705	1.11705	0.129943	0.447597	1.1509	1.1509	0.00514135	0.0323253	1.28811	1.28811
ATP6V0D1	41670	0.392387	0.731365	1.14845	1.14845	0.112879	0.413003	1.28424	1.28424	0.00792166	0.0453951	1.50019	1.50019
ATP6V0E1	34050	0.259776	0.600744	1.20959	1.20959	0.374931	0.756237	1.16319	1.16319	0.283313	0.546463	1.19904	1.19904
ATP6V0E2	63694.1	0.0402324	0.190267	1.29285	1.29285	0.768954	0.967502	0.961321	-1.04024	0.000440998	0.00422221	1.52946	1.52946
ATP6V0E2-AS1	4127.74	0.110063	0.370433	1.1353	1.1353	0.0236129	0.145421	0.837702	-1.19374	0.110876	0.313089	1.1366	1.1366
ATP6V1A	106535	0.866724	0.982461	0.983626	-1.01665	0.0397256	0.210545	1.21223	1.21223	0.098471	0.288014	1.16874	1.16874
ATP6V1B1	1231	0.312978	0.658004	0.698592	-1.43145	0.280936	0.665601	0.668944	-1.49489	0.608177	0.813476	0.842135	-1.18746
ATP6V1B2	65205	0.213676	0.545452	1.16839	1.16839	0.693564	0.938675	1.05186	1.05186	0.00157926	0.0123097	1.45779	1.45779
ATP6V1C1	55275	0.0361722	0.176358	1.31857	1.31857	0.626891	0.906382	0.932716	-1.07214	0.00580322	0.0352943	1.43041	1.43041
ATP6V1C2	5037.97	0.0297326	0.152992	0.783668	-1.27605	0.0645545	0.290592	0.810943	-1.23313	0.132804	0.351235	0.846003	-1.18203
ATP6V1D	31269	0.143445	0.434922	1.30718	1.30718	0.671696	0.92798	1.08435	1.08435	0.00476136	0.0303364	1.63832	1.63832
ATP6V1E1	41502.6	0.434186	0.761839	1.12781	1.12781	0.840555	0.990012	1.03211	1.03211	0.08837	0.267273	1.28948	1.28948
ATP6V1E2	4224	3.91188e-05	0.000671133	1.75331	1.75331	7.51711e-05	0.00136771	1.72121	1.72121	1.30236e-06	2.48045e-05	1.93796	1.93796
ATP6V1F	51583.7	0.0210223	0.117909	1.38148	1.38148	0.234235	0.613715	1.18788	1.18788	0.00444343	0.0286355	1.48103	1.48103
ATP6V1G1	51247	0.920954	0.995721	0.986502	-1.01368	0.569219	0.880899	0.923786	-1.0825	0.29253	0.556931	1.14903	1.14903
ATP6V1G2	5235.1	0.940242	1	0.922058	-1.08453	0.805469	0.979424	1.30892	1.30892	0.0417213	0.157846	21.006	21.006
ATP6V1G2-DDX39B	16067.9	0.373202	0.717154	0.719626	-1.38961	0.782929	0.972552	0.907204	-1.10229	0.00286805	0.0201165	2.71324	2.71324
ATP6V1H	40867.7	0.478651	0.79252	1.11866	1.11866	0.225809	0.60391	1.20726	1.20726	0.0988378	0.288784	1.28789	1.28789
ATP7A	51066.1	7.56762e-13	4.86482e-11	2.67933	2.67933	0.343463	0.727244	1.1636	1.1636	0.029896	0.124377	1.39611	1.39611
ATP7B	18169	0.0275034	0.14401	1.73098	1.73098	0.0488737	0.241986	1.64079	1.64079	0.0182715	0.0862215	1.79275	1.79275
ATP8A1	44772.3	0.130568	0.410133	0.792779	-1.26139	0.183469	0.544278	1.20188	1.20188	0.758349	0.898551	0.956067	-1.04595
ATP8A2	3830	0.450238	0.772645	0.588056	-1.70052	0.676885	0.929815	0.762493	-1.31149	0.0255891	0.111218	3.01706	3.01706
ATP8B1	1053.45	0.864559	0.981205	1.18054	1.18054	0.579919	0.886736	1.65362	1.65362	0.911575	0.968108	1.11721	1.11721
ATP8B2	41244.9	0.85487	0.97848	1.02772	1.02772	0.851318	0.993336	1.02842	1.02842	0.959979	0.987209	1.00757	1.00757
ATP8B3	3848	0.802958	0.960495	0.853615	-1.17149	0.0223621	0.13952	3.0995	3.0995	0.689607	0.862232	1.25902	1.25902
ATP8B4	470	0.763159	0.943914	1.08499	1.08499	0.0374307	0.202782	1.88379	1.88379	0.586178	0.799059	1.17849	1.17849
ATP8B5P	1681.23	3.55455e-05	0.000616322	1.49598	1.49598	0.120141	0.426489	1.15759	1.15759	4.12147e-10	1.44852e-08	1.88678	1.88678
ATP9A	79645.4	0.00763351	0.0545	0.716539	-1.3956	0.176836	0.534997	0.851493	-1.17441	6.05514e-08	1.49587e-06	1.73202	1.73202
ATP9B	12057.6	0.451861	0.774273	1.08625	1.08625	0.330869	0.715619	1.11267	1.11267	0.110214	0.311779	1.19026	1.19026
ATPAF1	49157	0.615712	0.870281	1.06785	1.06785	0.515278	0.8511	0.91534	-1.09249	0.618802	0.820273	1.06731	1.06731
ATPAF2	8090	2.87184e-08	9.86268e-07	1.40755	1.40755	0.000418363	0.00576126	1.24291	1.24291	2.68522e-09	8.31568e-08	1.44676	1.44676
ATPIF1	56736.9	0.507842	0.811691	0.919295	-1.08779	0.534237	0.861991	0.924148	-1.08208	0.840785	0.937987	0.975157	-1.02548
ATR	59077	0.035448	0.173911	1.30165	1.30165	0.272214	0.656303	1.15192	1.15192	0.223312	0.483429	1.16926	1.16926
ATRAID	34611.3	0.843549	0.975229	0.96813	-1.03292	0.969886	1	1.00616	1.00616	0.863497	0.947773	1.02822	1.02822
ATRIP	15653	0.737598	0.934957	1.06435	1.06435	0.394658	0.772903	0.847125	-1.18046	0.620719	0.820676	0.909388	-1.09964
ATRN	62039.2	0.266803	0.610017	1.15301	1.15301	0.0755871	0.321432	1.25064	1.25064	0.0166634	0.0805588	1.34532	1.34532
ATRNL1	3023	0.0305296	0.155671	15.492	15.492	0.431361	0.798305	3.04402	3.04402	0.0206104	0.0942764	18.5739	18.5739
ATRX	179680	0.331038	0.676441	0.933303	-1.07146	0.30588	0.692255	0.929804	-1.0755	0.257833	0.518446	0.922568	-1.08393
ATXN1	7952.47	0.0158254	0.0959788	2.87087	2.87087	0.0856775	0.345771	2.18371	2.18371	0.00303929	0.021001	3.53781	3.53781
ATXN10	101077	0.0117746	0.0764662	0.788675	-1.26795	0.00132682	0.0148072	0.734366	-1.36172	0.186558	0.435686	0.886397	-1.12816
ATXN1L	45201	0.985939	1	1.00218	1.00218	0.942756	1	1.00886	1.00886	0.962953	0.987869	1.00617	1.00617
ATXN2	62107.8	0.00193709	0.0180854	1.46441	1.46441	0.288885	0.674989	1.14754	1.14754	0.0778958	0.245075	1.25146	1.25146
ATXN2L	189246	0.184779	0.503733	1.09791	1.09791	0.268232	0.652093	1.08141	1.08141	0.260142	0.521592	1.08283	1.08283
ATXN3	17665.8	0.212441	0.543649	0.75235	-1.32917	0.798014	0.97852	0.946593	-1.05642	0.176153	0.42014	0.732645	-1.36492
ATXN7	34445	0.718343	0.926072	1.06158	1.06158	0.420403	0.789142	1.14025	1.14025	0.884507	0.956425	1.02457	1.02457
ATXN7L1	7430	0.98965	1	0.995655	-1.00436	0.526231	0.856632	1.10392	1.10392	0.393323	0.650909	1.14268	1.14268
ATXN7L2	7737	0.276603	0.619963	1.19404	1.19404	0.0926713	0.363706	1.3116	1.3116	0.0325189	0.132376	1.40174	1.40174
ATXN7L3	50941.2	0.175893	0.490109	0.83408	-1.19893	0.0846963	0.343944	0.790967	-1.26428	0.724002	0.881203	0.95537	-1.04672
ATXN7L3B	83117	0.0283094	0.147331	0.798343	-1.2526	0.000392106	0.00548471	0.683342	-1.4634	0.169559	0.410788	0.871324	-1.14768
ATXN8OS	41.4542	0.918782	0.995583	0.790854	-1.26446	0.294456	0.680554	0.314985	-3.17475	0.543365	0.770138	1.87643	1.87643
AUH	8278	0.143803	0.435392	0.869589	-1.14997	0.33307	0.717193	0.913225	-1.09502	0.00411727	0.0269443	0.756037	-1.32269
AUNIP	13356.2	0.287142	0.631984	0.773464	-1.29289	0.49726	0.841449	0.852271	-1.17334	0.146262	0.375452	0.696594	-1.43556
AUP1	60271	0.0533561	0.230482	1.2748	1.2748	0.261148	0.643287	1.15532	1.15532	0.208991	0.465667	1.17447	1.17447
AURKA	96445.2	0.195616	0.519295	1.1385	1.1385	0.0518966	0.252329	1.21176	1.21176	0.281814	0.544701	1.11451	1.11451
AURKAIP1	68886.7	0.0631988	0.25874	1.23874	1.23874	0.573589	0.883204	1.06941	1.06941	0.432149	0.684718	1.09756	1.09756
AURKAPS1	2126.75	0.706222	0.920046	1.03787	1.03787	0.699858	0.941299	1.03535	1.03535	0.909351	0.966739	0.984418	-1.01583
AURKB	53503.7	0.0407228	0.191704	0.756324	-1.32218	0.229646	0.608424	1.15821	1.15821	0.111361	0.31383	0.807916	-1.23775
AUTS2	36192.7	0.00537702	0.0411403	0.667882	-1.49727	2.57206e-10	1.50032e-08	0.297954	-3.35623	0.00814427	0.0463986	0.683077	-1.46396
AVEN	5364	0.0625013	0.256583	0.645653	-1.54882	0.191661	0.558741	0.741112	-1.34932	0.0998552	0.290757	0.683373	-1.46333
AVIL	759.272	0.974714	1	0.980923	-1.01945	0.573912	0.883474	0.85033	-1.17601	0.38969	0.648465	1.332	1.332
AVL9	18152	0.738787	0.935423	1.07808	1.07808	0.518145	0.852566	1.15425	1.15425	0.509212	0.745861	1.1579	1.1579
AVPI1	4971	0.253126	0.593871	0.852282	-1.17332	0.0229627	0.142404	1.34158	1.34158	0.861866	0.947075	0.971801	-1.02902
AVPR1A	225.002	0.431382	0.760402	2.1062	2.1062	0.860157	0.995056	1.3377	1.3377	0.00551032	0.0341368	29.3768	29.3768
AVPR2	69	0.641973	0.885432	0.753112	-1.32782	0.391944	0.771718	1.64336	1.64336	0.197458	0.450406	0.467418	-2.13941
AWAT2	18	0.29488	0.639257	3.9266	3.9266	0.951579	1	1.42771	1.42771	0.435229	0.687257	1.76959	1.76959
AXDND1	183	0.618771	0.871829	1.1039	1.1039	0.827188	0.987506	1.05632	1.05632	0.060013	0.205458	1.60817	1.60817
AXIN1	45353.5	0.231549	0.570364	0.845263	-1.18306	0.781245	0.972157	0.962994	-1.03843	0.0905823	0.272193	0.784514	-1.27467
AXIN2	8506	0.0891643	0.323318	0.626942	-1.59504	0.460974	0.818891	0.827341	-1.20869	0.384071	0.644052	0.798647	-1.25212
AXL	792	0.934413	0.999715	1.1063	1.1063	0.16123	0.508324	4.43812	4.43812	0.0881603	0.266967	5.56564	5.56564
AZGP1	17	0.0175197	0.103025	0.00226067	-442.346	0.0662577	0.29572	0.0857432	-11.6627	0.723011	0.880872	0.531892	-1.88008
AZI2	23648.9	0.844921	0.975389	0.96285	-1.03858	0.400029	0.776738	0.844908	-1.18356	0.994557	0.998419	1.00144	1.00144
AZIN1	123932	0.59694	0.861693	0.955329	-1.04676	0.211182	0.584685	0.895951	-1.11613	0.712335	0.875345	1.03175	1.03175
AZIN2	2327	0.00707006	0.0514931	0.668092	-1.4968	0.421964	0.790566	0.887733	-1.12646	0.610296	0.814725	1.08124	1.08124
AZU1	241	0.00132514	0.0132069	3.16003	3.16003	0.00181896	0.0192132	2.9569	2.9569	8.47238e-05	0.00102704	6.21915	6.21915
B2M	175245	0.148519	0.444087	1.11518	1.11518	0.00117649	0.0134558	1.26835	1.26835	0.0790952	0.247772	1.14086	1.14086
B3GALNT1	1272	0.596818	0.861693	2.91504	2.91504	0.976592	1	0.742509	-1.34678	0.563593	0.783932	414.387	414.387
B3GALNT2	45930.1	0.0305145	0.155658	0.73515	-1.36027	0.852186	0.993549	1.02456	1.02456	0.0146101	0.0729052	0.703497	-1.42147
B3GALT1	3135	0.0298471	0.153324	4.90377	4.90377	0.608643	0.897838	1.54761	1.54761	0.0257591	0.111787	5.08652	5.08652
B3GALT2	2492	0.820794	0.966329	1.18616	1.18616	0.206833	0.579271	0.0912793	-10.9554	0.0403973	0.154422	3.7258	3.7258
B3GALT4	417	0.107985	0.366534	0.67089	-1.49056	0.0611702	0.280264	1.64392	1.64392	0.512213	0.748179	1.19647	1.19647
B3GALT6	24146	0.325389	0.670793	1.20512	1.20512	0.239625	0.619543	0.779504	-1.28287	0.530884	0.762394	1.12829	1.12829
B3GALTL	11155	0.99752	1	1.00051	1.00051	0.161811	0.509253	0.755237	-1.32409	0.887934	0.957514	1.02687	1.02687
B3GAT1	7248.01	0.404691	0.741574	0.684037	-1.46191	0.194396	0.563098	0.526376	-1.89978	0.00606406	0.0365847	2.56125	2.56125
B3GAT2	1808.28	0.423043	0.756233	1017.8	1017.8	0.530943	0.859795	225.772	225.772	0.566078	0.785635	143.717	143.717
B3GAT3	37077.7	0.859178	0.979463	1.02759	1.02759	0.553179	0.871767	0.910502	-1.0983	0.596064	0.80595	0.919811	-1.08718
B3GNT1	37968	0.0863811	0.31699	1.31695	1.31695	0.996868	1	1.00067	1.00067	0.0153656	0.0758421	1.46331	1.46331
B3GNT2	9893	1.65661e-13	1.14388e-11	0.741285	-1.34901	0.716755	0.947462	0.987378	-1.01278	9.91633e-10	3.27322e-08	0.787001	-1.27065
B3GNT4	1396	0.927043	0.997953	0.958476	-1.04332	0.254761	0.637017	1.9416	1.9416	0.580447	0.795798	1.40587	1.40587
B3GNT5	44089	0.19498	0.518523	1.1281	1.1281	0.0248755	0.151085	0.799843	-1.25025	0.0138142	0.0698973	0.781403	-1.27975
B3GNT7	118	0.216685	0.549503	0.492558	-2.03022	0.112385	0.412029	2.47629	2.47629	0.416392	0.671125	1.88367	1.88367
B3GNT8	111	0.539125	0.827933	0.834609	-1.19817	0.259494	0.641439	0.700096	-1.42838	0.70191	0.869478	1.14218	1.14218
B3GNT9	1280.52	0.00719623	0.052198	1.32507	1.32507	0.333334	0.717523	1.10328	1.10328	0.0578482	0.200252	1.22002	1.22002
B3GNTL1	2825	0.241161	0.581473	1.23285	1.23285	0.000973823	0.0115242	1.77557	1.77557	0.00305801	0.0210931	1.69848	1.69848
B4GALNT1	21846.2	0.036409	0.177058	1.52589	1.52589	0.262519	0.644295	1.26496	1.26496	0.00384143	0.0254459	1.7659	1.7659
B4GALNT2	17	1	1	1	-1	5.38013e-05	0.00104299	662.09	662.09	0.000242437	0.00251457	79.0935	79.0935
B4GALNT3	11969	0.0847988	0.312803	0.644031	-1.55272	0.0221628	0.138542	0.539466	-1.85369	0.0264594	0.113786	0.552057	-1.81141
B4GALNT4	33634	0.026856	0.141606	0.692932	-1.44314	0.0708543	0.309607	0.746027	-1.34043	0.17649	0.420686	0.807001	-1.23916
B4GALT1	28931.3	0.268737	0.611994	1.23298	1.23298	0.0304718	0.1744	1.48294	1.48294	0.238131	0.495667	1.24951	1.24951
B4GALT1-AS1	65.7191	0.679814	0.906272	0.691969	-1.44515	0.90447	1	0.907622	-1.10178	0.715323	0.876537	1.91289	1.91289
B4GALT2	54880.9	0.652176	0.890703	1.04978	1.04978	0.193396	0.561288	0.863801	-1.15767	0.822436	0.929255	0.975684	-1.02492
B4GALT3	30768.1	0.198369	0.523333	1.25366	1.25366	0.508044	0.846278	1.12655	1.12655	0.223516	0.483597	1.23915	1.23915
B4GALT4	14191.4	0.345295	0.689566	0.9529	-1.04943	3.9719e-06	0.000105953	1.26298	1.26298	0.419163	0.672872	0.960105	-1.04155
B4GALT4-AS1	82.612	0.360247	0.704644	0.774278	-1.29153	0.438646	0.803528	0.853255	-1.17198	0.685573	0.859373	0.895765	-1.11636
B4GALT5	69126.8	0.556446	0.838529	1.07379	1.07379	0.0670526	0.298157	1.23917	1.23917	0.186019	0.435068	1.16987	1.16987
B4GALT6	28154	0.904722	0.991908	0.976186	-1.02439	4.50005e-05	0.000894563	2.02494	2.02494	0.434202	0.686302	0.849453	-1.17723
B4GALT7	10474	0.218503	0.552764	1.26237	1.26237	0.530293	0.859284	1.12923	1.12923	0.129023	0.34495	1.32931	1.32931
B9D1	10150.7	0.15393	0.453516	1.60043	1.60043	0.0404452	0.213432	1.92306	1.92306	0.228226	0.486331	1.49611	1.49611
B9D2	2443.8	0.583546	0.85298	1.10229	1.10229	0.657082	0.920466	0.915661	-1.09211	0.380801	0.641474	1.16237	1.16237
BAALC	2372.99	0.1574	0.460212	0.0664088	-15.0583	0.160093	0.505971	0.084679	-11.8093	0.417621	0.671929	3.38931	3.38931
BAALC-AS1	22	0.806031	0.961673	1.04032	1.04032	0.24293	0.622571	0.399024	-2.50611	0.389837	0.648578	0.534362	-1.87139
BAALCOS	15	0.280534	0.625297	0.55764	-1.79327	0.968121	1	0.906421	-1.10324	0.991333	0.997356	1.01429	1.01429
BAAT	175	0.454256	0.775928	1.5969	1.5969	0.159077	0.504031	0.48627	-2.05647	0.093056	0.277314	2.32196	2.32196
BABAM1	44585.1	0.836939	0.972236	0.970816	-1.03006	0.774472	0.969639	1.04129	1.04129	0.941688	0.980857	0.989574	-1.01054
BACE1	55080	0.383741	0.724861	1.11266	1.11266	0.902457	1	1.01547	1.01547	0.348213	0.610899	0.885516	-1.12929
BACE1-AS	1974.83	0.313931	0.658839	1.18005	1.18005	0.915217	1	1.01261	1.01261	0.875026	0.952531	1.0189	1.0189
BACE2	1120	1.33291e-17	1.3289e-15	79.17	79.17	5.92487e-06	0.000150949	9.32059	9.32059	1.76608e-26	2.85215e-24	234.601	234.601
BACH1	24080.1	0.724068	0.929084	0.93503	-1.06948	0.255849	0.638232	0.797981	-1.25316	0.745546	0.890835	0.940174	-1.06363
BACH1-IT2	35	0.830748	0.969463	1.6616	1.6616	0.968305	1	1.2403	1.2403	0.175873	0.419815	0.463794	-2.15613
BACH2	3671.03	0.360644	0.70485	0.440635	-2.26945	0.661864	0.923358	1.33327	1.33327	0.0158124	0.077383	3.88524	3.88524
BAD	17910.7	0.512388	0.814097	1.02662	1.02662	0.0603003	0.277515	1.08021	1.08021	8.72133e-07	1.72843e-05	1.22593	1.22593
BAG1	31956	0.794022	0.95642	0.959291	-1.04244	0.051614	0.25133	0.71479	-1.39901	0.132697	0.351143	0.776213	-1.28831
BAG2	32433	0.20953	0.54002	0.813457	-1.22932	0.56251	0.877531	0.911731	-1.09681	0.0326053	0.132544	0.691973	-1.44514
BAG3	28282	0.30078	0.645369	1.19015	1.19015	0.287987	0.674361	1.19554	1.19554	0.49674	0.736311	1.12287	1.12287
BAG4	36952.3	0.712422	0.92401	0.959519	-1.04219	0.85849	0.99464	1.02028	1.02028	0.359759	0.621743	0.899887	-1.11125
BAG5	46955.9	0.85977	0.979833	0.980501	-1.01989	0.701294	0.941677	0.958174	-1.04365	0.473002	0.718265	0.921799	-1.08484
BAG6	195927	0.215401	0.54764	0.91856	-1.08866	0.657538	0.920793	0.970472	-1.03043	0.492714	0.732981	0.954496	-1.04767
BAHCC1	28584	5.2979e-05	0.000866329	0.455205	-2.19681	0.684151	0.932872	0.938291	-1.06577	0.000485011	0.00459631	0.522862	-1.91255
BAHD1	48397.9	0.203244	0.530395	1.19085	1.19085	0.502974	0.843476	1.09824	1.09824	0.47262	0.717876	1.10556	1.10556
BAI1	21057	0.337558	0.683235	0.835889	-1.19633	1.88011e-07	6.81617e-06	0.199653	-5.0087	0.355683	0.618012	0.841743	-1.18801
BAI2	28618	0.605752	0.865589	1.10198	1.10198	0.519584	0.853	0.879646	-1.13682	0.0152889	0.075559	1.52946	1.52946
BAI3	6691	0.494383	0.802546	1.29542	1.29542	0.122543	0.431392	0.00765297	-130.668	0.0230602	0.102647	2.18383	2.18383
BAIAP2	14267	0.407763	0.744568	0.807007	-1.23915	0.834361	0.98862	1.05182	1.05182	0.742818	0.889954	0.92144	-1.08526
BAIAP2-AS1	9973	0.809727	0.962984	1.08242	1.08242	0.374005	0.755592	1.3226	1.3226	0.0761298	0.241698	1.70057	1.70057
BAIAP2L1	23121.2	0.0406264	0.191486	0.617851	-1.61851	0.00449066	0.0399781	1.68439	1.68439	0.627297	0.823846	0.90263	-1.10787
BAIAP2L2	928	0.784715	0.95391	0.915709	-1.09205	0.445508	0.809191	1.17919	1.17919	0.178451	0.423603	1.36622	1.36622
BAIAP3	1723.3	0.882266	0.98646	1.19466	1.19466	0.628736	0.906896	1.71488	1.71488	0.0529801	0.187483	6.37095	6.37095
BAK1	23868	0.523352	0.818563	1.13173	1.13173	0.943931	1	0.985993	-1.01421	0.88786	0.957488	1.02837	1.02837
BAMBI	2331	0.492824	0.801388	0.681427	-1.46751	0.321697	0.707892	0.554313	-1.80404	0.6141	0.81717	0.764369	-1.30827
BANCR	11	0.292885	0.637334	2.12598	2.12598	0.638864	0.912443	1.43914	1.43914	0.765394	0.900727	0.854435	-1.17036
BANF1	107620	0.440229	0.765485	1.07402	1.07402	0.915328	1	1.01004	1.01004	0.571783	0.789475	1.05396	1.05396
BANK1	315	0.999732	1	1.01392	1.01392	0.577621	0.886296	0.13297	-7.52048	0.451594	0.7004	3.84253	3.84253
BANP	10783.9	0.84665	0.975654	0.978734	-1.02173	0.8733	0.995992	0.980243	-1.02015	0.87444	0.95247	1.01974	1.01974
BAP1	75241.5	0.313186	0.658203	1.11705	1.11705	0.814501	0.982786	1.02663	1.02663	0.894366	0.960151	1.01502	1.01502
BARD1	22850.1	3.80333e-06	8.61193e-05	0.657745	-1.52035	0.205299	0.577144	0.89674	-1.11515	0.00147643	0.0115913	0.754405	-1.32555
BARHL1	29	0.146916	0.440968	0.41749	-2.39527	0.636792	0.911414	1.28346	1.28346	0.51432	0.749857	0.813757	-1.22887
BARHL2	1547	0.0961895	0.340947	1.42306	1.42306	0.578515	0.886296	1.13509	1.13509	0.0543897	0.191397	1.50382	1.50382
BARX1	141	0.815836	0.964619	0.905305	-1.1046	0.141104	0.470691	3.44037	3.44037	0.875166	0.952559	1.07594	1.07594
BASP1	60281.7	0.000672617	0.00753215	0.0353074	-28.3227	0.418802	0.788209	0.476986	-2.0965	0.730006	0.883886	1.032	1.032
BASP1P1	65.0044	0.0533643	0.230482	4.23383	4.23383	0.615784	0.900811	0.871786	-1.14707	0.232905	0.489392	2.05226	2.05226
BATF2	118	0.634152	0.880732	1.16966	1.16966	0.055812	0.264495	2.15427	2.15427	0.193102	0.444139	1.72705	1.72705
BATF3	4373	0.00610234	0.0456881	1.26258	1.26258	3.12684e-05	0.000658421	0.698961	-1.43069	0.866402	0.948936	1.01837	1.01837
BAX	29376.1	0.487567	0.797177	1.12849	1.12849	0.795466	0.977684	0.954045	-1.04817	0.884249	0.956425	1.02626	1.02626
BAZ1A	109360	2.4427e-05	0.000452015	0.696061	-1.43666	1.06516e-06	3.30912e-05	0.652413	-1.53277	3.45858e-10	1.2288e-08	0.56255	-1.77762
BAZ1B	244070	0.550334	0.834815	1.03663	1.03663	0.554035	0.872042	0.964355	-1.03696	0.196615	0.449152	0.923023	-1.0834
BAZ2A	158823	0.115134	0.381017	1.13232	1.13232	0.000412418	0.00570351	1.30946	1.30946	0.182405	0.429442	1.11141	1.11141
BAZ2B	37989.1	0.607695	0.866673	1.08037	1.08037	0.0346439	0.191087	0.699567	-1.42946	0.633944	0.828401	1.07445	1.07445
BBC3	7899.98	0.819849	0.966147	0.918984	-1.08816	0.201114	0.572547	1.52562	1.52562	0.830858	0.933467	1.07911	1.07911
BBIP1	7901.15	0.184902	0.503877	0.639949	-1.56262	0.254272	0.63637	0.686733	-1.45617	0.270781	0.533346	0.696848	-1.43503
BBOX1	26	0.498174	0.804996	49.5413	49.5413	1	1	1	-1	0.29543	0.560218	828.568	828.568
BBS1	15640	0.701506	0.916747	1.057	1.057	0.36787	0.749901	1.1387	1.1387	0.234654	0.490883	1.18434	1.18434
BBS10	17016	0.768534	0.945713	0.963442	-1.03794	0.118371	0.422809	0.808646	-1.23663	0.328256	0.589455	0.877268	-1.1399
BBS12	2820	0.0541809	0.232692	1.29199	1.29199	0.308866	0.694157	1.1528	1.1528	0.000543991	0.00505715	1.58606	1.58606
BBS2	20497	0.18957	0.510073	1.2324	1.2324	0.0697279	0.306405	1.32962	1.32962	0.000367218	0.00360775	1.712	1.712
BBS4	31103.2	3.41896e-57	3.51631e-54	2.68654	2.68654	4.31917e-23	1.14055e-20	1.87274	1.87274	1.23304e-87	1.74474e-84	3.38066	3.38066
BBS5	7806.89	6.34391e-11	3.20392e-09	1.53549	1.53549	5.03686e-05	0.000989199	1.30702	1.30702	4.68603e-09	1.41093e-07	1.47127	1.47127
BBS7	16411	0.349266	0.694022	0.939837	-1.06401	0.796925	0.978477	0.98356	-1.01672	0.4097	0.665056	1.05654	1.05654
BBS9	5218.99	0.00753714	0.0540093	0.750609	-1.33225	0.00111835	0.0129083	0.702145	-1.42421	0.972755	0.990393	0.999156	-1.00084
BBX	104925	0.445794	0.769209	1.07337	1.07337	0.526778	0.856929	1.06071	1.06071	0.561728	0.782878	0.945911	-1.05718
BCAM	21335	0.00113264	0.0116122	0.477728	-2.09324	0.68717	0.934815	1.07487	1.07487	0.00460328	0.029483	0.539202	-1.85459
BCAN	2024	0.684387	0.907464	1.78768	1.78768	0.281175	0.665831	3.9743	3.9743	0.0244963	0.107545	14.6384	14.6384
BCAP29	25591.9	0.123411	0.397367	1.36398	1.36398	0.148666	0.484999	1.33927	1.33927	0.063088	0.212812	1.44766	1.44766
BCAP31	99923.1	0.0821289	0.306567	0.846802	-1.18091	0.739083	0.956768	0.969721	-1.03122	0.0387627	0.149578	0.819153	-1.22077
BCAR1	31413.3	0.730171	0.931598	0.951089	-1.05143	0.404677	0.780168	0.884061	-1.13114	0.78247	0.909376	1.04025	1.04025
BCAR3	2345.09	0.100617	0.349228	2.40247	2.40247	0.239505	0.619398	1.91228	1.91228	0.00885011	0.0494256	3.79111	3.79111
BCAR4	10	0.969404	1	1.07721	1.07721	0.39582	0.773781	1.20759	1.20759	0.930446	0.976312	1.21204	1.21204
BCAS1	111.235	0.617887	0.871346	1.30579	1.30579	0.176913	0.535101	1.94708	1.94708	0.578928	0.794832	0.885014	-1.12993
BCAS2	31506	0.760372	0.942958	1.05391	1.05391	0.911511	1	0.980713	-1.01967	0.664991	0.846497	1.07698	1.07698
BCAS3	6255.01	0.0246482	0.132431	1.25005	1.25005	0.67253	0.928298	0.958556	-1.04324	2.19163e-09	6.88532e-08	1.79079	1.79079
BCAS4	12512	0.958035	1	1.01455	1.01455	0.445482	0.809191	1.21921	1.21921	0.584537	0.79827	1.15501	1.15501
BCAT1	225363	1.1122e-09	4.73497e-08	0.663489	-1.50718	0.10606	0.397387	1.09968	1.09968	3.7576e-05	0.000500527	0.766319	-1.30494
BCAT2	34036.1	0.174015	0.487042	1.25725	1.25725	0.151905	0.491373	1.2721	1.2721	0.380428	0.641114	1.16227	1.16227
BCCIP	116486	0.146741	0.440674	1.13512	1.13512	0.243871	0.623963	0.897719	-1.11393	0.543837	0.770493	1.05543	1.05543
BCDIN3D	5741.93	0.429327	0.759281	0.911181	-1.09748	0.0462293	0.232835	0.785706	-1.27274	0.982589	0.99422	0.996597	-1.00341
BCDIN3D-AS1	1970.07	0.0683896	0.273052	0.787634	-1.26962	0.679803	0.931237	0.944305	-1.05898	0.342549	0.604667	1.12749	1.12749
BCHE	6873	0.132621	0.414052	0.630312	-1.58651	0.00380263	0.0351002	0.0206715	-48.3759	0.084129	0.258688	0.5805	-1.72265
BCKDHA	25446.3	0.424658	0.7572	0.85921	-1.16386	0.669299	0.926553	1.07967	1.07967	0.257492	0.51814	0.803176	-1.24506
BCKDHB	22290.9	0.380153	0.722272	1.19831	1.19831	0.862572	0.995222	1.03756	1.03756	0.274074	0.536641	1.25024	1.25024
BCKDK	28169.1	0.314046	0.658839	1.20642	1.20642	0.0556019	0.264001	1.4118	1.4118	0.775525	0.905883	1.0564	1.0564
BCL10	13084.9	0.0628638	0.257855	1.04669	1.04669	0.000108475	0.0018775	1.12924	1.12924	0.000172806	0.00188648	1.12275	1.12275
BCL11A	17001	0.453301	0.775358	0.842532	-1.1869	0.147494	0.482857	0.70622	-1.41599	0.74163	0.889277	0.929229	-1.07616
BCL11B	5800	0.867774	0.982637	0.943208	-1.06021	0.0124617	0.0889082	0.260309	-3.84158	0.625591	0.823042	0.837786	-1.19362
BCL2	8371.99	0.0196101	0.111916	0.441426	-2.26539	0.439957	0.804454	0.798425	-1.25247	0.0421142	0.158994	0.506616	-1.97388
BCL2A1	24.0012	0.28476	0.629966	11.7042	11.7042	0.994572	1	0.954391	-1.04779	0.786993	0.911707	6.51422	6.51422
BCL2L1	32035.6	0.539574	0.82825	1.11699	1.11699	0.197376	0.567029	1.25412	1.25412	0.0850955	0.260472	1.34692	1.34692
BCL2L10	23	0.730414	0.931598	0.535837	-1.86624	0.202568	0.574536	0.404911	-2.46968	0.854119	0.944344	0.698378	-1.43189
BCL2L11	15650.2	0.933322	0.999516	0.980995	-1.01937	0.654074	0.919376	0.899672	-1.11152	0.253855	0.514371	0.75389	-1.32645
BCL2L12	26219.8	0.119353	0.389233	1.34776	1.34776	0.231525	0.610156	1.26182	1.26182	0.314829	0.576202	1.21769	1.21769
BCL2L13	44249	0.992334	1	1.00139	1.00139	0.342151	0.72579	1.1422	1.1422	0.90804	0.966385	1.01687	1.01687
BCL2L14	159	0.882858	0.986487	1.14959	1.14959	0.148019	0.483523	2.09051	2.09051	0.713206	0.875595	0.925835	-1.08011
BCL2L15	493	0.820228	0.966147	0.931482	-1.07356	0.150367	0.488481	0.635501	-1.57356	0.650082	0.838553	0.902823	-1.10764
BCL2L2	25216.7	0.0952269	0.338702	1.07919	1.07919	0.114343	0.415661	1.07428	1.07428	0.00730054	0.0425723	1.12989	1.12989
BCL2L2-PABPN1	105496	0.0206828	0.116559	0.806881	-1.23934	0.118174	0.422628	0.867544	-1.15268	0.0721225	0.232604	0.848295	-1.17884
BCL3	4213	0.443373	0.767945	0.661954	-1.51068	0.19525	0.564094	1.73947	1.73947	0.842076	0.938035	0.906832	-1.10274
BCL6	8747.04	0.542989	0.83075	0.783223	-1.27678	0.00295748	0.0288348	2.54465	2.54465	0.770367	0.903451	0.892966	-1.11986
BCL6B	82	0.652508	0.890969	0.79784	-1.25338	0.453268	0.814166	1.55351	1.55351	0.969406	0.989591	1.1488	1.1488
BCL7A	41629.9	0.963772	1	0.994445	-1.00559	0.0271032	0.160055	0.74936	-1.33447	0.892547	0.959245	0.983921	-1.01634
BCL7B	19146	0.393559	0.732466	1.21028	1.21028	0.772628	0.968872	1.06879	1.06879	0.323601	0.585236	1.24529	1.24529
BCL7C	22471.2	0.396044	0.734329	1.12838	1.12838	0.414756	0.786105	1.12322	1.12322	0.209516	0.465987	1.19441	1.19441
BCL9	56892	0.486664	0.796924	0.917188	-1.09029	0.0803648	0.333406	0.798048	-1.25306	0.654849	0.841149	0.946392	-1.05664
BCL9L	23852.8	0.0525658	0.228061	1.57015	1.57015	0.00043705	0.00594735	2.16744	2.16744	0.00108831	0.00899225	2.06315	2.06315
BCLAF1	279217	0.0246458	0.132431	0.880535	-1.13567	0.00495649	0.0432194	0.851695	-1.17413	0.0211714	0.0963014	0.877545	-1.13954
BCO1	843	1.75364e-11	9.81887e-10	0.345076	-2.89792	0.194932	0.563736	0.85215	-1.1735	1.96601e-07	4.40903e-06	0.469943	-2.12792
BCO2	299	0.75358	0.941117	1.07677	1.07677	0.199928	0.570753	0.731667	-1.36674	0.118644	0.326954	1.53465	1.53465
BCOR	132843	0.0692753	0.275256	0.85854	-1.16477	0.506578	0.845385	1.05433	1.05433	0.031506	0.129531	0.833591	-1.19963
BCORL1	219860	0.0683993	0.273052	0.823885	-1.21376	0.00144969	0.015897	1.37632	1.37632	0.0823431	0.254478	0.834902	-1.19774
BCR	29752.7	0.164991	0.472532	1.31527	1.31527	0.373853	0.755592	1.19631	1.19631	0.000119142	0.00137597	2.01437	2.01437
BCRP2	1211.51	0.0182924	0.106195	1.90526	1.90526	0.377814	0.758265	1.26644	1.26644	0.0682875	0.224308	1.65771	1.65771
BCRP3	353.814	0.854599	0.97848	1.14915	1.14915	0.905382	1	1.06473	1.06473	0.766982	0.901549	1.25874	1.25874
BCS1L	27994.9	0.0589935	0.247012	1.41588	1.41588	0.686759	0.934713	1.08205	1.08205	0.129338	0.345432	1.32731	1.32731
BCYRN1	19	0.881977	0.986334	1.07763	1.07763	0.403797	0.779343	1.58387	1.58387	0.570613	0.788512	0.918206	-1.08908
BDH1	18485	0.478257	0.792256	0.856376	-1.16771	0.827554	0.987506	0.954766	-1.04738	0.186525	0.435686	0.740241	-1.35091
BDH2	10440	0.0375675	0.181665	0.558065	-1.79191	0.0393495	0.209175	0.56221	-1.7787	0.169416	0.410536	0.69732	-1.43406
BDKRB2	14	0.347579	0.692007	201.696	201.696	0.404224	0.779526	96.2898	96.2898	0.113189	0.316829	301.486	301.486
BDNF	166.636	0.525146	0.819628	0.65414	-1.52873	0.982722	1	0.977385	-1.02314	0.191358	0.441688	6.07207	6.07207
BDNF-AS	370.364	0.851218	0.977703	1.15555	1.15555	0.439926	0.804454	0.775607	-1.28931	0.0119219	0.0622979	2.41246	2.41246
BDP1	85978	0.108576	0.367171	1.18126	1.18126	0.524899	0.856459	1.06989	1.06989	0.379915	0.640563	1.09718	1.09718
BEAN1	538.916	0.483963	0.795384	2.05173	2.05173	0.368313	0.750124	2.40408	2.40408	0.00347186	0.0235079	33.5619	33.5619
BECN1	29597.4	0.957427	1	1.00951	1.00951	0.757115	0.965081	1.05573	1.05573	0.958857	0.986882	1.00921	1.00921
BEGAIN	1071	0.476997	0.791837	0.329996	-3.03034	0.919462	1	1.11637	1.11637	0.0818066	0.253614	5.36685	5.36685
BEND3	40830.9	0.0371613	0.180325	1.37928	1.37928	0.479848	0.831268	1.12095	1.12095	0.0350993	0.13986	1.3839	1.3839
BEND3P3	5208.58	0.681501	0.906489	0.842205	-1.18736	0.551358	0.871196	0.774614	-1.29097	0.974536	0.991018	1.01262	1.01262
BEND4	74285.1	0.0498679	0.220379	0.800423	-1.24934	0.0782369	0.328639	1.19788	1.19788	0.00239945	0.0173593	0.698906	-1.43081
BEND5	1320	0.151373	0.449572	0.198934	-5.02679	0.130037	0.447767	0.0979192	-10.2125	0.876224	0.953039	0.902533	-1.10799
BEND6	1115	0.920893	0.995721	0.906941	-1.10261	0.907913	1	0.896286	-1.11572	0.497747	0.736829	1.79582	1.79582
BEND7	7373.02	0.750143	0.939805	1.07902	1.07902	0.870071	0.995571	0.960576	-1.04104	0.789725	0.913223	1.06643	1.06643
BEST1	215.033	0.117372	0.384892	1.46739	1.46739	0.00807197	0.0636282	2.2483	2.2483	0.011512	0.060684	2.12135	2.12135
BEST2	70	0.52805	0.821677	0.788838	-1.26769	0.88865	0.999698	0.987581	-1.01258	0.404694	0.660828	1.21906	1.21906
BEST3	15	0.340596	0.685459	486.413	486.413	1	1	1	-1	0.413329	0.668172	166.514	166.514
BEST4	96	0.52727	0.821236	1.09793	1.09793	0.437665	0.803119	1.19965	1.19965	0.208508	0.465035	1.83857	1.83857
BET1	12026	0.686108	0.908718	0.899342	-1.11192	0.628442	0.906732	0.880113	-1.13622	0.427875	0.681538	0.807622	-1.2382
BET1L	32133	0.171007	0.481853	1.27101	1.27101	0.198045	0.56803	1.25375	1.25375	0.191829	0.442456	1.25754	1.25754
BEX1	2296.07	0.982244	1	1.29486	1.29486	0.979444	1	0.741655	-1.34834	0.600112	0.808354	502.088	502.088
BEX2	1529.93	0.646625	0.888312	0.359451	-2.78202	0.0908626	0.358768	0.0598868	-16.6982	0.477446	0.721784	39.5516	39.5516
BEX4	28827.5	0.0819036	0.30596	0.70753	-1.41337	0.96686	1	1.00754	1.00754	0.244226	0.502572	1.22261	1.22261
BEX5	4863.98	0.0994265	0.346945	0.731914	-1.36628	0.178493	0.538343	0.772142	-1.2951	0.00119902	0.00973815	0.510043	-1.96062
BFAR	63839	0.110457	0.371215	1.21327	1.21327	0.0700665	0.307471	1.24381	1.24381	0.913221	0.968519	1.01386	1.01386
BFSP1	8748	0.000645747	0.00726875	3.65392	3.65392	0.589748	0.891004	1.27434	1.27434	0.0104445	0.0562249	2.73693	2.73693
BGLAP	129.608	0.0283187	0.147331	0.418956	-2.38688	0.933376	1	1.03194	1.03194	0.497612	0.736771	1.30772	1.30772
BGN	225	0.576157	0.849612	167.839	167.839	0.973576	1	0.745038	-1.34221	0.367013	0.628096	31.0484	31.0484
BHLHA15	12	0.750807	0.939805	2.16126	2.16126	0.33212	0.716331	0.808662	-1.23661	0.846214	0.94034	1.56964	1.56964
BHLHA9	10	0.506735	0.810785	1.32736	1.32736	0.836298	0.988874	0.251642	-3.97391	0.939758	0.979984	0.603634	-1.65663
BHLHB9	12447	0.318385	0.663116	0.834665	-1.19809	0.120821	0.427634	0.747674	-1.33748	0.77584	0.906144	1.05113	1.05113
BHLHE22	1669	0.0862904	0.316845	0.00794592	-125.851	0.168898	0.520655	0.00335429	-298.125	0.0422607	0.159363	0.0540147	-18.5135
BHLHE23	61	0.310821	0.655884	3.51355	3.51355	0.978858	1	1.14028	1.14028	0.101759	0.294676	45.1491	45.1491
BHLHE40	16605	0.564665	0.842686	1.2002	1.2002	1.79674e-07	6.56263e-06	3.92953	3.92953	0.0565247	0.197135	1.74988	1.74988
BHLHE40-AS1	33	0.0161878	0.097563	2.668	2.668	0.000809757	0.00993312	9.26288	9.26288	0.0188083	0.08806	2.5417	2.5417
BHLHE41	607	0.895801	0.990732	0.827376	-1.20864	0.686539	0.934674	1.69947	1.69947	0.305756	0.568377	3.62042	3.62042
BHMT	58.2702	0.332443	0.677519	0.620677	-1.61114	0.402741	0.778433	1.73857	1.73857	0.393079	0.650784	1.70743	1.70743
BHMT2	27.7298	0.718858	0.926304	1.13525	1.13525	0.842009	0.990185	1.31548	1.31548	0.344528	0.606689	1.84469	1.84469
BICC1	15896	0.252145	0.593034	0.747725	-1.33739	0.394314	0.772875	1.21077	1.21077	0.446044	0.696011	0.828633	-1.20681
BICD1	23415.1	0.269537	0.612432	0.805413	-1.2416	0.48182	0.832568	0.873826	-1.14439	0.366469	0.627732	0.83942	-1.1913
BICD2	57333.6	0.530224	0.822865	0.925125	-1.08093	0.610592	0.898747	0.939085	-1.06487	0.250992	0.511048	0.865159	-1.15586
BID	19252.1	0.694489	0.913135	1.09054	1.09054	0.790021	0.975533	0.94082	-1.0629	0.235301	0.491766	1.28711	1.28711
BIK	1875	0.791136	0.955593	0.926962	-1.07879	0.120458	0.426735	1.54067	1.54067	0.636618	0.830364	0.884631	-1.13041
BIN1	17538	0.0158304	0.0959797	0.545043	-1.83472	0.252185	0.633251	0.771665	-1.2959	0.806405	0.92205	0.948897	-1.05386
BIN2	42	0.8242	0.967503	4.72795	4.72795	0.935528	1	1.7547	1.7547	0.268877	0.531268	27.7393	27.7393
BIN3	10882	0.85788	0.979086	0.955679	-1.04638	0.412407	0.785691	0.8078	-1.23793	0.847355	0.940912	0.952249	-1.05015
BIN3-IT1	260	0.637843	0.882788	1.18817	1.18817	0.835624	0.988853	0.941626	-1.06199	0.996538	0.999043	0.999708	-1.00029
BIRC2	33950.2	0.175677	0.489647	1.25258	1.25258	0.463916	0.821511	1.13267	1.13267	0.0969844	0.285224	1.31432	1.31432
BIRC3	1321.07	0.30565	0.650976	3.37214	3.37214	0.193997	0.562196	4.43821	4.43821	0.0925801	0.2762	6.49669	6.49669
BIRC5	137282	0.205109	0.533268	1.10579	1.10579	0.209903	0.58352	0.900548	-1.11043	0.556885	0.77929	0.952784	-1.04956
BIRC6	138725	0.402189	0.739301	0.934763	-1.06979	0.53034	0.859284	0.950934	-1.0516	0.176127	0.42014	0.895688	-1.11646
BIVM	33670.5	0.261467	0.603079	1.20395	1.20395	0.639314	0.912752	1.0826	1.0826	0.483992	0.726953	1.12465	1.12465
BIVM-ERCC5	22602.6	0.50639	0.810686	1.12592	1.12592	0.196127	0.565267	1.25375	1.25375	0.162577	0.400688	1.27555	1.27555
BLACAT1	127	0.166455	0.475123	0.0042727	-234.044	0.920702	1	1.74485	1.74485	0.780891	0.908973	15.9868	15.9868
BLCAP	25918.9	0.899644	0.991551	0.972969	-1.02778	0.797968	0.97852	0.945551	-1.05758	0.000855504	0.00736125	1.88454	1.88454
BLK	139	2.52389e-06	5.97085e-05	2420.34	2420.34	4.57239e-06	0.000119932	825.297	825.297	2.39334e-06	4.34245e-05	2781.82	2781.82
BLM	42839.6	6.07708e-08	1.95162e-06	0.769275	-1.29993	2.88954e-06	8.00843e-05	0.798057	-1.25304	5.45557e-09	1.62017e-07	0.753741	-1.32671
BLMH	76464	0.00880804	0.0608191	1.3193	1.3193	0.249861	0.630877	0.874221	-1.14388	0.666555	0.847164	1.04922	1.04922
BLOC1S1	14230.1	0.0512554	0.224318	1.07078	1.07078	5.48632e-09	2.60847e-07	1.23277	1.23277	7.9984e-13	3.96692e-11	1.29636	1.29636
BLOC1S1-RDH5	997.128	0.661109	0.895828	1.45015	1.45015	0.672162	0.92806	0.658889	-1.51771	0.810148	0.924229	1.23457	1.23457
BLOC1S2	22600.1	0.392003	0.731217	1.19721	1.19721	0.600527	0.895447	1.11836	1.11836	0.163917	0.402551	1.33103	1.33103
BLOC1S3	10521	0.613373	0.86928	0.969797	-1.03114	0.11717	0.420903	1.10107	1.10107	0.854077	0.944344	1.01174	1.01174
BLOC1S4	10569	0.84258	0.974759	0.9755	-1.02512	0.824164	0.986161	1.03044	1.03044	0.282409	0.545004	0.871932	-1.14688
BLOC1S5	3092.66	0.769826	0.946409	0.907257	-1.10222	0.161381	0.508635	0.569997	-1.7544	0.843713	0.939061	0.932939	-1.07188
BLOC1S5-TXNDC5	12013.9	0.908384	0.992917	1.03278	1.03278	0.905509	1	0.966609	-1.03454	0.497653	0.736771	1.2016	1.2016
BLOC1S6	74515	0.00397754	0.0322645	1.27702	1.27702	0.589991	0.891086	1.04893	1.04893	0.0036768	0.0245668	1.27977	1.27977
BLVRA	27798.4	0.518609	0.815462	0.891619	-1.12156	0.642637	0.914462	0.921472	-1.08522	0.30954	0.572199	0.831995	-1.20193
BLVRB	15506	0.929565	0.998241	0.977412	-1.02311	0.165928	0.516861	1.39246	1.39246	0.44068	0.69184	1.20921	1.20921
BLZF1	8886	0.348899	0.693574	0.944856	-1.05836	0.911784	1	0.993105	-1.00694	0.925254	0.973949	0.994522	-1.00551
BMF	7315	0.161147	0.466546	0.595715	-1.67866	0.562687	0.877531	0.82314	-1.21486	0.63862	0.831675	0.855471	-1.16895
BMI1	39362.6	0.000801691	0.00873236	0.88482	-1.13017	1.80827e-08	7.95842e-07	0.812609	-1.2306	0.000689628	0.00618166	0.883043	-1.13245
BMP1	18755.9	0.0769896	0.294414	1.19938	1.19938	0.461636	0.819415	1.08028	1.08028	0.0250545	0.109372	1.25892	1.25892
BMP2	2100	0.0546228	0.233863	0.337061	-2.96682	0.0615336	0.281402	0.015915	-62.8337	0.0175611	0.0837999	0.179762	-5.56291
BMP2K	14257.6	0.653041	0.891385	1.12273	1.12273	0.927839	1	1.02401	1.02401	0.366166	0.6275	1.25482	1.25482
BMP3	96	0.318499	0.663116	0.095847	-10.4333	0.145237	0.478386	0.00187296	-533.914	0.604538	0.811072	5.14788	5.14788
BMP4	4148.99	0.0148643	0.0916202	0.3132	-3.19285	0.30767	0.693354	1.39691	1.39691	0.00193749	0.0145561	0.110182	-9.07588
BMP6	1120.33	0.957411	1	0.940319	-1.06347	0.626829	0.906382	1.41942	1.41942	0.282417	0.545004	2.1397	2.1397
BMP7	9294	0.494451	0.802564	4.54031	4.54031	0.104315	0.393061	13.5524	13.5524	0.581812	0.796608	0.562147	-1.7789
BMP8A	1339.56	0.39448	0.73268	1.23124	1.23124	0.312999	0.697461	0.780163	-1.28178	0.13626	0.357499	1.43427	1.43427
BMP8B	10567.2	0.700962	0.916282	1.12309	1.12309	0.296247	0.682444	1.35375	1.35375	0.994707	0.998419	1.00224	1.00224
BMPER	817	0.63022	0.877911	7.36983	7.36983	0.488	0.836125	0.808662	-1.23661	0.203928	0.45899	286.25	286.25
BMPR1A	43353	0.000258231	0.00336631	1.79096	1.79096	0.0839945	0.342945	1.33878	1.33878	3.88638e-05	0.000517157	1.91293	1.91293
BMPR1B	5205	0.632416	0.879413	1.18967	1.18967	0.154477	0.495748	0.52204	-1.91556	0.274628	0.537043	0.624017	-1.60252
BMPR1B-AS1	10	0.912198	0.994436	1.93587	1.93587	0.400966	0.777326	0.00991913	-100.815	0.444046	0.694223	1.55916	1.55916
BMPR2	80874	0.00131724	0.0131596	1.43114	1.43114	0.800347	0.97852	0.969609	-1.03134	2.09672e-06	3.83992e-05	1.6712	1.6712
BMS1	103027	0.528906	0.82236	1.06133	1.06133	0.756229	0.964712	0.97044	-1.03046	0.496484	0.736256	1.06632	1.06632
BMS1P17	2423.72	0.699229	0.915671	1.19342	1.19342	0.960535	1	1.02024	1.02024	0.662694	0.845502	1.22636	1.22636
BMS1P18	2423.72	0.699229	0.915671	1.19342	1.19342	0.960535	1	1.02024	1.02024	0.662694	0.845502	1.22636	1.22636
BMS1P20	10027	0.866214	0.982168	0.965685	-1.03553	0.777218	0.970455	0.939065	-1.06489	0.937061	0.978749	0.982445	-1.01787
BMS1P4	3658.96	0.898666	0.99147	0.941072	-1.06262	0.819844	0.984703	0.895857	-1.11625	0.723687	0.881106	0.841546	-1.18829
BMS1P5	12091.5	0.759422	0.942778	1.08413	1.08413	0.720325	0.94862	0.905927	-1.10384	0.536415	0.765522	0.840244	-1.19013
BMS1P6	7410.71	0.973201	1	1.0116	1.0116	0.944794	1	0.976286	-1.02429	0.692421	0.864022	0.868228	-1.15177
BMX	20	0.214323	0.546309	0.18091	-5.5276	0.181288	0.542004	0.0897241	-11.1453	0.695126	0.865574	0.37291	-2.68161
BNC1	116	0.638306	0.883123	0.852409	-1.17315	0.263659	0.645796	1.74875	1.74875	0.074582	0.2384	2.53308	2.53308
BNC2	5873	0.0220232	0.12219	2.74531	2.74531	0.300441	0.68714	1.64216	1.64216	0.195649	0.447941	1.83557	1.83557
BNIP1	8735.02	0.652064	0.890703	1.11899	1.11899	0.763333	0.966244	0.92371	-1.08259	0.701167	0.868999	1.09917	1.09917
BNIP2	38212	0.973333	1	0.999117	-1.00088	0.285999	0.671881	1.02637	1.02637	6.297e-14	3.56666e-12	0.830069	-1.20472
BNIP3	59800	0.842512	0.974759	0.974102	-1.02659	0.000152343	0.00250054	1.56774	1.56774	0.605877	0.811755	0.933432	-1.07132
BNIP3L	45495	0.0136663	0.085952	0.681722	-1.46687	0.0316406	0.178851	1.32524	1.32524	0.182452	0.429455	0.821704	-1.21698
BNIPL	833	0.0211994	0.118835	1.58536	1.58536	0.903741	1	0.962591	-1.03886	0.162824	0.401107	1.32544	1.32544
BOC	6923.62	0.0270536	0.142379	0.533232	-1.87536	1.4328e-15	1.80634e-13	5.51894	5.51894	0.000259807	0.00267205	0.304821	-3.28061
BOD1	53589.9	0.501365	0.807415	1.09185	1.09185	0.494763	0.840446	0.91086	-1.09786	0.372169	0.633609	1.12283	1.12283
BOD1L1	76697	0.0714373	0.281046	0.817381	-1.22342	0.590661	0.891511	0.943735	-1.05962	0.676054	0.853334	0.956153	-1.04586
BOD1L2	171.044	0.142899	0.433687	1.24529	1.24529	0.212955	0.58646	0.835445	-1.19697	0.251265	0.511352	1.17089	1.17089
BOK	2285.08	0.757519	0.942778	0.715991	-1.39667	0.230065	0.609092	2.6749	2.6749	0.0634424	0.213561	4.23944	4.23944
BOK-AS1	31.9164	0.327488	0.672798	1.16581	1.16581	0.182567	0.54375	3.12014	3.12014	0.152681	0.384923	4.1936	4.1936
BOLA1	235	0.565558	0.842988	1.74581	1.74581	0.713106	0.946036	1.61927	1.61927	0.191564	0.441902	4.73558	4.73558
BOLA2	14682.6	0.240392	0.581017	1.20665	1.20665	0.945966	1	1.0105	1.0105	0.670108	0.849912	1.07261	1.07261
BOLA2B	14682.6	0.240392	0.581017	1.20665	1.20665	0.945966	1	1.0105	1.0105	0.670108	0.849912	1.07261	1.07261
BOLA3	20697.1	0.0994002	0.346916	1.40159	1.40159	0.773586	0.969486	0.937332	-1.06686	0.283686	0.546802	1.25212	1.25212
BOLA3-AS1	6868.02	0.537724	0.827114	1.26476	1.26476	0.36557	0.748442	1.40127	1.40127	0.550755	0.774719	1.25631	1.25631
BOLL	32	0.89368	0.990381	0.875519	-1.14218	0.162443	0.510585	2.16391	2.16391	0.941719	0.980857	0.945172	-1.05801
BOP1	100065	0.183191	0.501292	1.13252	1.13252	0.785772	0.973994	1.02636	1.02636	0.292214	0.556762	0.901006	-1.10987
BORA	29450	0.20508	0.533261	1.27419	1.27419	0.728355	0.951935	1.07158	1.07158	0.00082242	0.00715146	1.81563	1.81563
BPGM	15444.1	0.182513	0.499998	1.43149	1.43149	0.324781	0.711577	1.30995	1.30995	0.0162352	0.0790531	1.85139	1.85139
BPHL	15237	0.653154	0.891387	1.05639	1.05639	0.307793	0.693354	0.879248	-1.13734	0.155421	0.388872	1.1886	1.1886
BPNT1	19800.9	0.022175	0.122809	1.54758	1.54758	0.550025	0.87085	1.12878	1.12878	0.053509	0.188876	1.45119	1.45119
BPTF	158653	0.161814	0.467408	0.898827	-1.11256	0.88682	0.999197	1.01059	1.01059	0.0883843	0.267273	0.877438	-1.13968
BRAF	9609	0.663781	0.897147	1.14716	1.14716	0.547929	0.869999	1.20612	1.20612	0.356132	0.618539	1.3261	1.3261
BRAP	22622	0.673297	0.902455	0.925234	-1.08081	0.656205	0.919752	0.92111	-1.08565	0.564328	0.784264	0.898406	-1.11308
BRAT1	46437	0.0779233	0.296697	1.27908	1.27908	0.711185	0.945577	1.05553	1.05553	0.55707	0.77929	1.08879	1.08879
BRCA1	79452.2	0.303377	0.648326	0.894049	-1.11851	0.442071	0.806612	1.08297	1.08297	0.249169	0.508619	0.881746	-1.13411
BRCA2	47070	0.611311	0.868412	0.930908	-1.07422	0.854068	0.994016	1.02561	1.02561	0.694387	0.865071	0.946372	-1.05667
BRCC3	63884.4	0.230208	0.569052	1.15462	1.15462	0.944982	1	0.991461	-1.00861	0.44467	0.69481	1.09712	1.09712
BRD1	38470.6	0.000755299	0.00828243	0.749122	-1.3349	0.0191683	0.124358	0.821386	-1.21745	0.000822986	0.00715146	0.750869	-1.33179
BRD2	177576	0.531648	0.823865	0.976285	-1.02429	0.391393	0.771185	1.03327	1.03327	0.828791	0.932592	0.991792	-1.00828
BRD3	90003.2	0.00877532	0.0607003	0.768445	-1.30133	0.391439	0.771185	0.921279	-1.08545	0.00350058	0.0236449	0.74362	-1.34477
BRD4	97104.9	0.998397	1	0.999799	-1.0002	0.398531	0.775633	1.08494	1.08494	0.871372	0.951214	1.01602	1.01602
BRD7	70482.3	0.954785	1	1.0039	1.0039	0.0126434	0.0899396	0.831858	-1.20213	0.542708	0.769781	0.957197	-1.04472
BRD7P3	319.381	0.100589	0.34922	1.26581	1.26581	0.905548	1	0.993664	-1.00638	0.423144	0.676927	1.10493	1.10493
BRD8	63875.9	0.0315939	0.15962	0.897267	-1.1145	0.0608958	0.2794	0.910438	-1.09837	0.0193199	0.0899046	0.888641	-1.12531
BRD9	33265.2	0.816461	0.964801	1.03129	1.03129	0.776838	0.970362	1.03826	1.03826	0.977599	0.992204	1.00449	1.00449
BRDT	13.864	0.269386	0.612315	0.0196434	-50.9077	0.269386	0.653294	0.0196434	-50.9077	0.142368	0.368968	8.61795	8.61795
BRE	18036.3	0.588981	0.856728	1.02699	1.02699	0.0844942	0.34355	0.919694	-1.08732	0.00760962	0.0440722	1.13787	1.13787
BRE-AS1	198.891	0.00238508	0.0213597	2.86536	2.86536	0.0282656	0.164828	1.92763	1.92763	0.000971461	0.00820722	3.09821	3.09821
BREA2	57	0.606246	0.865906	0.854501	-1.17027	0.702571	0.941677	1.16759	1.16759	0.164202	0.403098	2.20109	2.20109
BRF1	33753.6	0.786221	0.954492	0.959847	-1.04183	0.530608	0.859399	0.908661	-1.10052	0.692809	0.864263	0.941752	-1.06185
BRF2	9316.42	0.558893	0.839378	1.20257	1.20257	0.757853	0.965081	0.900848	-1.11007	0.443845	0.694223	1.26961	1.26961
BRI3	38826.8	0.782338	0.952783	1.04413	1.04413	0.783419	0.972852	1.04389	1.04389	0.512032	0.748028	1.10631	1.10631
BRI3BP	14940.2	0.980923	1	1.00576	1.00576	0.816377	0.983225	1.05679	1.05679	0.712477	0.875382	0.913449	-1.09475
BRICD5	1769.39	0.321949	0.666795	1.13346	1.13346	0.0876524	0.350987	0.799962	-1.25006	0.89805	0.961788	1.01226	1.01226
BRINP1	3469	0.998112	1	0.972894	-1.02786	0.973319	1	1.4751	1.4751	0.5559	0.778656	1136.43	1136.43
BRINP2	987	0.997279	1	0.97316	-1.02758	0.921748	1	2.19583	2.19583	0.220739	0.480588	638.799	638.799
BRINP3	1451	0.0240296	0.130181	134.501	134.501	0.149687	0.48723	0.14181	-7.05167	0.0349159	0.139243	92.2694	92.2694
BRIP1	36305	2.82987e-43	1.45522e-40	0.662058	-1.51044	8.81803e-25	2.77924e-22	0.738494	-1.35411	1.43609e-55	1.03936e-52	0.622574	-1.60624
BRIX1	55811	0.587547	0.855597	1.07166	1.07166	0.588108	0.890449	0.930924	-1.0742	0.68566	0.859373	1.05323	1.05323
BRK1	61393	0.582482	0.852541	1.07146	1.07146	0.546629	0.868853	1.07849	1.07849	0.256002	0.516257	1.15053	1.15053
BRMS1	25317.2	0.583955	0.853067	1.10635	1.10635	0.49446	0.840446	0.874771	-1.14316	0.768943	0.902349	0.945188	-1.05799
BRMS1L	12683	0.830253	0.969128	0.944605	-1.05864	0.179624	0.539755	0.676103	-1.47906	0.711095	0.874866	1.09952	1.09952
BROX	30147.2	0.951162	1	1.01014	1.01014	0.293193	0.679747	0.833744	-1.19941	0.696218	0.866106	0.936808	-1.06745
BRPF1	25685.5	0.394737	0.733019	0.86415	-1.15721	0.250785	0.631652	0.819043	-1.22094	0.41595	0.670787	0.869848	-1.14963
BRPF3	38406	0.991396	1	0.998381	-1.00162	0.0612423	0.280529	0.736444	-1.35788	0.885309	0.956527	1.02184	1.02184
BRS3	15	0.0967176	0.341888	0.00315095	-317.365	0.378834	0.759105	0.817662	-1.223	0.242018	0.500664	0.107456	-9.30614
BRSK1	10469	0.39299	0.732108	1.47993	1.47993	0.0863131	0.34758	2.09465	2.09465	9.37225e-06	0.000147935	5.56247	5.56247
BRSK2	34275.8	0.689655	0.91043	0.938155	-1.06592	0.104494	0.393662	0.759886	-1.31599	0.907445	0.966079	1.0183	1.0183
BRWD1	76423.8	0.185952	0.50517	0.862576	-1.15932	0.819036	0.984242	1.02476	1.02476	0.452751	0.701214	0.920825	-1.08598
BRWD1-AS1	15	0.47211	0.78854	1.33768	1.33768	0.832933	0.988482	0.589991	-1.69494	0.320902	0.582002	0.203682	-4.90961
BRWD1-IT2	235	0.0441532	0.202969	0.585465	-1.70804	0.750519	0.961268	0.928376	-1.07715	0.473358	0.718439	0.830992	-1.20338
BRWD3	106844	0.25022	0.590667	1.11784	1.11784	0.0635788	0.287816	1.19364	1.19364	0.0193499	0.0900061	1.24729	1.24729
BSCL2	2186.87	0.871258	0.983607	0.884717	-1.13031	0.904626	1	0.914057	-1.09402	0.27411	0.536658	2.00512	2.00512
BSDC1	42162.6	0.310466	0.655658	0.933964	-1.0707	0.941164	1	0.995116	-1.00491	0.107068	0.305434	0.895609	-1.11656
BSG	322503	3.39235e-09	1.33919e-07	0.733066	-1.36413	0.000350619	0.00500472	0.834377	-1.1985	1.0195e-10	3.97647e-09	0.709817	-1.40881
BSN	11530	0.829273	0.968782	1.07507	1.07507	0.938873	1	0.973962	-1.02673	0.00194066	0.0145687	2.43354	2.43354
BSN-AS2	366	0.250553	0.590953	1.43752	1.43752	0.0273146	0.161105	1.99632	1.99632	0.00401772	0.0264166	2.56267	2.56267
BSND	282	0.000654842	0.0073584	15.4271	15.4271	0.67311	0.928518	1.70238	1.70238	1.45054e-05	0.000217203	66.61	66.61
BSPRY	168	0.0758033	0.291252	0.507473	-1.97055	0.631223	0.908301	1.23843	1.23843	0.566504	0.785835	1.31694	1.31694
BST1	1409	0.0532573	0.230346	0.0720659	-13.8762	0.641457	0.914064	0.762916	-1.31076	0.0620923	0.210467	0.0511248	-19.56
BST2	64072	0.475024	0.790592	1.08873	1.08873	0.722937	0.949377	1.04355	1.04355	0.974651	0.991032	1.00386	1.00386
BTAF1	79507	0.477724	0.791992	1.08049	1.08049	0.121893	0.429943	1.17966	1.17966	0.860121	0.946295	1.01967	1.01967
BTBD1	166214	6.48617e-05	0.0010341	1.36553	1.36553	0.0317017	0.179145	1.18854	1.18854	7.12449e-07	1.44419e-05	1.46401	1.46401
BTBD10	17904.9	0.545964	0.832371	1.16305	1.16305	0.178685	0.538717	1.38244	1.38244	0.0677174	0.223001	1.53804	1.53804
BTBD11	2290	0.156066	0.457772	0.255593	-3.91247	0.413461	0.786012	0.551421	-1.81349	0.382937	0.642877	1.61875	1.61875
BTBD16	12	0.970709	1	1.07721	1.07721	0.414431	0.786012	1.20759	1.20759	0.806377	0.92205	2.31252	2.31252
BTBD17	191	0.241616	0.582029	0.277914	-3.59823	0.956707	1	1.46747	1.46747	0.301486	0.565278	32.443	32.443
BTBD18	374	0.434713	0.761842	0.794943	-1.25795	0.140388	0.469607	0.593019	-1.68629	0.299981	0.563799	0.722531	-1.38402
BTBD19	30	0.190609	0.511428	2.37109	2.37109	0.324999	0.71163	1.17129	1.17129	0.158815	0.394533	2.99844	2.99844
BTBD2	100561	0.420755	0.754817	0.92636	-1.07949	0.698115	0.940697	0.964184	-1.03715	0.314618	0.576191	0.908442	-1.10079
BTBD3	37262.2	0.36235	0.706726	0.862448	-1.15949	0.68669	0.934713	1.06408	1.06408	0.867546	0.949519	0.974109	-1.02658
BTBD6	34894.8	0.749883	0.939805	1.05175	1.05175	0.414432	0.786012	0.873362	-1.145	0.94021	0.980249	0.988005	-1.01214
BTBD7	41291.4	0.0843693	0.311547	0.783598	-1.27616	0.0196765	0.126646	0.712833	-1.40285	0.0965063	0.284224	0.791128	-1.26402
BTBD8	491	0.914658	0.994892	1.09569	1.09569	0.87769	0.996484	1.09355	1.09355	0.859782	0.946295	1.14463	1.14463
BTBD9	12245	0.426985	0.758392	1.26411	1.26411	0.629161	0.907047	1.15648	1.15648	0.0561522	0.196186	1.70084	1.70084
BTD	4344.01	0.968561	1	0.99851	-1.00149	0.592628	0.891977	0.983589	-1.01668	0.00638834	0.0381716	1.14302	1.14302
BTF3	313295	0.55273	0.836176	0.968629	-1.03239	0.611674	0.898941	0.973142	-1.0276	0.0620875	0.210467	0.90303	-1.10738
BTF3L4	62008.7	0.263582	0.605858	0.869821	-1.14966	0.763801	0.966297	0.964165	-1.03717	0.995079	0.998605	1.00075	1.00075
BTF3P11	27.0029	0.857933	0.979086	4.57486	4.57486	0.987568	1	1.14044	1.14044	0.744154	0.890477	16.3207	16.3207
BTG1	25153	0.540521	0.828934	1.12015	1.12015	0.581074	0.887197	1.10801	1.10801	0.185363	0.434367	0.762355	-1.31172
BTG2	13946	8.44192e-06	0.00017719	0.482476	-2.07264	6.17566e-05	0.0011671	0.527315	-1.8964	0.000536128	0.00500548	0.58231	-1.7173
BTG3	21235.2	0.00879342	0.060761	0.883613	-1.13172	0.242622	0.62227	0.946165	-1.0569	0.028649	0.120575	0.901814	-1.10888
BTK	22	0.238278	0.578522	195.165	195.165	0.0638268	0.288512	265.436	265.436	0.0495592	0.178777	433.897	433.897
BTLA	73	0.122196	0.394531	0.304496	-3.28411	0.132408	0.453404	3.87388	3.87388	0.525963	0.759003	0.722805	-1.3835
BTN1A1	54	0.777076	0.949822	0.879941	-1.13644	0.620188	0.902971	1.46765	1.46765	0.77233	0.904314	1.38851	1.38851
BTN2A1	20843.2	0.534025	0.825323	1.1194	1.1194	0.750595	0.961285	1.06018	1.06018	0.204373	0.459777	1.25146	1.25146
BTN2A2	11179.1	0.665885	0.898623	1.12568	1.12568	0.873882	0.996006	1.04519	1.04519	0.832073	0.934135	1.06124	1.06124
BTN2A3P	3243.19	0.580014	0.851551	1.31028	1.31028	0.739052	0.956768	1.17956	1.17956	0.585659	0.798981	1.30753	1.30753
BTN3A1	11339	0.0323209	0.162695	2.0242	2.0242	0.0235101	0.145016	2.09972	2.09972	0.024719	0.10834	2.08818	2.08818
BTN3A2	15701.5	0.860008	0.979833	0.957421	-1.04447	0.463701	0.821425	1.18723	1.18723	0.827335	0.931896	0.947491	-1.05542
BTN3A3	5097.95	0.261529	0.603079	1.6481	1.6481	0.340177	0.723723	1.53747	1.53747	0.457313	0.70526	1.40752	1.40752
BTNL9	10118	0.00680522	0.0499927	2.46663	2.46663	0.9499	1	1.02518	1.02518	0.0115412	0.060805	2.33808	2.33808
BTRC	34546.8	0.0236442	0.128628	1.45422	1.45422	0.600859	0.895447	0.908272	-1.10099	0.000807012	0.00704954	1.71174	1.71174
BUB1	111487	0.777342	0.949822	1.02609	1.02609	0.620069	0.902971	1.04597	1.04597	0.944832	0.981903	0.993667	-1.00637
BUB1B	126132	0.259263	0.600311	0.908893	-1.10024	0.755402	0.964265	0.97442	-1.02625	0.110934	0.313089	0.872457	-1.14619
BUB3	132703	0.0212442	0.119017	0.832971	-1.20052	0.233466	0.613045	0.911783	-1.09675	0.00414185	0.0270598	0.794169	-1.25918
BUD13	17008	0.378362	0.720553	0.82598	-1.21068	0.518137	0.852566	0.870482	-1.14879	0.560733	0.782175	0.883022	-1.13247
BUD31	38218.4	0.558924	0.839378	1.09617	1.09617	0.995568	1	0.999105	-1.0009	0.359019	0.621069	1.15305	1.15305
BVES	7559.6	0.000657994	0.00738533	4.61207	4.61207	0.224252	0.601855	1.84303	1.84303	0.000214155	0.00226695	5.18191	5.18191
BVES-AS1	112	0.000446551	0.00533051	20.7617	20.7617	0.00146304	0.0160075	9.89336	9.89336	0.000457547	0.00436143	20.3311	20.3311
BYSL	40235	0.187692	0.507638	1.21445	1.21445	0.597082	0.893998	0.919986	-1.08697	0.826601	0.931684	1.03412	1.03412
BZRAP1	1656.32	0.935825	0.999779	1.27526	1.27526	0.37617	0.757496	0.3891	-2.57004	0.194361	0.445932	283.605	283.605
BZRAP1-AS1	668.029	0.735446	0.934358	1.47877	1.47877	0.805348	0.979419	1.33186	1.33186	0.242668	0.501159	3.62909	3.62909
BZW1	207388	0.188322	0.508288	0.917407	-1.09003	0.0121353	0.0870541	0.845382	-1.1829	0.14516	0.373627	0.908738	-1.10043
BZW2	97133.6	0.0764071	0.292874	0.869977	-1.14946	0.00371513	0.0345047	0.791805	-1.26294	4.50765e-06	7.64335e-05	0.681265	-1.46786
C10orf10	408	0.0601315	0.250059	0.219358	-4.55876	0.988493	1	1.03323	1.03323	0.964135	0.988223	1.12298	1.12298
C10orf105	132.648	0.0700125	0.277245	0.466148	-2.14524	0.0472243	0.236618	0.383271	-2.60912	0.560575	0.782107	0.738294	-1.35447
C10orf107	14	1	1	1	-1	0.000109559	0.00189459	625.162	625.162	1	1	1	-1
C10orf111	578.469	0.111266	0.372812	0.812179	-1.23126	0.205476	0.577196	0.85245	-1.17309	0.195068	0.447085	1.17095	1.17095
C10orf12	17242	0.449652	0.772125	1.18161	1.18161	0.529878	0.859284	0.86066	-1.1619	0.835267	0.935583	0.952792	-1.04955
C10orf128	12	0.462931	0.782064	0.0196434	-50.9077	0.462931	0.82066	0.0196434	-50.9077	0.745523	0.890835	7.1724	7.1724
C10orf131	107	0.899565	0.991551	1.07909	1.07909	0.242339	0.62227	0.676381	-1.47846	0.433675	0.685857	1.30176	1.30176
C10orf2	41391	0.329258	0.674682	1.14599	1.14599	0.14957	0.486962	0.80216	-1.24663	0.190584	0.440817	0.81951	-1.22024
C10orf25	404.088	0.000819781	0.00888482	0.204387	-4.89268	0.00607899	0.0508865	0.292644	-3.41712	0.0167095	0.080652	0.373125	-2.68007
C10orf32	7353.73	0.731073	0.931709	1.13296	1.13296	0.992165	1	1.00368	1.00368	0.545644	0.771745	1.23995	1.23995
C10orf32-ASMT	2736.36	0.830652	0.969463	1.13637	1.13637	0.607391	0.897395	1.34401	1.34401	0.956813	0.986393	1.03365	1.03365
C10orf35	6444	0.676816	0.904138	1.18586	1.18586	0.740911	0.957049	1.14598	1.14598	0.163861	0.402515	1.69822	1.69822
C10orf54	390	5.37379e-05	0.000878004	6.48132	6.48132	2.21979e-05	0.0004852	8.38744	8.38744	3.02549e-06	5.36003e-05	18.8606	18.8606
C10orf55	18.1094	0.0560429	0.238643	0.00473071	-211.385	0.683698	0.93271	2.08043	2.08043	0.268154	0.530257	0.523049	-1.91187
C10orf67	26	0.215609	0.548026	0.115688	-8.64395	0.235606	0.614988	0.169226	-5.90927	0.869849	0.950591	1.00198	1.00198
C10orf71	22	0.801078	0.959853	6.94345	6.94345	0.486228	0.835085	0.00793769	-125.981	0.8639	0.948058	0.270697	-3.69417
C10orf76	26792	0.125051	0.399183	1.07389	1.07389	0.0737754	0.316984	1.08691	1.08691	0.179319	0.425147	1.06423	1.06423
C10orf82	74	0.675601	0.904055	0.697328	-1.43405	0.523822	0.856139	0.528512	-1.8921	0.926735	0.974761	2.25583	2.25583
C10orf85	26	0.00351785	0.0291528	0.00254817	-392.438	0.00351785	0.033081	0.00254817	-392.438	0.923007	0.972814	1.46681	1.46681
C10orf88	12114	0.447454	0.770167	1.1165	1.1165	0.895496	1	1.0192	1.0192	0.290414	0.555282	1.16787	1.16787
C10orf95	2484.63	0.915691	0.995039	0.939055	-1.0649	0.843721	0.990577	1.1186	1.1186	0.737444	0.886905	0.814473	-1.22779
C11orf1	3919.81	0.127394	0.403595	0.643621	-1.55371	0.0894932	0.355525	0.613418	-1.63021	0.427551	0.681172	0.803184	-1.24505
C11orf16	111	0.0137268	0.0861938	1.94102	1.94102	0.946371	1	0.994753	-1.00527	0.0327353	0.132907	1.66109	1.66109
C11orf24	30942.8	0.467256	0.784849	1.13024	1.13024	0.544192	0.86727	0.897493	-1.11421	0.764064	0.899992	1.05274	1.05274
C11orf30	31184.3	0.176182	0.490389	0.795192	-1.25756	0.507593	0.846177	0.897014	-1.11481	0.107562	0.306488	0.758572	-1.31827
C11orf31	49819	0.707982	0.921259	1.0513	1.0513	0.567903	0.880535	0.924227	-1.08199	0.8846	0.956425	1.01973	1.01973
C11orf42	321	0.0990012	0.346379	0.721269	-1.38644	0.053926	0.258975	0.681195	-1.46801	0.743464	0.890307	1.03782	1.03782
C11orf45	3613	0.507654	0.811651	1.37018	1.37018	0.312046	0.6968	1.59452	1.59452	0.661106	0.844523	1.24192	1.24192
C11orf48	3443.63	0.000895257	0.00957014	1.44181	1.44181	0.00114253	0.0131369	1.43728	1.43728	0.0311219	0.128329	1.27044	1.27044
C11orf49	16499.7	0.231912	0.570971	1.33354	1.33354	0.425989	0.794252	1.21573	1.21573	0.0272012	0.115955	1.66451	1.66451
C11orf54	19338	0.242779	0.583366	0.852039	-1.17366	0.593829	0.89296	1.0726	1.0726	0.557008	0.77929	0.924787	-1.08133
C11orf57	40854.3	0.404981	0.741757	0.900898	-1.11	0.0920593	0.36218	0.804999	-1.24224	0.449816	0.699399	0.910043	-1.09885
C11orf58	123648	0.108389	0.367106	0.873423	-1.14492	0.00737394	0.0591277	0.793024	-1.261	0.0892993	0.269082	0.866285	-1.15435
C11orf63	3677	0.00346356	0.0287761	0.845071	-1.18333	0.00130449	0.0145997	0.829785	-1.20513	0.525696	0.758785	1.0366	1.0366
C11orf65	535	0.160063	0.465236	0.701524	-1.42547	0.471289	0.825128	0.847966	-1.17929	0.865337	0.948413	0.972089	-1.02871
C11orf68	13581	0.00851116	0.0592507	1.17753	1.17753	2.53957e-05	0.000547141	1.29739	1.29739	2.73651e-06	4.90138e-05	1.33667	1.33667
C11orf70	233	0.0636991	0.259917	0.44392	-2.25266	0.20288	0.574978	1.88428	1.88428	0.0762796	0.242026	0.436219	-2.29243
C11orf71	6086	1.31675e-05	0.000262289	1.26424	1.26424	0.00818805	0.0642839	1.15315	1.15315	2.81641e-14	1.64777e-12	1.5273	1.5273
C11orf73	18849	0.128044	0.4052	1.08213	1.08213	0.00374826	0.0347297	0.860145	-1.1626	0.557239	0.779345	1.03043	1.03043
C11orf74	6788.53	0.473799	0.789638	0.868201	-1.15181	0.0384792	0.206232	0.650207	-1.53797	0.92706	0.974786	1.01964	1.01964
C11orf80	7608.97	3.87599e-11	2.05259e-09	0.735173	-1.36022	7.90815e-20	1.39219e-17	1.58199	1.58199	0.0676978	0.223001	0.925028	-1.08105
C11orf83	19062.9	0.274074	0.617511	0.847576	-1.17984	0.300394	0.687112	0.854987	-1.16961	0.045954	0.169176	0.732119	-1.3659
C11orf84	45987	0.00138712	0.0137105	0.642328	-1.55684	0.0199661	0.12792	0.73358	-1.36318	0.00196947	0.0147566	0.652857	-1.53173
C11orf86	19	0.0395824	0.188278	395.862	395.862	0.0483236	0.240217	280.931	280.931	0.232875	0.489392	133.411	133.411
C11orf87	1359	0.313512	0.658462	3.89786	3.89786	0.146279	0.480491	20.4474	20.4474	0.0542703	0.191115	863.836	863.836
C11orf91	42	0.0210112	0.117909	5.92014	5.92014	0.0175965	0.116324	6.12306	6.12306	0.0141298	0.0711259	6.50301	6.50301
C11orf94	57	0.244712	0.585231	1.89024	1.89024	0.616228	0.90098	1.22371	1.22371	0.662557	0.845502	1.19245	1.19245
C11orf95	41500	0.171799	0.483191	0.820045	-1.21945	0.0368554	0.200332	0.73128	-1.36747	0.352622	0.614738	0.875862	-1.14173
C11orf96	2582	0.987481	1	0.990588	-1.0095	0.0318059	0.179526	3.71122	3.71122	0.787675	0.911953	1.21679	1.21679
C12orf10	23633	0.676235	0.90412	1.07787	1.07787	0.905856	1	1.02167	1.02167	0.646466	0.836928	1.08539	1.08539
C12orf29	21626.3	0.681331	0.906489	1.08233	1.08233	0.0784084	0.329076	0.681119	-1.46817	0.451434	0.700395	0.857334	-1.16641
C12orf4	25353	0.269993	0.61291	1.23313	1.23313	0.966613	1	0.991651	-1.00842	0.246098	0.504464	1.24596	1.24596
C12orf42	36	2.63657e-09	1.06449e-07	99.7154	99.7154	1	1	1	-1	4.48976e-10	1.56389e-08	1292.92	1292.92
C12orf43	16603.8	0.751093	0.939805	1.07495	1.07495	0.744034	0.958654	0.925895	-1.08004	0.810764	0.924468	1.05613	1.05613
C12orf45	5674	0.601077	0.864158	1.12428	1.12428	0.610976	0.898893	1.11859	1.11859	0.730455	0.884123	1.07966	1.07966
C12orf49	29589	0.690959	0.911192	0.935092	-1.06941	0.416208	0.786885	0.869514	-1.15007	0.854331	0.944372	1.03079	1.03079
C12orf5	20359	0.515481	0.814484	1.14964	1.14964	0.778231	0.971015	1.06343	1.06343	0.539337	0.767603	1.1409	1.1409
C12orf50	15	0.520964	0.817239	2.10834	2.10834	0.843094	0.990495	1.95384	1.95384	0.823405	0.929798	1.92725	1.92725
C12orf56	28	0.0898029	0.325004	0.355378	-2.8139	0.79125	0.976027	0.953195	-1.0491	0.429248	0.682629	0.671823	-1.48849
C12orf57	29396	0.0232456	0.127061	0.679921	-1.47076	0.000807837	0.0099158	0.543077	-1.84136	0.116651	0.323192	0.773396	-1.293
C12orf60	1735	0.00428303	0.0342632	1.49498	1.49498	0.785701	0.973994	0.963161	-1.03825	0.0074949	0.0435627	1.44589	1.44589
C12orf65	21320	0.0736745	0.286161	0.74688	-1.3389	0.399288	0.77618	0.876147	-1.14136	0.0294617	0.123147	0.6971	-1.43451
C12orf66	9328.01	0.764433	0.944336	1.09637	1.09637	0.878717	0.996749	0.952581	-1.04978	0.82392	0.930112	1.07131	1.07131
C12orf71	155	0.289442	0.634078	0.618194	-1.61762	0.351783	0.73505	1.37186	1.37186	0.722764	0.8807	0.83245	-1.20127
C12orf73	8178	0.909032	0.992927	1.03425	1.03425	0.75143	0.961667	0.908831	-1.10031	0.696784	0.866534	1.12117	1.12117
C12orf75	39586	0.881073	0.985915	1.02057	1.02057	0.746385	0.95969	0.956265	-1.04574	1.19075e-08	3.29115e-07	0.33123	-3.01905
C12orf76	3648	0.847248	0.975666	1.11361	1.11361	0.680082	0.931418	1.25125	1.25125	0.313855	0.575486	1.67559	1.67559
C12orf77	22	0.00298889	0.0256842	149.889	149.889	0.00189643	0.0198798	417.927	417.927	0.00175408	0.0134568	301.486	301.486
C12orf79	77	0.739948	0.935741	1.07885	1.07885	0.00829497	0.0649667	0.21991	-4.54732	0.0110451	0.0586339	0.243347	-4.10936
C14orf1	27040	0.424266	0.756716	1.1705	1.1705	0.124115	0.434992	1.34173	1.34173	0.099292	0.289505	1.36859	1.36859
C14orf119	26067.5	0.457173	0.778392	1.14882	1.14882	0.702066	0.941677	1.07512	1.07512	0.480965	0.725028	1.14068	1.14068
C14orf132	55851.7	0.180343	0.496445	1.51388	1.51388	0.0306899	0.175149	1.94135	1.94135	7.67695e-05	0.000941125	3.58702	3.58702
C14orf142	12029	0.569932	0.845799	0.860574	-1.16202	0.328876	0.714544	0.766255	-1.30505	0.418082	0.672266	0.804201	-1.24347
C14orf159	23836.1	0.130799	0.410406	1.29541	1.29541	0.615772	0.900811	1.09328	1.09328	0.0767383	0.24288	1.35082	1.35082
C14orf166	86467	0.00243833	0.0217496	0.737895	-1.35521	0.0115562	0.0837921	0.779297	-1.28321	0.000503638	0.00474065	0.701883	-1.42474
C14orf169	25730	0.575554	0.849301	1.11001	1.11001	0.953542	1	1.01121	1.01121	0.945774	0.982188	1.01306	1.01306
C14orf178	88	0.134853	0.418147	1.54339	1.54339	0.63215	0.908848	0.894494	-1.11795	0.067296	0.222059	1.76606	1.76606
C14orf182	38.428	0.146064	0.439721	2.55098	2.55098	0.363157	0.745747	0.71652	-1.39563	0.162276	0.40013	2.21938	2.21938
C14orf183	41	0.521699	0.817787	1.32271	1.32271	0.418409	0.787833	0.656724	-1.52271	0.617253	0.819578	0.740413	-1.3506
C14orf2	52018.9	0.518865	0.815546	1.09044	1.09044	0.957175	1	0.992647	-1.00741	0.328358	0.589585	1.13865	1.13865
C14orf23	54	0.555668	0.838082	1.55932	1.55932	0.192712	0.560135	2.8519	2.8519	0.478434	0.722439	2.41883	2.41883
C14orf28	1735	0.297937	0.643136	0.668016	-1.49697	0.993387	1	0.993483	-1.00656	0.639662	0.832477	0.831447	-1.20272
C14orf37	7424	0.293536	0.638123	0.67872	-1.47336	0.499299	0.842192	0.787836	-1.2693	0.856022	0.945271	1.06111	1.06111
C14orf39	244	3.15983e-05	0.000558851	0.265392	-3.76801	0.00816672	0.0641602	0.455731	-2.19428	0.000843185	0.00727768	0.361643	-2.76515
C14orf79	3176	0.0266823	0.140804	1.22509	1.22509	0.00209927	0.0216018	1.32587	1.32587	1.37477e-12	6.69934e-11	1.90569	1.90569
C14orf80	11894	0.668993	0.900493	1.12374	1.12374	0.62032	0.902971	1.14418	1.14418	0.969348	0.989591	1.01119	1.01119
C14orf93	4736	0.146124	0.439834	0.717167	-1.39438	0.580223	0.886782	0.886146	-1.12848	0.253892	0.514391	0.777515	-1.28615
C15orf26	60	0.21044	0.541366	1.84265	1.84265	0.898297	1	0.701623	-1.42527	0.258168	0.518646	1.79244	1.79244
C15orf27	6517.96	0.000698026	0.00775731	4.09515	4.09515	0.385139	0.765538	1.51189	1.51189	0.000245317	0.00253905	4.52778	4.52778
C15orf37	4200.82	0.567511	0.843978	0.830062	-1.20473	0.583453	0.888018	0.834695	-1.19804	0.532458	0.76297	0.815746	-1.22587
C15orf38-AP3S2	699.237	0.908931	0.992927	1.27553	1.27553	0.825944	0.987034	0.590854	-1.69246	0.192936	0.443908	12.3075	12.3075
C15orf39	77326	0.994334	1	0.999269	-1.00073	0.0279022	0.163245	0.785402	-1.27323	0.0467313	0.171007	0.804925	-1.24235
C15orf40	16284.6	0.457615	0.778679	1.19038	1.19038	0.966306	1	1.01031	1.01031	0.548212	0.773029	1.15265	1.15265
C15orf41	11184	0.317531	0.662296	0.749899	-1.33351	0.554179	0.872058	1.16582	1.16582	0.416264	0.671029	1.23166	1.23166
C15orf48	411	1.23846e-05	0.000247959	3.26242	3.26242	5.87958e-05	0.00111872	2.69327	2.69327	5.18312e-06	8.62781e-05	3.60301	3.60301
C15orf52	880	0.00131148	0.0131289	0.419885	-2.3816	0.0131426	0.0927819	1.88756	1.88756	0.0710608	0.230358	0.635056	-1.57466
C15orf56	18	0.17897	0.494592	0.266	-3.75939	0.681568	0.931626	1.76363	1.76363	0.921718	0.972566	0.989116	-1.011
C15orf57	9511.68	7.02998e-05	0.00110695	1.36979	1.36979	3.18128e-05	0.000667011	1.38626	1.38626	2.06399e-09	6.50522e-08	1.59681	1.59681
C15orf59	6375	0.016375	0.0982448	2.67214	2.67214	0.550692	0.870864	1.31495	1.31495	0.000262892	0.00269809	4.17438	4.17438
C15orf61	16545.7	0.0136958	0.0860822	1.5287	1.5287	0.824031	0.986161	1.04205	1.04205	0.0549246	0.192794	1.3987	1.3987
C15orf62	2649	0.780675	0.951842	0.975771	-1.02483	0.410676	0.78501	0.927223	-1.07849	0.548371	0.773196	0.951389	-1.05109
C15orf65	288	0.000112609	0.00164707	3.51205	3.51205	0.120969	0.427771	1.48755	1.48755	6.541e-06	0.000106871	5.38563	5.38563
C16orf13	22062.1	0.318593	0.663148	0.851837	-1.17393	0.400005	0.776738	0.874239	-1.14385	0.0668512	0.22121	0.737502	-1.35593
C16orf3	319	0.813179	0.963814	0.932284	-1.07263	0.486952	0.835428	1.12852	1.12852	0.0905047	0.272043	1.38233	1.38233
C16orf45	4876.93	0.494672	0.802778	0.56097	-1.78263	0.936683	1	1.05886	1.05886	0.0010099	0.00846971	6.78796	6.78796
C16orf46	1270	0.00462335	0.0365177	1.30713	1.30713	0.581864	0.887327	0.950296	-1.0523	0.00118452	0.00963238	1.37558	1.37558
C16orf52	12578	0.829906	0.969116	1.05707	1.05707	0.538829	0.864755	0.845307	-1.183	0.941622	0.980857	1.01976	1.01976
C16orf54	18	0.894571	0.990679	1.61923	1.61923	0.56067	0.876967	1.04021	1.04021	0.702529	0.869872	3.94445	3.94445
C16orf58	39668.2	0.968014	1	1.00515	1.00515	0.929015	1	1.01168	1.01168	0.50754	0.744694	1.08732	1.08732
C16orf59	17192	0.636753	0.88203	0.902441	-1.10811	0.125498	0.437995	0.699435	-1.42973	0.305955	0.568638	0.794267	-1.25902
C16orf62	36863.1	0.74799	0.939537	0.974912	-1.02573	0.00184991	0.0195189	1.26058	1.26058	0.00944257	0.0518744	1.21441	1.21441
C16orf70	18041.5	0.864267	0.981205	1.03818	1.03818	0.719371	0.948531	0.922299	-1.08425	0.889394	0.958032	0.969537	-1.03142
C16orf71	442.038	0.250725	0.591289	0.85137	-1.17458	0.598996	0.895371	0.945172	-1.05801	0.533114	0.763137	1.08935	1.08935
C16orf72	40851	0.012793	0.081856	1.0573	1.0573	9.96417e-11	6.20095e-09	1.15785	1.15785	4.15975e-05	0.000549599	1.09655	1.09655
C16orf74	3422	0.810422	0.963326	1.09722	1.09722	0.546109	0.868363	0.777212	-1.28665	0.595339	0.805477	0.808131	-1.23742
C16orf86	3141	0.617314	0.871096	1.3345	1.3345	0.449308	0.811753	1.52914	1.52914	0.522754	0.756509	1.43879	1.43879
C16orf87	13787	0.953498	1	0.989207	-1.01091	0.330726	0.715619	0.823532	-1.21428	0.584674	0.798289	1.10899	1.10899
C16orf89	81	0.461576	0.781006	1.65449	1.65449	0.578709	0.886296	0.909022	-1.10008	0.380362	0.641078	1.81154	1.81154
C16orf90	26	0.106259	0.362439	5.78926	5.78926	0.0842931	0.34329	7.95333	7.95333	0.0681934	0.224112	10.7283	10.7283
C16orf91	9221	0.452719	0.774995	1.23602	1.23602	0.92237	1	1.02863	1.02863	0.847928	0.94113	1.05688	1.05688
C16orf93	739.096	0.00425345	0.0341061	0.665504	-1.50262	0.0231114	0.143054	0.725169	-1.37899	0.000537746	0.00501061	0.608501	-1.64338
C16orf95	3033	0.0537019	0.231398	1.28866	1.28866	0.960179	1	1.00452	1.00452	0.00135059	0.0107618	1.52917	1.52917
C16orf96	240	0.221291	0.556604	1.14647	1.14647	0.0207884	0.132004	1.42988	1.42988	0.00182204	0.0138593	2.00992	2.00992
C17orf100	1821	0.748052	0.939537	0.793108	-1.26086	0.819791	0.984703	1.16394	1.16394	0.523879	0.757519	1.5039	1.5039
C17orf102	221	1	1	1	-1	1	1	1	-1	0.0171359	0.082253	7328.59	7328.59
C17orf104	23177	0.133706	0.415909	0.733146	-1.36398	0.259208	0.640903	1.22713	1.22713	0.0907751	0.272646	0.701462	-1.42559
C17orf105	26	0.146222	0.439926	3.89786	3.89786	0.0822022	0.338456	9.26207	9.26207	0.0936005	0.278436	7.92327	7.92327
C17orf107	624.297	0.00707807	0.0515322	1.44401	1.44401	0.390634	0.770903	0.913384	-1.09483	0.582018	0.796723	1.06541	1.06541
C17orf47	20.3136	0.432787	0.761009	1.56533	1.56533	0.107147	0.399774	2.88245	2.88245	0.0452909	0.167302	3.8198	3.8198
C17orf49	17528.9	0.0040794	0.0328995	1.31665	1.31665	6.6058e-08	2.65605e-06	1.65668	1.65668	1.36122e-08	3.72544e-07	1.69605	1.69605
C17orf50	69	0.0658087	0.265696	2.44839	2.44839	0.166019	0.516861	1.73769	1.73769	0.0566963	0.197352	2.58605	2.58605
C17orf51	34926	0.916512	0.995163	1.01625	1.01625	0.0190463	0.123787	0.667358	-1.49845	0.694395	0.865071	0.940257	-1.06354
C17orf53	10007	0.731707	0.932037	0.906964	-1.10258	0.835886	0.988874	1.05864	1.05864	0.445856	0.695896	0.799486	-1.2508
C17orf58	23117	0.00879246	0.060761	1.26363	1.26363	0.302421	0.689411	1.09865	1.09865	0.00141077	0.0111656	1.3292	1.3292
C17orf59	8425	0.0167745	0.099875	1.21121	1.21121	0.00255688	0.0254918	1.27215	1.27215	2.27653e-07	5.0552e-06	1.50583	1.50583
C17orf62	35447.1	0.645174	0.887686	0.93581	-1.06859	0.617163	0.901277	1.0722	1.0722	0.352021	0.614103	0.872891	-1.14562
C17orf64	72	0.123783	0.397524	2.74976	2.74976	0.667007	0.926082	1.63071	1.63071	0.499699	0.738685	1.6148	1.6148
C17orf67	2034	0.885017	0.987332	1.01352	1.01352	0.373516	0.755264	0.910561	-1.09822	0.281139	0.544312	0.898487	-1.11298
C17orf70	31474.1	0.143446	0.434922	1.18639	1.18639	0.877605	0.996484	1.01833	1.01833	0.519402	0.754339	1.08001	1.08001
C17orf74	70	0.748555	0.93962	0.954364	-1.04782	0.180324	0.540448	0.718704	-1.39139	0.892624	0.959245	1.02791	1.02791
C17orf75	29419.5	0.640534	0.884759	0.987793	-1.01236	6.35965e-06	0.000160768	0.884871	-1.13011	0.876835	0.953384	0.995968	-1.00405
C17orf78	166	0.911678	0.994122	1.08018	1.08018	0.668139	0.926263	0.834422	-1.19843	0.82218	0.929166	0.998763	-1.00124
C17orf80	31832.1	0.672049	0.902071	0.931353	-1.07371	0.503996	0.844038	0.892743	-1.12014	0.75451	0.896478	0.94907	-1.05366
C17orf82	157	0.842255	0.974759	1.09729	1.09729	0.0186695	0.121973	2.31752	2.31752	0.430118	0.683367	1.3707	1.3707
C17orf85	63044	0.988464	1	1.00174	1.00174	0.522188	0.854956	0.924462	-1.08171	0.718544	0.878941	1.04382	1.04382
C17orf89	18072	0.517488	0.815203	1.15219	1.15219	0.783648	0.973074	0.938748	-1.06525	0.865259	0.948413	0.961913	-1.0396
C17orf96	41896	0.585488	0.853866	1.07945	1.07945	0.129914	0.447575	0.794651	-1.25841	0.334601	0.596899	0.866747	-1.15374
C17orf97	11762	0.703077	0.917733	1.10818	1.10818	0.863627	0.995261	0.953376	-1.0489	0.753553	0.896237	1.08885	1.08885
C18orf21	10954	0.864644	0.981205	1.04646	1.04646	0.659787	0.922081	0.885087	-1.12983	0.855384	0.944941	1.04979	1.04979
C18orf25	39553	0.376031	0.718774	1.03757	1.03757	0.0225262	0.140149	1.09979	1.09979	0.793214	0.915104	1.01126	1.01126
C18orf32	4032.37	0.954825	1	1.03095	1.03095	0.608212	0.897597	1.29814	1.29814	0.300062	0.563799	1.65247	1.65247
C18orf42	22	0.501019	0.807202	0.0234409	-42.6604	0.501019	0.842971	0.0234409	-42.6604	0.664769	0.846387	16.3186	16.3186
C18orf54	29372.1	0.177336	0.492093	1.26872	1.26872	0.264479	0.647363	1.21951	1.21951	0.422052	0.675733	1.15547	1.15547
C18orf61	27.0046	0.626718	0.875922	0.56889	-1.75781	0.225253	0.603299	0.306862	-3.25879	0.781067	0.909084	0.880643	-1.13553
C18orf8	18789.8	0.616525	0.870631	1.11723	1.11723	0.845323	0.991504	1.04478	1.04478	0.552026	0.775618	1.13993	1.13993
C19orf10	40265	0.0748283	0.288976	1.31263	1.31263	0.766782	0.967314	1.04884	1.04884	0.12946	0.345503	1.26299	1.26299
C19orf12	23360.1	0.160381	0.465469	1.32587	1.32587	0.342232	0.725817	1.21477	1.21477	0.391571	0.649715	1.19275	1.19275
C19orf18	10	0.934538	0.999715	0.606897	-1.64773	0.895387	1	0.449808	-2.22317	0.372436	0.633862	2.7903	2.7903
C19orf24	21818	0.0427173	0.198302	1.53658	1.53658	0.260021	0.642199	1.28137	1.28137	0.174011	0.417221	1.34466	1.34466
C19orf25	25007	0.177072	0.492068	1.29366	1.29366	0.965744	1	0.99131	-1.00877	0.40626	0.662222	1.17564	1.17564
C19orf26	7217	0.751471	0.939982	1.06251	1.06251	0.916109	1	1.02015	1.02015	0.251524	0.511504	1.24584	1.24584
C19orf35	69	0.269882	0.612836	1.5756	1.5756	0.684011	0.932851	1.17043	1.17043	0.393423	0.651019	0.760878	-1.31427
C19orf38	98	0.296975	0.641889	0.628779	-1.59038	0.901066	1	0.884397	-1.13071	0.433107	0.685235	1.77297	1.77297
C19orf40	6103.02	0.444305	0.768197	1.24465	1.24465	0.77427	0.969639	1.08742	1.08742	0.50306	0.74135	1.21278	1.21278
C19orf43	115377	0.521996	0.817956	1.05907	1.05907	0.936573	1	1.00724	1.00724	0.378728	0.639372	1.08164	1.08164
C19orf44	9019.55	0.160496	0.465596	1.10939	1.10939	0.763707	0.966244	1.02306	1.02306	0.231061	0.487149	1.09203	1.09203
C19orf45	380	0.788802	0.95485	0.945303	-1.05786	0.40364	0.779322	1.38583	1.38583	0.971717	0.990052	1.01468	1.01468
C19orf47	13531.8	0.821177	0.966431	1.05689	1.05689	0.653567	0.919376	0.892326	-1.12067	0.837734	0.936883	0.950118	-1.0525
C19orf48	88473.7	0.265876	0.608941	1.11271	1.11271	0.0308196	0.175582	0.797879	-1.25332	0.11115	0.313419	0.848939	-1.17794
C19orf52	11617	0.764971	0.944541	1.03126	1.03126	0.4871	0.835609	0.928351	-1.07718	0.485021	0.727559	0.930066	-1.07519
C19orf53	35882	0.285153	0.630415	1.18828	1.18828	0.68574	0.934045	1.06922	1.06922	0.365653	0.627015	1.15818	1.15818
C19orf54	31745	0.717926	0.926006	1.05939	1.05939	0.0565022	0.266758	0.712754	-1.40301	0.527558	0.760246	0.900214	-1.11085
C19orf57	1740	4.54633e-05	0.000758019	0.48945	-2.04311	3.4054e-05	0.000704926	0.466706	-2.14267	0.0411438	0.156358	0.878663	-1.13809
C19orf60	10311	0.00255108	0.0225619	1.09839	1.09839	6.52665e-07	2.12208e-05	1.20824	1.20824	2.05363e-05	0.00029704	1.16046	1.16046
C19orf66	8242.97	0.347062	0.691761	1.43813	1.43813	0.0701135	0.30753	1.93847	1.93847	0.0786021	0.24682	1.90553	1.90553
C19orf67	27	0.650736	0.889907	0.773052	-1.29357	0.78281	0.972524	1.32052	1.32052	0.719939	0.879697	0.703898	-1.42066
C19orf68	8668	0.6176	0.871267	0.857321	-1.16642	0.911352	1	0.966893	-1.03424	0.942414	0.980928	1.02195	1.02195
C19orf70	10109.1	0.0765621	0.293353	1.07745	1.07745	0.00601942	0.0505264	1.12414	1.12414	0.242107	0.500743	1.05022	1.05022
C19orf71	1253	0.858344	0.979253	0.967762	-1.03331	0.880074	0.997068	0.97351	-1.02721	0.363565	0.625169	0.856085	-1.16811
C19orf73	877	0.647516	0.888561	1.19121	1.19121	0.107049	0.39975	1.82811	1.82811	0.350373	0.612675	1.42648	1.42648
C19orf80	64	0.567432	0.843978	0.580596	-1.72237	0.385673	0.766366	2.09461	2.09461	0.799602	0.918525	1.5851	1.5851
C19orf81	196	0.152248	0.450907	1.56616	1.56616	0.102767	0.389862	1.6665	1.6665	0.00568076	0.0347878	2.39423	2.39423
C19orf83	602.886	0.299658	0.644414	1.45818	1.45818	0.0683644	0.302304	2.00221	2.00221	0.34229	0.604515	1.43727	1.43727
C19orf84	45	0.892747	0.990229	0.985488	-1.01473	0.73833	0.956442	1.26946	1.26946	0.214116	0.471761	2.09358	2.09358
C1D	9671.98	0.871154	0.983607	1.05057	1.05057	0.789006	0.975085	0.919279	-1.08781	0.963913	0.988223	0.986297	-1.01389
C1GALT1	19164	0.203653	0.531107	1.32418	1.32418	0.190347	0.556638	1.33462	1.33462	0.224009	0.484168	1.30907	1.30907
C1GALT1C1	24242.7	0.329049	0.674423	1.20626	1.20626	0.648113	0.917006	1.09369	1.09369	0.524759	0.758146	1.1319	1.1319
C1QB	36	0.665725	0.898552	31.4857	31.4857	0.568265	0.880535	0.0196434	-50.9077	0.971728	0.990052	1.32014	1.32014
C1QBP	233997	0.00024968	0.00327449	1.25035	1.25035	0.367256	0.749296	0.942852	-1.06061	0.724696	0.881714	1.02277	1.02277
C1QL1	9596	0.657639	0.893977	1.15759	1.15759	0.552513	0.871619	1.2141	1.2141	0.202752	0.45748	1.48932	1.48932
C1QL2	148	0.560032	0.840069	0.0196434	-50.9077	0.560032	0.876931	0.0196434	-50.9077	0.563553	0.783932	95.6064	95.6064
C1QL3	2208	0.757635	0.942778	0.770279	-1.29823	0.912245	1	1.08892	1.08892	0.152762	0.384977	2.56424	2.56424
C1QL4	17508	0.811776	0.963326	1.06328	1.06328	0.0172653	0.114677	1.73797	1.73797	0.21188	0.468471	1.35573	1.35573
C1QTNF1	1322	0.310407	0.655606	0.401123	-2.493	0.482491	0.832762	0.563887	-1.7734	0.803245	0.920653	1.18188	1.18188
C1QTNF2	76	0.610886	0.868285	0.788103	-1.26887	0.403142	0.778823	0.694795	-1.43927	0.125294	0.338733	2.41445	2.41445
C1QTNF3	1218.96	0.499176	0.805682	0.836217	-1.19586	0.753094	0.962913	1.09479	1.09479	0.473029	0.718265	1.22567	1.22567
C1QTNF3-AMACR	781.127	0.559287	0.839445	0.481605	-2.07639	0.715542	0.947318	0.661758	-1.51113	0.894781	0.960228	1.13834	1.13834
C1QTNF4	968	0.0797999	0.301261	488.046	488.046	0.0882429	0.352268	244.002	244.002	0.0332294	0.134383	31526.7	31526.7
C1QTNF5	129.969	0.473224	0.789042	3.51328	3.51328	0.717818	0.947897	0.665663	-1.50226	0.648274	0.83766	39.1606	39.1606
C1QTNF6	2413	3.5326e-10	1.63968e-08	1.91877	1.91877	0.426201	0.79439	1.08572	1.08572	1.16218e-16	9.08409e-15	2.38606	2.38606
C1QTNF7	34	0.384237	0.725097	1.82208	1.82208	0.80006	0.97852	0.862778	-1.15905	0.537271	0.766001	0.852886	-1.17249
C1QTNF8	16	0.90066	0.991551	1.92668	1.92668	0.375003	0.756237	2.40634	2.40634	0.215558	0.473994	7.68975	7.68975
C1QTNF9	76.4819	0.00560279	0.0425346	7.01521	7.01521	0.705287	0.94267	0.762174	-1.31204	0.0315308	0.129548	3.06135	3.06135
C1QTNF9B	2088.26	6.34521e-11	3.20392e-09	31.3015	31.3015	0.570157	0.881304	1.47559	1.47559	6.87083e-06	0.0001117	11.0414	11.0414
C1QTNF9B-AS1	2890.25	0.00236304	0.0212499	7.03664	7.03664	0.948194	1	0.94234	-1.06119	0.0134034	0.0683673	5.02467	5.02467
C1R	10976.8	8.69536e-06	0.000182313	0.215611	-4.63799	0.00682136	0.0555633	0.507562	-1.9702	0.000108859	0.00127684	0.318408	-3.14062
C1RL	12432.8	0.721266	0.927762	0.90343	-1.10689	0.325612	0.712092	1.29271	1.29271	0.867276	0.949418	0.954193	-1.04801
C1RL-AS1	3731.33	0.184942	0.503877	0.47622	-2.09987	0.886269	0.999129	1.06545	1.06545	0.51746	0.752638	0.728148	-1.37335
C1S	839	2.5305e-05	0.000466935	1.77568	1.77568	0.564905	0.879267	0.921695	-1.08496	5.2912e-09	1.57615e-07	2.38192	2.38192
C1orf101	107	0.11712	0.384322	0.627605	-1.59336	0.00850178	0.0662413	0.324182	-3.08468	0.387578	0.646825	0.822549	-1.21573
C1orf105	10	0.409753	0.745544	51.1741	51.1741	0.35438	0.736931	96.2898	96.2898	0.0935371	0.278372	292.159	292.159
C1orf106	11	0.489158	0.798416	1.18257	1.18257	0.4538	0.814273	1.4528	1.4528	0.935667	0.97827	1.58218	1.58218
C1orf109	24442	0.512222	0.81403	1.13109	1.13109	0.509639	0.847058	0.876285	-1.14118	0.887788	0.957488	0.972867	-1.02789
C1orf111	52	0.869185	0.982637	1.02521	1.02521	0.502094	0.843444	1.33352	1.33352	0.623711	0.822217	1.24902	1.24902
C1orf112	20938	0.00144025	0.0141426	0.805375	-1.24166	5.18304e-06	0.000133971	0.729823	-1.3702	3.07383e-05	0.000419453	0.750714	-1.33207
C1orf115	20184	0.198235	0.523196	1.32062	1.32062	0.288801	0.674989	1.26064	1.26064	0.633638	0.828057	1.11304	1.11304
C1orf122	21363	0.444144	0.768173	1.17339	1.17339	0.816969	0.983354	0.950354	-1.05224	0.340528	0.602578	1.21831	1.21831
C1orf123	12173.3	0.216488	0.549427	1.12692	1.12692	0.898516	1	1.0119	1.0119	0.0230343	0.102602	1.23808	1.23808
C1orf127	36	0.190493	0.511355	2.91227	2.91227	0.0558718	0.264676	17.3581	17.3581	0.0914233	0.27413	8.80704	8.80704
C1orf131	16007.9	0.619599	0.872242	1.12283	1.12283	0.61849	0.901934	0.88391	-1.13134	0.988491	0.996497	0.996529	-1.00348
C1orf145	290.381	0.782373	0.952783	0.890736	-1.12267	0.145536	0.479096	2.04768	2.04768	0.234728	0.490883	1.8468	1.8468
C1orf146	23	0.487303	0.796986	0.594813	-1.6812	0.335314	0.719352	1.61185	1.61185	0.314819	0.576202	2.05149	2.05149
C1orf159	12197	0.0115659	0.0753617	1.2653	1.2653	0.808009	0.980477	1.02324	1.02324	0.818603	0.928076	1.02234	1.02234
C1orf162	419	0.665509	0.898425	1.08346	1.08346	0.30801	0.693458	1.24057	1.24057	0.564943	0.784895	1.13594	1.13594
C1orf167	75.8374	0.590084	0.857566	2.01652	2.01652	0.103871	0.392297	3.32579	3.32579	0.213029	0.470374	2.6154	2.6154
C1orf168	97	0.475018	0.790592	3.21936	3.21936	0.0536424	0.257993	0.157481	-6.34996	0.379507	0.640327	4.33793	4.33793
C1orf174	20056	0.350311	0.695199	1.09314	1.09314	0.153615	0.49402	0.869322	-1.15032	0.799161	0.918502	1.02415	1.02415
C1orf186	38	0.029204	0.151092	1319.78	1319.78	0.244463	0.624615	148.713	148.713	0.057842	0.200252	256.495	256.495
C1orf189	46	0.745537	0.937668	1.17909	1.17909	0.317981	0.703871	1.64898	1.64898	0.666156	0.846877	1.33176	1.33176
C1orf192	2213	0.857934	0.979086	0.950919	-1.05161	0.507622	0.846177	0.827032	-1.20914	0.805651	0.921736	1.05929	1.05929
C1orf194	38	0.432192	0.760727	1.79687	1.79687	0.762192	0.966032	0.636756	-1.57046	0.25334	0.513858	4.25838	4.25838
C1orf198	42762.5	0.51618	0.814771	1.05957	1.05957	0.979209	1	1.00245	1.00245	0.626473	0.823418	1.04513	1.04513
C1orf204	89.0495	0.179201	0.494879	0.289436	-3.455	0.601119	0.895637	1.31328	1.31328	0.0625241	0.21154	4.15296	4.15296
C1orf21	25005	0.00096328	0.0101748	0.521188	-1.91869	0.0379515	0.204495	0.686389	-1.4569	0.0850194	0.26028	0.73639	-1.35798
C1orf213	5571.45	0.881242	0.985936	0.938057	-1.06603	0.346758	0.730768	1.43971	1.43971	0.969486	0.989591	1.01625	1.01625
C1orf216	27464	0.579399	0.851278	1.10957	1.10957	0.775315	0.969639	1.05569	1.05569	0.339928	0.601787	1.1925	1.1925
C1orf220	3087	0.881363	0.986014	0.954402	-1.04778	0.999354	1	0.998948	-1.00105	0.921344	0.972448	1.03382	1.03382
C1orf226	4246	0.366629	0.711332	0.648033	-1.54313	0.921655	1	1.04358	1.04358	0.83874	0.937269	0.915056	-1.09283
C1orf228	251	0.398	0.73621	1.48663	1.48663	0.150695	0.489159	1.99744	1.99744	0.000387727	0.00377696	5.33749	5.33749
C1orf229	108	0.731063	0.931709	0.79988	-1.25019	0.960642	1	0.965645	-1.03558	0.264572	0.526584	2.56027	2.56027
C1orf233	3383	0.909901	0.993484	0.928515	-1.07699	0.31145	0.696463	1.79871	1.79871	0.0665019	0.220369	2.72056	2.72056
C1orf234	29	0.407524	0.744314	0.640433	-1.56144	0.501127	0.842971	1.49548	1.49548	0.197932	0.451008	2.24932	2.24932
C1orf27	18359.1	0.337686	0.683267	1.18016	1.18016	0.760811	0.965889	0.946315	-1.05673	0.571292	0.789116	1.10425	1.10425
C1orf35	17491	0.954129	1	0.993265	-1.00678	0.351625	0.734799	0.904803	-1.10521	0.325667	0.586875	0.900495	-1.1105
C1orf43	137643	0.874214	0.983934	0.987169	-1.013	0.77857	0.971098	0.977264	-1.02327	0.794826	0.915905	0.978964	-1.02149
C1orf50	5911.98	0.764961	0.944541	1.02092	1.02092	0.0179481	0.118168	1.16927	1.16927	0.0957944	0.282852	1.11595	1.11595
C1orf52	21390.9	0.946498	1	1.01414	1.01414	0.823057	0.985512	1.0475	1.0475	0.955521	0.985922	0.988342	-1.0118
C1orf53	1605	0.0338501	0.168298	1.6005	1.6005	0.25826	0.640069	0.779753	-1.28246	0.257156	0.517929	1.28835	1.28835
C1orf54	39	0.218999	0.553157	2.78284	2.78284	0.155669	0.497622	3.53464	3.53464	0.099616	0.290233	5.56654	5.56654
C1orf56	4730.59	0.624606	0.874878	1.08635	1.08635	0.165024	0.515171	1.25783	1.25783	0.157279	0.392004	1.27048	1.27048
C1orf61	1017	0.0529611	0.229471	2.81474	2.81474	0.549139	0.870523	0.698109	-1.43244	0.080744	0.251245	2.50804	2.50804
C1orf74	2816	0.0490027	0.217776	1.21265	1.21265	0.287338	0.673409	0.894631	-1.11778	0.539606	0.767713	1.05848	1.05848
C1orf85	499	0.872291	0.98363	1.33094	1.33094	0.746153	0.959627	1.76628	1.76628	0.346881	0.609514	4.283	4.283
C1orf86	30416	0.900407	0.991551	1.02034	1.02034	0.865799	0.995571	0.972945	-1.02781	0.834645	0.935248	0.966857	-1.03428
C1orf95	2664	0.654276	0.892033	0.697219	-1.43427	0.983384	1	0.985132	-1.01509	0.0598265	0.205064	3.06594	3.06594
C2	388.45	0.00142996	0.0140628	1.99484	1.99484	0.000420879	0.00577962	2.26354	2.26354	5.32023e-05	0.000685317	2.86785	2.86785
C20orf144	93	0.0953983	0.339065	1.85195	1.85195	0.690652	0.937029	1.12935	1.12935	0.129658	0.345852	1.69778	1.69778
C20orf166	18	0.119147	0.388888	7.744	7.744	0.278666	0.662646	0.0196434	-50.9077	0.168991	0.410217	7.74006	7.74006
C20orf166-AS1	252	3.44658e-05	0.000602951	9.27646	9.27646	0.333051	0.717193	0.635093	-1.57457	5.26541e-06	8.75672e-05	13.984	13.984
C20orf173	16	0.471251	0.788013	1.87643	1.87643	0.797726	0.97852	1.81781	1.81781	0.829692	0.932962	0.589245	-1.69709
C20orf194	15001	0.973756	1	0.990227	-1.00987	0.128687	0.444996	1.51071	1.51071	0.0071924	0.0420736	2.00035	2.00035
C20orf195	190	0.343205	0.687853	0.745533	-1.34132	0.00440638	0.0394435	2.8588	2.8588	0.861535	0.946811	1.08835	1.08835
C20orf196	1218	0.337736	0.683267	0.814772	-1.22734	0.81448	0.982786	0.94302	-1.06042	0.511174	0.747445	1.14813	1.14813
C20orf202	32	0.236082	0.576228	2.20157	2.20157	0.170788	0.524083	2.60756	2.60756	0.0821338	0.254072	3.97237	3.97237
C20orf203	68	0.927905	0.997954	0.606897	-1.64773	0.298325	0.684865	3.58588	3.58588	0.171096	0.413267	23.2045	23.2045
C20orf24	51815.7	0.197576	0.522299	1.18326	1.18326	0.338897	0.722653	0.874035	-1.14412	0.505411	0.743344	1.09266	1.09266
C20orf26	101	0.268473	0.61184	1.81707	1.81707	0.388916	0.769444	1.60907	1.60907	0.0120402	0.0628077	7.49245	7.49245
C20orf27	52400.1	0.0384334	0.184696	1.30064	1.30064	0.274161	0.657752	0.857592	-1.16606	0.904531	0.964776	1.01626	1.01626
C20orf96	6900	0.693937	0.912829	1.16082	1.16082	0.33691	0.720634	1.41691	1.41691	0.375415	0.636434	1.38255	1.38255
C21orf119	2534	0.996073	1	1.00206	1.00206	0.764022	0.966453	1.12052	1.12052	0.705884	0.871818	1.16348	1.16348
C21orf140	368	0.717488	0.925976	0.885897	-1.1288	0.529594	0.859178	0.832006	-1.20191	0.417411	0.671792	1.14941	1.14941
C21orf15	1646.35	0.0019141	0.0179393	13.9611	13.9611	0.315254	0.700441	2.51478	2.51478	0.000824721	0.00716261	16.6835	16.6835
C21orf2	6661	0.734361	0.934065	1.12822	1.12822	0.377579	0.758265	0.700662	-1.42722	0.729035	0.883595	1.13131	1.13131
C21orf33	77657.6	0.00780905	0.0555099	1.33085	1.33085	0.957427	1	0.993879	-1.00616	0.220034	0.479595	1.14597	1.14597
C21orf49	163	0.025791	0.137213	0.703559	-1.42135	0.392182	0.771718	0.905412	-1.10447	0.199456	0.452679	0.856257	-1.16787
C21orf58	35322	0.0585191	0.246078	0.739828	-1.35167	0.365927	0.748556	0.871427	-1.14754	0.0428081	0.160744	0.722661	-1.38377
C21orf59	38134.6	0.865234	0.981456	1.02764	1.02764	0.288411	0.674725	1.17946	1.17946	0.665141	0.846551	1.07126	1.07126
C21orf62	104.003	0.949115	1	1.23959	1.23959	0.7562	0.964712	1.23866	1.23866	0.259043	0.519976	2.65862	2.65862
C21orf67	1541	0.150401	0.447608	0.865384	-1.15556	0.00347598	0.0327345	0.748064	-1.33678	0.440733	0.691867	1.08111	1.08111
C21orf90	67	0.582063	0.852279	0.572273	-1.74742	0.403883	0.779343	0.407686	-2.45287	0.535185	0.764659	1.17174	1.17174
C21orf91	23853.1	0.0215423	0.120377	0.643879	-1.55309	0.024295	0.148406	0.650425	-1.53746	0.0361631	0.142329	0.673032	-1.48581
C22orf15	117	0.0690603	0.274681	0.713356	-1.40182	0.0896699	0.355929	0.732795	-1.36464	0.992555	0.997681	1.00217	1.00217
C22orf23	3525	0.00442216	0.0351274	1.16534	1.16534	0.0107429	0.0793375	1.14632	1.14632	1.43524e-06	2.70714e-05	1.36555	1.36555
C22orf24	148	0.00741696	0.0534027	0.373894	-2.67456	0.109223	0.404536	0.660828	-1.51325	0.222499	0.482397	0.759742	-1.31624
C22orf29	26774	0.461906	0.781328	0.874507	-1.1435	0.27613	0.65948	0.817029	-1.22395	0.664495	0.846263	0.925078	-1.08099
C22orf31	15	0.808169	0.962878	0.244499	-4.09	0.419012	0.788209	1.2682	1.2682	0.57029	0.788351	0.592847	-1.68677
C22orf34	10347	0.0831606	0.309002	1.73549	1.73549	0.362086	0.745005	1.35583	1.35583	0.0902388	0.271453	1.71644	1.71644
C22orf39	24284	0.734647	0.934129	0.938722	-1.06528	0.976091	1	0.994479	-1.00555	0.81045	0.924302	0.956234	-1.04577
C22orf42	40	1	1	1	-1	1	1	1	-1	0.2302	0.486331	1325.11	1325.11
C22orf46	24771	0.533888	0.825177	0.889025	-1.12483	0.62899	0.907004	0.913214	-1.09503	0.922497	0.972748	1.01809	1.01809
C2CD2	28330.7	0.0752047	0.289571	0.73502	-1.36051	0.144089	0.475535	0.77995	-1.28213	0.0137676	0.0697338	0.641679	-1.55841
C2CD2L	12529	0.785849	0.954339	1.05231	1.05231	0.478318	0.829956	1.13963	1.13963	0.306828	0.569667	1.20663	1.20663
C2CD3	32226.9	0.878696	0.985571	1.02249	1.02249	0.840451	0.990012	0.9711	-1.02976	0.747789	0.892379	1.04779	1.04779
C2CD4A	1502.28	0.13101	0.41086	4.27517	4.27517	0.120481	0.426738	4.45402	4.45402	0.593989	0.804847	1.77692	1.77692
C2CD4B	23.722	0.358626	0.703747	2.94942	2.94942	0.986125	1	0.895641	-1.11652	0.510506	0.746915	1.28307	1.28307
C2CD4C	10663	0.156723	0.458875	0.629254	-1.58918	0.743118	0.958229	1.09652	1.09652	0.943259	0.98137	1.02063	1.02063
C2CD5	46859.1	0.459984	0.780016	0.90738	-1.10207	0.434835	0.801103	1.10319	1.10319	0.954903	0.985922	0.992801	-1.00725
C2orf15	816	0.0164009	0.0983096	0.609105	-1.64175	0.64183	0.914207	1.10494	1.10494	0.158478	0.393896	1.36524	1.36524
C2orf16	1344	0.0369206	0.179291	1.30019	1.30019	0.00126599	0.0142507	1.51365	1.51365	6.2587e-08	1.53838e-06	2.02143	2.02143
C2orf27A	613.038	0.00406313	0.0328134	1.48244	1.48244	0.239937	0.619941	0.9112	-1.09745	0.00363112	0.0243249	1.5003	1.5003
C2orf40	125	0.588306	0.85632	0.0196434	-50.9077	0.995612	1	0.955552	-1.04652	0.605675	0.81171	80.0004	80.0004
C2orf42	5357	0.610071	0.868042	0.938939	-1.06503	0.509144	0.846482	0.920336	-1.08656	0.858063	0.945922	0.974941	-1.0257
C2orf43	25120.2	0.89737	0.991114	0.977293	-1.02323	0.59161	0.89164	0.906532	-1.10311	0.852891	0.94352	0.967115	-1.034
C2orf44	34956.7	0.270122	0.613013	1.13432	1.13432	0.518875	0.853	0.925976	-1.07994	0.720172	0.879723	1.04219	1.04219
C2orf47	14908.1	0.390819	0.730534	1.22851	1.22851	0.854008	0.994016	1.04658	1.04658	0.539071	0.767464	1.16075	1.16075
C2orf48	827	0.113193	0.376942	0.496499	-2.0141	0.197344	0.567029	0.566588	-1.76495	0.0986775	0.288488	0.467118	-2.14079
C2orf49	23933.9	0.731274	0.931904	0.940839	-1.06288	0.740941	0.957049	0.943148	-1.06028	0.406855	0.662818	0.8606	-1.16198
C2orf50	112	0.467106	0.784775	0.75005	-1.33324	0.460701	0.818891	1.24435	1.24435	0.222162	0.482079	1.49642	1.49642
C2orf57	13	0.0522806	0.227278	149.889	149.889	0.239163	0.619207	74.8563	74.8563	0.0344617	0.137882	325.262	325.262
C2orf61	55	0.602003	0.864329	0.717594	-1.39354	0.333732	0.718065	1.71501	1.71501	0.62827	0.824681	1.21916	1.21916
C2orf66	127	0.135068	0.41835	3.64208	3.64208	0.292875	0.679443	1.99844	1.99844	0.0131776	0.0674811	6.73975	6.73975
C2orf68	29575	0.612216	0.868689	0.914895	-1.09302	0.624724	0.905665	0.917809	-1.08955	0.790844	0.913728	0.955036	-1.04708
C2orf69	21652	0.735762	0.934406	0.933637	-1.07108	0.789787	0.975533	1.05396	1.05396	0.555989	0.778656	0.885811	-1.12891
C2orf70	50	0.304438	0.649385	1.02536	1.02536	0.729895	0.952859	2.09082	2.09082	0.849636	0.941892	1.39552	1.39552
C2orf71	27	0.00123221	0.0124695	99.7154	99.7154	0.00106222	0.0123626	122.501	122.501	0.000351517	0.00347622	764.924	764.924
C2orf72	4443	0.333412	0.678244	0.56321	-1.77554	0.85706	0.994288	0.911283	-1.09735	0.0508233	0.181977	2.31164	2.31164
C2orf73	16	0.00120366	0.0122376	0.00519795	-192.383	0.382675	0.762968	1.57167	1.57167	0.971848	0.990052	0.927323	-1.07837
C2orf74	231	0.185343	0.504497	4.00347	4.00347	0.522686	0.855142	1.92787	1.92787	0.0486437	0.176354	14.0254	14.0254
C2orf76	1794	0.209709	0.540266	1.15788	1.15788	0.855487	0.994016	1.02045	1.02045	0.0660163	0.219317	1.24419	1.24419
C2orf80	353	0.0610607	0.252477	196.798	196.798	1	1	1	-1	0.0217105	0.098114	11565.7	11565.7
C2orf81	1616.78	0.230241	0.569052	2.03249	2.03249	0.0613947	0.281029	2.84251	2.84251	0.0346141	0.138435	3.25096	3.25096
C2orf82	764	0.0588544	0.246896	1.51526	1.51526	0.715063	0.947251	1.08063	1.08063	0.930667	0.976386	1.0005	1.0005
C2orf88	10263	0.0217053	0.120907	1.98801	1.98801	0.0719019	0.312639	1.73442	1.73442	0.0142859	0.0717267	2.07169	2.07169
C3	4089	0.441203	0.766292	3.35408	3.35408	0.00513645	0.0445303	49.0459	49.0459	0.197507	0.450406	6.71677	6.71677
C3AR1	45	0.306932	0.652093	1.59369	1.59369	0.661373	0.923003	1.17676	1.17676	0.672793	0.851107	1.14222	1.14222
C3orf14	1198.99	0.982535	1	0.749669	-1.33392	0.827821	0.987506	1.68894	1.68894	0.972752	0.990393	98.7999	98.7999
C3orf17	47162.7	7.49817e-33	2.18689e-30	0.743972	-1.34414	2.74856e-20	5.31779e-18	0.828551	-1.20693	1.5165e-42	7.05572e-40	0.671613	-1.48895
C3orf18	585.816	0.885888	0.987677	0.81558	-1.22612	0.907682	1	1.1677	1.1677	0.307374	0.570191	3.50945	3.50945
C3orf20	82	0.00518142	0.0399409	3.94427	3.94427	0.0739248	0.317238	1.85413	1.85413	0.00466538	0.0298124	4.10893	4.10893
C3orf22	24	0.327533	0.672798	0.369082	-2.70942	0.551515	0.871236	6.51205	6.51205	0.297655	0.56237	0.254065	-3.93601
C3orf33	4790.56	8.07137e-05	0.00124682	1.35603	1.35603	0.000486409	0.00650123	1.31336	1.31336	0.000176521	0.00191846	1.33569	1.33569
C3orf35	428	0.00247275	0.0220137	1.76959	1.76959	0.472585	0.826156	1.09331	1.09331	0.0793964	0.248317	1.29253	1.29253
C3orf38	15990.2	0.798841	0.959028	1.06151	1.06151	0.535826	0.862587	0.858157	-1.16529	0.719928	0.879697	1.08728	1.08728
[truncated: 17,542 more rows]

## Sheet: Filtered 409 Genes
Gene symbol	Total reads	P-value (SMARCB1_Null vs. Wildtype)	FDR step up (SMARCB1_Null vs. Wildtype)	Ratio (SMARCB1_Null vs. Wildtype)	Fold change (SMARCB1_Null vs. Wildtype)	P-value (SMARCA4_Null vs. Wildtype)	FDR step up (SMARCA4_Null vs. Wildtype)	Ratio (SMARCA4_Null vs. Wildtype)	Fold change (SMARCA4_Null vs. Wildtype)	P-value (SMARCB1-SMARCA4_Null vs. Wildtype)	FDR step up (SMARCB1-SMARCA4_Null vs. Wildtype)	Ratio (SMARCB1-SMARCA4_Null vs. Wildtype)	Fold change (SMARCB1-SMARCA4_Null vs. Wildtype)
AACS	22473	2.96635e-38	1.93218e-35	0.468028	-2.13663	2.69074e-06	7.48999e-05	0.789863	-1.26604	1.42575e-26	3.48257e-24	0.554011	-1.80502
ABCB1	47680.6	6.84789e-08	2.31513e-06	5.8571	5.8571	0.267966	0.650151	0.574177	-1.74162	0.733797	0.891704	1.15114	1.15114
ABCG2	2262	5.53711e-20	8.58736e-18	20.838	20.838	4.03736e-14	4.50983e-12	10.5129	10.5129	3.05625e-14	2.14828e-12	10.3969	10.3969
ABTB2	6704	1.4247e-06	3.65354e-05	0.409697	-2.44083	0.435189	0.80964	1.16939	1.16939	0.00621499	0.0373109	0.611223	-1.63606
ACBD7	10374	2.05799e-34	1.0869e-31	0.311621	-3.20903	4.0325e-34	3.03073e-31	0.315153	-3.17306	5.32028e-17	5.19818e-15	0.506954	-1.97256
ACTA2	12194	2.8749e-115	1.40446e-111	14.1162	14.1162	2.71398e-06	7.54394e-05	0.560239	-1.78495	1.21035e-43	8.7598e-41	4.84718	4.84718
ACTN2	3986.18	3.5369e-07	1.02089e-05	3.32929	3.32929	0.000103166	0.00180643	2.44959	2.44959	8.39862e-06	0.000141237	2.79847	2.79847
ACVR1C	28486.3	1.02312e-27	3.12386e-25	28.1395	28.1395	2.55369e-08	1.15246e-06	0.10767	-9.28766	7.95981e-17	7.44223e-15	12.5239	12.5239
ADAMTS3	23511	1.43031e-36	8.22052e-34	3.05023	3.05023	1.00093e-09	5.66935e-08	1.68695	1.68695	1.90772e-62	2.66277e-59	4.6029	4.6029
ADAMTS6	2718	2.55346e-07	7.64123e-06	4.6934	4.6934	0.344561	0.735934	1.22836	1.22836	5.91436e-08	1.60295e-06	5.47903	5.47903
ADM	14939	7.66639e-06	0.000166825	5.4539	5.4539	5.65054e-06	0.000144804	5.57276	5.57276	6.93512e-07	1.51927e-05	6.43493	6.43493
ALDH1A2	23101.3	3.62075e-05	0.000649111	0.247653	-4.03791	0.00017626	0.00282089	0.0226773	-44.0969	0.0987959	0.288403	0.00141255	-707.938
AMBN	1354	1.66509e-05	0.000330666	78.2437	78.2437	5.22416e-06	0.000135752	0.00288936	-346.097	0.000125857	0.00148423	13.654	13.654
ANKRD34B	2911	2.9137e-09	1.28236e-07	0.346556	-2.88553	0.00780626	0.0602695	1.53351	1.53351	0.436761	0.698025	1.12892	1.12892
APOLD1	4128.01	3.28751e-08	1.18377e-06	0.202219	-4.94513	0.983081	1	0.990768	-1.00932	4.92578e-05	0.000675946	0.323768	-3.08863
ARHGAP23	4355	2.18895e-17	2.62419e-15	10.2006	10.2006	5.55051e-11	3.94409e-09	5.59631	5.59631	3.75547e-28	1.06356e-25	27.1197	27.1197
ARHGAP5-AS1	1871	3.26092e-05	0.000600016	0.473925	-2.11004	8.96678e-05	0.00161048	0.543689	-1.83929	0.000191643	0.0021098	0.59395	-1.68364
ARHGEF6	73427	8.77443e-06	0.000186777	3.373	3.373	0.762278	0.972239	1.10546	1.10546	0.0827066	0.255723	1.69165	1.69165
ARL4A	38769.8	7.70326e-43	5.78959e-40	3.6645	3.6645	2.2821e-08	1.03477e-06	1.73517	1.73517	2.82997e-37	1.45528e-34	3.3672	3.3672
ARX	8717	6.27281e-23	1.25079e-20	0.248488	-4.02433	1.03929e-35	8.46201e-33	0.160337	-6.23688	3.38544e-10	1.3126e-08	0.42485	-2.35377
ATRNL1	3023	1.46781e-08	5.65727e-07	15.4557	15.4557	0.0208783	0.125966	3.0389	3.0389	8.78648e-09	2.70815e-07	18.5299	18.5299
ATXN1	7952.47	1.53887e-06	3.90534e-05	2.87036	2.87036	0.000351148	0.00503063	2.18339	2.18339	9.067e-09	2.78582e-07	3.53711	3.53711
BAHCC1	28584	1.47046e-05	0.000296642	0.455217	-2.19675	0.735224	0.963776	0.938292	-1.06577	0.000325938	0.00332766	0.522873	-1.91251
BBS4	31103.2	1.22036e-66	2.98089e-63	2.68652	2.68652	2.43088e-38	2.26199e-35	1.87272	1.87272	1.71893e-82	4.1987e-79	3.38063	3.38063
BCAR3	2345.09	1.90306e-05	0.000371876	2.40208	2.40208	0.00148012	0.0160149	1.91203	1.91203	2.13875e-10	8.56419e-09	3.79034	3.79034
BCL2	8371.99	1.91776e-05	0.000374374	0.44145	-2.26526	0.240814	0.617246	0.798434	-1.25245	0.000440402	0.00430941	0.506637	-1.9738
BMP4	4148.99	1.32525e-05	0.000270885	0.313212	-3.19273	0.170235	0.513998	1.39691	1.39691	5.29439e-12	2.70832e-10	0.110197	-9.07464
BTG2	13946	5.8602e-20	8.94642e-18	0.48248	-2.07263	5.81118e-16	8.66842e-14	0.527318	-1.89639	7.39979e-12	3.69819e-10	0.582314	-1.71729
BVES	7559.6	3.05136e-23	6.14708e-21	4.6114	4.6114	3.57688e-05	0.000732661	1.84287	1.84287	2.22349e-26	5.08743e-24	5.18114	5.18114
C15orf27	6517.96	8.55402e-13	6.33159e-11	4.09497	4.09497	0.047558	0.225238	1.51186	1.51186	1.23758e-14	9.10007e-13	4.52759	4.52759
C1QTNF9B	2088.26	9.3133e-24	1.9999e-21	31.2957	31.2957	0.350595	0.741127	1.4755	1.4755	2.49963e-12	1.32732e-10	11.0395	11.0395
C21orf15	1646.35	5.15128e-06	0.000117457	13.9593	13.9593	0.124481	0.426021	2.51457	2.51457	8.67026e-07	1.85367e-05	16.6813	16.6813
C3orf58	23533	1.84757e-12	1.31764e-10	0.272761	-3.66621	3.06708e-08	1.36213e-06	0.38734	-2.58171	1.22015e-09	4.2806e-08	0.345421	-2.89501
C8orf82	25785.5	5.22392e-06	0.000118837	4.59063	4.59063	0.613192	0.912321	1.22915	1.22915	3.57129e-05	0.000512759	4.05163	4.05163
CAB39L	29289.2	4.51877e-05	0.000782914	7.55894	7.55894	1.18215e-05	0.000279665	8.65172	8.65172	8.94423e-05	0.0011168	7.04522	7.04522
CACNA2D2	26090.8	3.4938e-08	1.2527e-06	0.289716	-3.45165	0.144602	0.466357	0.763475	-1.3098	0.0013221	0.0106784	0.531221	-1.88245
CADPS2	4829.99	7.90103e-12	5.09552e-10	42.1721	42.1721	0.0016442	0.017406	6.33266	6.33266	8.96741e-11	3.74428e-09	33.962	33.962
CAMK2D	65405.6	4.66474e-18	6.20093e-16	2.0572	2.0572	0.000139519	0.0023322	1.38488	1.38488	4.77299e-10	1.80056e-08	1.69234	1.69234
CAPN3	2075	2.24313e-08	8.38107e-07	3.24519	3.24519	0.335873	0.727044	1.17131	1.17131	1.8595e-08	5.43145e-07	3.24706	3.24706
CAPN6	1254	1.63804e-10	8.40131e-09	0.117229	-8.53028	0.00283074	0.0270095	0.409599	-2.44141	0.0233858	0.104644	0.482718	-2.0716
CASC10	4046	1.02309e-29	3.73122e-27	0.160431	-6.23321	0.743028	0.966228	1.05013	1.05013	5.90633e-10	2.18177e-08	0.390408	-2.56143
CBFA2T3	2487.01	1.94718e-05	0.00037823	13.6954	13.6954	0.0336938	0.177183	2.56795	2.56795	4.76119e-08	1.30489e-06	87.7117	87.7117
CCDC109B	35121	3.90476e-05	0.000689277	2.15118	2.15118	0.379029	0.765237	1.20092	1.20092	0.0494846	0.178081	1.47875	1.47875
CCDC151	1269	4.56915e-05	0.00079014	2.021	2.021	9.36164e-07	2.89456e-05	2.6178	2.6178	1.43925e-07	3.59187e-06	3.01281	3.01281
CCDC39	9717	1.37594e-31	5.48717e-29	4.05504	4.05504	0.129303	0.436468	0.859554	-1.16339	3.22995e-47	2.62985e-44	6.96717	6.96717
CCPG1	17572.4	5.25333e-19	7.49309e-17	3.01425	3.01425	0.00159755	0.0170216	1.48128	1.48128	2.54434e-14	1.80796e-12	2.59387	2.59387
CDH10	27183	4.13318e-54	4.75097e-51	4.64045	4.64045	8.00027e-11	5.48538e-09	0.709884	-1.40868	5.53893e-55	5.69665e-52	4.80741	4.80741
CDH6	51225	1.94411e-05	0.000378009	0.0694323	-14.4025	0.00012312	0.00209389	0.260126	-3.84429	0.000252062	0.00267693	0.0260068	-38.4515
CDK6	43097.1	5.38147e-13	4.09164e-11	0.130921	-7.6382	0.000162621	0.00263716	0.451161	-2.2165	2.3703e-08	6.80148e-07	0.26781	-3.73399
CEACAM1	2178.98	1.60466e-22	3.07418e-20	23.6898	23.6898	5.4223e-08	2.26889e-06	5.48831	5.48831	3.03651e-15	2.41205e-13	12.2974	12.2974
CEP85L	16366.1	9.22029e-19	1.28696e-16	3.00257	3.00257	0.910078	1	0.989062	-1.01106	5.08193e-11	2.22161e-09	1.89815	1.89815
CITED1	8801.96	3.49753e-07	1.01402e-05	2.17394	2.17394	0.527197	0.867168	0.904016	-1.10618	3.43558e-05	0.000494729	1.89371	1.89371
CLCN5	96318.2	1.26944e-79	3.54374e-76	3.31519	3.31519	2.10587e-21	5.48677e-19	1.65694	1.65694	2.15467e-117	8.42089e-114	5.23645	5.23645
CLEC2B	3371	3.93834e-05	0.000693951	0.106807	-9.36265	1.55481e-05	0.000355768	0.0722292	-13.8448	1.75783e-05	0.000270897	0.0695981	-14.3682
CNTN4	3708.61	7.97283e-14	6.83321e-12	67.6465	67.6465	9.40423e-14	9.9874e-12	70.211	70.211	1.54744e-18	1.77873e-16	328.272	328.272
COBLL1	38062.2	4.18253e-07	1.18795e-05	0.420049	-2.38067	8.4227e-05	0.00152745	1.41201	1.41201	0.0317311	0.130814	0.903583	-1.10671
COL2A1	91711.4	6.39688e-08	2.18153e-06	0.291971	-3.425	5.89479e-09	2.99974e-07	0.238428	-4.19415	7.62152e-07	1.65849e-05	0.349297	-2.86289
CPEB3	6712.99	7.24432e-08	2.43232e-06	3.54121	3.54121	0.00151195	0.0162783	2.11245	2.11245	5.27663e-05	0.000718041	2.61323	2.61323
CPLX1	9766	3.49006e-05	0.000634027	3.40566	3.40566	0.0129688	0.0885477	2.16478	2.16478	8.02677e-07	1.72934e-05	4.23011	4.23011
CPNE8	14097	2.51529e-23	5.17381e-21	2.07092	2.07092	9.1812e-07	2.84326e-05	1.40542	1.40542	1.06613e-26	2.63711e-24	2.21471	2.21471
CPZ	4590	2.52864e-13	1.9983e-11	15.7215	15.7215	0.0203456	0.123854	2.50631	2.50631	4.09541e-29	1.25044e-26	65.2731	65.2731
CRB1	5039	2.42637e-05	0.000459435	50.0011	50.0011	0.0108984	0.0778954	0.333421	-2.99922	1.45842e-05	0.000228783	74.3797	74.3797
CREG1	44142	2.16125e-89	7.03883e-86	2.1578	2.1578	0.483634	0.842307	1.02342	1.02342	9.7695e-127	6.36353e-123	2.69706	2.69706
CRLF1	2257	1.85173e-16	2.10376e-14	0.31055	-3.22009	0.284439	0.670913	0.866916	-1.15351	0.9792	0.992992	0.995683	-1.00434
CROCC	15393	3.49193e-15	3.57256e-13	0.429416	-2.32874	0.122135	0.421324	0.849914	-1.17659	2.54424e-15	2.05442e-13	0.426149	-2.3466
CRYM	4379	7.04993e-11	3.81614e-09	0.0374573	-26.697	0.0355838	0.184246	0.577541	-1.73148	3.04466e-10	1.1923e-08	0.0784827	-12.7417
CSMD3	11702.1	2.41846e-10	1.21489e-08	2.82627	2.82627	0.00528222	0.0442434	1.48908	1.48908	2.24935e-19	2.7301e-17	5.61762	5.61762
CYBRD1	18964.1	7.60964e-27	2.12429e-24	2.20436	2.20436	9.4092e-24	2.96557e-21	2.08923	2.08923	4.71258e-21	6.77121e-19	1.98348	1.98348
CYLD	48361.3	8.04751e-14	6.86709e-12	2.95859	2.95859	0.439991	0.813653	1.03084	1.03084	1.00847e-14	7.52156e-13	3.51539	3.51539
CYP4F22	1354	1.68149e-05	0.000333246	9.42639	9.42639	6.94566e-09	3.50711e-07	20.6951	20.6951	1.10617e-07	2.84043e-06	17.6441	17.6441
CYP4F35P	1537.62	5.29888e-05	0.000897274	2.09287	2.09287	0.773629	0.976582	1.06819	1.06819	3.48558e-07	8.10853e-06	2.79128	2.79128
DAGLA	5917	8.16318e-10	3.85306e-08	2.67348	2.67348	0.00150529	0.0162333	1.6487	1.6487	2.08911e-17	2.13734e-15	4.08444	4.08444
DKFZP586I1420	5646	2.48458e-05	0.00046864	0.274326	-3.6453	0.016153	0.10366	0.523808	-1.9091	3.42506e-05	0.000493942	0.284068	-3.52029
DLGAP1	8087.02	4.71361e-10	2.27991e-08	0.220589	-4.53332	0.00018324	0.00291114	0.422447	-2.36716	0.00293714	0.0204252	0.508871	-1.96514
DLK2	4880.24	1.60358e-05	0.000320404	0.447377	-2.23525	0.256788	0.636379	0.954954	-1.04717	7.5215e-05	0.00096442	0.57561	-1.73729
DLL3	10423.9	2.79018e-23	5.67948e-21	2.3574	2.3574	5.05758e-09	2.61294e-07	1.43152	1.43152	1.37614e-29	4.26842e-27	3.15416	3.15416
DLX2	5463	1.63205e-15	1.74272e-13	2.79565	2.79565	1.40023e-11	1.07301e-09	2.41814	2.41814	1.2158e-13	8.05351e-12	2.60682	2.60682
DMRTA1	1133	8.4859e-08	2.81056e-06	0.294999	-3.38984	0.0557267	0.251143	1.51272	1.51272	0.000532444	0.00504314	0.486499	-2.0555
DNAJC22	1549	3.59956e-11	2.0507e-09	0.292899	-3.41414	0.891512	1	0.979543	-1.02088	0.025348	0.111134	0.679918	-1.47076
DOCK4	13249	3.23251e-32	1.46899e-29	7.41225	7.41225	6.13892e-07	2.00843e-05	2.30556	2.30556	1.95741e-27	5.2397e-25	6.19766	6.19766
DOCK8	2686.76	5.02251e-11	2.78031e-09	0.1412	-7.08218	0.01338	0.0905331	0.514187	-1.94482	2.24008e-06	4.29572e-05	0.264701	-3.77785
DRAM1	9243	2.82699e-14	2.5694e-12	2.16286	2.16286	1.97215e-13	1.96621e-11	2.10124	2.10124	1.61789e-23	2.87411e-21	2.79364	2.79364
DSG1	1093.52	6.23649e-09	2.61518e-07	8293.21	8293.21	1	1	1	-1	1.58828e-08	4.67418e-07	1263.26	1263.26
DUSP10	1398	1.3333e-05	0.000272246	2.66295	2.66295	0.000260546	0.0039376	2.05228	2.05228	1.94467e-07	4.76798e-06	4.11484	4.11484
DZANK1	12988	2.62714e-25	6.66714e-23	5.42498	5.42498	3.08724e-10	1.9274e-08	2.84671	2.84671	3.55181e-25	7.30589e-23	5.39672	5.39672
EAF2	2278	1.57533e-17	1.91202e-15	2.21921	2.21921	9.32978e-12	7.3811e-10	1.8419	1.8419	9.43195e-19	1.10365e-16	2.3021	2.3021
EFNA5	28526	2.85697e-21	4.94054e-19	0.491953	-2.03271	2.28231e-08	1.03477e-06	0.661896	-1.51081	3.97871e-21	5.80209e-19	0.493782	-2.02519
EGR1	8168	2.16815e-07	6.60965e-06	3.23497	3.23497	5.65243e-14	6.13635e-12	5.29773	5.29773	2.31118e-19	2.78782e-17	7.25293	7.25293
EGR3	3000.91	7.27931e-06	0.000159289	5.58185	5.58185	2.4553e-06	6.85416e-05	8.02856	8.02856	1.60415e-06	3.19589e-05	9.386	9.386
ELF1	5307.01	4.24895e-12	2.83375e-10	2.52244	2.52244	2.18136e-12	1.96433e-10	2.5543	2.5543	6.86117e-24	1.2769e-21	3.98104	3.98104
EMR2	3232.54	3.03844e-06	7.2496e-05	4.98527	4.98527	3.87429e-12	3.26325e-10	11.2243	11.2243	1.91462e-09	6.49541e-08	8.35869	8.35869
EPB41L4B	23690	2.63726e-30	1.03069e-27	0.282404	-3.54102	0.158969	0.493081	1.10301	1.10301	1.68234e-23	2.93524e-21	0.377747	-2.64727
EPDR1	15529	1.58395e-06	3.99896e-05	7.27715	7.27715	1.23468e-05	0.000289638	6.18576	6.18576	4.05045e-08	1.1291e-06	9.4016	9.4016
EPHB3	5898	3.37501e-11	1.93405e-09	0.30431	-3.28612	8.32623e-10	4.82798e-08	0.331819	-3.01369	1.4588e-05	0.000228783	0.471141	-2.1225
EPHB6	3704	6.71082e-18	8.46039e-16	0.186582	-5.35958	4.42965e-14	4.89038e-12	0.228612	-4.37423	1.25775e-05	0.000201291	0.438377	-2.28114
EPHX4	1250	5.27095e-07	1.4548e-05	4.10587	4.10587	6.38798e-06	0.000161068	3.56294	3.56294	3.86724e-09	1.26795e-07	5.26032	5.26032
ERBB4	9656	2.56109e-06	6.17856e-05	54.9985	54.9985	8.53359e-06	0.000208183	19.9711	19.9711	2.03238e-06	3.93605e-05	69.0894	69.0894
ERICH5	4358	2.53552e-10	1.27043e-08	3.1604	3.1604	1.10813e-11	8.59281e-10	3.41475	3.41475	1.84256e-12	1.00856e-10	3.5839	3.5839
ERMN	12384.9	2.10551e-11	1.26596e-09	0.00712306	-140.389	1.90584e-06	5.49744e-05	0.219934	-4.54683	5.5908e-12	2.85247e-10	0.00351982	-284.106
ERRFI1	7845	2.00207e-06	4.95221e-05	2.18568	2.18568	0.000420741	0.00580629	1.7934	1.7934	9.68244e-10	3.46529e-08	2.7356	2.7356
EXOC6	69732	8.67127e-39	6.05162e-36	2.29508	2.29508	1.05177e-26	4.67106e-24	1.98831	1.98831	8.51788e-28	2.34434e-25	2.01675	2.01675
FA2H	6589	2.46472e-06	5.97557e-05	0.192382	-5.19798	0.0221055	0.131017	1.73973	1.73973	0.000123126	0.00145874	0.307772	-3.24915
FAM126A	58606	5.86078e-32	2.43671e-29	0.465455	-2.14843	4.65818e-15	6.06837e-13	0.607667	-1.64564	5.46501e-30	1.84124e-27	0.478224	-2.09107
FAM179A	2447	5.61457e-14	4.85462e-12	10.0946	10.0946	1.32731e-18	2.5937e-16	15.0716	15.0716	7.43987e-23	1.24258e-20	20.4238	20.4238
FAM214A	19026	9.09566e-28	2.82124e-25	3.48637	3.48637	5.41805e-13	5.13952e-11	1.67968	1.67968	6.13928e-27	1.53805e-24	3.30324	3.30324
FAM43B	2123	1.85179e-06	4.61554e-05	6.61484	6.61484	2.40435e-11	1.78644e-09	15.238	15.238	1.10743e-18	1.28811e-16	32.6334	32.6334
FAM66B	1073.23	1.00887e-06	2.64623e-05	2.10575	2.10575	0.0717559	0.299612	1.27117	1.27117	2.86274e-09	9.52995e-08	2.68479	2.68479
FAM69A	9279.04	8.80844e-53	9.56254e-50	7.30959	7.30959	5.2221e-08	2.2017e-06	2.01835	2.01835	6.31364e-55	6.16874e-52	7.64742	7.64742
FAM95B1	6071.33	3.30498e-13	2.57301e-11	2.21881	2.21881	0.143444	0.464127	0.857313	-1.16644	4.05974e-26	9.11856e-24	3.41439	3.41439
FAS	6037.99	9.81371e-49	8.33782e-46	5.92457	5.92457	5.63008e-07	1.87104e-05	1.62017	1.62017	1.00884e-16	9.29894e-15	2.33204	2.33204
FAT4	24627.9	8.57133e-11	4.60144e-09	0.316556	-3.159	0.00236713	0.0234684	1.3568	1.3568	1.01726e-13	6.831e-12	0.183409	-5.45231
FCHO1	12793.9	1.00294e-06	2.6386e-05	2.91512	2.91512	0.00757232	0.0588821	1.83486	1.83486	1.08754e-07	2.79995e-06	3.20448	3.20448
FEZ1	40824.9	1.40074e-05	0.000285123	0.284118	-3.51966	0.000423161	0.00582337	0.410857	-2.43393	0.000808289	0.00712761	0.437314	-2.28669
FEZF1	7666.66	4.67978e-57	6.0965e-54	7.56317	7.56317	7.87539e-32	5.12976e-29	4.43744	4.43744	3.55362e-23	6.03836e-21	3.52669	3.52669
FGD4	22002	9.34784e-12	6.00875e-10	4.96321	4.96321	0.00174193	0.0182711	2.16753	2.16753	4.04088e-17	4.00827e-15	7.11899	7.11899
FGFR3	7764.92	7.34678e-13	5.50051e-11	0.369995	-2.70274	0.0023929	0.0236758	0.665115	-1.5035	8.78719e-05	0.00110188	0.589962	-1.69502
FHDC1	6443	1.99745e-21	3.54838e-19	9.53259	9.53259	0.00775825	0.0599699	1.76713	1.76713	8.70527e-32	3.20962e-29	18.8291	18.8291
FHIT	1488	2.87417e-07	8.48401e-06	0.268832	-3.7198	0.000100163	0.00176016	0.384292	-2.60219	8.49828e-12	4.19356e-10	0.155824	-6.41748
FKBP7	6108.01	7.61911e-06	0.000166166	0.475119	-2.10474	2.1578e-05	0.000472178	0.540347	-1.85066	8.34615e-06	0.000140597	0.481497	-2.07685
FLJ37453	2225	7.02462e-07	1.90122e-05	0.485076	-2.06153	0.224947	0.598559	0.860704	-1.16184	0.126443	0.341087	0.828771	-1.20661
FLNA	535212	3.22429e-14	2.87698e-12	0.381133	-2.62376	0.000162998	0.00264109	0.672317	-1.48739	4.26785e-13	2.63085e-11	0.406574	-2.45958
FMNL1	2865	2.99341e-06	7.15093e-05	4.54316	4.54316	7.74191e-07	2.44007e-05	6.19008	6.19008	6.9593e-08	1.86546e-06	12.6646	12.6646
FOLH1	2779.61	7.90586e-15	7.84205e-13	14.1384	14.1384	1.16225e-13	1.21452e-11	12.6062	12.6062	1.16661e-35	5.56017e-33	79.6499	79.6499
FOSL2	5447	3.0418e-11	1.76904e-09	3.41637	3.41637	9.73147e-36	8.26794e-33	10.2514	10.2514	4.29577e-22	6.76964e-20	5.92572	5.92572
FOXA2	1732	3.10438e-05	0.000572289	37.5864	37.5864	6.70069e-06	0.000168067	0.00480312	-208.198	1.28694e-05	0.000205331	94.893	94.893
FOXJ1	1358	8.37017e-08	2.78166e-06	21.8381	21.8381	0.283734	0.669942	2.30931	2.30931	8.80066e-13	5.11826e-11	71.6212	71.6212
FOXO4	26317.1	8.12102e-09	3.3409e-07	3.4779	3.4779	0.608926	0.910461	1.13452	1.13452	2.15099e-05	0.000323826	2.57624	2.57624
FRMD6	10798.6	9.04489e-19	1.27156e-16	0.309156	-3.23462	4.07941e-14	4.5293e-12	0.428588	-2.33324	1.51103e-15	1.26184e-13	0.390151	-2.56311
FSCN1	133441	1.60731e-11	9.87685e-10	0.332411	-3.00832	0.209292	0.575595	0.860041	-1.16274	1.07255e-05	0.000174365	0.546158	-1.83097
GALNT11	34475	1.21513e-58	1.69607e-55	2.11325	2.11325	6.94649e-31	3.87832e-28	1.66189	1.66189	6.94117e-69	1.04336e-65	2.29383	2.29383
GBX2	1701	1.68424e-11	1.03172e-09	3.1776	3.1776	0.445474	0.816599	0.880003	-1.13636	1.81931e-13	1.17331e-11	3.56621	3.56621
GEM	3593	2.54693e-21	4.44371e-19	4.14479	4.14479	1.49626e-19	3.17809e-17	3.65118	3.65118	1.67447e-23	2.93524e-21	4.93353	4.93353
GGACT	4139.61	8.35994e-06	0.000179321	2.42624	2.42624	0.00591292	0.0484391	1.73298	1.73298	0.000184601	0.00205076	2.13562	2.13562
GIMAP4	3191	4.71081e-07	1.31694e-05	1808.45	1808.45	0.166241	0.506831	3.7383	3.7383	0.0357108	0.142181	35.674	35.674
GLB1L3	5869.68	3.92168e-13	3.00523e-11	2.50675	2.50675	6.3332e-06	0.000159893	1.77059	1.77059	1.04657e-08	3.15116e-07	2.07632	2.07632
GLTSCR1L	14645	6.26004e-10	2.99089e-08	0.475437	-2.10333	2.82883e-08	1.26495e-06	1.89077	1.89077	0.749667	0.898168	0.956325	-1.04567
GOLM1	275000	9.96654e-16	1.08198e-13	3.48172	3.48172	2.81192e-16	4.43126e-14	3.55559	3.55559	6.29754e-28	1.758e-25	5.1559	5.1559
GPC3	168273	7.36098e-11	3.97351e-09	0.313519	-3.1896	5.89744e-31	3.38947e-28	3.17622	3.17622	2.17889e-15	1.77407e-13	0.0843476	-11.8557
GPLD1	5803.35	1.06178e-08	4.22569e-07	2.27649	2.27649	0.000464653	0.00627057	1.52053	1.52053	6.88644e-11	2.93816e-09	2.79424	2.79424
GPR158	3002.57	1.90107e-08	7.18545e-07	176.288	176.288	0.00153992	0.0164886	6.84955	6.84955	0.000371486	0.00371886	11.364	11.364
GPR176	16195	1.38425e-22	2.67817e-20	2.17093	2.17093	2.17917e-20	5.25718e-18	2.04474	2.04474	1.36475e-19	1.69864e-17	2.00676	2.00676
GRINA	100291	1.774e-07	5.52882e-06	0.490027	-2.0407	0.000160684	0.00261225	0.620063	-1.61274	4.51655e-05	0.000627858	0.592116	-1.68886
GRM8	5710	7.63537e-16	8.38218e-14	3.46449	3.46449	1.05929e-23	3.23432e-21	0.19286	-5.18512	9.83979e-12	4.81903e-10	2.78194	2.78194
GSN	18426.6	4.15679e-09	1.79311e-07	2.41249	2.41249	3.0692e-16	4.75994e-14	3.33669	3.33669	6.10095e-08	1.64894e-06	2.25824	2.25824
GSTP1	257344	2.34824e-49	2.18509e-46	0.428562	-2.33338	2.71539e-31	1.65817e-28	0.539182	-1.85466	9.06287e-62	1.18065e-58	0.364948	-2.74012
GUCY1B3	4757	3.3201e-05	0.000609184	0.385082	-2.59685	3.98579e-06	0.000106402	0.34327	-2.91316	1.43746e-05	0.000226163	0.379564	-2.63461
H2AFY2	30864	3.20264e-223	6.25828e-219	9.46398	9.46398	6.60717e-174	1.29111e-169	6.17517	6.17517	3.13376e-246	6.12369e-242	11.7231	11.7231
HACE1	13384	1.01431e-07	3.29246e-06	2.29675	2.29675	0.223448	0.597273	1.21132	1.21132	0.0002442	0.00261046	1.77567	1.77567
HAS3	9506.12	7.95879e-20	1.19633e-17	3.38436	3.38436	2.78121e-06	7.71985e-05	1.51447	1.51447	3.00278e-15	2.4048e-13	2.4864	2.4864
HDAC9	128075	1.16392e-06	3.0285e-05	0.271855	-3.67843	0.260321	0.641399	0.810315	-1.23409	1.3289e-06	2.705e-05	0.275716	-3.62692
HIST1H2BK	21745.5	7.84624e-08	2.6254e-06	3.34708	3.34708	0.206372	0.572422	1.38693	1.38693	1.11486e-06	2.30778e-05	3.03002	3.03002
HNMT	4186	2.25257e-14	2.08614e-12	0.0182559	-54.7768	0.00547379	0.045497	0.399584	-2.50261	5.46426e-17	5.286e-15	0.0067508	-148.131
HOMER2	63805.9	6.10878e-06	0.000136737	2.25149	2.25149	0.013106	0.0891728	1.60325	1.60325	0.0647792	0.215795	1.43239	1.43239
HOXC4	1468.26	4.63636e-08	1.62074e-06	5.22047	5.22047	0.1655	0.505879	1.5083	1.5083	5.19961e-10	1.93166e-08	6.37517	6.37517
HOXC5	1488.6	1.13135e-07	3.63615e-06	3.49912	3.49912	0.419251	0.798186	1.17456	1.17456	7.38262e-12	3.69819e-10	5.19369	5.19369
HOXC6	7900.14	5.78641e-32	2.43671e-29	2.8238	2.8238	0.0010695	0.0124018	1.31792	1.31792	2.64939e-39	1.47919e-36	3.24796	3.24796
HPGD	8739.93	1.52328e-05	0.000305924	0.00139358	-717.575	8.64199e-05	0.00156166	0.000346772	-2883.74	0.000128058	0.00150746	0.0122956	-81.3297
HS3ST3B1	2150.52	1.03109e-29	3.73122e-27	9.0278	9.0278	3.20368e-24	1.11791e-21	6.6039	6.6039	7.063e-33	3.13677e-30	10.8684	10.8684
HUNK	18240	2.47068e-07	7.40485e-06	0.469853	-2.12832	0.023323	0.136453	0.723375	-1.38241	0.000155582	0.00177829	0.580179	-1.72361
ID3	74581	3.00705e-08	1.09221e-06	2.3725	2.3725	0.00217651	0.021912	1.65944	1.65944	1.55522e-15	1.29322e-13	3.29318	3.29318
IFI35	3193	5.13969e-05	0.000873346	2.44731	2.44731	1.62191e-13	1.65072e-11	4.86646	4.86646	3.70007e-10	1.42329e-08	3.93285	3.93285
IFIH1	4275	1.15418e-26	3.17661e-24	10.8998	10.8998	2.29426e-15	3.15719e-13	5.76098	5.76098	6.93515e-39	3.76444e-36	19.3135	19.3135
IGF2	235279	2.04843e-14	1.92444e-12	233.871	233.871	0.373149	0.759798	0.5458	-1.83217	1.10395e-16	1.008e-14	490.355	490.355
IGSF9	2155	9.40777e-06	0.000198743	0.441867	-2.26312	0.0120037	0.0835639	0.659785	-1.51565	0.01753	0.0844143	0.658883	-1.51772
IL12RB2	1033	1.6162e-05	0.000321938	0.0897122	-11.1468	0.0623973	0.271318	0.438467	-2.28067	1.33099e-05	0.000210963	0.0831012	-12.0335
IL15RA	2295	2.11653e-27	6.17302e-25	15.1942	15.1942	4.99129e-25	1.9905e-22	11.7562	11.7562	5.95831e-30	1.90871e-27	20.3471	20.3471
IL17D	4768	3.37899e-17	4.00175e-15	2.18932	2.18932	2.00525e-08	9.19825e-07	1.66436	1.66436	7.94786e-10	2.88679e-08	1.74938	1.74938
ILDR2	4871	9.51061e-15	9.29234e-13	96.366	96.366	5.07126e-06	0.000132499	15.1093	15.1093	9.10882e-19	1.07226e-16	220.389	220.389
IRF7	2311	1.30311e-07	4.16531e-06	0.437139	-2.2876	0.788871	0.979641	0.967758	-1.03332	8.03167e-05	0.00102046	0.536739	-1.8631
ITGB1BP2	1316	1.83166e-05	0.000360812	2.19336	2.19336	0.0985118	0.36744	1.35744	1.35744	0.0553623	0.192969	1.43003	1.43003
ITM2A	106169	3.77122e-43	2.94774e-40	0.0903034	-11.0738	6.93624e-39	7.13374e-36	0.202617	-4.93541	6.63012e-30	2.08967e-27	0.0239374	-41.7756
JAKMIP2	9927.2	2.42907e-05	0.0004595	25.7862	25.7862	0.00444132	0.0388139	0.0183801	-54.4067	0.00938792	0.0518658	7.63449	7.63449
KCNC3	4567.64	4.17579e-12	2.79449e-10	5.61428	5.61428	3.58112e-10	2.21452e-08	4.49509	4.49509	5.38635e-21	7.62715e-19	18.4802	18.4802
KCNJ12	1263.96	4.88132e-05	0.000835254	17.0572	17.0572	0.000421909	0.00581699	9.85578	9.85578	3.58608e-07	8.3324e-06	61.8539	61.8539
KCNS3	8884.94	1.39799e-66	3.03534e-63	0.147659	-6.77238	4.21022e-10	2.571e-08	0.562425	-1.77802	5.18349e-88	1.68818e-84	0.0923604	-10.8271
KCTD13	19722.9	2.66882e-42	1.93153e-39	2.27211	2.27211	1.71827e-28	8.83599e-26	1.9341	1.9341	1.43362e-75	2.54677e-72	3.13432	3.13432
LANCL3	1128	4.23085e-07	1.19646e-05	0.0251177	-39.8125	1.20559e-05	0.000284105	0.0531048	-18.8307	1.52107e-06	3.05167e-05	0.0377307	-26.5036
LAYN	6885	2.74736e-07	8.1466e-06	0.41214	-2.42636	0.179449	0.530534	0.808691	-1.23657	3.12226e-10	1.21781e-08	0.328065	-3.04817
LBH	39955	6.47146e-06	0.000143053	0.0385244	-25.9576	0.887457	1	1.02803	1.02803	2.05253e-06	3.97114e-05	0.195546	-5.11387
LINC00883	7903	2.04581e-15	2.17267e-13	2.75252	2.75252	0.672807	0.939161	1.05424	1.05424	5.20233e-06	9.15021e-05	1.79069	1.79069
LINC01116	1250	2.28305e-17	2.72031e-15	3.5026	3.5026	0.584807	0.901141	0.941806	-1.06179	2.06378e-12	1.11713e-10	2.77804	2.77804
LINC01234	3003	3.22043e-14	2.87698e-12	0.359756	-2.77967	0.214496	0.581522	1.17475	1.17475	1.10905e-16	1.008e-14	0.32716	-3.05661
LIX1	15667	3.0885e-08	1.11971e-06	103.194	103.194	0.0124045	0.0856827	8.93936	8.93936	5.34019e-10	1.98012e-08	179.663	179.663
LOC100287846	4795.17	3.61505e-09	1.57331e-07	0.469707	-2.12898	0.0516149	0.238047	1.27704	1.27704	4.78282e-08	1.30898e-06	0.499724	-2.00111
LOC100505549	3515.55	2.05383e-11	1.2387e-09	2.04906	2.04906	0.0036716	0.0332315	0.783574	-1.2762	1.00488e-08	3.03499e-07	1.75682	1.75682
LOC100506790	1045	5.42715e-05	0.000916419	0.0721246	-13.8649	0.495893	0.849723	1.29422	1.29422	0.00053565	0.00506638	0.00644981	-155.043
LOC101927248	2120	3.13528e-15	3.24161e-13	0.276233	-3.62013	0.00327275	0.0303237	0.67503	-1.48142	9.54801e-09	2.91073e-07	0.436931	-2.28869
LOC101927750	1261	1.09797e-24	2.64881e-22	11.7941	11.7941	4.81567e-20	1.13377e-17	6.27396	6.27396	1.64168e-20	2.15302e-18	6.64959	6.64959
LOC101928865	1886	2.35115e-14	2.15699e-12	3.03568	3.03568	0.000330488	0.00478375	1.52402	1.52402	4.71638e-17	4.6313e-15	3.69622	3.69622
LOC101929524	1151	2.36675e-11	1.39724e-09	4.22428	4.22428	6.58966e-14	7.11428e-12	6.19501	6.19501	4.78121e-06	8.43228e-05	2.21482	2.21482
LOC388692	2390.43	4.25667e-05	0.000744004	3.30249	3.30249	0.0455726	0.218643	1.80158	1.80158	0.000188802	0.00209149	3.01193	3.01193
LOC389895	1858	2.40641e-13	1.91153e-11	0.191718	-5.21601	0.267625	0.649809	0.811076	-1.23293	0.00467016	0.0296201	0.55661	-1.79659
LOC642366	7540.87	4.99661e-06	0.000114331	2.49148	2.49148	0.0667819	0.285132	1.47321	1.47321	5.99101e-14	4.09337e-12	4.50417	4.50417
LPPR4	2158.01	4.4869e-06	0.000103639	9.04843	9.04843	0.000307703	0.00451074	0.25204	-3.96763	1.03975e-05	0.000169315	7.68192	7.68192
LRP4	51452	1.64292e-14	1.56607e-12	2.4787	2.4787	0.000574316	0.00740284	1.51702	1.51702	8.05949e-18	8.60604e-16	2.74736	2.74736
LRRC1	30005	8.01359e-07	2.14512e-05	0.223879	-4.4667	0.00337411	0.0311595	0.510286	-1.95969	6.60504e-07	1.45185e-05	0.218312	-4.5806
LRRC2	3125	3.20139e-05	0.000589617	0.0180214	-55.4895	0.930449	1	1.00154	1.00154	3.14013e-05	0.000457237	0.0178462	-56.0342
LRRC37A3	8729.23	9.18892e-07	2.43637e-05	2.10958	2.10958	0.0255759	0.146006	0.837104	-1.19459	7.64511e-07	1.66177e-05	2.13813	2.13813
LRRIQ1	3685	4.18767e-05	0.000732599	3.22807	3.22807	0.00603544	0.0492848	1.55025	1.55025	8.89279e-06	0.000148271	4.76713	4.76713
LRRTM2	1474.79	2.97142e-08	1.08127e-06	19.8792	19.8792	0.0135701	0.0911896	4.05694	4.05694	8.80478e-05	0.0011022	9.06144	9.06144
LSAMP	12274	1.14755e-06	2.9939e-05	291.464	291.464	0.349137	0.739475	3.06973	3.06973	4.39593e-06	7.81628e-05	339.618	339.618
LSR	38644.1	1.24656e-05	0.000257496	0.280925	-3.55966	0.615918	0.913171	0.905689	-1.10413	0.00597859	0.036136	0.529444	-1.88877
LYPD6	3452	1.31342e-08	5.14339e-07	0.124699	-8.01933	0.00050754	0.00674224	0.301168	-3.3204	1.61548e-13	1.0629e-11	0.049064	-20.3815
MAMDC2	1544	1.61466e-05	0.000321938	6.34941	6.34941	0.228861	0.603514	1.71895	1.71895	2.97662e-11	1.35585e-09	28.569	28.569
MAMLD1	5231.01	2.66285e-07	7.92005e-06	0.166971	-5.98908	1.62537e-07	6.13154e-06	0.170196	-5.87559	6.03622e-05	0.0008035	0.270835	-3.69229
MAP1B	317710	2.13451e-05	0.000409327	0.320662	-3.11855	0.674937	0.939729	1.08129	1.08129	0.375833	0.643659	1.18006	1.18006
MAP3K8	5821	1.32139e-10	6.84914e-09	2.03263	2.03263	0.00110532	0.0126904	1.28735	1.28735	2.67212e-07	6.36003e-06	1.60675	1.60675
2015-03-03	6715	2.72428e-11	1.59387e-09	2.4039	2.4039	1.81444e-06	5.29194e-05	1.892	1.892	0.0287215	0.121904	1.3327	1.3327
MBD5	15682	1.3829e-18	1.90305e-16	2.17387	2.17387	0.00640302	0.051639	1.21906	1.21906	8.93863e-19	1.06506e-16	2.18965	2.18965
MCAM	12480	1.17831e-24	2.80797e-22	0.189938	-5.26486	7.62302e-07	2.40864e-05	0.493456	-2.02652	1.85211e-15	1.52709e-13	0.297486	-3.3615
MCU	46254.7	3.19578e-13	2.49795e-11	3.0417	3.0417	0.000833436	0.0100932	1.723	1.723	8.00693e-10	2.90285e-08	2.59122	2.59122
MEGF11	4642	1.24386e-10	6.499e-09	6.24053	6.24053	2.56249e-05	0.000545336	3.38971	3.38971	9.26136e-14	6.26215e-12	8.20476	8.20476
MEGF9	76431.7	7.9307e-06	0.000171431	4.41022	4.41022	0.931793	1	0.964144	-1.03719	0.000481465	0.00464607	3.30296	3.30296
METTL7A	4582	1.88905e-05	0.00036988	0.113603	-8.80261	0.000191865	0.00302357	0.184871	-5.40917	0.000310219	0.00319557	0.20342	-4.91594
METTL7B	3149	1.60166e-11	9.8732e-10	2.67504	2.67504	6.587e-23	1.92114e-20	4.24589	4.24589	1.09228e-25	2.37159e-23	4.6209	4.6209
MGC12916	2019	4.39703e-05	0.000765115	4.76005	4.76005	2.1978e-06	6.22423e-05	6.1655	6.1655	1.91561e-07	4.71448e-06	7.26446	7.26446
MID2	15966	1.13881e-13	9.49043e-12	2.15156	2.15156	3.55034e-14	4.01024e-12	2.21212	2.21212	2.17289e-17	2.21148e-15	2.687	2.687
MIPEP	30858.7	8.55795e-06	0.000182766	2.43518	2.43518	0.398551	0.782249	1.20691	1.20691	0.00177344	0.0134948	1.9098	1.9098
MMD	24001	1.49517e-05	0.000300896	0.197818	-5.05515	7.15493e-05	0.00132643	0.26961	-3.70907	0.000121537	0.00144477	0.293379	-3.40856
MMP17	38524	2.81031e-07	8.32066e-06	3.76956	3.76956	0.437985	0.812163	1.26775	1.26775	0.0126458	0.0650807	2.01246	2.01246
MOBP	27361.1	6.49879e-28	2.08185e-25	0.261856	-3.81889	2.30435e-11	1.72526e-09	0.589753	-1.69562	5.27562e-26	1.17149e-23	0.295204	-3.38749
MOXD1	1783	1.60407e-08	6.14612e-07	0.18069	-5.53435	3.46244e-09	1.82371e-07	0.165412	-6.0455	6.99388e-12	3.52235e-10	0.116705	-8.56862
MPP5	53855.4	3.30151e-52	3.39551e-49	2.34071	2.34071	5.61259e-14	6.12712e-12	1.49316	1.49316	6.37788e-85	1.78043e-81	3.12909	3.12909
MST1L	1889.85	3.87733e-05	0.000685054	0.400438	-2.49726	0.00288649	0.027414	0.527718	-1.89495	0.00123085	0.0100552	0.488744	-2.04606
MSX1	10075	2.33679e-10	1.17993e-08	0.425726	-2.34893	0.00815605	0.062403	0.716811	-1.39507	4.5501e-06	8.059e-05	0.549848	-1.81869
MT1E	31741.3	7.43485e-23	1.46752e-20	0.224484	-4.45466	0.0474944	0.224991	0.825594	-1.21125	4.13599e-21	5.98676e-19	0.258823	-3.86365
MT1F	4112	1.14138e-05	0.000238542	0.209201	-4.78009	0.841177	0.992554	0.956669	-1.04529	0.00951714	0.0524167	0.503722	-1.98522
MT2A	27946.2	3.8122e-17	4.48761e-15	0.322138	-3.10426	0.138428	0.454702	0.865471	-1.15544	9.29926e-15	6.96233e-13	0.372294	-2.68605
MVP	1811.66	3.66445e-05	0.000655142	2.27617	2.27617	2.00425e-13	1.98807e-11	8.79196	8.79196	2.56749e-09	8.5763e-08	4.14912	4.14912
NAPRT	13197	1.39082e-24	3.27446e-22	0.480173	-2.08258	0.0502869	0.234189	1.14763	1.14763	1.62682e-74	2.64913e-71	0.249348	-4.01045
NARS2	64495.1	2.58088e-119	2.52165e-115	2.59243	2.59243	9.8021e-14	1.03537e-11	1.34092	1.34092	2.25773e-180	2.20591e-176	3.35095	3.35095
NCOA1	47071.6	1.54728e-16	1.77855e-14	2.46763	2.46763	0.0246792	0.141933	1.29252	1.29252	2.79228e-20	3.61351e-18	2.72817	2.72817
NCOA4	182741	1.98686e-08	7.46641e-07	2.36378	2.36378	0.0350065	0.182195	1.42385	1.42385	0.00279091	0.0196248	1.62896	1.62896
NEDD9	62391.8	3.51458e-18	4.73645e-16	3.06583	3.06583	1.37097e-102	1.33951e-98	14.4365	14.4365	0.0477196	0.173363	1.30966	1.30966
NEK3	8802.97	1.2324e-27	3.64883e-25	8.3391	8.3391	1.12141e-24	4.21413e-22	7.39548	7.39548	5.56239e-30	1.84228e-27	9.17852	9.17852
NELL2	56025	1.82887e-08	6.96645e-07	5.08786	5.08786	0.00892184	0.0669001	0.152042	-6.57715	0.00903828	0.0502752	2.2844	2.2844
NEXN	5031.93	3.42514e-11	1.95704e-09	5.37246	5.37246	1.11115e-10	7.43594e-09	4.62729	4.62729	5.69076e-13	3.45352e-11	10.0367	10.0367
NFATC2	2487	3.32682e-11	1.91768e-09	0.0508173	-19.6783	0.969193	1	1.01981	1.01981	0.235505	0.497568	0.686137	-1.45743
NGEF	2608	2.46849e-09	1.1013e-07	0.109664	-9.11875	0.099631	0.370342	0.580331	-1.72316	0.00871533	0.0488403	0.413169	-2.42032
NLRP2	4943.74	3.67588e-06	8.65425e-05	31.7952	31.7952	2.80925e-14	3.22915e-12	447.683	447.683	1.54907e-05	0.000241006	25.756	25.756
NPNT	1561	1.23069e-05	0.000254486	0.0283564	-35.2655	0.000427756	0.00585758	0.0385607	-25.9332	0.00123083	0.0100552	0.0529103	-18.8999
NPW	23273	1.84502e-05	0.000362133	2.62407	2.62407	0.872098	0.999922	1.04412	1.04412	1.14303e-05	0.000184594	2.67946	2.67946
NPY1R	1624	5.47473e-11	3.0051e-09	0.119389	-8.376	2.94345e-10	1.84825e-08	0.147596	-6.77524	5.33603e-07	1.19577e-05	0.288686	-3.46397
NR3C2	2281	5.77915e-05	0.00096687	0.251867	-3.97035	0.301591	0.690363	0.843568	-1.18544	0.000199572	0.00218723	0.329623	-3.03377
NR4A3	3077	9.15926e-09	3.7059e-07	8.82262	8.82262	2.63015e-13	2.557e-11	16.3505	16.3505	6.8908e-15	5.26972e-13	21.1891	21.1891
NRG2	3719	5.75153e-08	1.9822e-06	2.43629	2.43629	8.54064e-05	0.0015453	1.86687	1.86687	4.12682e-15	3.2517e-13	3.66276	3.66276
NRG4	10485	1.54343e-11	9.54436e-10	2.08809	2.08809	1.48127e-05	0.000340535	1.28013	1.28013	5.0297e-10	1.87926e-08	1.76697	1.76697
NUAK2	2719	2.99343e-06	7.15093e-05	0.433898	-2.30469	4.27836e-07	1.45651e-05	2.65991	2.65991	0.00802707	0.045598	0.691012	-1.44715
NUDT11	70508.8	1.07003e-19	1.58406e-17	0.305	-3.27869	1.67976e-16	2.66863e-14	0.359179	-2.78413	5.69531e-21	8.00662e-19	0.285069	-3.50792
NXPE3	63141.2	2.47174e-08	9.16514e-07	2.97345	2.97345	0.887131	1	1.03526	1.03526	0.00010638	0.00129438	2.17721	2.17721
OCLN	26622.8	2.07013e-06	5.08834e-05	3.10926	3.10926	2.42166e-12	2.15098e-10	5.0617	5.0617	1.93758e-08	5.63425e-07	3.75311	3.75311
OLIG2	3518.97	3.81313e-32	1.69346e-29	0.124114	-8.05713	0.000153349	0.00252026	0.533372	-1.87486	3.09971e-27	7.96993e-25	0.149778	-6.67655
OPA1	220389	1.13352e-25	2.98534e-23	2.31604	2.31604	0.326843	0.718253	1.09057	1.09057	1.36847e-27	3.71405e-25	2.38859	2.38859
OSBPL7	3972	1.31327e-09	6.02411e-08	0.448763	-2.22835	0.466326	0.83132	0.926982	-1.07877	0.000490134	0.0047088	0.680047	-1.47049
OTX2	72894.7	4.33791e-18	5.80597e-16	0.0905126	-11.0482	9.28463e-12	7.37524e-10	0.33888	-2.9509	8.88234e-16	7.57947e-14	0.221225	-4.52029
P2RY2	4641.99	3.93877e-07	1.12525e-05	2.77386	2.77386	5.5199e-06	0.000142222	2.46316	2.46316	5.51461e-09	1.78117e-07	3.41364	3.41364
PABPC4L	10116	2.04402e-07	6.30002e-06	0.491468	-2.03472	6.87043e-11	4.79482e-09	0.402889	-2.48207	1.28205e-13	8.4637e-12	0.35225	-2.8389
PACSIN1	1980.12	2.23794e-07	6.76958e-06	0.218337	-4.58007	0.00968987	0.0714797	0.486212	-2.05671	0.0132549	0.0676102	0.492498	-2.03046
PAG1	3616	2.76682e-05	0.000514814	11.6231	11.6231	0.0844294	0.331558	1.98398	1.98398	1.63316e-06	3.23996e-05	30.1814	30.1814
PAM	50689.4	5.02852e-35	2.80749e-32	3.57802	3.57802	1.79053e-09	9.7734e-08	1.90584	1.90584	2.24082e-24	4.37878e-22	2.89208	2.89208
PAPSS2	72176	1.4138e-07	4.48492e-06	4.31439	4.31439	0.00047315	0.00636764	2.77392	2.77392	0.00514915	0.0322188	2.31152	2.31152
PAQR9	1783	4.63036e-09	1.97128e-07	2.38353	2.38353	3.09072e-06	8.48255e-05	1.90162	1.90162	1.77941e-10	7.16935e-09	2.6469	2.6469
PARP11	7407.01	1.50813e-11	9.35569e-10	0.486365	-2.05607	0.536257	0.871582	1.06002	1.06002	3.06528e-10	1.19797e-08	0.516699	-1.93536
PARP8	15503.8	6.49509e-11	3.53539e-09	2.14837	2.14837	1.10964e-10	7.43594e-09	2.13013	2.13013	1.2847e-14	9.36726e-13	2.47684	2.47684
PCDH11X	6570.53	8.76107e-08	2.88702e-06	4.01821	4.01821	0.67753	0.940773	1.11633	1.11633	3.17608e-22	5.0872e-20	13.3388	13.3388
PCDHB3	1102.92	1.79308e-05	0.000353926	0.326381	-3.0639	0.269017	0.651166	0.776862	-1.28723	0.941222	0.979696	0.985935	-1.01427
PCOLCE2	14379	5.97697e-18	7.63372e-16	2.29783	2.29783	3.32656e-15	4.51419e-13	2.13663	2.13663	3.131e-07	7.3537e-06	1.64583	1.64583
PDCD4-AS1	1729	1.92422e-08	7.25891e-07	2.3843	2.3843	0.00167054	0.0176455	1.60709	1.60709	2.11431e-13	1.35462e-11	3.25848	3.25848
PDE2A	1901.99	2.85481e-08	1.04273e-06	7.59358	7.59358	3.74106e-08	1.63544e-06	7.50225	7.50225	5.37651e-14	3.6864e-12	18.8087	18.8087
PDE3A	6685	1.78576e-05	0.000352836	1040.98	1040.98	0.075893	0.310321	2.04163	2.04163	1.83827e-05	0.000281518	991.471	991.471
PDGFD	1082	7.63678e-07	2.05269e-05	8.74328	8.74328	0.615401	0.913171	0.895635	-1.11653	5.88772e-05	0.000787487	4.68215	4.68215
PGM2	123869	3.7504e-15	3.81701e-13	4.32726	4.32726	0.00469755	0.0405096	1.80667	1.80667	1.2872e-05	0.000205331	2.39185	2.39185
PHACTR2	31393	4.7176e-29	1.58942e-26	5.60744	5.60744	1.15594e-17	2.05348e-15	3.7557	3.7557	2.10692e-25	4.47514e-23	4.97484	4.97484
PIGB	6049.63	4.38031e-17	5.12548e-15	2.32077	2.32077	8.97381e-07	2.79231e-05	1.42669	1.42669	1.89804e-15	1.55839e-13	2.12499	2.12499
PIP5K1B	2287.01	1.56395e-18	2.13715e-16	24.4331	24.4331	9.55583e-25	3.66138e-22	41.6053	41.6053	6.10033e-07	1.35308e-05	5.79925	5.79925
PKN2-AS1	8311	3.43308e-08	1.23319e-06	0.0987394	-10.1277	0.970314	1	0.992332	-1.00773	7.69979e-08	2.04431e-06	0.113662	-8.79804
PLCL2	45844.6	2.57175e-49	2.2843e-46	0.379101	-2.63782	0.410129	0.791695	0.950722	-1.05183	1.74765e-77	3.41507e-74	0.283012	-3.53342
PLS1	17914.2	7.75118e-25	1.91729e-22	2.12815	2.12815	4.94975e-23	1.48805e-20	2.05894	2.05894	1.49798e-20	1.9913e-18	1.96529	1.96529
POPDC3	5428.01	1.88238e-44	1.53265e-41	8.41315	8.41315	3.86118e-06	0.000103358	2.06682	2.06682	5.2651e-43	3.67447e-40	8.12451	8.12451
PPAP2A	35306.7	1.877e-34	1.01885e-31	2.97165	2.97165	2.40205e-27	1.11758e-24	2.64478	2.64478	3.18495e-46	2.48949e-43	3.52067	3.52067
PPP2R3A	49443.4	7.28978e-08	2.44339e-06	2.25447	2.25447	6.88771e-05	0.00128674	1.84244	1.84244	0.00416393	0.0269518	1.56164	1.56164
PRDM6	1214	4.20783e-09	1.80715e-07	9.36666	9.36666	1.7908e-05	0.000401768	5.25424	5.25424	1.90596e-06	3.7096e-05	6.13455	6.13455
PRDX6	438209	1.02875e-08	4.11942e-07	3.20828	3.20828	2.80699e-05	0.0005898	2.29916	2.29916	1.68211e-11	7.97818e-10	3.79184	3.79184
PRKAA2	43601	1.74573e-13	1.42139e-11	2.32814	2.32814	0.239302	0.615747	1.1485	1.1485	1.44577e-07	3.60353e-06	1.83234	1.83234
PRKCQ	6640	1.83726e-23	3.81935e-21	7.88522	7.88522	1.481e-29	7.8217e-27	10.2701	10.2701	6.08491e-24	1.14332e-21	8.18871	8.18871
PRKCQ-AS1	8749.99	6.13676e-21	1.02494e-18	2.14867	2.14867	1.99499e-15	2.78457e-13	1.76788	1.76788	7.54995e-16	6.47077e-14	1.79588	1.79588
PROC	1169	5.45768e-05	0.000920177	3.14749	3.14749	3.32535e-18	6.13025e-16	11.0439	11.0439	0.014757	0.0737285	1.93572	1.93572
PRODH	11971	4.18093e-61	6.80829e-58	0.0931466	-10.7358	0.858612	0.99821	1.02398	1.02398	3.3287e-41	2.24297e-38	0.163795	-6.10519
PROS1	13291	1.14535e-12	8.28934e-11	4.49668	4.49668	4.24423e-06	0.000112992	2.7099	2.7099	1.25389e-11	6.04996e-10	4.18663	4.18663
PROX1	3939	8.5054e-13	6.31955e-11	0.0521434	-19.1779	5.2351e-08	2.2017e-06	0.135481	-7.38111	9.59143e-13	5.48029e-11	0.0528334	-18.9274
PRR7	13510.1	6.57783e-07	1.79271e-05	2.12791	2.12791	2.21809e-06	6.27154e-05	2.05445	2.05445	0.000864918	0.00755199	1.68164	1.68164
PRRG1	27622.9	8.95464e-29	2.96581e-26	0.459635	-2.17564	1.0937e-06	3.31933e-05	0.731719	-1.36664	8.11003e-33	3.52173e-30	0.42804	-2.33623
PRSS35	12805.1	4.84656e-60	7.28512e-57	3.93471	3.93471	1.37891e-90	6.73633e-87	5.82957	5.82957	4.54734e-59	4.93664e-56	3.86453	3.86453
PTPN21	10012	3.16043e-06	7.50401e-05	3.50815	3.50815	1.32453e-06	3.95759e-05	4.74973	4.74973	1.54274e-06	3.09196e-05	4.48157	4.48157
QPCT	3103	1.6644e-37	1.04916e-34	18.1418	18.1418	2.29428e-38	2.24163e-35	19.8653	19.8653	5.90959e-36	2.96101e-33	15.4179	15.4179
RAP1GAP2	19215.4	1.65152e-21	2.98818e-19	0.368516	-2.71359	5.41441e-20	1.25956e-17	2.51406	2.51406	0.064691	0.215537	0.870367	-1.14894
RAP1GDS1	61436.2	7.06287e-18	8.7908e-16	3.27307	3.27307	0.0598682	0.263253	1.33425	1.33425	5.59922e-11	2.41533e-09	2.52036	2.52036
RASAL2	55056.2	2.12528e-20	3.4041e-18	2.90357	2.90357	9.30961e-11	6.31664e-09	2.12499	2.12499	4.83677e-24	9.17624e-22	3.20242	3.20242
RASD1	1073	3.56003e-05	0.000641167	2.59514	2.59514	0.00091635	0.010892	1.88631	1.88631	2.34337e-08	6.744e-07	7.45426	7.45426
RASGEF1C	2489	1.94873e-19	2.8418e-17	3.91015	3.91015	1.11411e-11	8.60509e-10	2.57305	2.57305	5.91297e-21	8.25323e-19	4.23661	4.23661
RELB	2704	4.47326e-06	0.000103446	2.16673	2.16673	2.05118e-07	7.506e-06	3.07297	3.07297	1.43497e-07	3.59036e-06	3.22917	3.22917
REPS2	6605.99	4.86223e-07	1.35733e-05	0.326766	-3.06029	1.67196e-10	1.10006e-08	5.53597	5.53597	0.0361704	0.143572	0.686171	-1.45736
RGCC	1724	3.18868e-14	2.87143e-12	2.60146	2.60146	3.21553e-07	1.13161e-05	1.89041	1.89041	5.6315e-18	6.14777e-16	2.99941	2.99941
RGS20	5248	9.13608e-33	4.57764e-30	5.40431	5.40431	3.90943e-49	7.63941e-46	8.66011	8.66011	4.50514e-53	4.17304e-50	9.56732	9.56732
RNF157	150325	9.10709e-10	4.28823e-08	4.19592	4.19592	0.386701	0.771546	1.27533	1.27533	3.86702e-13	2.40654e-11	5.29116	5.29116
RNF217	7113.54	9.27539e-13	6.83964e-11	2.84446	2.84446	3.11137e-11	2.28569e-09	2.47554	2.47554	9.58912e-13	5.48029e-11	2.84007	2.84007
RORA	13836.8	3.19156e-09	1.39835e-07	0.0733514	-13.633	1.46778e-06	4.35894e-05	0.153761	-6.5036	1.8638e-08	5.4359e-07	0.103147	-9.69487
RPAP3	62306	5.90223e-08	2.03055e-06	3.38087	3.38087	0.968039	1	1.01187	1.01187	0.0373518	0.146771	1.67598	1.67598
RSPH4A	2051	2.78168e-08	1.01983e-06	3.66033	3.66033	3.96321e-06	0.000105944	2.36644	2.36644	8.16067e-08	2.14051e-06	3.28803	3.28803
SAMD4A	44571.4	1.08472e-10	5.72881e-09	2.59904	2.59904	9.02375e-12	7.22676e-10	2.73786	2.73786	3.12467e-16	2.75041e-14	3.29791	3.29791
SAMD5	1871	1.44336e-06	3.69656e-05	8.00855	8.00855	1.01105e-05	0.000242119	7.42901	7.42901	3.76919e-07	8.70612e-06	9.42942	9.42942
SDSL	1829	3.82913e-24	8.90773e-22	0.199671	-5.00825	1.59984e-07	6.04688e-06	2.14634	2.14634	0.000160877	0.0018288	0.58282	-1.7158
SEMA3G	2078	1.25457e-10	6.5375e-09	11.5045	11.5045	4.39484e-13	4.20978e-11	23.4695	23.4695	1.1592e-09	4.08881e-08	9.24768	9.24768
SERPINE2	4382.98	1.37209e-05	0.000279875	3.43259	3.43259	0.992743	1	1.0026	1.0026	1.87411e-22	3.0368e-20	15.6612	15.6612
SERPINF1	2852	2.63592e-34	1.35549e-31	0.218245	-4.582	1.044e-23	3.23432e-21	0.299813	-3.33541	1.64519e-22	2.70156e-20	0.310217	-3.22355
SESN1	35058.9	1.84056e-05	0.000362133	5.31223	5.31223	0.0398839	0.19943	2.39367	2.39367	1.42919e-06	2.88212e-05	6.39709	6.39709
SETD6	12340.4	3.76716e-08	1.34332e-06	0.476638	-2.09803	0.0352208	0.18293	0.760727	-1.31453	3.68341e-14	2.56148e-12	0.341676	-2.92675
SGK1	2889	3.01967e-10	1.49765e-08	10.2457	10.2457	0.0749991	0.307726	1.92817	1.92817	0.00515689	0.0322467	2.91258	2.91258
SH3GL3	47206.5	9.16617e-94	3.58232e-90	5.21491	5.21491	0.801468	0.981837	1.02432	1.02432	1.42676e-21	2.16126e-19	2.21667	2.21667
SHROOM1	11297	6.97701e-09	2.9008e-07	2.18121	2.18121	7.95527e-07	2.49525e-05	1.94244	1.94244	9.65163e-06	0.00015889	1.8262	1.8262
SIDT2	19146.8	1.30347e-09	5.9932e-08	2.11648	2.11648	2.13687e-10	1.38267e-08	2.1913	2.1913	9.33415e-14	6.28961e-12	2.50046	2.50046
SIRPA	22713	1.46659e-06	3.74624e-05	2.15209	2.15209	5.58164e-05	0.00107884	1.91118	1.91118	6.86007e-07	1.50452e-05	2.21214	2.21214
SKIDA1	3445.09	5.08618e-14	4.41729e-12	0.165338	-6.04823	0.208462	0.574803	0.77515	-1.29007	0.000275236	0.00289005	0.483501	-2.06825
SLC12A2	86711.7	1.03717e-07	3.36109e-06	4.37646	4.37646	0.525573	0.866514	0.787454	-1.26992	0.884963	0.958289	1.05179	1.05179
SLC16A12	3862.87	9.88932e-16	1.07959e-13	47.3994	47.3994	2.79998e-14	3.22915e-12	34.0329	34.0329	0.81769	0.929755	0.892985	-1.11984
SLC16A6	15202	4.47174e-32	1.94183e-29	2.58701	2.58701	3.53637e-49	7.63941e-46	3.80353	3.80353	6.31427e-40	3.62903e-37	3.07779	3.07779
SLC17A7	2683	7.12721e-09	2.95696e-07	2.91948	2.91948	5.94661e-15	7.59495e-13	4.41324	4.41324	3.7138e-25	7.55952e-23	8.10701	8.10701
SLC17A8	4706.92	4.06725e-11	2.29044e-09	88.4656	88.4656	7.25359e-15	9.14467e-13	684.081	684.081	1.25256e-07	3.17461e-06	21.0095	21.0095
SLC2A5	1747	1.18104e-06	3.06898e-05	0.000885482	-1129.33	3.2826e-05	0.000678068	21.049	21.049	0.000372034	0.00372243	0.190965	-5.23657
SLC35G1	11843	5.57907e-18	7.17241e-16	2.09495	2.09495	1.09313e-08	5.30248e-07	1.6354	1.6354	1.26283e-14	9.24228e-13	1.93548	1.93548
SLC44A3	1773	3.86124e-13	2.97057e-11	5.42593	5.42593	1.76518e-18	3.41519e-16	7.88739	7.88739	2.78869e-18	3.14994e-16	7.93292	7.93292
SLC6A15	3796	4.09531e-05	0.00071837	6.92391	6.92391	0.32292	0.71463	0.661617	-1.51145	1.81703e-09	6.19661e-08	26.621	26.621
SLC7A3	274635	4.62699e-29	1.58625e-26	30.3177	30.3177	0.000181906	0.00289229	3.55988	3.55988	3.84752e-41	2.50614e-38	58.2779	58.2779
SLC9A2	2620	2.86195e-15	2.97476e-13	41.8129	41.8129	4.45219e-20	1.06098e-17	87.9817	87.9817	1.46251e-11	6.97048e-10	19.1205	19.1205
SMA5	3978.41	8.41263e-13	6.27447e-11	2.03744	2.03744	2.97631e-06	8.20312e-05	1.5774	1.5774	1.98726e-15	1.62481e-13	2.21523	2.21523
SMARCB1	36881.6	2.96996e-10	1.47674e-08	0.108744	-9.19589	0.845474	0.993902	0.969833	-1.03111	1.34744e-09	4.71025e-08	0.182047	-5.4931
SMS	461151	2.14488e-21	3.77596e-19	2.13881	2.13881	1.41297e-19	3.03416e-17	2.07453	2.07453	1.50933e-32	6.14453e-30	2.53584	2.53584
SMTNL2	2953.97	3.75116e-10	1.84174e-08	0.459975	-2.17403	8.18698e-15	1.01899e-12	0.350818	-2.85048	0.0675623	0.2219	0.819077	-1.22089
SNX25	24412.7	8.36001e-30	3.20319e-27	2.42347	2.42347	1.90933e-21	5.04192e-19	1.79945	1.79945	5.21791e-32	2.03927e-29	2.66632	2.66632
SP8	2133	9.84596e-10	4.59188e-08	0.302724	-3.30334	9.06205e-05	0.00162418	0.498856	-2.00459	1.8168e-06	3.56447e-05	0.422108	-2.36906
SPRY1	4234	7.52954e-12	4.87201e-10	2.16822	2.16822	9.25975e-10	5.3063e-08	1.97063	1.97063	5.48781e-06	9.60907e-05	1.62272	1.62272
SPRY3	7515	9.18764e-06	0.000194724	0.230487	-4.33865	6.47747e-05	0.00122651	3.70047	3.70047	0.0016576	0.0127927	0.404491	-2.47225
SRGAP1	20072	3.82744e-20	6.03161e-18	3.59203	3.59203	1.67426e-12	1.52171e-10	2.66241	2.66241	1.0396e-34	4.72436e-32	5.52733	5.52733
ST6GAL1	54934.6	7.04422e-08	2.37329e-06	0.113296	-8.82646	0.00233777	0.023248	0.505574	-1.97795	7.64118e-08	2.03151e-06	0.125533	-7.96603
STEAP1	25914.5	1.14781e-05	0.000239375	2.50602	2.50602	0.696179	0.947962	0.905011	-1.10496	0.100919	0.292244	1.45701	1.45701
STEAP1B	22311.5	8.07822e-09	3.3303e-07	2.9454	2.9454	0.789212	0.979641	0.942306	-1.06123	5.17548e-07	1.1638e-05	2.59231	2.59231
STMN3	48998.2	2.72149e-05	0.000509882	0.317495	-3.14965	0.00223984	0.0224225	0.488203	-2.04833	0.414763	0.680168	0.850988	-1.1751
STRADB	55697.5	2.36837e-06	5.75626e-05	2.67119	2.67119	0.0601357	0.263856	1.5354	1.5354	0.0491195	0.176962	1.56379	1.56379
STX3	19559.1	7.52544e-23	1.47055e-20	0.428118	-2.33581	6.20561e-10	3.68583e-08	0.634768	-1.57538	6.78413e-14	4.61912e-12	0.561198	-1.7819
SULT1A1	5103.76	9.10212e-06	0.000193121	0.383744	-2.6059	0.485105	0.842999	0.864287	-1.15702	5.36773e-29	1.6137e-26	0.0291125	-34.3495
SUSD5	29038	2.5977e-07	7.74986e-06	2.98348	2.98348	8.95672e-10	5.16293e-08	3.62173	3.62173	3.54957e-08	9.98015e-07	3.20133	3.20133
SYBU	7997.04	1.77882e-18	2.41388e-16	82.4604	82.4604	6.26796e-08	2.58401e-06	15.5938	15.5938	7.62305e-13	4.514e-11	38.7132	38.7132
SYNPO2	15729	2.0842e-12	1.4703e-10	106.205	106.205	9.998e-07	3.06705e-05	6.36898	6.36898	7.39037e-13	4.38952e-11	146.316	146.316
TACR1	3058.99	2.50299e-08	9.24594e-07	15.6743	15.6743	0.621849	0.915554	1.18403	1.18403	1.2289e-10	5.03433e-09	41.0643	41.0643
TAGLN	1642	3.73206e-05	0.000665403	2.06234	2.06234	2.42743e-05	0.000521257	2.0905	2.0905	6.27695e-09	2.00519e-07	2.82164	2.82164
TAGLN2	81208.9	1.00589e-10	5.35587e-09	0.371478	-2.69195	0.103551	0.380068	0.824443	-1.21294	1.0373e-10	4.27633e-09	0.371893	-2.68895
TANC2	95572	1.48769e-17	1.81693e-15	0.183739	-5.44249	9.17898e-05	0.00164105	0.547187	-1.82753	1.86074e-12	1.01566e-10	0.289461	-3.4547
TBX5	22636.4	2.05752e-10	1.04161e-08	0.370718	-2.69747	1.88371e-10	1.22698e-08	0.369782	-2.70429	2.46645e-10	9.73675e-09	0.375572	-2.6626
TCF15	1669	1.90063e-08	7.18545e-07	0.254376	-3.9312	5.08119e-09	2.61294e-07	0.237268	-4.21465	7.36272e-09	2.30569e-07	0.24617	-4.06223
TGFB1I1	4439.02	2.44078e-27	7.014e-25	0.20847	-4.79684	0.0159928	0.102937	1.37954	1.37954	1.81062e-15	1.49921e-13	0.329957	-3.03069
TGFB3	12242	1.12546e-12	8.17566e-11	4.01235	4.01235	9.20754e-08	3.67193e-06	2.87754	2.87754	4.60973e-17	4.54943e-15	5.08777	5.08777
TGFBR2	9573.97	1.0847e-19	1.5937e-17	0.389221	-2.56923	2.97133e-15	4.06033e-13	0.446761	-2.23833	3.60761e-32	1.4387e-29	0.272507	-3.66963
THBS1	3174	2.37309e-12	1.64442e-10	20.6486	20.6486	3.85349e-15	5.15761e-13	29.3937	29.3937	4.77739e-19	5.7273e-17	50.2035	50.2035
THBS3	5062	2.27099e-08	8.46898e-07	2.00863	2.00863	3.67755e-07	1.27417e-05	1.86592	1.86592	5.36713e-17	5.21787e-15	2.87161	2.87161
THRB	4643.02	1.27442e-08	5.03099e-07	0.0154901	-64.5572	0.00224914	0.022497	0.114731	-8.71603	1.96719e-08	5.70339e-07	0.0158392	-63.1344
TIFA	14049	5.08789e-24	1.15447e-21	2.09256	2.09256	0.0236809	0.137809	0.853317	-1.1719	0.00112694	0.00935491	1.26122	1.26122
TIMP1	15652	3.33857e-07	9.72265e-06	0.221385	-4.51702	0.433954	0.809027	0.865199	-1.1558	2.43312e-06	4.61159e-05	0.281522	-3.55212
TLE1	16747.1	3.50624e-118	2.28385e-114	25.4242	25.4242	5.46017e-94	3.55658e-90	12.5507	12.5507	1.28828e-117	6.29355e-114	24.9649	24.9649
TMC1	2654	1.14132e-13	9.49043e-12	0.190702	-5.24378	0.0555755	0.250607	0.783877	-1.27571	5.13369e-08	1.39913e-06	0.398893	-2.50694
TMC5	4801.6	5.6038e-05	0.000940755	2.19133	2.19133	6.52911e-18	1.17051e-15	5.70566	5.70566	2.68269e-10	1.05266e-08	3.53801	3.53801
TMC7	4991.68	1.19008e-05	0.000247398	2.18159	2.18159	0.000424058	0.00583147	1.8613	1.8613	6.4286e-06	0.000110875	2.23977	2.23977
TMEM117	7019	6.57026e-09	2.73752e-07	2.0686	2.0686	2.55004e-05	0.000543556	1.42593	1.42593	9.2165e-09	2.82288e-07	2.02792	2.02792
TMEM144	11516	1.49597e-06	3.81132e-05	2.88018	2.88018	4.37582e-06	0.000115551	2.25174	2.25174	1.00392e-06	2.10942e-05	3.21352	3.21352
TMEM145	5996	1.00847e-08	4.04652e-07	3.28441	3.28441	8.09626e-11	5.53178e-09	3.82087	3.82087	1.02752e-16	9.42662e-15	5.42719	5.42719
TMEM2	31981.6	4.16503e-08	1.46911e-06	0.277935	-3.59796	0.00164313	0.017406	0.529261	-1.88943	6.4811e-05	0.000852494	0.430342	-2.32374
TMEM62	18618	4.50385e-12	2.9733e-10	2.49452	2.49452	0.67086	0.938589	1.06406	1.06406	0.00170693	0.0130702	1.53875	1.53875
TMSB15A	23069.2	1.66523e-09	7.56751e-08	0.364994	-2.73977	2.10452e-06	5.98608e-05	0.488241	-2.04817	1.0097e-06	2.11793e-05	0.474041	-2.10952
TNFRSF19	16773	1.1458e-25	2.98534e-23	2.96667	2.96667	3.50827e-06	9.49516e-05	1.62426	1.62426	2.88073e-11	1.31524e-09	1.99231	1.99231
TNFSF4	1523	2.9054e-05	0.000538146	9.93065	9.93065	8.94067e-05	0.00160726	5.62708	5.62708	1.43393e-05	0.000225789	15.2929	15.2929
TOX	6657	2.24243e-14	2.08614e-12	0.166765	-5.99645	3.99169e-32	2.68971e-29	0.048341	-20.6864	6.03761e-16	5.2436e-14	0.149464	-6.69055
TOX2	3934	1.11492e-07	3.58922e-06	0.425517	-2.35008	0.000342676	0.00493822	0.566693	-1.76462	6.79289e-05	0.000883754	0.52781	-1.89462
TPBGL	1454	8.92939e-09	3.63519e-07	3.77843	3.77843	0.000705705	0.0088512	2.10656	2.10656	3.50392e-10	1.35316e-08	4.21968	4.21968
TRAF1	3829	7.95315e-08	2.65663e-06	2.30831	2.30831	6.98947e-05	0.00130326	1.83221	1.83221	1.13768e-13	7.61346e-12	3.39504	3.39504
TRIM38	9287.12	7.16538e-28	2.25837e-25	0.00330278	-302.775	0.172561	0.518453	0.586232	-1.70581	3.41614e-23	5.85568e-21	0.00696132	-143.651
TRPC3	1330	2.98458e-07	8.74388e-06	3.92417	3.92417	0.0792265	0.31816	1.66212	1.66212	0.0492044	0.17717	1.67766	1.67766
TSLP	1389	8.17798e-06	0.000175804	0.160188	-6.24266	0.234385	0.6093	0.778524	-1.28448	1.75625e-05	0.000270897	0.184648	-5.41571
TWIST1	14042	5.0018e-15	5.03815e-13	2.22381	2.22381	0.889045	1	0.983956	-1.01631	7.73384e-12	3.85528e-10	2.02504	2.02504
UBE2E3	145347	6.45934e-24	1.43434e-21	0.306638	-3.26118	2.88821e-12	2.50838e-10	0.502298	-1.99085	1.4602e-25	3.13557e-23	0.282815	-3.53588
UBE2E4P	20718.3	2.05219e-56	2.50636e-53	0.321727	-3.10822	7.38148e-19	1.49262e-16	0.554137	-1.80461	4.69817e-53	4.17304e-50	0.335837	-2.97763
UGDH	69805.2	2.39424e-11	1.40536e-09	2.3901	2.3901	0.162047	0.499456	1.22226	1.22226	8.9117e-08	2.32812e-06	2.03468	2.03468
UGP2	186264	6.4044e-17	7.4493e-15	3.14824	3.14824	0.000269604	0.0040469	1.72818	1.72818	1.73822e-19	2.12291e-17	3.41224	3.41224
UNC5B	5322.01	1.31914e-08	5.15548e-07	3.09713	3.09713	0.000228011	0.00351108	1.74126	1.74126	1.33459e-11	6.40286e-10	5.32655	5.32655
UNC5C	11780	3.28207e-37	1.94348e-34	26.8467	26.8467	1.29299e-14	1.55008e-12	4.97814	4.97814	2.21097e-38	1.16769e-35	28.6313	28.6313
USO1	145760	6.96622e-08	2.35107e-06	2.06698	2.06698	0.0300554	0.163825	1.3678	1.3678	0.00408109	0.0265475	1.50296	1.50296
USP2	7013	2.0673e-05	0.000398394	2.04137	2.04137	0.0657636	0.281632	1.3684	1.3684	0.0938504	0.278544	1.33569	1.33569
VDR	4078	4.28222e-21	7.27642e-19	7.08794	7.08794	7.57314e-11	5.26643e-09	3.17201	3.17201	8.77234e-18	9.31632e-16	5.54741	5.54741
VLDLR	8691.69	5.01361e-24	1.1526e-21	0.356464	-2.80533	1.82924e-07	6.79564e-06	1.63262	1.63262	0.403787	0.669813	1.08626	1.08626
VSTM4	5216	1.10625e-11	6.95086e-10	3.85763	3.85763	5.79027e-08	2.40229e-06	2.76853	2.76853	7.38033e-15	5.58988e-13	4.91751	4.91751
VWA5A	3239	1.55952e-06	3.94239e-05	2.2055	2.2055	1.80353e-07	6.71292e-06	2.34205	2.34205	6.18063e-17	5.94954e-15	4.67844	4.67844
WDR17	21122.1	6.13744e-07	1.67972e-05	2.34764	2.34764	4.22166e-07	1.43971e-05	2.36514	2.36514	8.36685e-06	0.000140824	2.14094	2.14094
ZBTB18	28274.8	2.1591e-15	2.28059e-13	0.495419	-2.01849	3.72526e-17	6.27545e-15	0.473186	-2.11333	7.08413e-09	2.22916e-07	0.606172	-1.6497
ZNF429	3983.95	1.09468e-05	0.000229027	2.47479	2.47479	2.03191e-05	0.000448144	2.2232	2.2232	2.46395e-06	4.661e-05	3.37567	3.37567
ZNF440	4701.68	1.97556e-10	1.00271e-08	4.07857	4.07857	0.988351	1	1.03685	1.03685	2.147e-08	6.19714e-07	3.44617	3.44617
ZNF441	5166.29	8.1912e-09	3.36269e-07	2.23364	2.23364	5.80253e-06	0.00014764	1.86207	1.86207	4.66865e-20	5.92404e-18	3.82456	3.82456
ZNF488	5138	3.78936e-08	1.34878e-06	3.00707	3.00707	0.000485509	0.00649493	1.42874	1.42874	7.46396e-07	1.63147e-05	2.20303	2.20303
ZNF681	9730.89	6.19431e-15	6.17566e-13	2.53669	2.53669	1.92038e-18	3.67904e-16	2.92497	2.92497	8.9225e-17	8.26325e-15	2.73833	2.73833
ZNF711	99334	2.84807e-11	1.66132e-09	0.229238	-4.36228	2.98975e-07	1.0603e-05	0.399353	-2.50405	9.9736e-10	3.55646e-08	0.29305	-3.41238
ZNF730	1515.85	7.15002e-10	3.39123e-08	4.82924	4.82924	4.40898e-15	5.78228e-13	12.2973	12.2973	1.01701e-15	8.60317e-14	14.0286	14.0286
ZNF788	6270.7	6.18494e-06	0.000138126	16.9128	16.9128	0.0148141	0.0975345	5.0234	5.0234	7.00068e-09	2.21002e-07	35.6367	35.6367
