# Supplementary material for: Chromatin-Remodeling Complex SWI/SNF Controls Multidrug Resistance by Transcriptionally Regulating the Drug Efflux Pump ABCB1
Source: Oxford University Press journal article supplement (doi:10.1158/0008-5472.can-16-0716), 2016-08-08
Supplement: 00085472can160716-sup-163341_1_supp_0_7b3f5d.xlsx [file 00085472can160716-sup-163341_1_supp_0_7b3f5d.xlsx]

## Sheet: All Genes
Gene symbol	Total reads	P-value (SMARCB1_Null vs. Wildtype)	FDR step up (SMARCB1_Null vs. Wildtype)	Ratio (SMARCB1_Null vs. Wildtype)	Fold change (SMARCB1_Null vs. Wildtype)	P-value (SMARCA4_Null vs. Wildtype)	FDR step up (SMARCA4_Null vs. Wildtype)	Ratio (SMARCA4_Null vs. Wildtype)	Fold change (SMARCA4_Null vs. Wildtype)
A1BG	2840.67	0.370112	1	0.923745	-1.08255	0.33924	1	1.08654	1.08654
A1BG-AS1	1600.85	0.813933	1	0.806993	-1.23917	0.840525	1	0.833808	-1.19932
A1CF	26	0.315977	1	0.44581	-2.24311	0.747141	1	0.632174	-1.58184
A2M	54.7481	0.951851	1	1.05373	1.05373	0.465623	1	1.42921	1.42921
A2M-AS1	37	0.505705	1	1.32192	1.32192	0.950295	1	0.897208	-1.11457
A2ML1	142	0.934762	1	1.80482	1.80482	0.0660779	0.603465	20.0384	20.0384
A4GALT	7585	0.710657	1	0.802613	-1.24593	0.0105696	0.16509	3.18687	3.18687
A4GNT	51	0.781943	1	1.91785	1.91785	0.60325	1	2.3185	2.3185
AAAS	38383.8	0.79361	1	1.04713	1.04713	0.817204	1	0.959269	-1.04246
AACS	17350	0.0437499	0.407859	0.468566	-2.13417	0.465002	1	0.791678	-1.26314
AACSP1	422	0.732588	1	1.95759	1.95759	0.790913	1	1.70625	1.70625
AADAT	12213.9	0.0640333	0.527414	2.02593	2.02593	0.689387	1	1.18449	1.18449
AAED1	7213	0.865344	1	1.06044	1.06044	0.561666	1	1.21475	1.21475
AAGAB	54321.6	0.490978	1	1.15301	1.15301	0.517047	1	1.14361	1.14361
AAK1	31711	0.88167	1	1.10926	1.10926	0.689971	1	1.307	1.307
AAMDC	5087	0.647909	1	0.881251	-1.13475	0.219901	1	1.35834	1.35834
AAMP	52847	0.989624	1	0.998092	-1.00191	0.415985	1	0.884068	-1.13113
AANAT	56	0.711862	1	1.12452	1.12452	0.208783	1	1.51818	1.51818
AAR2	25582.3	0.668667	1	1.11835	1.11835	0.744196	1	0.914242	-1.0938
AARS	107852	0.388495	1	1.13861	1.13861	0.0239962	0.301535	1.38455	1.38455
AARS2	21571.4	0.809033	1	1.09763	1.09763	0.858279	1	1.07167	1.07167
AARSD1	12724.5	0.863495	1	1.0462	1.0462	0.826996	1	0.942765	-1.06071
AASDH	8453.99	0.914552	1	0.942043	-1.06152	0.998373	1	0.998877	-1.00112
AASDHPPT	54980.8	0.625833	1	1.09133	1.09133	0.77504	1	0.948342	-1.05447
AASS	60322	0.90622	1	1.02907	1.02907	0.338132	1	0.778184	-1.28504
AATF	55011	0.997649	1	0.999544	-1.00046	0.179536	1	0.80238	-1.24629
AATK	7971.18	0.825019	1	1.15614	1.15614	0.899255	1	1.08785	1.08785
AATK-AS1	35	0.291722	1	1.76112	1.76112	0.498097	1	0.78765	-1.2696
ABAT	7274.04	0.46958	1	1.69223	1.69223	0.969884	1	1.03105	1.03105
ABCA1	4065	0.477756	1	0.236917	-4.22088	0.725468	1	1.49825	1.49825
ABCA10	41.0677	0.851525	1	1.46952	1.46952	0.526341	1	2.00783	2.00783
ABCA11P	3793.56	0.33351	1	1.68867	1.68867	0.566463	1	1.38135	1.38135
ABCA12	34	0.118676	0.760453	0.127436	-7.84708	0.319363	1	0.177138	-5.64531
ABCA13	677	0.00271747	0.0487013	0.00929476	-107.587	0.000231488	0.00729963	0.0601508	-16.6249
ABCA17P	180.012	0.039665	0.380983	1.52759	1.52759	0.00859939	0.141405	1.6898	1.6898
ABCA2	43087.1	0.790111	1	0.908929	-1.1002	0.867811	1	0.942564	-1.06094
ABCA3	65485	0.346636	1	1.27839	1.27839	0.60383	1	1.14881	1.14881
ABCA5	5042.94	0.632532	1	1.80961	1.80961	0.522127	1	2.16107	2.16107
ABCA7	7674	0.0278296	0.297554	0.87014	-1.14924	0.00180825	0.0406392	1.20791	1.20791
ABCA8	16.7642	0.0772889	0.596257	16.283	16.283	0.356473	1	0.125964	-7.93878
ABCB1	39890.6	6.9915e-08	4.13285e-06	5.85794	5.85794	0.269483	1	0.575051	-1.73898
ABCB10	35166	0.700583	1	1.10526	1.10526	0.738671	1	0.912968	-1.09533
ABCB4	168.368	0.911611	1	1.21502	1.21502	0.495005	1	0.225652	-4.4316
ABCB5	11	0.0102241	0.14006	0.457773	-2.18449	0.132114	0.901567	0.760669	-1.31463
ABCB6	1498	0.991893	1	0.992861	-1.00719	0.711675	1	0.781399	-1.27976
ABCB7	31903.2	0.81658	1	1.04597	1.04597	0.554678	1	1.1191	1.1191
ABCB8	14264	0.898439	1	0.954716	-1.04743	0.844745	1	1.0719	1.0719
ABCB9	4379	0.702409	1	0.934308	-1.07031	0.809157	1	1.04264	1.04264
ABCC1	51597	0.637098	1	0.871065	-1.14802	0.918701	1	0.971381	-1.02946
ABCC10	9215.62	0.000135828	0.00406026	1.05975	1.05975	5.09351e-18	7.67533e-16	1.17299	1.17299
ABCC11	86	0.81508	1	0.96643	-1.03474	0.342267	1	1.51432	1.51432
ABCC2	263	0.822701	1	1.03305	1.03305	0.678971	1	1.0604	1.0604
ABCC3	15	0.474185	1	1.45196	1.45196	0.485367	1	1.6312	1.6312
ABCC4	31159.1	0.366361	1	1.42349	1.42349	0.147002	0.950659	1.72647	1.72647
ABCC5	29569	0.457131	1	1.32253	1.32253	0.972262	1	1.01397	1.01397
ABCC6	775.896	4.14569e-05	0.0014353	0.351358	-2.8461	0.00164043	0.0374631	1.97801	1.97801
ABCC6P1	10.7668	0.19988	0.974693	0.245938	-4.06606	0.823447	1	0.765232	-1.30679
ABCC8	971.001	0.934206	1	0.823937	-1.21369	0.625483	1	2.48939	2.48939
ABCC9	27	0.116171	0.753063	21.823	21.823	0.439378	1	0.144973	-6.89786
ABCD1	6154	0.82872	1	0.920374	-1.08651	0.316497	1	1.41937	1.41937
ABCD2	519	9.63662e-25	2.24253e-22	21.4874	21.4874	0.325642	1	1.34252	1.34252
ABCD3	35759	0.793578	1	1.07078	1.07078	0.825508	1	0.942248	-1.06129
ABCD4	14075.9	0.596392	1	0.829311	-1.20582	0.768888	1	0.903492	-1.10682
ABCE1	111738	0.0457224	0.418814	1.36329	1.36329	0.974985	1	1.00523	1.00523
ABCF1	68435.3	0.722458	1	1.18369	1.18369	0.931136	1	0.95773	-1.04414
ABCF2	60463.3	0.215855	1	1.32559	1.32559	0.834644	1	0.949876	-1.05277
ABCF3	19375	0.241357	1	1.41569	1.41569	0.720854	1	1.11818	1.11818
ABCG1	25	0.525507	1	0.772124	-1.29513	0.331177	1	0.707116	-1.41419
ABCG2	1632	0.31859	1	20.6897	20.6897	0.45032	1	10.4514	10.4514
ABCG4	1109	0.798773	1	1.55016	1.55016	0.656302	1	2.06774	2.06774
ABCG5	15	0.0364187	0.359346	0.365678	-2.73464	0.920726	1	1.01884	1.01884
ABHD1	266	0.981728	1	0.954976	-1.04715	0.882362	1	1.30709	1.30709
ABHD10	20932.9	0.0971818	0.685305	1.51816	1.51816	0.901278	1	1.03453	1.03453
ABHD11	5058.01	0.813236	1	0.902886	-1.10756	0.714188	1	1.16062	1.16062
ABHD11-AS1	10	0.921995	1	1.93636	1.93636	0.302132	1	6.20382	6.20382
ABHD12	23337.2	0.785484	1	0.931206	-1.07388	0.916849	1	0.973328	-1.0274
ABHD12B	368	0.77513	1	0.620881	-1.61061	0.718258	1	0.531695	-1.88078
ABHD13	11914	0.965563	1	0.977821	-1.02268	0.683003	1	0.799573	-1.25067
ABHD14A	4813.23	0.0298182	0.312374	1.42318	1.42318	0.406551	1	1.15118	1.15118
ABHD14A-ACY1	613.874	0.988857	1	0.981202	-1.01916	0.825618	1	0.722319	-1.38443
ABHD14B	27930.4	0.263718	1	1.32428	1.32428	0.166249	1	1.40964	1.40964
ABHD15	16260	0.345124	1	1.41263	1.41263	0.625305	1	1.2032	1.2032
ABHD16A	11625	0.983578	1	1.0176	1.0176	0.983497	1	1.01756	1.01756
ABHD16B	3177	0.893705	1	1.09014	1.09014	0.557851	1	1.42819	1.42819
ABHD17A	28148.5	0.722906	1	1.07166	1.07166	0.599797	1	0.898474	-1.113
ABHD17B	31083.2	0.35072	1	1.27974	1.27974	0.695044	1	1.1129	1.1129
ABHD17C	39660	0.595925	1	1.1026	1.1026	0.857218	1	1.03423	1.03423
ABHD2	77323.1	0.904224	1	0.968083	-1.03297	0.736403	1	1.09201	1.09201
ABHD3	7555	0.563387	1	0.786053	-1.27218	0.518766	1	0.762504	-1.31147
ABHD4	5298	0.309848	1	1.53319	1.53319	0.432164	1	1.40003	1.40003
ABHD5	10787	0.882788	1	1.08859	1.08859	0.874552	1	1.09505	1.09505
ABHD6	4393	0.802289	1	1.17555	1.17555	0.474934	1	1.54552	1.54552
ABHD8	7443	0.85512	1	1.08312	1.08312	0.756604	1	1.14315	1.14315
ABI1	30566	0.0991141	0.693346	1.60625	1.60625	0.591942	1	1.17868	1.17868
ABI2	78625.8	0.971941	1	1.00877	1.00877	0.552572	1	1.15349	1.15349
ABI3	42	0.960418	1	1.04825	1.04825	0.815338	1	2.17461	2.17461
ABI3BP	109	0.384302	1	1.17075	1.17075	0.189693	1	0.794947	-1.25795
ABL1	10853	0.368233	1	1.79788	1.79788	0.45865	1	1.6348	1.6348
ABL2	46920.3	0.244786	1	1.63939	1.63939	0.753497	1	1.15452	1.15452
ABLIM1	69773.8	0.544095	1	1.18463	1.18463	0.917481	1	1.03036	1.03036
ABLIM2	274	0.920684	1	0.966832	-1.03431	0.908191	1	0.95692	-1.04502
ABLIM3	184	3.48917e-05	0.00124553	4.22395	4.22395	0.00442673	0.0838979	2.66525	2.66525
ABR	38510.7	0.772226	1	1.1093	1.1093	0.328234	1	1.39503	1.39503
ABRA	37	0.523773	1	11.8122	11.8122	0.379611	1	0.370628	-2.69812
ABRACL	14086	0.374643	1	0.84393	-1.18493	0.0728172	0.645143	0.696235	-1.4363
ABT1	20201	0.769909	1	1.08027	1.08027	0.591962	1	0.860787	-1.16173
ABTB1	1284	0.897151	1	0.861059	-1.16136	0.61257	1	1.65685	1.65685
ABTB2	5256	0.358629	1	0.409927	-2.43946	0.825859	1	1.17004	1.17004
ACAA1	18660.1	0.742672	1	0.917346	-1.0901	0.681643	1	0.89725	-1.11452
ACAA2	57983	0.902539	1	1.01837	1.01837	0.924146	1	1.01427	1.01427
ACACA	160533	0.579272	1	1.13345	1.13345	0.21202	1	1.31359	1.31359
ACACB	8145	0.995092	1	1.00555	1.00555	0.828913	1	1.2031	1.2031
ACAD10	13863.9	0.825305	1	1.09618	1.09618	0.918986	1	1.04381	1.04381
ACAD11	10581	0.453658	1	1.46262	1.46262	0.294369	1	1.67864	1.67864
ACAD8	12166	0.128279	0.790251	1.39859	1.39859	0.413338	1	1.20472	1.20472
ACAD9	31104.6	0.964275	1	1.01079	1.01079	0.834613	1	0.950457	-1.05213
ACADL	183	0.890498	1	0.702622	-1.42324	0.693333	1	0.203486	-4.91433
ACADM	28128.1	0.762647	1	1.0604	1.0604	0.998295	1	1.00043	1.00043
ACADS	10845	0.827555	1	0.927787	-1.07783	0.994782	1	0.997796	-1.00221
ACADSB	34812	0.370204	1	1.34992	1.34992	0.81992	1	1.08341	1.08341
ACADVL	35671.4	0.499867	1	1.16619	1.16619	0.123223	0.869276	1.40123	1.40123
ACAN	150	0.413462	1	0.835776	-1.19649	0.178947	1	0.739044	-1.3531
ACAP1	89	0.0494103	0.442299	34.7174	34.7174	0.0394124	0.43026	55.2348	55.2348
ACAP2	43425	0.115632	0.750363	1.68724	1.68724	0.692936	1	1.15276	1.15276
ACAP3	19712	0.982705	1	1.00761	1.00761	0.880207	1	0.947827	-1.05504
ACAT1	63145	0.150798	0.856224	1.242	1.242	0.396379	1	1.13937	1.13937
ACAT2	33118.5	0.276773	1	0.818208	-1.22218	0.487793	1	1.12525	1.12525
ACBD3	29345	0.476603	1	1.04333	1.04333	0.0500071	0.50699	1.12237	1.12237
ACBD4	6514	0.78691	1	0.861847	-1.1603	0.819776	1	1.12434	1.12434
ACBD5	18782	3.90412e-05	0.00136627	1.09347	1.09347	4.61905e-10	3.67605e-08	1.14495	1.14495
ACBD6	20550	0.424122	1	1.18213	1.18213	0.842265	1	1.04384	1.04384
ACBD7	7562.7	0.040556	0.387718	0.310977	-3.21567	0.041757	0.448138	0.314866	-3.17596
ACCS	6882.01	0.331748	1	1.64867	1.64867	0.177592	1	1.96071	1.96071
ACD	14368.7	0.590756	1	0.846624	-1.18116	0.846266	1	0.943321	-1.06008
ACE	3534.01	0.813599	1	0.746127	-1.34025	0.255241	1	2.92789	2.92789
ACE2	28	0.249565	1	0.63628	-1.57163	0.424085	1	0.715012	-1.39858
ACER2	805	0.583564	1	1.82406	1.82406	0.475911	1	2.13274	2.13274
ACER3	30974.2	0.914943	1	1.04041	1.04041	0.794646	1	0.904932	-1.10506
ACHE	2643	0.977033	1	1.02648	1.02648	0.758	1	1.30229	1.30229
ACIN1	131226	0.713353	1	0.943235	-1.06018	0.480574	1	0.892396	-1.12058
ACKR2	61	0.734974	1	0.881693	-1.13418	0.200183	1	1.33724	1.33724
ACKR3	320	0.6098	1	0.210622	-4.74784	0.986021	1	0.968662	-1.03235
ACKR4	602	0.931291	1	0.85686	-1.16705	0.85336	1	1.3467	1.3467
ACLY	208111	0.676447	1	0.950203	-1.05241	0.115626	0.841179	1.19965	1.19965
ACMSD	25.1912	0.000726185	0.0166254	0.275728	-3.62676	0.0093217	0.149799	1.70374	1.70374
ACN9	12345	0.187732	0.948057	1.47105	1.47105	0.831423	1	0.933184	-1.0716
ACO1	36357.7	0.970897	1	0.990821	-1.00926	0.738269	1	0.917467	-1.08996
ACO2	96217.2	0.0102741	0.140431	1.44764	1.44764	0.00970425	0.155403	1.45147	1.45147
ACOT11	1227.3	2.85137e-12	2.8802e-10	1.49298	1.49298	6.68018e-43	3.50881e-40	2.30589	2.30589
ACOT12	33	0.267099	1	3.54642	3.54642	0.170155	1	7.22057	7.22057
ACOT13	21420.8	0.333091	1	1.42795	1.42795	0.481843	1	1.30202	1.30202
ACOT2	26.7841	0.197398	0.96815	2.1552	2.1552	0.472325	1	1.44458	1.44458
ACOT7	48796.4	0.0637751	0.526467	0.715434	-1.39775	0.199178	1	0.798702	-1.25203
ACOT8	5350.01	0.872681	1	0.941293	-1.06237	0.8638	1	0.937223	-1.06698
ACOT9	20103	0.649918	1	1.06595	1.06595	0.193426	1	1.19514	1.19514
ACOX1	53579.7	0.183068	0.936168	1.56467	1.56467	0.124407	0.871274	1.66611	1.66611
ACOX3	4587.02	0.674785	1	1.28863	1.28863	0.811473	1	1.15904	1.15904
ACOXL	31	0.925054	1	1.63999	1.63999	0.294653	1	2.5256	2.5256
ACP1	63773.2	0.848371	1	0.974194	-1.02649	0.306685	1	0.865761	-1.15505
ACP2	10827	0.378659	1	1.40494	1.40494	0.521527	1	1.28689	1.28689
ACP5	64	0.514725	1	0.889599	-1.1241	0.448807	1	0.859971	-1.16283
ACP6	4659	0.885256	1	0.927385	-1.0783	0.613714	1	1.27689	1.27689
ACPT	36	0.727931	1	0.788268	-1.2686	0.776586	1	0.7517	-1.33032
ACR	19	0.160484	0.880437	5.88272	5.88272	0.237194	1	3.57458	3.57458
ACRBP	171	0.98463	1	1.05011	1.05011	0.891304	1	0.7144	-1.39978
ACRC	2369	0.517347	1	1.84904	1.84904	0.867404	1	1.18917	1.18917
ACRV1	217	8.87191e-09	6.06324e-07	0.711438	-1.4056	1.86416e-13	2.07701e-11	0.61611	-1.62309
ACSBG1	337	0.763019	1	1.03375	1.03375	0.252204	1	1.15093	1.15093
ACSBG2	234	0.591362	1	1.14877	1.14877	0.756451	1	1.07385	1.07385
ACSF2	2846.05	0.790599	1	1.23228	1.23228	0.667097	1	1.39041	1.39041
ACSF3	10210	0.57093	1	1.20384	1.20384	0.947338	1	0.977866	-1.02264
ACSL1	64321.3	0.000530778	0.0129414	2.26003	2.26003	0.110058	0.819819	1.49826	1.49826
ACSL3	40290.1	0.0724471	0.569417	1.61689	1.61689	0.700701	1	1.11767	1.11767
ACSL4	42581	0.133263	0.806298	1.61514	1.61514	0.0327795	0.378268	1.93449	1.93449
ACSL5	77	0.665378	1	1.08631	1.08631	0.598202	1	0.734465	-1.36154
ACSL6	1509	0.951934	1	1.1281	1.1281	0.709319	1	1.94668	1.94668
ACSM3	84.9786	0.899734	1	0.675244	-1.48095	0.915609	1	0.730763	-1.36843
ACSS1	18680	0.880602	1	1.0573	1.0573	0.883218	1	0.945525	-1.05761
ACSS2	15960	0.836776	1	0.921347	-1.08537	0.184795	1	1.59369	1.59369
ACSS3	15	0.449274	1	0.302313	-3.30783	0.10257	0.787656	0.100845	-9.91623
ACTA1	10823.8	0.481028	1	99.2043	99.2043	0.700947	1	0.202547	-4.93713
ACTA2	8690.39	1.1538e-05	0.000470321	14.044	14.044	0.550762	1	0.560298	-1.78477
ACTA2-AS1	272.091	0.252604	1	5.32622	5.32622	0.593063	1	0.223856	-4.46716
ACTB	1.43439e+06	0.146518	0.844008	0.957153	-1.04477	3.61875e-12	3.50143e-10	1.21878	1.21878
ACTBL2	94.1746	0.646536	1	43.6322	43.6322	0.60616	1	0.0272295	-36.7249
ACTC1	2274.59	0.176275	0.923932	40.2371	40.2371	0.813051	1	0.25173	-3.9725
ACTG1	1.14515e+06	0.0136798	0.174404	1.09708	1.09708	3.6002e-32	1.29777e-29	1.51248	1.51248
ACTG1P4	131.96	0.9978	1	1.03593	1.03593	0.541995	1	1.25714	1.25714
ACTG2	3417.32	0.001661	0.0328342	0.0617757	-16.1876	0.00564083	0.101172	0.0282923	-35.3454
ACTL10	218	0.263214	1	1.15103	1.15103	0.0026659	0.0551292	0.687487	-1.45457
ACTL6A	43165.1	0.208475	0.99239	0.808716	-1.23653	0.203427	1	0.806675	-1.23966
ACTL6B	18	0.336789	1	1.63633	1.63633	0.322721	1	2.52243	2.52243
ACTL8	1655	0.492721	1	1.74443	1.74443	0.720463	1	0.696925	-1.43487
ACTN1	67039.4	0.980996	1	0.995205	-1.00482	0.191969	1	1.28194	1.28194
ACTN2	2618.2	0.376755	1	3.35534	3.35534	0.535394	1	2.42409	2.42409
ACTN3	1594	0.211226	0.998241	33.4201	33.4201	0.995406	1	1.0224	1.0224
ACTN4	106488	0.0668494	0.541725	0.745109	-1.34209	0.630669	1	0.929918	-1.07536
ACTR10	24003	0.750412	1	1.08463	1.08463	0.882856	1	0.961975	-1.03953
ACTR1A	63080	0.734799	1	1.06087	1.06087	0.77639	1	1.05092	1.05092
ACTR1B	22395	0.794178	1	0.935155	-1.06934	0.77761	1	0.929892	-1.07539
ACTR2	181890	3.22164e-21	6.04353e-19	1.0741	1.0741	1.10683e-60	9.68948e-58	1.13414	1.13414
ACTR3	158428	0.46054	1	0.887704	-1.1265	0.610248	1	1.08142	1.08142
ACTR3B	9925.18	0.915222	1	0.959216	-1.04252	0.900824	1	1.04883	1.04883
ACTR3BP5	42.0171	0.0702109	0.559857	1.53204	1.53204	0.0484729	0.49728	1.6204	1.6204
ACTR5	9965	0.726959	1	1.1515	1.1515	0.926735	1	1.03881	1.03881
ACTR6	16456.9	0.908519	1	1.03786	1.03786	0.997854	1	1.00088	1.00088
ACTR8	14846	0.928255	1	1.03574	1.03574	0.981	1	0.990713	-1.00937
ACTRT3	873	0.74945	1	0.642449	-1.55654	0.833217	1	1.2762	1.2762
ACVR1	9325.89	0.465651	1	1.41573	1.41573	0.691856	1	1.21554	1.21554
ACVR1B	21246.9	0.61404	1	0.822305	-1.21609	0.93375	1	0.969583	-1.03137
ACVR1C	18248	0.00618318	0.0940991	28.131	28.131	0.558925	1	0.107675	-9.28722
ACVR2A	9974.27	0.114535	0.747467	0.361679	-2.76488	0.399191	1	0.638037	-1.56731
ACVR2B	35178	0.722162	1	0.849768	-1.17679	0.719844	1	0.848505	-1.17854
ACVR2B-AS1	2347	0.866842	1	0.897909	-1.1137	0.926	1	0.942242	-1.0613
ACVRL1	15	0.125946	0.783019	10.8663	10.8663	0.398761	1	1.63827	1.63827
ACY1	8839.89	0.617331	1	0.837448	-1.1941	0.771939	1	0.904095	-1.10608
ACYP1	4030.99	0.99124	1	0.996587	-1.00342	0.876216	1	0.953182	-1.04912
ACYP2	1375	0.66283	1	0.723514	-1.38214	0.675692	1	0.733917	-1.36255
ADA	8984	0.358853	1	1.39171	1.39171	0.174112	1	1.60895	1.60895
ADAM10	54577	0.541006	1	1.16272	1.16272	0.458439	1	1.1991	1.1991
ADAM11	18933	0.134509	0.810136	1.79306	1.79306	0.510019	1	1.31422	1.31422
ADAM12	195	0.772993	1	3.09617	3.09617	0.473148	1	4.64414	4.64414
ADAM15	53212.1	0.0363671	0.359346	0.634733	-1.57547	0.699471	1	0.927449	-1.07823
ADAM17	25095	1.27353e-92	2.12842e-89	1.32703	1.32703	9.41924e-25	2.06147e-22	1.10668	1.10668
ADAM19	2708	0.958681	1	0.919882	-1.0871	0.386726	1	3.00484	3.00484
ADAM1A	7208	0.605838	1	0.938216	-1.06585	0.0963206	0.760374	0.808432	-1.23696
ADAM20	21	0.813569	1	1.04824	1.04824	0.114702	0.839441	0.31602	-3.16435
ADAM20P1	75	0.541392	1	1.30523	1.30523	0.176505	1	0.556801	-1.79597
ADAM21	49.416	0.410341	1	0.761703	-1.31285	0.471023	1	1.39227	1.39227
ADAM22	19961	0.980509	1	1.0138	1.0138	0.987498	1	0.991204	-1.00887
ADAM23	18237	0.326724	1	1.62923	1.62923	0.475553	1	1.43895	1.43895
ADAM32	97	0.303594	1	1.97917	1.97917	0.828795	1	1.06546	1.06546
ADAM7	59	0.000692139	0.0159652	865.481	865.481	1	1	1	-1
ADAM8	965	0.689505	1	1.14447	1.14447	0.638666	1	0.84456	-1.18405
ADAM9	36886.6	0.391441	1	1.27071	1.27071	0.340172	1	1.30363	1.30363
ADAMTS1	2997	0.470116	1	2.16774	2.16774	0.754845	1	1.434	1.434
ADAMTS10	1320	0.677977	1	1.80148	1.80148	0.467142	1	2.64109	2.64109
ADAMTS12	1453	0.512449	1	2.66261	2.66261	0.93457	1	0.857273	-1.16649
ADAMTS13	2078	0.872325	1	1.24535	1.24535	0.771256	1	1.46691	1.46691
ADAMTS14	25	0.182099	0.933554	3.23097	3.23097	0.806187	1	0.750857	-1.33181
ADAMTS15	873	0.0935525	0.670514	0.191757	-5.21493	0.49664	1	0.631934	-1.58244
ADAMTS16	20	0.483619	1	1.09418	1.09418	0.977206	1	1.304	1.304
ADAMTS17	2807	0.965265	1	0.948826	-1.05393	0.906656	1	0.865218	-1.15578
ADAMTS2	9574.99	0.880642	1	0.902453	-1.10809	0.616787	1	1.36374	1.36374
ADAMTS20	256	0.00130074	0.0270816	2014.18	2014.18	0.00524467	0.0950868	148.317	148.317
ADAMTS3	12006	0.0686702	0.552636	3.04921	3.04921	0.436447	1	1.68508	1.68508
ADAMTS4	65	0.0128438	0.166516	2.9358	2.9358	0.23447	1	1.71084	1.71084
ADAMTS5	732	0.00486521	0.078344	33.0743	33.0743	0.00197097	0.043551	0.00905776	-110.403
ADAMTS6	1382	0.0286929	0.30403	4.85869	4.85869	0.773716	1	1.27049	1.27049
ADAMTS7	9851.16	0.783942	1	1.16924	1.16924	0.573845	1	0.691988	-1.44511
ADAMTS7P1	20.8428	0.519213	1	1.30527	1.30527	0.897273	1	0.728105	-1.37343
ADAMTS8	136	0.530884	1	0.369022	-2.70987	0.63929	1	1.98622	1.98622
ADAMTS9	6590.27	0.380448	1	0.348277	-2.87128	0.553062	1	1.58992	1.58992
ADAMTSL1	8194.99	0.409844	1	0.528967	-1.89048	0.275361	1	0.392923	-2.54503
ADAMTSL2	11	0.542402	1	1.57377	1.57377	0.975487	1	1.17606	1.17606
ADAMTSL3	360	2.36225e-05	0.000886276	6.00104	6.00104	0.0404795	0.438925	0.872595	-1.14601
ADAMTSL4	5147	0.437159	1	2.0566	2.0566	0.212841	1	2.99067	2.99067
ADAMTSL4-AS1	55	0.997344	1	1.00253	1.00253	0.98369	1	0.949	-1.05374
ADAMTSL5	2061	0.881407	1	1.20153	1.20153	0.270097	1	3.15932	3.15932
ADAP1	8555.98	0.250118	1	1.67198	1.67198	0.671985	1	1.22342	1.22342
ADAP2	10499	0.707424	1	1.15796	1.15796	0.319824	1	1.44854	1.44854
ADAR	227574	0.118816	0.76082	1.25662	1.25662	0.194658	1	1.21107	1.21107
ADARB1	12192	0.807362	1	0.864493	-1.15675	0.78034	1	0.845763	-1.18236
ADAT1	13755.9	0.920736	1	1.04155	1.04155	0.837238	1	0.91685	-1.09069
ADAT2	12888	0.404681	1	1.61243	1.61243	0.706243	1	1.25533	1.25533
ADAT3	3214	0.98523	1	0.989857	-1.01025	0.697769	1	0.797622	-1.25373
ADCK1	6432.98	0.747352	1	1.16377	1.16377	0.98003	1	1.01224	1.01224
ADCK2	21082	0.734596	1	1.09665	1.09665	0.89126	1	1.03842	1.03842
ADCK3	24375	0.850807	1	1.05307	1.05307	0.822556	1	0.938499	-1.06553
ADCK4	12261	0.784285	1	1.04936	1.04936	0.367417	1	1.16766	1.16766
ADCK5	3217	8.19647e-06	0.000350892	0.865968	-1.15478	0.622765	1	0.984487	-1.01576
ADCY1	23157	0.052265	0.458635	4.28201	4.28201	0.302901	1	2.29928	2.29928
ADCY10	76	0.723271	1	0.868181	-1.15183	0.163951	1	0.635766	-1.5729
ADCY10P1	532.587	0.839686	1	1.12387	1.12387	0.942109	1	0.970892	-1.02998
ADCY2	38	0.353866	1	267.67	267.67	0.620461	1	12.2706	12.2706
ADCY3	45568	0.590539	1	1.16081	1.16081	0.056777	0.551103	1.63442	1.63442
ADCY5	1307	3.74234e-05	0.00131799	1.80716	1.80716	9.29185e-15	1.13127e-12	2.95687	2.95687
ADCY6	18596	0.741859	1	0.851221	-1.17478	0.834099	1	0.904114	-1.10606
ADCY7	46555.7	0.689344	1	0.883289	-1.13213	0.644082	1	1.14394	1.14394
ADCY9	42813	0.997712	1	1.00103	1.00103	0.574593	1	1.21203	1.21203
ADCYAP1	13	0.412593	1	0.226108	-4.42266	0.389413	1	0.173832	-5.75268
ADCYAP1R1	124	0.235735	1	4.50023	4.50023	0.0817861	0.691505	12.2752	12.2752
ADD1	102892	0.638913	1	0.92585	-1.08009	0.683574	1	1.06673	1.06673
ADD2	47607.2	0.247658	1	1.41168	1.41168	0.30401	1	1.36187	1.36187
ADD3	29263.9	0.526648	1	0.809848	-1.2348	0.941265	1	1.02336	1.02336
ADD3-AS1	143.64	0.85272	1	1.42989	1.42989	0.873572	1	1.3626	1.3626
ADH1A	11.6869	0.522831	1	0.677775	-1.47542	0.382824	1	1.13419	1.13419
ADH4	26	0.788478	1	0.452299	-2.21093	0.961108	1	0.616644	-1.62168
ADH5	70381	0.631658	1	0.927251	-1.07846	0.710116	1	0.943364	-1.06004
ADH6	165	0.987883	1	1.01462	1.01462	0.793599	1	1.36923	1.36923
ADHFE1	252	0.825663	1	1.20873	1.20873	0.448698	1	1.75366	1.75366
ADI1	38537	0.106068	0.719168	1.28748	1.28748	0.0141335	0.204533	0.629288	-1.5891
ADIPOR1	41322.6	0.102871	0.707511	1.37291	1.37291	0.903693	1	1.02545	1.02545
ADIPOR2	60246	0.597492	1	1.1074	1.1074	0.682074	1	1.0828	1.0828
ADK	24072.1	0.0219548	0.249064	1.79941	1.79941	0.819406	1	1.06749	1.06749
ADM	9178	0.000663782	0.0154078	5.45622	5.45622	0.00055289	0.0152389	5.57673	5.57673
ADM2	1537	0.93743	1	1.16472	1.16472	0.355936	1	4.30443	4.30443
ADM5	5953	0.792354	1	1.12747	1.12747	0.514654	1	0.715518	-1.39759
ADNP	116123	0.193196	0.960015	0.779889	-1.28223	0.279302	1	0.815337	-1.22649
ADNP2	47601	0.377524	1	0.787156	-1.2704	0.425768	1	0.806936	-1.23926
ADO	31163	0.607517	1	0.86657	-1.15397	0.828723	1	0.942719	-1.06076
ADORA1	437	0.907541	1	1.3205	1.3205	0.674736	1	2.46007	2.46007
ADORA2A	1636.13	0.384404	1	2.63443	2.63443	0.98487	1	0.974747	-1.02591
ADORA2A-AS1	213.591	0.634931	1	0.890431	-1.12305	0.150483	0.962391	0.701994	-1.42451
ADORA2B	6534	0.129545	0.794116	1.95256	1.95256	0.395957	1	1.48316	1.48316
ADPGK	56586.7	0.61504	1	1.09391	1.09391	0.920002	1	0.98176	-1.01858
ADPGK-AS1	347.703	0.939944	1	0.865709	-1.15512	0.936892	1	1.16068	1.16068
ADPRH	205	0.373103	1	0.211791	-4.72163	0.831623	1	0.751217	-1.33117
ADPRHL1	3797	0.752993	1	0.800803	-1.24875	0.385124	1	1.67623	1.67623
ADPRHL2	12799	0.627629	1	1.15149	1.15149	0.917657	1	0.969134	-1.03185
ADPRM	2262	0.322935	1	0.889142	-1.12468	0.65162	1	0.948338	-1.05448
ADRA1A	844.998	0.00678608	0.101569	0.0982596	-10.1771	0.006946	0.119902	0.104649	-9.55577
ADRA1B	17	0.685749	1	0.690773	-1.44765	0.301276	1	1.6762	1.6762
ADRA2A	144	1.28507e-06	6.35073e-05	0.283312	-3.52968	4.9326e-09	3.62724e-07	0.202243	-4.94454
ADRA2B	2024	0.908755	1	0.876214	-1.14127	0.667606	1	1.54434	1.54434
ADRA2C	1379	0.202414	0.979558	5.26367	5.26367	0.428887	1	2.98015	2.98015
ADRB1	226	0.803723	1	1.62225	1.62225	0.932838	1	1.21497	1.21497
ADRBK1	49002	0.658637	1	1.098	1.098	0.816081	1	1.051	1.051
ADRBK2	21763	0.743698	1	1.18964	1.18964	0.751783	1	1.18315	1.18315
ADRM1	49988.4	0.642221	1	1.06559	1.06559	0.443769	1	0.896374	-1.11561
ADSL	63019.3	0.714592	1	1.04743	1.04743	0.735343	1	0.957133	-1.04479
ADSS	29177	0.855793	1	1.04655	1.04655	0.993442	1	1.00208	1.00208
ADSSL1	504	0.53176	1	2.97585	2.97585	0.949127	1	1.14098	1.14098
AEBP1	201	0.640309	1	6.78913	6.78913	0.976752	1	1.13369	1.13369
AEBP2	48392.4	0.266767	1	0.746768	-1.3391	0.0188762	0.253115	0.49609	-2.01576
AEN	87806	0.679844	1	0.94135	-1.0623	0.0394886	0.430581	0.723132	-1.38287
AES	103297	0.654901	1	0.950496	-1.05208	0.549177	1	1.06832	1.06832
AFAP1	21562.2	0.837327	1	0.905296	-1.10461	0.857149	1	0.916715	-1.09085
AFAP1-AS1	250.088	0.409289	1	0.707293	-1.41384	0.967454	1	0.940745	-1.06299
AFAP1L1	1730	0.863296	1	1.33099	1.33099	0.387646	1	3.42752	3.42752
AFAP1L2	330	0.412512	1	0.614659	-1.62692	0.361655	1	1.51092	1.51092
AFF1	53058.2	0.56503	1	1.22857	1.22857	0.532557	1	1.24914	1.24914
AFF2	22914.2	0.135498	0.811134	0.0193266	-51.7422	0.74142	1	0.836923	-1.19485
AFF3	2955	0.873564	1	1.20048	1.20048	0.446351	1	0.216517	-4.61858
AFF4	80680	0.731414	1	0.90476	-1.10527	0.623231	1	1.14469	1.14469
AFG3L1P	21460.7	0.699627	1	0.880282	-1.136	0.551878	1	0.818254	-1.22211
AFG3L2	76075	0.302803	1	1.19056	1.19056	0.434775	1	1.14278	1.14278
AFMID	10967.6	0.724132	1	1.13393	1.13393	0.965656	1	0.984255	-1.016
AFTPH	16953.1	0.727856	1	0.869173	-1.15052	0.796804	1	1.10273	1.10273
AGA	10443	0.535847	1	1.24647	1.24647	0.895831	1	0.951517	-1.05095
AGAP1	45272.3	0.887447	1	0.944734	-1.0585	0.753181	1	0.879235	-1.13735
AGAP11	447.588	0.0389365	0.37595	1.28598	1.28598	0.496645	1	0.916316	-1.09133
AGAP2	405.084	4.24326e-06	0.000192138	7.80966	7.80966	0.000618376	0.0167426	4.54235	4.54235
AGAP2-AS1	10.916	0.324274	1	4.59324	4.59324	0.994138	1	1.0432	1.0432
AGAP3	35757	0.807043	1	1.0229	1.0229	0.196142	1	0.883313	-1.1321
AGAP4	4805.12	0.967904	1	1.02497	1.02497	0.802996	1	0.851635	-1.17421
AGAP5	3836.09	0.849134	1	0.888396	-1.12562	0.717141	1	0.79251	-1.26181
AGAP6	13959.3	0.234103	1	1.0413	1.0413	2.75338e-07	1.58678e-05	0.833868	-1.19923
AGAP7P	9902.62	0.700935	1	1.13157	1.13157	0.828651	1	0.929685	-1.07563
AGAP9	6644.61	0.793409	1	1.19186	1.19186	0.970423	1	1.02611	1.02611
AGBL3	475	0.0213085	0.243465	0.69445	-1.43999	0.699554	1	0.949139	-1.05359
AGBL5	28743.1	0.986243	1	0.995572	-1.00445	0.908839	1	0.970723	-1.03016
AGBL5-AS1	39	0.210081	0.996165	0.538265	-1.85782	0.261542	1	0.589934	-1.69511
AGER	2538	0.6928	1	1.02898	1.02898	0.00487812	0.0900395	0.803521	-1.24452
AGFG1	55343.2	0.8739	1	0.948016	-1.05483	0.492244	1	1.24182	1.24182
AGFG2	3191	0.937022	1	0.932084	-1.07286	0.956339	1	0.952876	-1.04945
AGGF1	24818	0.954216	1	0.980277	-1.02012	0.925714	1	1.03248	1.03248
AGK	28710	0.618057	1	1.14454	1.14454	0.331715	1	1.29143	1.29143
AGL	66132.5	0.888568	1	0.959579	-1.04212	0.396103	1	1.26369	1.26369
AGMAT	82.0077	0.00945331	0.131759	2.45667	2.45667	0.253188	1	1.55819	1.55819
AGMO	23	0.635164	1	1.00499	1.00499	0.0108134	0.167965	0.00462281	-216.319
AGO1	46954	0.945181	1	1.02206	1.02206	0.700148	1	0.880744	-1.1354
AGO2	32177.7	0.928595	1	1.02422	1.02422	0.919747	1	0.973112	-1.02763
AGO3	6464.98	0.722048	1	1.24281	1.24281	0.876005	1	1.10296	1.10296
AGO4	20797	0.892867	1	1.06613	1.06613	0.921298	1	1.0483	1.0483
AGPAT1	51221.3	0.860536	1	1.08238	1.08238	0.892018	1	1.0633	1.0633
AGPAT2	21452.7	0.698954	1	1.0878	1.0878	0.951758	1	1.01348	1.01348
AGPAT3	41749.8	0.423991	1	1.28335	1.28335	0.659819	1	0.85946	-1.16352
AGPAT4	8699	0.470621	1	0.57517	-1.73862	0.869448	1	0.894691	-1.1177
AGPAT4-IT1	407	0.663668	1	0.409222	-2.44366	0.981182	1	1.03712	1.03712
AGPAT5	46666	0.680089	1	0.894207	-1.11831	0.389417	1	0.785211	-1.27354
AGPAT6	41529	0.561331	1	1.20041	1.20041	0.945885	1	1.02242	1.02242
AGPAT9	11544.2	0.340344	1	1.84338	1.84338	0.000885474	0.0224842	6.34763	6.34763
AGPS	72369	0.801827	1	0.934639	-1.06993	0.894471	1	1.03543	1.03543
AGRN	60909	0.0243099	0.26874	0.503941	-1.98436	0.418005	1	0.807832	-1.23788
AGRP	106	0.311914	1	0.684555	-1.4608	0.45274	1	1.2996	1.2996
AGT	10	0.370806	1	0.513824	-1.94619	0.967094	1	0.830103	-1.20467
AGTPBP1	22941.6	0.767462	1	1.1188	1.1188	0.41435	1	1.34619	1.34619
AGTR1	475.999	0.0146282	0.183441	527.204	527.204	0.242006	1	2.80507	2.80507
AGTRAP	11455.9	0.498958	1	1.21206	1.21206	0.242057	1	1.3818	1.3818
AHCTF1	75145.8	0.677678	1	1.05792	1.05792	0.920807	1	1.01374	1.01374
AHCTF1P1	28299.9	0.897865	1	1.05765	1.05765	0.808798	1	1.11008	1.11008
AHCY	171270	0.424958	1	0.923081	-1.08333	0.882416	1	1.01459	1.01459
AHCYL1	63854	0.991948	1	1.00229	1.00229	0.991759	1	1.00234	1.00234
AHCYL2	17440.1	0.88213	1	0.936121	-1.06824	0.636539	1	1.21765	1.21765
AHDC1	9188	0.942307	1	0.951153	-1.05136	0.899341	1	1.08835	1.08835
AHI1	15624	0.627961	1	1.28089	1.28089	0.645903	1	1.26533	1.26533
AHNAK	200711	0.756837	1	0.915227	-1.09263	0.0251384	0.311865	1.74319	1.74319
AHNAK2	4179	0.618384	1	2.74325	2.74325	0.606383	1	2.826	2.826
AHR	4621	0.675689	1	0.707814	-1.4128	0.233228	1	0.232074	-4.30897
AHRR	2575.01	0.000182435	0.00523226	0.58386	-1.71274	0.107641	0.810016	0.802555	-1.24602
AHSA1	86283	0.264768	1	1.12053	1.12053	0.709698	1	0.961324	-1.04023
AHSA2	26051	0.904032	1	1.03405	1.03405	0.939778	1	1.02127	1.02127
AHSG	60	0.825459	1	0.257187	-3.88822	0.124636	0.871884	11.9133	11.9133
AICDA	16	0.166465	0.898236	6.96726	6.96726	0.485049	1	1.01454	1.01454
AIDA	47551	0.539353	1	0.883373	-1.13202	0.976842	1	0.994335	-1.0057
AIF1L	25277.7	0.605347	1	0.861499	-1.16077	0.154224	0.973677	0.638991	-1.56497
AIFM1	170818	0.100995	0.70276	1.20526	1.20526	0.20058	1	1.15839	1.15839
AIFM2	15312	0.6734	1	1.17409	1.17409	0.698106	1	1.15965	1.15965
AIFM3	455	0.257769	1	1.10295	1.10295	4.07312e-44	2.2691e-41	4.87955	4.87955
AIG1	10610	0.738977	1	0.955545	-1.04652	0.0107007	0.166855	1.38113	1.38113
AIM1	980	0.662116	1	0.677742	-1.47549	0.672283	1	0.682256	-1.46572
AIM1L	327	0.367549	1	1.58374	1.58374	0.0928626	0.74522	2.34225	2.34225
AIMP1	31681.9	0.586452	1	1.14737	1.14737	0.626791	1	0.876853	-1.14044
AIMP2	25495.2	0.858173	1	1.03173	1.03173	0.618374	1	0.914131	-1.09394
AIP	14662	0.283019	1	0.773783	-1.29235	0.668558	1	0.906686	-1.10292
AIPL1	11	0.459198	1	2.30359	2.30359	0.82886	1	0.334202	-2.9922
AIRN	12	0.159496	0.877896	4.38378	4.38378	0.12725	0.880783	6.17592	6.17592
AJUBA	16527.1	0.656329	1	0.810609	-1.23364	0.915845	1	1.04774	1.04774
AK1	1799	0.734078	1	1.09854	1.09854	0.879748	1	0.95899	-1.04276
AK2	123706	0.618852	1	0.91604	-1.09166	0.841918	1	0.965914	-1.03529
AK3	51684.2	0.0798589	0.610955	1.43085	1.43085	0.322338	1	0.79198	-1.26266
AK4	44613.7	0.214577	1	1.56447	1.56447	0.0779572	0.674113	1.85173	1.85173
AK5	62	0.869971	1	0.994628	-1.0054	0.787341	1	1.03972	1.03972
AK6	16737.8	0.46186	1	1.17581	1.17581	0.636985	1	0.894835	-1.11752
AK7	1415	0.814931	1	0.722911	-1.3833	0.783545	1	1.38245	1.38245
AK8	253	0.886268	1	1.01759	1.01759	0.976916	1	1.00026	1.00026
AK9	2019	0.704818	1	1.39364	1.39364	0.806049	1	0.787988	-1.26906
AKAP1	61086.3	0.122729	0.773297	1.41338	1.41338	0.726189	1	1.08681	1.08681
AKAP10	15653	0.823741	1	0.928452	-1.07706	0.973426	1	1.01108	1.01108
AKAP11	57748	0.538388	1	1.22526	1.22526	0.886989	1	0.951353	-1.05113
AKAP12	199433	0.411715	1	1.18378	1.18378	1.75084e-06	8.94095e-05	2.3694	2.3694
AKAP13	74176.6	0.982945	1	1.00753	1.00753	0.93183	1	1.03029	1.03029
AKAP14	15	0.0852845	0.635022	3.34882	3.34882	0.892242	1	0.912575	-1.0958
AKAP17A	30549	0.844154	1	1.05323	1.05323	0.944015	1	1.01887	1.01887
AKAP2	11598.8	0.556103	1	0.702877	-1.42272	0.304058	1	0.505269	-1.97914
AKAP3	1292	0.753639	1	0.670409	-1.49163	0.74741	1	0.662654	-1.50908
AKAP5	4528	0.760216	1	1.25561	1.25561	0.861562	1	0.868434	-1.1515
AKAP6	957	0.217117	1	1.20135	1.20135	0.000815358	0.021292	0.572093	-1.74797
AKAP7	3626	0.750427	1	1.22615	1.22615	0.697415	1	1.27887	1.27887
AKAP8	26994	0.951635	1	0.982662	-1.01764	0.768864	1	0.917347	-1.0901
AKAP8L	28724.2	0.921511	1	0.977623	-1.02289	0.858505	1	0.959696	-1.042
AKAP9	72048.1	0.958075	1	1.0184	1.0184	0.681694	1	1.14826	1.14826
AKIP1	8500.72	0.556797	1	1.23176	1.23176	0.501479	1	1.26736	1.26736
AKIRIN1	61353.5	0.919186	1	1.01744	1.01744	0.82985	1	0.963547	-1.03783
AKIRIN2	21655	0.40763	1	0.817879	-1.22267	0.630682	1	0.892245	-1.12077
AKNA	10441.2	0.96921	1	1.03046	1.03046	0.36802	1	1.85533	1.85533
AKNAD1	667.336	0.454585	1	0.306172	-3.26614	0.365699	1	0.0838761	-11.9223
AKR1A1	27244.1	0.823277	1	1.04435	1.04435	0.903833	1	0.976408	-1.02416
AKR1B1	55224	0.571614	1	0.930373	-1.07484	0.325511	1	0.8805	-1.13572
AKR1C1	296.154	0.0339898	0.344002	0.00422501	-236.686	0.30269	1	0.019189	-52.1132
AKR1C2	20.6573	0.200961	0.977887	0.137008	-7.29884	0.156215	0.982503	0.0519126	-19.2632
AKR1C3	167.188	0.339387	1	0.217412	-4.59957	0.266701	1	0.0418061	-23.92
AKR7A2	28208.6	0.47494	1	1.14496	1.14496	0.962969	1	0.990897	-1.00919
AKR7A2P1	789.368	0.938464	1	1.08344	1.08344	0.922389	1	1.10586	1.10586
AKR7A3	441.712	0.910898	1	1.07321	1.07321	0.580743	1	0.674387	-1.48283
AKR7L	910.329	0.914388	1	0.911231	-1.09742	0.63157	1	0.635485	-1.5736
AKT1	86114.1	0.196127	0.966449	0.838477	-1.19264	0.301436	1	0.869815	-1.14967
AKT1S1	40737.1	0.0800313	0.611511	1.47738	1.47738	0.512025	1	1.16632	1.16632
AKT2	71811	0.633527	1	1.11218	1.11218	0.56385	1	1.1366	1.1366
AKT3	55406.2	0.00779457	0.113188	0.433318	-2.30777	0.0700665	0.626218	0.599741	-1.66739
AKTIP	7089.81	0.929406	1	0.958234	-1.04359	0.567794	1	1.29219	1.29219
ALAD	9759	0.882051	1	1.06799	1.06799	0.836282	1	1.09547	1.09547
ALAS1	26592.3	0.076842	0.594555	1.58657	1.58657	0.115055	0.839527	1.51421	1.51421
ALAS2	29	0.899165	1	0.968124	-1.03293	0.457423	1	1.26879	1.26879
ALB	65	0.0918366	0.665218	0.0171771	-58.217	0.0868986	0.715756	0.0132494	-75.4749
ALCAM	12803	0.713713	1	1.23162	1.23162	0.947521	1	1.03966	1.03966
ALDH16A1	18592.9	0.916134	1	0.967643	-1.03344	0.241189	1	0.666327	-1.50076
ALDH18A1	100393	0.841782	1	0.970945	-1.02992	0.311421	1	0.856852	-1.16706
ALDH1A1	58	0.000593623	0.0140092	5.71837	5.71837	0.462807	1	1.57375	1.57375
ALDH1A2	23060.7	3.61844e-05	0.00127966	0.247699	-4.03716	0.000176386	0.00579051	0.0226874	-44.0772
ALDH1A3	13606.1	0.551009	1	1.32822	1.32822	0.107609	0.810016	2.02787	2.02787
ALDH1B1	61352	0.363288	1	1.1827	1.1827	0.455217	1	1.14884	1.14884
ALDH1L1	712	0.483902	1	0.214785	-4.65581	0.849819	1	1.28005	1.28005
ALDH1L1-AS2	17	0.152067	0.857787	0.155579	-6.42759	0.940841	1	1.22036	1.22036
ALDH1L2	362	0.00425411	0.0704573	1.86071	1.86071	0.774272	1	1.08806	1.08806
ALDH2	73	0.224993	1	4.96921	4.96921	0.950876	1	0.942199	-1.06135
ALDH3A1	389	0.954273	1	0.965493	-1.03574	0.861047	1	0.911951	-1.09655
ALDH3A2	45118.5	0.872875	1	1.04016	1.04016	0.381761	1	1.2299	1.2299
ALDH3B1	1551	0.997652	1	0.997998	-1.00201	0.15001	0.960825	2.95605	2.95605
ALDH4A1	16349	0.986632	1	0.993829	-1.00621	0.707964	1	0.866544	-1.15401
ALDH5A1	27331.9	0.19095	0.955612	1.57951	1.57951	0.95657	1	1.02118	1.02118
ALDH6A1	22611.5	0.338125	1	0.706413	-1.4156	0.182605	1	0.601951	-1.66127
ALDH7A1	36402.8	0.86853	1	1.04896	1.04896	0.517144	1	0.819179	-1.22074
ALDH8A1	237	7.37318e-10	5.67148e-08	2.04977	2.04977	1.44116e-06	7.4632e-05	1.74287	1.74287
ALDH9A1	38845	0.505856	1	1.14113	1.14113	0.84447	1	1.04061	1.04061
ALDOA	362656	0.794633	1	1.02081	1.02081	0.0164249	0.229799	1.20048	1.20048
ALDOC	5642.12	0.719798	1	1.25184	1.25184	0.00355468	0.0700421	4.50223	4.50223
ALG1	13471.3	0.625963	1	1.23503	1.23503	0.984918	1	0.991412	-1.00866
ALG10	8081.12	0.87395	1	1.08288	1.08288	0.977848	1	0.985838	-1.01437
ALG10B	20487.8	0.922284	1	1.05613	1.05613	0.883839	1	0.918772	-1.08841
ALG11	6856.1	0.917199	1	1.05362	1.05362	0.86306	1	1.08972	1.08972
ALG12	14123	0.69231	1	1.13803	1.13803	0.901788	1	0.958831	-1.04294
ALG13	36410.3	0.62548	1	0.941915	-1.06167	0.265055	1	0.870225	-1.14913
ALG14	4162	0.606032	1	1.23312	1.23312	0.928977	1	1.03842	1.03842
ALG1L	108.259	0.495615	1	0.165463	-6.04366	0.546724	1	0.263586	-3.79384
ALG1L9P	669.28	0.915488	1	1.14787	1.14787	0.848086	1	1.27341	1.27341
ALG2	15871.1	0.623678	1	1.1887	1.1887	0.896704	1	1.04825	1.04825
ALG3	25081.3	0.319593	1	1.2465	1.2465	0.592597	1	1.12882	1.12882
ALG5	13388	0.361211	1	1.24982	1.24982	0.759072	1	1.08055	1.08055
ALG6	13854	0.265615	1	1.43942	1.43942	0.854106	1	1.0664	1.0664
ALG8	27601.6	0.305181	1	1.22742	1.22742	0.822201	1	0.953404	-1.04887
ALG9	13818	0.825245	1	0.90197	-1.10868	0.764942	1	0.868195	-1.15181
ALK	21	0.618093	1	0.441953	-2.26269	0.469483	1	1.37252	1.37252
ALKBH1	9176	0.603535	1	1.24628	1.24628	0.955195	1	0.975066	-1.02557
ALKBH2	17534.9	0.180816	0.931907	1.32569	1.32569	0.827723	1	1.04956	1.04956
ALKBH3	7398	0.791205	1	1.10106	1.10106	0.926016	1	1.03486	1.03486
ALKBH3-AS1	63	0.551898	1	1.23674	1.23674	0.633347	1	1.14971	1.14971
ALKBH4	8416.06	0.752649	1	1.13447	1.13447	0.891179	1	0.944314	-1.05897
ALKBH5	69812	0.60107	1	1.0995	1.0995	0.678334	1	1.07852	1.07852
ALKBH6	3862.99	0.747059	1	1.1489	1.1489	0.773824	1	1.13213	1.13213
ALKBH7	8575	0.607346	1	0.840892	-1.18921	0.601841	1	1.17559	1.17559
ALKBH8	11953.1	0.567612	1	1.3103	1.3103	0.887239	1	1.07271	1.07271
ALMS1	50937	0.668874	1	0.838629	-1.19242	0.815542	1	0.91036	-1.09847
ALMS1-IT1	1694	0.836364	1	0.833497	-1.19976	0.777652	1	1.25248	1.25248
ALMS1P	203.967	0.651574	1	1.47746	1.47746	0.841885	1	0.832665	-1.20096
ALOX12	762.427	0.300643	1	1.54735	1.54735	0.218549	1	1.67004	1.67004
ALOX12B	801	0.946187	1	0.910779	-1.09796	0.942853	1	1.10076	1.10076
ALOX15	43.1317	0.000608062	0.0142949	760.753	760.753	0.00366108	0.0716014	34.3219	34.3219
ALOX15B	21	0.591125	1	1.62576	1.62576	0.887311	1	0.924356	-1.08183
ALOX5	194	2.86798e-08	1.81185e-06	0.255127	-3.91962	1.20781e-17	1.79068e-15	0.110255	-9.06992
ALOXE3	834	0.719098	1	0.566094	-1.76649	0.787336	1	0.666632	-1.50008
ALPK1	5498.01	0.520762	1	1.55114	1.55114	0.228769	1	0.223295	-4.47839
ALPK3	502	0.2422	1	1.75394	1.75394	0.853115	1	1.1325	1.1325
ALPL	5003.99	0.971067	1	1.02394	1.02394	0.376995	1	1.67793	1.67793
ALPPL2	10	0.321868	1	0.0475939	-21.0111	0.153098	0.971207	6.79904	6.79904
ALS2	19050	0.509452	1	1.40136	1.40136	0.428757	1	1.49134	1.49134
ALS2CL	2134.99	0.653785	1	0.388179	-2.57613	0.452626	1	2.67886	2.67886
ALS2CR11	146	0.0116385	0.154374	2.28914	2.28914	0.149101	0.958419	1.53031	1.53031
ALS2CR12	164	0.0351182	0.351408	2.42824	2.42824	0.438742	1	1.38313	1.38313
ALX1	4367	0.835532	1	1.09503	1.09503	0.976445	1	0.986836	-1.01334
ALX3	1202	1.29e-20	2.2705e-18	1.32772	1.32772	0.0547914	0.538367	1.05578	1.05578
ALX4	3508	0.188481	0.950038	3.94391	3.94391	0.614752	1	0.423465	-2.36147
ALYREF	103287	0.329473	1	1.08345	1.08345	0.394681	1	0.929905	-1.07538
AMACR	3951.78	0.711907	1	1.31712	1.31712	0.763871	1	1.25423	1.25423
AMBN	1103	0.000137839	0.00410701	77.6738	77.6738	6.01594e-05	0.00223881	0.00288936	-346.097
AMBRA1	10315	0.844326	1	0.888052	-1.12606	0.964542	1	0.974039	-1.02665
AMD1	116355	0.146516	0.844008	0.816816	-1.22427	0.0271182	0.332445	0.727458	-1.37465
AMDHD1	215	0.648129	1	3.46359	3.46359	0.981023	1	1.07773	1.07773
AMDHD2	6861.95	0.770501	1	1.1421	1.1421	0.995179	1	1.00286	1.00286
AMER1	31121	0.677193	1	0.846247	-1.18169	0.336471	1	0.661295	-1.51218
AMER2	245.372	0.000487326	0.0120417	0.204694	-4.88533	0.550814	1	0.782812	-1.27745
AMFR	54527	0.715341	1	1.08148	1.08148	0.403191	1	1.19185	1.19185
AMH	3100	0.902045	1	0.929334	-1.07604	0.31444	1	0.482576	-2.07221
AMIGO1	5696	0.783137	1	1.15214	1.15214	0.882904	1	0.923051	-1.08336
AMIGO2	53	0.266608	1	0.448392	-2.23019	0.152854	0.970999	0.106267	-9.41027
AMIGO3	3474	0.824224	1	1.17265	1.17265	0.763754	1	0.787811	-1.26934
AMMECR1	40004	0.857755	1	0.947322	-1.05561	0.431039	1	0.778295	-1.28486
AMMECR1L	26371.6	0.949172	1	1.02197	1.02197	0.887269	1	0.952013	-1.05041
AMN	77	0.391587	1	1.4782	1.4782	0.903469	1	0.99922	-1.00078
AMN1	3526	0.343692	1	1.82426	1.82426	0.231217	1	2.10102	2.10102
AMOT	37208.3	0.882602	1	1.06494	1.06494	0.0141585	0.20463	2.43893	2.43893
AMOTL1	49972.6	0.556614	1	0.817988	-1.22251	0.553539	1	0.81663	-1.22454
AMOTL2	15899.9	0.814857	1	0.896626	-1.11529	0.88055	1	0.933046	-1.07176
AMPD1	146	0.281303	1	67.9451	67.9451	0.883005	1	0.384794	-2.59879
AMPD2	29524	0.390188	1	1.32528	1.32528	0.514363	1	1.24204	1.24204
AMPD3	260	0.772915	1	2.16055	2.16055	0.636065	1	3.71713	3.71713
AMPH	103	0.00860989	0.122987	2.44101	2.44101	0.0947183	0.754136	1.88146	1.88146
AMT	1065.61	0.963874	1	1.05743	1.05743	0.795514	1	1.35238	1.35238
AMY2B	1146.6	0.75856	1	0.879304	-1.13726	0.462837	1	0.723402	-1.38236
AMZ1	73	0.0382532	0.371326	2.03702	2.03702	0.0178473	0.242739	2.20016	2.20016
AMZ2	28624.4	0.816949	1	0.952037	-1.05038	0.768812	1	0.939287	-1.06464
AMZ2P1	4861.5	0.97295	1	0.99908	-1.00092	0.313957	1	0.972754	-1.02801
ANAPC1	94472.4	0.634289	1	1.11681	1.11681	0.840879	1	1.04848	1.04848
ANAPC10	4044.47	0.764126	1	1.14099	1.14099	0.784502	1	0.879736	-1.13671
ANAPC11	26479.9	0.147409	0.844985	1.33418	1.33418	0.805453	1	1.0531	1.0531
ANAPC13	24198.6	0.269255	1	1.2713	1.2713	0.657123	1	0.900483	-1.11051
ANAPC15	17488.5	0.0446212	0.411648	0.636249	-1.57171	0.336279	1	0.817678	-1.22298
ANAPC16	23733.6	0.582925	1	1.18948	1.18948	0.784241	1	1.09227	1.09227
ANAPC1P1	34.375	0.3251	1	0.727015	-1.37549	0.816079	1	1.08871	1.08871
ANAPC2	21737	0.462417	1	1.22818	1.22818	0.815309	1	0.932558	-1.07232
ANAPC4	14627	0.958831	1	0.982359	-1.01796	0.959428	1	0.982611	-1.0177
ANAPC5	113821	0.174792	0.919949	1.18973	1.18973	0.226838	1	1.1681	1.1681
ANAPC7	46548.6	0.638522	1	0.900098	-1.11099	0.469896	1	0.848326	-1.17879
ANG	1656.08	0.902729	1	1.09796	1.09796	0.660605	1	1.37599	1.37599
ANGEL1	21753	0.4051	1	1.34064	1.34064	0.83452	1	1.08031	1.08031
ANGEL2	27790.1	0.76442	1	0.911468	-1.09713	0.917624	1	0.968943	-1.03205
ANGPT1	9799	0.841744	1	1.11625	1.11625	0.639049	1	1.28442	1.28442
ANGPT2	108.18	0.0951092	0.676922	0.68022	-1.47011	0.689338	1	1.08512	1.08512
ANGPTL1	118	0.568941	1	3.7886	3.7886	0.875978	1	1.27913	1.27913
ANGPTL2	64	0.769685	1	1.91375	1.91375	0.325601	1	0.395212	-2.53029
ANGPTL3	40	0.495317	1	0.77378	-1.29236	0.655959	1	0.770052	-1.29861
ANGPTL4	464	0.710857	1	2.34656	2.34656	0.357364	1	6.65406	6.65406
ANGPTL5	40	7.83092e-05	0.00253904	5.5732	5.5732	0.000990286	0.0246132	3.76987	3.76987
ANGPTL6	73.7173	0.146583	0.844008	1.79151	1.79151	0.0263374	0.324088	2.43409	2.43409
ANGPTL7	20	0.00905379	0.128035	5.81773	5.81773	0.0362785	0.404454	3.00689	3.00689
ANK1	198	0.528398	1	2.40053	2.40053	0.90573	1	1.10541	1.10541
ANK2	14234	0.489241	1	1.71886	1.71886	0.793452	1	0.781778	-1.27913
ANK3	19180	0.903701	1	0.882521	-1.13312	0.246888	1	2.61944	2.61944
ANKAR	1133	0.902177	1	1.12966	1.12966	0.54002	1	1.76557	1.76557
ANKDD1A	10570	0.946939	1	1.03748	1.03748	0.0357697	0.400481	2.64454	2.64454
ANKDD1B	32	0.60912	1	0.859939	-1.16287	0.0290056	0.34784	0.444658	-2.24892
ANKEF1	2748	0.841383	1	0.843996	-1.18484	0.973856	1	1.02727	1.02727
ANKFY1	69104	0.879466	1	1.04205	1.04205	0.913159	1	1.03018	1.03018
ANKH	17480	0.775752	1	1.16353	1.16353	0.751738	1	0.832764	-1.20082
ANKHD1	54955.2	0.748943	1	0.902714	-1.10777	0.874887	1	0.951538	-1.05093
ANKHD1-EIF4EBP3	39418.6	0.79152	1	1.0845	1.0845	0.759417	1	1.09835	1.09835
ANKIB1	31748	0.7575	1	1.11799	1.11799	0.557034	1	1.2306	1.2306
ANKLE1	22151.2	0.799192	1	0.9288	-1.07666	0.14565	0.946492	0.623015	-1.6051
ANKLE2	50397	0.767415	1	0.932598	-1.07227	0.643919	1	0.895635	-1.11653
ANKMY1	4123	0.665656	1	1.04179	1.04179	0.203886	1	0.881139	-1.13489
ANKMY2	12284	0.719205	1	0.87168	-1.14721	0.807789	1	1.09177	1.09177
ANKRA2	3988	0.861264	1	0.899248	-1.11204	0.963195	1	0.972898	-1.02786
ANKRD1	106	0.977983	1	0.908709	-1.10046	0.914556	1	1.44331	1.44331
ANKRD10	23214	0.628831	1	0.87011	-1.14928	0.356737	1	0.759241	-1.31711
ANKRD11	155174	0.535155	1	0.877039	-1.1402	0.96358	1	0.990683	-1.0094
ANKRD12	26704.4	0.894953	1	1.07356	1.07356	0.906187	1	1.06553	1.06553
ANKRD13A	32356	0.961043	1	0.987927	-1.01222	0.379905	1	1.23113	1.23113
ANKRD13B	27782	0.518765	1	1.19131	1.19131	0.907493	1	1.03314	1.03314
ANKRD13C	19275	0.950443	1	1.02706	1.02706	0.916944	1	0.955472	-1.0466
ANKRD13D	8563.96	0.718534	1	0.873588	-1.1447	0.809232	1	1.08965	1.08965
ANKRD16	6459.21	7.97041e-11	7.04462e-09	1.18018	1.18018	0.723921	1	0.991022	-1.00906
ANKRD17	115239	0.806812	1	1.05912	1.05912	0.845575	1	1.04694	1.04694
ANKRD18A	9516.43	0.517333	1	0.700644	-1.42726	0.791165	1	1.13661	1.13661
ANKRD18B	14182.6	0.930547	1	1.03701	1.03701	0.317208	1	1.47141	1.47141
ANKRD18DP	1222	0.627515	1	1.9225	1.9225	0.605815	1	1.99659	1.99659
ANKRD19P	14493.5	0.181711	0.933389	1.54641	1.54641	0.386279	1	1.33813	1.33813
ANKRD20A1	584.529	0.531657	1	3.27372	3.27372	0.710624	1	0.260115	-3.84446
ANKRD20A11P	222.88	0.563502	1	2.98232	2.98232	0.756052	1	1.87343	1.87343
ANKRD20A12P	920.762	0.833851	1	1.27845	1.27845	0.770349	1	1.39845	1.39845
ANKRD20A19P	275	0.141577	0.82996	1.44266	1.44266	0.00126475	0.0301571	0.0496052	-20.1592
ANKRD20A2	475.213	0.434683	1	5.47738	5.47738	0.700032	1	0.229836	-4.35092
ANKRD20A3	2299.87	0.565335	1	2.08665	2.08665	0.881607	1	0.797568	-1.25381
ANKRD20A4	1489.69	0.473834	1	1.19001	1.19001	0.899781	1	1.02963	1.02963
ANKRD20A5P	2797.77	0.868777	1	1.16732	1.16732	0.936087	1	1.07945	1.07945
ANKRD20A8P	326.505	0.488577	1	2.18065	2.18065	0.814466	1	0.710045	-1.40836
ANKRD20A9P	2938.25	0.468437	1	1.30404	1.30404	0.72627	1	1.12598	1.12598
ANKRD23	3486	0.750756	1	1.24204	1.24204	0.911166	1	0.921428	-1.08527
ANKRD24	1150	0.610046	1	2.79588	2.79588	0.440708	1	4.38835	4.38835
ANKRD26	23646	0.853595	1	0.923497	-1.08284	0.812143	1	0.902002	-1.10864
ANKRD26P1	28	0.276395	1	1.54952	1.54952	0.38497	1	1.51122	1.51122
ANKRD27	34653	0.428251	1	0.789167	-1.26716	0.900041	1	1.03558	1.03558
ANKRD28	30966.8	0.920487	1	0.962525	-1.03893	0.814693	1	1.09081	1.09081
ANKRD29	484	0.467311	1	24.959	24.959	0.592434	1	11.3195	11.3195
ANKRD30A	177	0.0167604	0.20392	0.000553183	-1807.72	0.036197	0.40379	0.0125197	-79.8738
ANKRD30BL	2707.25	0.677936	1	1.33477	1.33477	0.808038	1	0.827033	-1.20914
ANKRD31	356	0.309071	1	1.18847	1.18847	0.27841	1	1.20441	1.20441
ANKRD32	11413	0.986407	1	0.99273	-1.00732	0.623186	1	0.800226	-1.24965
ANKRD33B	9619	0.918264	1	0.919723	-1.08728	0.955823	1	1.04472	1.04472
ANKRD34A	1230	0.806287	1	1.45581	1.45581	0.681999	1	1.82415	1.82415
ANKRD34B	1996	0.464445	1	0.345542	-2.89401	0.650161	1	1.53642	1.53642
ANKRD35	10	0.258165	1	3.79996	3.79996	0.260652	1	4.33392	4.33392
ANKRD36	9446.6	0.929218	1	1.06389	1.06389	0.667835	1	1.32904	1.32904
ANKRD36B	10574.3	0.865616	1	0.896542	-1.1154	0.739717	1	1.22002	1.22002
ANKRD36BP1	8899	0.836358	1	1.08006	1.08006	0.872252	1	1.06205	1.06205
ANKRD37	1566.4	0.777338	1	1.27125	1.27125	0.059077	0.5639	3.83899	3.83899
ANKRD39	4683	0.614483	1	1.1964	1.1964	0.703428	1	1.14668	1.14668
ANKRD40	54482	0.535964	1	1.14636	1.14636	0.796229	1	0.941951	-1.06163
ANKRD42	5418.07	0.840485	1	1.17615	1.17615	0.720918	1	1.32367	1.32367
ANKRD44	3902	0.990096	1	1.01335	1.01335	0.934995	1	1.08831	1.08831
ANKRD44-IT1	16	0.929727	1	0.904644	-1.10541	0.527037	1	1.38974	1.38974
ANKRD45	116	0.159916	0.878365	5.05598	5.05598	0.113349	0.833025	6.80033	6.80033
ANKRD46	10214.9	1.1251e-10	9.53169e-09	0.751169	-1.33126	3.47163e-46	2.12741e-43	0.506656	-1.97372
ANKRD49	6301	0.879582	1	0.935922	-1.06846	0.703116	1	0.84257	-1.18684
ANKRD50	49628.3	0.00393446	0.0662373	0.298819	-3.34651	0.95414	1	1.01646	1.01646
ANKRD52	91205	0.136261	0.813583	1.44962	1.44962	0.782681	1	1.07621	1.07621
ANKRD53	71	0.122869	0.773297	0.808908	-1.23623	0.000871057	0.022241	0.500276	-1.9989
ANKRD54	12297.7	0.94085	1	0.975168	-1.02546	0.956269	1	1.01855	1.01855
ANKRD6	22621.9	0.447231	1	0.712456	-1.40359	0.803172	1	1.10407	1.10407
ANKRD61	919	0.972412	1	0.964494	-1.03681	0.868659	1	1.17911	1.17911
ANKRD62	89.3077	0.444075	1	1.47576	1.47576	0.801386	1	1.0238	1.0238
ANKRD62P1-PARP4P3	218.956	0.725782	1	1.94499	1.94499	0.916754	1	1.23486	1.23486
ANKRD63	466	0.606854	1	0.395157	-2.53064	0.586919	1	1.90679	1.90679
ANKRD65	269	0.419474	1	0.482458	-2.07272	0.844648	1	1.16088	1.16088
ANKRD9	8549	0.558942	1	1.22971	1.22971	0.672188	1	1.16371	1.16371
ANKS1A	28329	0.992885	1	1.0034	1.0034	0.911969	1	1.0426	1.0426
ANKS1B	427.576	1.00193e-20	1.80583e-18	12.1718	12.1718	5.25253e-09	3.83185e-07	4.17608	4.17608
ANKS3	8796.96	0.808562	1	1.118	1.118	0.85444	1	0.915052	-1.09283
ANKS4B	11.0009	0.337002	1	0.746262	-1.34001	0.0644649	0.595617	1.88454	1.88454
ANKS6	37485	0.636017	1	1.1787	1.1787	0.855818	1	0.935398	-1.06906
ANKUB1	51	0.00774545	0.112741	0.2417	-4.13736	0.00593747	0.104755	4.07175	4.07175
ANKZF1	14210.6	0.359918	1	0.7068	-1.41483	0.625993	1	1.17553	1.17553
ANLN	56109.6	0.539582	1	1.15229	1.15229	0.618904	1	1.12259	1.12259
ANO1	32	0.326171	1	2.27251	2.27251	0.106294	0.805486	11.7685	11.7685
ANO10	11552	1.39422e-36	5.33985e-34	1.37509	1.37509	1.12031e-88	2.05957e-85	1.66546	1.66546
ANO4	4876.02	0.0630764	0.522812	0.133501	-7.4906	0.123287	0.86939	0.306154	-3.26633
ANO5	18858	0.763692	1	1.16053	1.16053	0.702815	1	1.20596	1.20596
ANO6	38736.5	0.688726	1	0.869877	-1.14959	0.939418	1	0.974641	-1.02602
ANO7	1582	0.89056	1	1.16274	1.16274	0.670057	1	1.54932	1.54932
ANO8	13912.2	0.614168	1	1.26707	1.26707	0.406964	1	1.4592	1.4592
ANO9	106	1.35622e-07	7.69527e-06	0.12474	-8.01668	0.612273	1	0.850584	-1.17566
ANP32A	272802	0.00246478	0.0453126	0.788958	-1.2675	0.191064	1	0.906111	-1.10362
ANP32A-IT1	2000	0.892387	1	0.870064	-1.14934	0.88145	1	0.857204	-1.16658
ANP32AP1	16032	0.219003	1	0.803637	-1.24434	0.77743	1	0.953099	-1.04921
ANP32B	201750	0.751019	1	1.02352	1.02352	0.537219	1	1.046	1.046
ANP32C	4256.26	0.541638	1	0.817631	-1.22305	0.957486	1	0.983398	-1.01688
ANP32D	75.3259	0.981918	1	1.04579	1.04579	0.898523	1	1.2515	1.2515
ANP32E	127022	0.00253173	0.0462197	0.656143	-1.52406	0.13596	0.910913	0.822898	-1.21522
ANPEP	4964	0.198058	0.970606	0.265963	-3.75992	0.563392	1	1.42678	1.42678
ANTXR1	35945.1	0.282618	1	0.700504	-1.42754	0.0172711	0.237303	0.381677	-2.62002
ANTXR2	3526	0.989513	1	1.01502	1.01502	0.705316	1	0.625249	-1.59936
ANTXRL	13	0.042888	0.403844	262.353	262.353	0.325428	1	21.8512	21.8512
ANXA1	118751	0.129205	0.793232	1.43722	1.43722	6.09475e-60	5.09299e-57	21.5124	21.5124
ANXA10	19	0.000472862	0.0117316	475.16	475.16	0.000859469	0.0221193	143.415	143.415
ANXA11	39856.6	0.677307	1	0.897061	-1.11475	0.23726	1	1.32458	1.32458
ANXA2	128681	4.48813e-09	3.17345e-07	1.83775	1.83775	1.53935e-06	7.88282e-05	1.66175	1.66175
ANXA2P1	4277.3	0.176206	0.923932	1.94166	1.94166	0.299207	1	1.68585	1.68585
ANXA2P2	108434	1.0648e-10	9.06262e-09	1.86257	1.86257	1.30425e-07	7.7394e-06	1.67868	1.67868
ANXA2P3	161.743	0.461023	1	4.91048	4.91048	0.631285	1	2.93372	2.93372
ANXA2R	1892	0.901236	1	1.08789	1.08789	0.819391	1	1.16476	1.16476
ANXA4	15219	0.784935	1	0.913143	-1.09512	0.130171	0.89427	1.56222	1.56222
ANXA5	60524	0.0191703	0.226204	0.722226	-1.38461	0.824647	1	1.02839	1.02839
ANXA6	59869.6	0.837287	1	0.962068	-1.03943	0.640423	1	1.08904	1.08904
ANXA7	37459.6	0.535737	1	1.13493	1.13493	0.233402	1	1.26807	1.26807
ANXA9	1013	0.588613	1	1.40019	1.40019	0.745657	1	1.22903	1.22903
AOC1	11	0.851278	1	1.52352	1.52352	0.226302	1	0.203331	-4.91808
AOC2	1829	0.586077	1	1.64995	1.64995	0.808928	1	1.26408	1.26408
AOC3	850.676	0.592636	1	2.72016	2.72016	0.738029	1	1.92748	1.92748
AOX1	26	0.429599	1	7.43743	7.43743	0.413674	1	0.57027	-1.75356
AP1AR	24961.3	0.000764146	0.0173647	2.53441	2.53441	0.627167	1	0.845431	-1.18283
AP1B1	76081.3	0.9257	1	1.01832	1.01832	0.516768	1	1.13097	1.13097
AP1G1	89040.2	0.499391	1	1.11577	1.11577	0.26723	1	1.19396	1.19396
AP1G2	14244.7	0.202476	0.979558	0.59454	-1.68197	0.823343	1	1.08024	1.08024
AP1M1	37070.1	0.305862	1	1.23514	1.23514	0.619623	1	1.11061	1.11061
AP1M2	203	0.939912	1	0.614535	-1.62725	0.491619	1	18.0414	18.0414
AP1S1	21902	0.906991	1	0.976092	-1.02449	0.265129	1	1.24344	1.24344
AP1S2	11946.6	0.84675	1	0.936291	-1.06804	0.315596	1	0.689287	-1.45078
AP1S3	8044	0.492787	1	1.48255	1.48255	0.867326	1	1.10762	1.10762
AP2A1	53053.4	0.0702513	0.559857	1.42711	1.42711	0.0806125	0.686775	1.41067	1.41067
AP2A2	50158.8	0.828512	1	0.947058	-1.0559	0.294558	1	1.27777	1.27777
AP2B1	201563	0.292024	1	1.16826	1.16826	0.00260861	0.0541755	1.52172	1.52172
AP2M1	119273	0.599976	1	1.0558	1.0558	0.921417	1	1.01038	1.01038
AP2S1	38447.3	0.653956	1	1.06768	1.06768	0.986635	1	1.00249	1.00249
AP3B1	47730.1	0.468338	1	0.839982	-1.1905	0.858777	1	0.959533	-1.04217
AP3B2	667	0.428798	1	0.440883	-2.26818	0.652252	1	1.42288	1.42288
AP3D1	121712	0.275738	1	1.2001	1.2001	0.469264	1	1.13064	1.13064
AP3M1	67766.2	0.553204	1	1.14234	1.14234	0.943377	1	1.01653	1.01653
AP3M2	22725.8	0.972489	1	1.01137	1.01137	0.897842	1	1.04266	1.04266
AP3S1	28323	0.237781	1	1.2308	1.2308	0.362066	1	1.17586	1.17586
AP3S2	24041.4	0.723823	1	0.963808	-1.03755	0.690287	1	0.95901	-1.04274
AP4B1	9385.6	0.737418	1	1.15864	1.15864	0.895537	1	1.06061	1.06061
AP4B1-AS1	1131.43	0.253006	1	1.06331	1.06331	0.314717	1	1.05547	1.05547
AP4E1	22618.5	0.0517295	0.455676	1.38192	1.38192	0.561048	1	1.10672	1.10672
AP4M1	5701.86	0.328739	1	1.4267	1.4267	0.360052	1	1.39678	1.39678
AP4S1	4509.01	0.689712	1	1.30068	1.30068	0.668306	1	1.32573	1.32573
AP5B1	37071.8	0.951018	1	0.978974	-1.02148	0.92343	1	1.03335	1.03335
AP5M1	18389	0.0836735	0.627346	0.53093	-1.88349	0.791906	1	0.921154	-1.08559
AP5S1	3973.01	0.481719	1	1.38728	1.38728	0.743733	1	1.17077	1.17077
AP5Z1	10757	0.728716	1	1.22254	1.22254	0.941729	1	1.04491	1.04491
APAF1	40887	0.858845	1	0.938909	-1.06507	0.628353	1	1.17633	1.17633
APBA1	12395	0.054241	0.469255	0.0933955	-10.7071	0.887682	1	1.07333	1.07333
APBA2	31917.6	0.759035	1	1.0844	1.0844	0.68234	1	0.892691	-1.12021
APBA3	7596	0.594219	1	1.26179	1.26179	0.667208	1	1.2086	1.2086
APBB1	32750.2	0.499024	1	0.828905	-1.20641	0.945186	1	1.01825	1.01825
APBB1IP	11	0.00113096	0.0242044	112.685	112.685	0.00137831	0.0322377	83.2113	83.2113
APBB2	52627.1	0.16294	0.886241	1.72313	1.72313	0.0258314	0.319143	2.29053	2.29053
APBB3	19	0.383369	1	7.84388	7.84388	0.431747	1	0.811026	-1.23301
APC	59362.4	0.441546	1	1.30498	1.30498	0.89428	1	0.951681	-1.05077
APC2	4445	0.53823	1	2.43336	2.43336	0.49613	1	2.64187	2.64187
APCDD1	213	0.177842	0.928442	0.0854769	-11.6991	0.161745	0.995959	0.0357146	-27.9998
APCDD1L	32	0.217345	1	0.558381	-1.79089	0.0522383	0.521362	0.310041	-3.22538
APCDD1L-AS1	40	0.447806	1	0.85135	-1.17461	0.949082	1	0.981282	-1.01907
APEH	54306	0.144641	0.838824	0.806623	-1.23974	0.793693	1	1.03682	1.03682
APELA	5093	0.0277425	0.297387	0.280142	-3.56962	0.0216444	0.2796	0.0362407	-27.5932
APEX1	114796	0.857678	1	1.01709	1.01709	0.923831	1	0.990949	-1.00913
APEX2	32901.9	0.588201	1	1.11601	1.11601	0.888618	1	0.971052	-1.02981
APH1A	48595.7	0.620185	1	1.09104	1.09104	0.825244	1	1.04006	1.04006
APH1B	25264.1	0.420879	1	1.34017	1.34017	0.106116	0.805136	1.74687	1.74687
API5	111485	0.387656	1	0.87687	-1.14042	0.789878	1	0.961201	-1.04036
APIP	15211.7	0.440569	1	0.839511	-1.19117	0.146578	0.949549	0.707837	-1.41275
APITD1	8393.44	0.840346	1	1.07932	1.07932	0.830007	1	0.918791	-1.08839
APITD1-CORT	890.43	0.886782	1	1.17961	1.17961	0.819122	1	0.740702	-1.35007
APLF	920	0.735535	1	1.63785	1.63785	0.882693	1	1.25523	1.25523
APLN	5606	0.57853	1	1.40263	1.40263	0.926917	1	1.06129	1.06129
APLP1	14009	0.432934	1	1.08626	1.08626	5.05328e-16	6.83084e-14	2.14749	2.14749
APLP2	156789	0.668534	1	0.944009	-1.05931	0.229404	1	1.16605	1.16605
APMAP	41305	0.497437	1	1.13657	1.13657	0.779096	1	1.05534	1.05534
APOA1	103	0.223469	1	3.09907	3.09907	0.411308	1	2.25549	2.25549
APOA1BP	24331	0.719359	1	1.05935	1.05935	0.0564727	0.54924	1.33704	1.33704
APOA2	31	0.860774	1	0.763283	-1.31013	0.885056	1	1.26882	1.26882
APOBEC1	190	0.0229522	0.25776	5228.84	5228.84	0.0181829	0.24579	4036.7	4036.7
APOBEC2	290	0.785304	1	1.64983	1.64983	0.918529	1	0.800702	-1.2489
APOBEC3B	1053.81	0.712479	1	0.560782	-1.78322	0.21212	1	3.75199	3.75199
APOBEC3B-AS1	27.6721	0.85051	1	0.40134	-2.49165	0.77667	1	3.04825	3.04825
APOBEC3C	284.911	0.687268	1	0.383782	-2.60565	0.602655	1	2.19698	2.19698
APOBEC3D	44.9432	0.355614	1	0.375102	-2.66594	0.705132	1	2.52853	2.52853
APOBEC3F	1551.77	0.946771	1	0.880701	-1.13546	0.500341	1	2.7839	2.7839
APOBEC3G	16.7693	0.943148	1	0.668625	-1.49561	0.321756	1	5.24503	5.24503
APOBR	115	0.302826	1	1.16466	1.16466	0.0168031	0.232887	1.54424	1.54424
APOC1	1773.86	0.890473	1	1.0636	1.0636	0.30807	1	1.52467	1.52467
APOC1P1	15.1441	0.930301	1	1.01635	1.01635	0.449981	1	1.56312	1.56312
APOC4-APOC2	10.3254	0.992416	1	1.0772	1.0772	0.998636	1	0.986745	-1.01343
APOD	28	0.875713	1	13.1034	13.1034	0.564462	1	0.41056	-2.4357
APOE	1976	0.243126	1	3.90663	3.90663	0.027716	0.337736	10.9727	10.9727
APOF	40	0.00154329	0.0308724	0.315993	-3.16462	0.020463	0.268658	0.567977	-1.76063
APOL1	16.0025	0.742066	1	1.03552	1.03552	0.0803863	0.686083	0.260915	-3.83267
APOL2	9058.97	0.487275	1	1.37867	1.37867	0.571578	1	1.30303	1.30303
APOL4	14	0.343986	1	2.40002	2.40002	0.29048	1	3.05623	3.05623
APOL6	39	0.036395	0.359346	1.76816	1.76816	0.020791	0.272044	2.03676	2.03676
APOLD1	3545.01	0.258597	1	0.202219	-4.94512	0.991029	1	0.990768	-1.00932
APOM	767.281	0.00154272	0.0308724	0.658358	-1.51893	0.00168748	0.0383944	0.658259	-1.51916
APOO	17325.5	0.458342	1	1.16813	1.16813	0.5655	1	1.12906	1.12906
APOOL	49661.3	0.671034	1	0.883969	-1.13126	0.711241	1	0.898493	-1.11298
APOOP5	918.634	0.901933	1	1.10257	1.10257	0.997882	1	0.997656	-1.00235
APOPT1	9379	0.452725	1	1.24629	1.24629	0.881876	1	1.04643	1.04643
APP	225819	0.00177484	0.0347853	1.41305	1.41305	0.0533313	0.528756	1.2456	1.2456
APPBP2	30605.9	0.843472	1	1.07629	1.07629	0.959861	1	1.01917	1.01917
APPL1	50122.6	0.833889	1	1.06358	1.06358	0.444742	1	1.24193	1.24193
APPL2	20509	0.0468796	0.426331	0.496489	-2.01414	0.173177	1	0.642836	-1.55561
APRT	46497.8	0.325787	1	1.11068	1.11068	0.817269	1	1.02548	1.02548
APTR	5949.41	0.58738	1	1.26499	1.26499	0.841448	1	1.09364	1.09364
APTX	18168	0.519749	1	1.20858	1.20858	0.811125	1	1.07496	1.07496
AQP1	99	0.103442	0.710077	2.96045	2.96045	0.941185	1	1.07092	1.07092
AQP11	1845	0.585281	1	1.27656	1.27656	0.563304	1	1.29425	1.29425
AQP3	2715	0.949211	1	1.04771	1.04771	0.539272	1	1.51278	1.51278
AQP4	22974.5	0.294755	1	1935.92	1935.92	0.430337	1	300.297	300.297
AQP4-AS1	261	0.184981	0.940715	40.1952	40.1952	0.733262	1	3.13512	3.13512
AQP6	251	0.00253807	0.0462895	1.85559	1.85559	2.12048e-05	0.000894105	2.3211	2.3211
AQP7P1	42	0.18177	0.933389	3.8262	3.8262	0.354879	1	2.39558	2.39558
AQP7P3	15	0.228302	1	12.8622	12.8622	0.885867	1	2.63842	2.63842
AQPEP	84	0.0323672	0.331313	1.71028	1.71028	0.854135	1	0.942764	-1.06071
AQR	49927	0.906965	1	0.970105	-1.03082	0.996115	1	1.00126	1.00126
AR	92967.2	0.122926	0.773297	0.635392	-1.57383	0.850769	1	0.95183	-1.05061
ARAF	49760.9	0.240869	1	1.27712	1.27712	0.294581	1	1.24583	1.24583
ARAP1	29784.5	2.41193e-29	7.03825e-27	1.15423	1.15423	1.20636e-73	1.3861e-70	1.29856	1.29856
ARAP2	2939	0.457232	1	1.75086	1.75086	0.923604	1	1.08266	1.08266
ARAP3	5277	0.125058	0.780136	0.061088	-16.3698	0.521331	1	0.638027	-1.56733
ARC	885	0.707048	1	1.09307	1.09307	0.484019	1	1.18238	1.18238
ARCN1	137521	0.544165	1	1.08746	1.08746	0.992251	1	1.00137	1.00137
AREL1	38976	0.463711	1	1.25042	1.25042	0.744035	1	1.10782	1.10782
ARF1	203586	0.923537	1	1.0081	1.0081	0.671184	1	0.964581	-1.03672
ARF3	107947	0.916417	1	1.0158	1.0158	0.563372	1	1.08858	1.08858
ARF4	72791	0.685949	1	0.950276	-1.05233	0.872378	1	0.980097	-1.02031
ARF5	40309	0.263356	1	0.860326	-1.16235	0.543348	1	0.922891	-1.08355
ARF6	61507	0.829156	1	0.957246	-1.04466	0.568694	1	0.889002	-1.12486
ARFGAP1	32249.2	0.722585	1	1.11039	1.11039	0.897464	1	1.03938	1.03938
ARFGAP2	36450.4	0.722284	1	1.08695	1.08695	0.853095	1	1.04483	1.04483
ARFGAP3	13905.9	0.26246	1	1.44362	1.44362	0.250758	1	1.45603	1.45603
ARFGEF1	45711	0.68597	1	1.14199	1.14199	0.123663	0.869769	1.60115	1.60115
ARFGEF2	42156	0.673293	1	1.14833	1.14833	0.675523	1	1.14723	1.14723
ARFIP1	22214.3	0.0634914	0.525068	1.77705	1.77705	0.658546	1	1.16115	1.16115
ARFIP2	17466	0.81456	1	1.09077	1.09077	0.714094	1	0.865979	-1.15476
ARFRP1	11834	0.636322	1	1.19336	1.19336	0.72964	1	0.869585	-1.14997
ARG1	13	0.281087	1	0.641194	-1.55959	0.837014	1	0.885011	-1.12993
ARG2	18599.8	0.172682	0.913887	0.69181	-1.44548	0.511823	1	0.845827	-1.18227
ARGFX	17	0.202323	0.979558	0.293511	-3.40703	0.55343	1	2.55234	2.55234
ARGFXP2	187	0.932158	1	1.16448	1.16448	0.968728	1	1.07153	1.07153
ARGLU1	55167	0.564869	1	0.920796	-1.08602	0.417724	1	0.889379	-1.12438
ARHGAP1	22316	0.721301	1	1.11109	1.11109	0.555216	1	1.18709	1.18709
ARHGAP10	13473	0.664017	1	1.19159	1.19159	0.434534	1	1.35848	1.35848
ARHGAP11A	103041	0.338383	1	0.824892	-1.21228	0.981613	1	0.995596	-1.00442
ARHGAP11B	4775.96	0.598574	1	0.813876	-1.22869	0.833044	1	1.07968	1.07968
ARHGAP12	16340	0.232253	1	1.19645	1.19645	0.264277	1	1.18316	1.18316
ARHGAP15	13	0.300356	1	5.25147	5.25147	0.983155	1	0.888757	-1.12517
ARHGAP17	34080.2	0.662007	1	0.905472	-1.1044	0.67693	1	1.09455	1.09455
ARHGAP18	20331	0.435409	1	0.764682	-1.30773	0.83309	1	0.933633	-1.07108
ARHGAP19	43472.3	0.722495	1	1.1106	1.1106	0.619437	1	1.15641	1.15641
ARHGAP19-SLIT1	102.121	0.741693	1	0.308937	-3.2369	0.952711	1	0.854126	-1.17079
ARHGAP20	72	0.0165037	0.201732	0.144561	-6.91747	0.0171459	0.236112	0.194494	-5.14155
ARHGAP21	47586	0.38503	1	0.759068	-1.31741	0.576334	1	0.841731	-1.18803
ARHGAP22	3518	0.322005	1	2.81836	2.81836	0.404898	1	2.43348	2.43348
ARHGAP23	1426	0.29054	1	10.1256	10.1256	0.450538	1	5.55665	5.55665
ARHGAP24	91	0.916315	1	1.09156	1.09156	0.0330386	0.380278	0.135087	-7.40265
ARHGAP26	3617	0.850418	1	0.832212	-1.20162	0.931854	1	1.07975	1.07975
ARHGAP27	3346	0.734228	1	0.63406	-1.57714	0.466308	1	2.1125	2.1125
ARHGAP28	15	0.233051	1	3.39528	3.39528	0.296313	1	3.09217	3.09217
ARHGAP29	129	0.712375	1	0.908755	-1.10041	0.713672	1	0.934837	-1.0697
ARHGAP30	98	0.506566	1	1.10247	1.10247	0.0103961	0.163492	1.9546	1.9546
ARHGAP31	13711	0.611771	1	0.728507	-1.37267	0.974397	1	1.01855	1.01855
ARHGAP31-AS1	213	0.997879	1	1.00407	1.00407	0.859895	1	1.27487	1.27487
ARHGAP32	24757.2	0.820725	1	0.88505	-1.12988	0.965295	1	1.02285	1.02285
ARHGAP33	15860	0.506175	1	0.735758	-1.35914	0.683281	1	1.18129	1.18129
ARHGAP35	97219	0.722436	1	0.914703	-1.09325	0.855688	1	1.04512	1.04512
ARHGAP36	33	0.054712	0.471864	0.0366905	-27.255	0.0232695	0.295025	0.00212787	-469.953
ARHGAP39	13894	0.462384	1	1.43392	1.43392	0.915686	1	1.05716	1.05716
ARHGAP4	4000.03	0.504484	1	0.491451	-2.03479	0.215447	1	2.45558	2.45558
ARHGAP40	19	0.413818	1	1.94599	1.94599	0.894731	1	0.964832	-1.03645
ARHGAP42	817	0.383944	1	0.239002	-4.18406	0.767536	1	0.719964	-1.38896
ARHGAP44	4919	0.338421	1	2.37106	2.37106	0.30483	1	2.50435	2.50435
ARHGAP5	63192.1	0.0643632	0.528474	0.552695	-1.80932	0.117199	0.847264	0.615413	-1.62493
ARHGAP5-AS1	1391	1.25033e-31	4.33698e-29	0.473925	-2.11004	1.24829e-22	2.39048e-20	0.543689	-1.83929
ARHGAP6	1025	4.09763e-16	5.53904e-14	0.0532721	-18.7715	0.000513375	0.0142897	0.00502609	-198.962
ARHGAP8	6307.58	0.0388498	0.375507	0.387233	-2.58243	0.123713	0.869769	0.530176	-1.88617
ARHGAP9	100	0.0262897	0.285307	3.58215	3.58215	0.574576	1	0.712591	-1.40333
ARHGDIA	222272	0.0179733	0.214978	0.823935	-1.21369	0.514959	1	0.949977	-1.05266
ARHGDIB	22	0.792403	1	2.49977	2.49977	0.273186	1	0.167095	-5.98464
ARHGDIG	3714	0.172043	0.912277	0.539511	-1.85353	0.30678	1	1.42968	1.42968
ARHGEF1	33690.3	3.7849e-08	2.33495e-06	1.09457	1.09457	7.4663e-05	0.00268612	1.06728	1.06728
ARHGEF10	31275	0.919365	1	0.96624	-1.03494	0.849682	1	0.937243	-1.06696
ARHGEF10L	4541.98	0.801259	1	0.884789	-1.13021	0.880685	1	1.07274	1.07274
ARHGEF11	30296	0.807126	1	1.05762	1.05762	0.870646	1	1.03846	1.03846
ARHGEF12	128696	0.590551	1	0.885251	-1.12962	0.667259	1	0.907786	-1.10158
ARHGEF15	14	0.643963	1	1.45514	1.45514	0.282904	1	2.06712	2.06712
ARHGEF16	2889	0.896225	1	1.09519	1.09519	0.850955	1	0.871155	-1.1479
ARHGEF17	13086	0.258475	1	0.441138	-2.26687	0.930589	1	0.951236	-1.05126
ARHGEF18	29944.7	0.637874	1	1.18812	1.18812	0.638811	1	1.18756	1.18756
ARHGEF19	1996	8.20389e-49	6.03281e-46	0.502991	-1.98811	6.91275e-50	4.53871e-47	0.497917	-2.00837
ARHGEF2	21769.9	0.546952	1	0.802277	-1.24645	0.863128	1	0.941373	-1.06228
ARHGEF25	12512	0.8871	1	0.947073	-1.05588	0.600164	1	0.811212	-1.23272
ARHGEF26	22946	0.190716	0.955087	1.6356	1.6356	0.654485	1	0.820832	-1.21828
ARHGEF26-AS1	51.1849	0.00126408	0.0264379	4.0458	4.0458	0.597822	1	0.844397	-1.18428
ARHGEF28	13870.9	0.0286521	0.303772	19.5793	19.5793	0.0580823	0.559929	13.5169	13.5169
ARHGEF3	6135	0.840443	1	1.19337	1.19337	0.198261	1	2.65913	2.65913
ARHGEF33	91.3021	0.0604979	0.506279	2.06955	2.06955	0.498842	1	1.20515	1.20515
ARHGEF34P	22.3338	0.815875	1	0.209615	-4.77065	0.894488	1	0.62638	-1.59647
ARHGEF35	32.7868	0.325817	1	0.110191	-9.07516	0.406067	1	0.830091	-1.20469
ARHGEF37	1106	0.819606	1	0.727589	-1.3744	0.938435	1	1.10449	1.10449
ARHGEF38	297.139	0.933346	1	0.994179	-1.00585	0.659905	1	0.928726	-1.07674
ARHGEF39	16857.2	0.535713	1	1.04683	1.04683	0.243535	1	1.0896	1.0896
ARHGEF4	5886.98	0.873417	1	0.915448	-1.09236	0.414169	1	1.49964	1.49964
ARHGEF40	14254.1	0.593213	1	1.33035	1.33035	0.621181	1	1.30366	1.30366
ARHGEF5	195.879	0.684036	1	0.187535	-5.33235	0.785212	1	0.552487	-1.81
ARHGEF6	53604	8.30203e-06	0.000354117	3.39703	3.39703	0.745808	1	1.1137	1.1137
ARHGEF7	35522.7	0.453823	1	0.827301	-1.20875	0.815779	1	0.944656	-1.05859
ARHGEF9	22615	0.658614	1	1.20907	1.20907	0.534833	1	1.30009	1.30009
ARID1A	146865	0.691972	1	0.923448	-1.0829	0.76316	1	1.06025	1.06025
ARID1B	53502.9	0.768937	1	0.905392	-1.10449	0.580174	1	0.825445	-1.21147
ARID2	43941	0.819592	1	0.921451	-1.08525	0.92735	1	0.968223	-1.03282
ARID3A	13386	0.922829	1	1.03812	1.03812	0.568588	1	1.23542	1.23542
ARID3B	41160	0.503112	1	1.18856	1.18856	0.912336	1	1.02983	1.02983
ARID3C	98	0.576703	1	0.488603	-2.04665	0.507433	1	0.430508	-2.32284
ARID4A	14977	0.8765	1	1.0824	1.0824	0.861898	1	1.09246	1.09246
ARID4B	31680.8	0.777507	1	0.900932	-1.10996	0.943798	1	1.02551	1.02551
ARID5A	5121	0.360468	1	1.17106	1.17106	0.20604	1	1.24048	1.24048
ARID5B	36045.8	0.118454	0.76009	0.301653	-3.31507	0.00111105	0.0269111	3.86517	3.86517
ARIH1	101012	0.596576	1	0.905621	-1.10421	0.851922	1	1.03438	1.03438
ARIH2	78919.5	0.16477	0.891464	1.29295	1.29295	0.596345	1	1.10681	1.10681
ARIH2OS	651.705	0.818882	1	1.13827	1.13827	0.596733	1	1.34059	1.34059
ARL1	26259.3	0.534664	1	1.18832	1.18832	0.815371	1	0.933502	-1.07123
ARL10	60	0.00636049	0.0961605	2.47507	2.47507	0.382946	1	1.28623	1.28623
ARL11	78	0.0470398	0.427052	0.231184	-4.32556	0.682563	1	0.865187	-1.15582
ARL13A	110	0.705173	1	1.10416	1.10416	0.0309262	0.363746	1.81457	1.81457
ARL13B	8895.03	2.99485e-07	1.64344e-05	1.13299	1.13299	0.0107785	0.167642	0.939429	-1.06448
ARL14EP	12671.4	0.907041	1	1.03503	1.03503	0.655374	1	0.871559	-1.14737
ARL15	6892	0.8456	1	0.905922	-1.10385	0.782326	1	1.14155	1.14155
ARL16	9989	0.745624	1	1.09356	1.09356	0.705791	1	0.896368	-1.11561
ARL17A	32933.2	0.982351	1	1.0194	1.0194	0.886705	1	1.12814	1.12814
ARL17B	227.206	0.988624	1	1.04762	1.04762	0.575572	1	4.35104	4.35104
ARL2	30104.1	0.251827	1	1.17843	1.17843	0.683873	1	0.940222	-1.06358
ARL2-SNX15	1884.99	0.952408	1	0.94288	-1.06058	0.761829	1	1.31789	1.31789
ARL2BP	41264	0.584986	1	1.10648	1.10648	0.624863	1	1.09507	1.09507
ARL3	16617	0.772115	1	0.891427	-1.1218	0.896572	1	1.05067	1.05067
ARL4A	23517	8.70103e-05	0.00276269	3.66432	3.66432	0.134464	0.909324	1.73461	1.73461
ARL4C	14227.9	0.0242987	0.26874	0.12788	-7.8198	0.120433	0.856824	1.81334	1.81334
ARL4D	2326	0.887355	1	1.10343	1.10343	0.660322	1	1.33945	1.33945
ARL5A	38174.5	0.576791	1	1.13104	1.13104	0.188762	1	0.721576	-1.38586
ARL5B	23578	0.618436	1	0.856459	-1.1676	0.465119	1	0.79287	-1.26124
ARL6	2350	0.708329	1	1.25265	1.25265	0.905237	1	0.926363	-1.07949
ARL6IP1	146967	0.0154691	0.19123	0.779136	-1.28347	0.55977	1	0.944521	-1.05874
ARL6IP4	53038.3	0.489488	1	0.900454	-1.11055	0.485708	1	0.899607	-1.1116
ARL6IP5	38173	0.0341964	0.345422	1.56596	1.56596	0.0012575	0.0300233	1.93007	1.93007
ARL6IP6	19253.9	0.21424	1	0.682672	-1.46483	0.234737	1	0.695433	-1.43795
ARL8A	13320.9	0.526795	1	0.82918	-1.20601	0.940246	1	1.02123	1.02123
ARL8B	43599	0.73061	1	1.07599	1.07599	0.923295	1	1.02096	1.02096
ARL9	10	0.380969	1	2.45211	2.45211	0.956659	1	1.4284	1.4284
ARMC1	38505.5	0.859458	1	0.9633	-1.0381	0.53336	1	0.873735	-1.14451
ARMC10	19900.4	0.638618	1	1.12777	1.12777	0.66011	1	1.1194	1.1194
ARMC12	633	0.681126	1	1.66329	1.66329	0.537258	1	2.08287	2.08287
ARMC2	1510	0.783637	1	1.42579	1.42579	0.757448	1	1.48371	1.48371
ARMC2-AS1	27	0.821802	1	1.67961	1.67961	0.901405	1	0.566563	-1.76503
ARMC4	2566	3.41854e-10	2.74439e-08	1.94831	1.94831	0.113807	0.834884	0.828997	-1.20628
ARMC5	9289.07	0.793233	1	0.856772	-1.16717	0.786686	1	0.852278	-1.17333
ARMC6	35137.1	0.631308	1	1.10511	1.10511	0.39952	1	0.827857	-1.20794
ARMC7	7718	0.703056	1	1.17253	1.17253	0.904903	1	0.948848	-1.05391
ARMC8	20293	0.984084	1	0.993476	-1.00657	0.956919	1	1.01786	1.01786
ARMC9	10371.9	0.762433	1	0.799415	-1.25091	0.554668	1	1.46058	1.46058
ARMCX1	18	0.433429	1	3.38591	3.38591	0.855434	1	3.28094	3.28094
ARMCX2	15	0.923392	1	1.93438	1.93438	0.476125	1	0.0114997	-86.9588
ARMCX3	40450.5	0.512029	1	1.17226	1.17226	0.520697	1	1.16859	1.16859
ARMCX4	26.1124	0.907414	1	1.3281	1.3281	0.517456	1	0.623531	-1.60377
ARMCX5	20877.7	0.895236	1	0.976292	-1.02428	0.528046	1	1.11774	1.11774
ARMCX5-GPRASP2	9177.68	0.661306	1	0.79588	-1.25647	0.618201	1	0.769369	-1.29977
ARMCX6	15512.1	0.573693	1	1.17131	1.17131	0.814329	1	0.932593	-1.07228
ARMS2	26	3.52481e-06	0.000163244	0.237934	-4.20285	9.87903e-07	5.23389e-05	0.203985	-4.90231
ARNT	25818.7	0.730224	1	1.13764	1.13764	0.360118	1	1.38751	1.38751
ARNT2	41108	0.191119	0.955612	1.53059	1.53059	0.742394	1	1.12129	1.12129
ARNTL	3719.99	0.554511	1	0.644299	-1.55207	0.810987	1	0.848431	-1.17865
ARNTL2	21927.2	0.646629	1	1.15649	1.15649	0.629349	1	1.16513	1.16513
ARNTL2-AS1	89.1184	0.971595	1	1.07565	1.07565	0.836974	1	1.54435	1.54435
ARPC1A	82576.9	0.450055	1	0.91758	-1.08982	0.780717	1	0.969225	-1.03175
ARPC1B	27718.4	0.967495	1	1.00861	1.00861	0.0137555	0.201018	1.59742	1.59742
ARPC2	91653.9	0.00491913	0.07905	0.734665	-1.36117	0.548216	1	0.940314	-1.06347
ARPC3	61263.9	0.897036	1	0.986736	-1.01344	0.403968	1	1.08772	1.08772
ARPC4	33685.1	0.798887	1	1.05331	1.05331	0.753424	1	1.06593	1.06593
ARPC4-TTLL3	7012.73	0.836995	1	0.879669	-1.13679	0.89619	1	1.08029	1.08029
ARPC5	63008.1	0.514854	1	0.907585	-1.10183	0.870239	1	0.976415	-1.02415
ARPC5L	23364	0.811327	1	1.0403	1.0403	0.366686	1	0.854574	-1.17017
ARPIN	22.1278	0.0927864	0.668094	1.41238	1.41238	0.21116	1	0.806111	-1.24052
ARPP19	168268	0.509084	1	1.09564	1.09564	0.367082	1	0.876335	-1.14112
ARPP21	64	0.661934	1	1.2502	1.2502	0.00051379	0.0142897	0.00506988	-197.243
ARR3	82	0.576728	1	1.37727	1.37727	0.428475	1	1.60338	1.60338
ARRB1	12602.9	0.371775	1	1.76602	1.76602	0.801851	1	1.18917	1.18917
ARRB2	33946.8	0.503304	1	0.879166	-1.13744	0.450577	1	0.864318	-1.15698
ARRDC1	6777	0.681854	1	0.846086	-1.18191	0.800713	1	1.10104	1.10104
ARRDC1-AS1	8274.98	0.00193362	0.0371195	1.29158	1.29158	0.703792	1	1.03313	1.03313
ARRDC2	10318	0.84359	1	1.08797	1.08797	0.650493	1	1.20815	1.20815
ARRDC3	29891	0.761234	1	0.909242	-1.09982	0.711766	1	1.1162	1.1162
ARRDC3-AS1	1191	0.784591	1	0.753239	-1.3276	0.808906	1	0.779128	-1.28349
ARRDC4	7981	0.964216	1	1.02681	1.02681	0.888883	1	1.08469	1.08469
ARSA	7745.01	0.67503	1	1.2962	1.2962	0.506575	1	1.49076	1.49076
ARSB	10372	0.78167	1	1.1977	1.1977	0.904914	1	1.08288	1.08288
ARSD	3426	0.86281	1	0.840788	-1.18936	0.551384	1	1.66922	1.66922
ARSE	46	0.196899	0.967481	0.553764	-1.80582	0.678715	1	0.825827	-1.21091
ARSG	4330	0.464937	1	1.69688	1.69688	0.394105	1	1.83659	1.83659
ARSI	292	0.761967	1	0.441021	-2.26747	0.377233	1	5.27698	5.27698
ARSJ	295	0.973401	1	0.882138	-1.13361	0.704949	1	3.2596	3.2596
ARSK	8287	0.208876	0.993524	1.67937	1.67937	0.36458	1	1.46806	1.46806
ART1	64	0.698419	1	29.7731	29.7731	0.574778	1	0.0129737	-77.0788
ART3	14	0.000963279	0.0212337	0.00480329	-208.19	0.403562	1	0.739852	-1.35162
ART5	615	0.729878	1	0.628309	-1.59157	0.803243	1	0.725521	-1.37832
ARTN	193	0.00349759	0.0600346	0.648205	-1.54272	0.846005	1	1.03628	1.03628
ARV1	17063	0.257134	1	1.3089	1.3089	0.638612	1	1.12244	1.12244
ARVCF	11480.4	0.54556	1	0.755994	-1.32276	0.457524	1	0.703986	-1.42048
ARX	6437	0.0182522	0.217606	0.248356	-4.02649	0.00972676	0.155628	0.160408	-6.23411
AS3MT	15775.6	0.381127	1	0.741297	-1.34899	0.696942	1	1.12675	1.12675
ASAH1	22000.1	0.221927	1	1.45418	1.45418	0.424103	1	1.28594	1.28594
ASAH2	278.004	0.62987	1	1.40888	1.40888	0.977841	1	0.970356	-1.03055
ASAH2B	843.996	0.162543	0.88513	0.900945	-1.10995	0.00991622	0.158109	0.822679	-1.21554
ASAP1	58175.8	0.906051	1	0.968284	-1.03275	0.811982	1	1.06548	1.06548
ASAP1-IT1	12	0.0277374	0.297387	0.314585	-3.17879	0.0499351	0.506875	0.42009	-2.38044
ASAP1-IT2	175	0.935043	1	0.894704	-1.11769	0.939699	1	0.886477	-1.12806
ASAP2	29329.4	0.284713	1	0.695878	-1.43703	0.884119	1	0.955615	-1.04645
ASAP3	16852.2	0.396079	1	0.694542	-1.4398	0.87939	1	1.0599	1.0599
ASB1	31246	0.950853	1	0.981085	-1.01928	0.68674	1	0.878662	-1.13809
ASB11	16	0.694676	1	15.2908	15.2908	0.98504	1	1.13407	1.13407
ASB12	177	0.852678	1	0.834571	-1.19822	0.295523	1	0.285857	-3.49825
ASB13	22876.6	0.413813	1	1.25453	1.25453	0.858564	1	0.948514	-1.05428
ASB14	1026.43	0.207764	0.991105	1.08458	1.08458	3.83989e-05	0.00150517	1.30065	1.30065
ASB16	1435.32	0.841274	1	0.821135	-1.21783	0.890702	1	0.875435	-1.14229
ASB16-AS1	4840.67	0.000143034	0.00423435	0.931633	-1.07338	0.091115	0.735569	1.03151	1.03151
ASB18	44	3.39113e-05	0.00122001	4.11906	4.11906	0.0890431	0.723877	0.709799	-1.40885
ASB2	117	0.923012	1	36.8963	36.8963	0.973905	1	1.26509	1.26509
ASB3	8011.12	0.724291	1	0.843172	-1.186	0.875417	1	0.928769	-1.07669
ASB5	96	0.00352284	0.0603016	6.49187	6.49187	0.141289	0.931321	2.41208	2.41208
ASB6	18588	0.894239	1	1.05457	1.05457	0.85752	1	0.928593	-1.0769
ASB7	11346	0.981893	1	1.0126	1.0126	0.751873	1	1.18241	1.18241
ASB8	16019	0.631573	1	1.16626	1.16626	0.840198	1	0.933991	-1.07067
ASB9	16.1868	0.310266	1	76.0431	76.0431	0.0751465	0.658167	257.615	257.615
ASB9P1	144.813	0.998092	1	1.00624	1.00624	0.92336	1	0.766942	-1.30388
ASCC1	11862.9	0.317062	1	1.56569	1.56569	0.45282	1	1.40998	1.40998
ASCC2	27320.1	0.616813	1	1.14285	1.14285	0.537994	1	1.17729	1.17729
ASCC3	54617.1	0.256004	1	1.493	1.493	0.63097	1	1.19444	1.19444
ASCL1	5903	0.0910393	0.661915	233.498	233.498	0.565249	1	7.21597	7.21597
ASCL2	10	0.0665795	0.541147	216.32	216.32	0.320846	1	40.9439	40.9439
ASCL3	51	0.186987	0.946208	0.389065	-2.57027	0.79548	1	0.822042	-1.21648
ASCL5	56	0.784251	1	0.84404	-1.18478	0.920523	1	1.06649	1.06649
ASF1A	20527	0.859423	1	1.04956	1.04956	0.448007	1	0.800622	-1.24903
ASF1B	40465	0.439834	1	0.880136	-1.13619	0.263821	1	0.82886	-1.20648
ASGR1	173	0.544025	1	2.29922	2.29922	0.262815	1	4.22501	4.22501
ASH1L	57877	0.984461	1	1.00723	1.00723	0.909947	1	1.04235	1.04235
ASH1L-AS1	1951.52	0.852094	1	0.855842	-1.16844	0.96174	1	1.03884	1.03884
ASH2L	49004.2	0.838676	1	0.957485	-1.0444	0.426065	1	1.17537	1.17537
ASIC1	28311.1	0.164753	0.891464	1.60546	1.60546	0.481688	1	1.28526	1.28526
ASIC2	31	0.0101159	0.138784	10.9023	10.9023	0.0688268	0.619037	3.35072	3.35072
ASIC3	975	0.801785	1	0.87948	-1.13704	0.822844	1	0.891964	-1.12112
ASIC4	22	0.712819	1	0.699767	-1.42905	0.391696	1	0.636733	-1.57052
ASIC5	25	0.105245	0.71607	0.062154	-16.0891	0.402168	1	0.236136	-4.23485
ASIP	117	0.812237	1	0.701078	-1.42637	0.807441	1	0.695169	-1.4385
ASL	5848.01	1.09239e-27	2.91052e-25	1.22553	1.22553	4.88009e-141	2.99052e-137	1.87155	1.87155
ASMT	15.0152	0.500283	1	2.1633	2.1633	0.45189	1	1.79842	1.79842
ASMTL	13699.1	0.945515	1	1.03395	1.03395	0.618299	1	1.26157	1.26157
ASMTL-AS1	3936.94	0.875984	1	0.849168	-1.17762	0.880025	1	1.15742	1.15742
ASNA1	27679	0.32056	1	1.19098	1.19098	0.557299	1	1.11066	1.11066
ASNS	69429.7	0.00237708	0.0440083	1.69586	1.69586	3.77162e-05	0.00148793	2.0049	2.0049
ASNSD1	31971	0.365877	1	1.21821	1.21821	0.543365	1	0.865601	-1.15527
ASPDH	56	0.441122	1	1.56495	1.56495	0.393462	1	1.74547	1.74547
ASPH	55137.6	0.390726	1	0.745769	-1.3409	0.52587	1	0.809094	-1.23595
ASPHD1	2405	0.381735	1	2.10278	2.10278	0.0763495	0.665533	3.99983	3.99983
ASPHD2	6090	0.60068	1	1.30456	1.30456	0.706077	1	1.21487	1.21487
ASPM	159807	0.371204	1	0.825246	-1.21176	0.739189	1	0.933131	-1.07166
ASPN	83	0.000269784	0.00724045	3.76435	3.76435	0.0146667	0.209832	2.33395	2.33395
ASPRV1	472	0.138557	0.81931	1.26694	1.26694	0.0041898	0.0801652	0.602145	-1.66073
ASPSCR1	9106.03	0.934739	1	0.96878	-1.03223	0.812846	1	0.911032	-1.09766
ASRGL1	28601.9	0.00284121	0.0504664	0.470811	-2.124	0.092358	0.743068	0.686056	-1.45761
ASS1	6712.05	0.761847	1	0.8818	-1.13404	0.563992	1	0.780697	-1.28091
ASTE1	4510.24	0.819902	1	0.861861	-1.16028	0.9841	1	0.987498	-1.01266
ASTL	29	0.88229	1	0.539841	-1.8524	0.707189	1	0.326394	-3.06379
ASTN1	45	0.45763	1	0.449974	-2.22235	0.490881	1	2.84232	2.84232
ASTN2	5188	0.587154	1	0.88483	-1.13016	0.0787486	0.67756	0.655718	-1.52505
ASUN	35537	0.258839	1	1.308	1.308	0.515126	1	1.17189	1.17189
ASXL1	81026.2	0.981318	1	0.994284	-1.00575	0.897713	1	0.968822	-1.03218
ASXL2	52495	0.615312	1	1.17969	1.17969	0.0986332	0.769967	1.65845	1.65845
ASXL3	276	0.00338136	0.0585339	8.37823	8.37823	0.620535	1	0.764497	-1.30805
ATAD1	33423	0.896745	1	1.03159	1.03159	0.644891	1	0.891692	-1.12146
ATAD2	113152	0.0359883	0.35691	0.682155	-1.46594	0.239695	1	0.815673	-1.22598
ATAD2B	22080.9	0.87385	1	1.08007	1.08007	0.979991	1	0.987647	-1.01251
ATAD3A	59729.4	0.954776	1	0.990289	-1.00981	0.388405	1	0.857181	-1.16662
ATAD3B	53201.7	0.850941	1	1.03266	1.03266	0.584665	1	0.907947	-1.10139
ATAD3C	1149.34	0.751281	1	1.31988	1.31988	0.237097	1	2.54962	2.54962
ATAD5	28189	0.667361	1	0.849573	-1.17706	0.679601	1	0.855231	-1.16928
ATAT1	9847.99	0.25665	1	0.719561	-1.38974	0.313027	1	0.7466	-1.3394
ATCAY	84.1699	0.261037	1	0.650137	-1.53814	0.632724	1	1.29952	1.29952
ATE1	17804.8	0.803418	1	0.913669	-1.09449	0.951875	1	0.978968	-1.02148
ATE1-AS1	244.229	0.869766	1	0.87494	-1.14294	0.822564	1	0.827251	-1.20882
ATF1	8833	0.77247	1	0.884911	-1.13006	0.629767	1	0.811677	-1.23202
ATF2	27600	0.988708	1	0.996126	-1.00389	0.985003	1	1.00534	1.00534
ATF3	8364.03	0.147424	0.844985	2.24414	2.24414	0.0327717	0.378268	3.12184	3.12184
ATF4	185025	0.962649	1	1.00405	1.00405	0.398192	1	1.07444	1.07444
ATF5	20350.3	0.504764	1	1.20848	1.20848	0.833531	1	0.938534	-1.06549
ATF6	25636	0.834231	1	0.940296	-1.06349	0.919014	1	0.970605	-1.03029
ATF6B	32319.8	0.902569	1	0.943792	-1.05956	0.732866	1	1.16574	1.16574
ATF7	20435.7	0.513238	1	1.38886	1.38886	0.554832	1	1.34794	1.34794
ATF7IP	70241.3	0.133316	0.806298	1.63727	1.63727	0.175602	1	1.56621	1.56621
ATF7IP2	4688.99	0.676356	1	1.27089	1.27089	0.653055	1	1.29354	1.29354
ATG10	5248.03	0.832729	1	0.883616	-1.13171	0.677224	1	1.25114	1.25114
ATG101	11948	0.626798	1	1.14564	1.14564	0.999845	1	1.00006	1.00006
ATG12	28103.1	0.375804	1	1.17741	1.17741	0.808876	1	1.0468	1.0468
ATG13	32446.5	0.912638	1	0.978902	-1.02155	0.904268	1	1.02326	1.02326
ATG14	12148	0.627703	1	1.16636	1.16636	0.786735	1	1.09113	1.09113
ATG16L1	14092	0.594411	1	1.23663	1.23663	0.870021	1	1.06984	1.06984
ATG16L2	2602	0.585789	1	1.56813	1.56813	0.35657	1	2.06395	2.06395
ATG2A	18614	0.734038	1	1.14664	1.14664	0.767118	1	1.12711	1.12711
ATG2B	40937	0.813397	1	1.10639	1.10639	0.814701	1	1.10561	1.10561
ATG3	30225.9	0.90075	1	1.03307	1.03307	0.822256	1	1.05997	1.05997
ATG4A	6936.96	0.572239	1	1.31343	1.31343	0.58612	1	1.30132	1.30132
ATG4B	21770.9	0.79852	1	1.07623	1.07623	0.608467	1	0.855273	-1.16922
ATG4C	10572	0.721746	1	1.15469	1.15469	0.996476	1	1.00189	1.00189
ATG4D	15717	0.791371	1	1.08027	1.08027	0.973876	1	1.00976	1.00976
ATG5	16374.9	0.975596	1	1.01123	1.01123	0.824315	1	0.920316	-1.08658
ATG7	10218.1	0.852812	1	1.1133	1.1133	0.812192	1	1.14627	1.14627
ATG9A	32038.7	2.17992e-14	2.68964e-12	1.22101	1.22101	1.43914e-05	0.00063292	1.12123	1.12123
ATG9B	623.929	0.958436	1	1.09422	1.09422	0.836702	1	1.42371	1.42371
ATHL1	9531	0.525871	1	1.40855	1.40855	0.15831	0.98921	2.0369	2.0369
ATIC	83687	0.834065	1	1.02715	1.02715	0.914714	1	0.986263	-1.01393
ATL1	5040.02	0.727291	1	0.809357	-1.23555	0.664673	1	0.765651	-1.30608
ATL2	39269	2.87067e-40	1.31936e-37	0.894636	-1.11777	5.85563e-29	1.60672e-26	0.91414	-1.09392
ATL3	45511.3	0.493379	1	1.2685	1.2685	0.301206	1	1.41972	1.41972
ATM	59757	0.75914	1	1.12601	1.12601	0.7466	1	1.13302	1.13302
ATMIN	46827.2	0.808097	1	0.937579	-1.06658	0.580523	1	0.860715	-1.16183
ATN1	82396.6	0.188745	0.950394	0.825903	-1.2108	0.167602	1	0.817593	-1.2231
ATOH1	382	0.0105751	0.143478	0.721151	-1.38667	8.06285e-23	1.59384e-20	0.214375	-4.66472
ATOH8	32	0.478969	1	3.69547	3.69547	0.955404	1	1.46054	1.46054
ATOX1	11641	0.0762864	0.591252	1.36783	1.36783	0.0168495	0.233254	1.51241	1.51241
ATP10A	32879	0.0532401	0.46453	0.445007	-2.24716	0.135941	0.910913	1.55902	1.55902
ATP10D	88635	0.00806992	0.11645	0.561272	-1.78167	0.00539266	0.0972902	0.541308	-1.84738
ATP11A	47905.3	0.940118	1	1.02719	1.02719	0.748067	1	1.11893	1.11893
ATP11A-AS1	66	0.876164	1	0.799461	-1.25084	0.677678	1	0.683142	-1.46383
ATP11AUN	14	0.185366	0.941567	2.06486	2.06486	0.379162	1	1.44949	1.44949
ATP11B	36054	0.478061	1	1.29963	1.29963	0.695984	1	1.15962	1.15962
ATP11C	128456	0.369404	1	0.842133	-1.18746	0.128211	0.885769	1.2994	1.2994
ATP12A	33	0.0414887	0.393564	0.220985	-4.52519	0.128364	0.886492	0.431568	-2.31713
ATP13A1	48616	0.396575	1	1.21542	1.21542	0.674477	1	1.10388	1.10388
ATP13A2	40870	0.587491	1	0.860807	-1.1617	0.0670525	0.609641	1.55499	1.55499
ATP13A3	74167	0.691697	1	1.10364	1.10364	0.62407	1	0.878918	-1.13776
ATP13A4	62	0.00924121	0.129985	14.1149	14.1149	0.280746	1	1.70592	1.70592
ATP13A5	85.3126	0.125437	0.781175	1.58014	1.58014	0.204066	1	0.721236	-1.38651
ATP13A5-AS1	63.6874	0.594893	1	3.60498	3.60498	0.955091	1	1.17466	1.17466
ATP1A1	184537	0.213139	1	1.16328	1.16328	0.594674	1	0.934068	-1.07059
ATP1A1-AS1	1499.28	0.509056	1	0.76209	-1.31218	0.70835	1	0.859991	-1.1628
ATP1A2	527.819	0.859378	1	63.0448	63.0448	0.710646	1	0.479475	-2.08562
ATP1A3	29257	0.829753	1	0.935685	-1.06874	0.285307	1	1.3537	1.3537
ATP1A4	65.2254	0.651191	1	29.6135	29.6135	0.603266	1	0.038113	-26.2378
ATP1B1	21126	0.0712628	0.56421	0.587524	-1.70206	0.566241	1	1.15102	1.15102
ATP1B2	2766	0.601236	1	1.6083	1.6083	0.805285	1	1.26552	1.26552
ATP1B3	78137	0.0168733	0.204887	1.34044	1.34044	0.850677	1	0.975446	-1.02517
ATP2A1	9829.88	0.00116179	0.0247776	15.3855	15.3855	0.920343	1	0.888445	-1.12556
ATP2A2	245818	0.835699	1	1.0316	1.0316	0.876714	1	1.02359	1.02359
ATP2A3	5644.14	0.425948	1	0.509639	-1.96217	0.979215	1	0.981945	-1.01839
ATP2B1	42710.6	0.734906	1	0.888981	-1.12488	0.50234	1	1.23983	1.23983
ATP2B2	44	0.680536	1	0.819039	-1.22094	0.965337	1	1.0745	1.0745
ATP2B3	36	0.00118699	0.0251085	2.39344	2.39344	0.0186042	0.25038	0.717048	-1.39461
ATP2B4	48581.3	0.558739	1	1.27472	1.27472	0.016574	0.231005	2.42298	2.42298
ATP2C1	69919	0.713796	1	0.915915	-1.0918	0.546378	1	0.863534	-1.15803
ATP2C2	79	0.134126	0.808186	1.7437	1.7437	0.98234	1	1.00663	1.00663
ATP4A	189	0.942317	1	0.900356	-1.11067	0.384754	1	2.17232	2.17232
ATP5A1	376384	0.0114003	0.151871	1.18173	1.18173	0.064996	0.597245	1.13092	1.13092
ATP5B	529028	0.0149885	0.186434	1.12549	1.12549	0.0193358	0.257214	1.12051	1.12051
ATP5C1	85167.3	0.37024	1	1.08826	1.08826	0.675089	1	1.04081	1.04081
ATP5D	47334.6	0.00844475	0.121088	1.36416	1.36416	0.421434	1	1.1045	1.1045
ATP5E	67902.2	0.634845	1	1.03372	1.03372	1.19711e-07	7.21565e-06	1.41134	1.41134
ATP5EP2	6237.93	0.363557	1	1.2095	1.2095	0.0559847	0.546587	1.46788	1.46788
ATP5F1	99069.6	0.099769	0.695809	1.21924	1.21924	0.162837	0.99953	1.18434	1.18434
ATP5G1	35618.1	0.00116529	0.0248235	1.43298	1.43298	0.135962	0.910913	1.18774	1.18774
ATP5G2	95972.3	0.43328	1	1.07705	1.07705	0.517503	1	1.06343	1.06343
ATP5G3	118699	0.1821	0.933554	1.20411	1.20411	0.648783	1	1.06739	1.06739
ATP5H	43894	0.122763	0.773297	1.16107	1.16107	0.546512	1	1.06142	1.06142
ATP5I	32436.2	0.639861	1	1.04154	1.04154	0.481813	1	1.06277	1.06277
ATP5J	49964.3	0.919656	1	0.986856	-1.01332	0.960296	1	0.993502	-1.00654
ATP5J2	57829.7	0.515081	1	1.05167	1.05167	0.272607	1	1.08786	1.08786
ATP5J2-PTCD1	7819.17	0.868036	1	1.11711	1.11711	0.918196	1	1.07161	1.07161
ATP5L	64080.3	0.440154	1	1.09636	1.09636	0.945757	1	1.00831	1.00831
ATP5L2	472.583	0.933473	1	1.04608	1.04608	0.889624	1	0.928132	-1.07743
ATP5O	82628	0.201766	0.978947	1.10857	1.10857	0.359482	1	1.07734	1.07734
ATP5S	3921.99	0.624664	1	0.733619	-1.36311	0.988079	1	1.00871	1.00871
ATP5SL	20532.8	0.831005	1	1.0535	1.0535	0.824248	1	1.05571	1.05571
ATP6AP1	79629	0.16856	0.902388	1.20006	1.20006	0.535344	1	1.08764	1.08764
ATP6AP1L	1568	0.880508	1	0.84518	-1.18318	0.615556	1	1.62181	1.62181
ATP6AP2	57913	0.393313	1	1.13795	1.13795	0.931703	1	1.01343	1.01343
ATP6V0A1	28206.2	0.523101	1	1.2306	1.2306	0.0161956	0.227282	2.03312	2.03312
ATP6V0A2	26914.9	0.60021	1	0.894105	-1.11844	0.328335	1	0.807436	-1.23849
ATP6V0B	39730.4	0.645066	1	1.08729	1.08729	0.643002	1	0.915846	-1.09189
ATP6V0C	78354.5	0.285664	1	1.11708	1.11708	0.172284	1	1.15091	1.15091
ATP6V0D1	27233	0.505657	1	1.14944	1.14944	0.220395	1	1.28414	1.28414
ATP6V0E1	23867	0.230433	1	1.20958	1.20958	0.346623	1	1.16264	1.16264
ATP6V0E2	40409.2	0.220147	1	1.293	1.293	0.861486	1	0.96154	-1.04
ATP6V0E2-AS1	2819.36	0.838554	1	1.13194	1.13194	0.786452	1	0.838388	-1.19276
ATP6V1A	74049	0.937184	1	0.983521	-1.01676	0.337373	1	1.21218	1.21218
ATP6V1B1	859	0.750289	1	0.687947	-1.4536	0.739492	1	0.674652	-1.48225
ATP6V1B2	42114	0.475786	1	1.16849	1.16849	0.821004	1	1.05196	1.05196
ATP6V1C1	35846	0.379241	1	1.3183	1.3183	0.838132	1	0.932685	-1.07217
ATP6V1C2	3497.42	0.701689	1	0.778	-1.28535	0.736042	1	0.802886	-1.24551
ATP6V1D	19656	0.276241	1	1.3074	1.3074	0.751353	1	1.0848	1.0848
ATP6V1E1	27801.2	0.509283	1	1.12786	1.12786	0.864989	1	1.03217	1.03217
ATP6V1E2	2801	0.41593	1	1.74981	1.74981	0.43132	1	1.72118	1.72118
ATP6V1F	34449.6	0.0107594	0.145441	1.38163	1.38163	0.188603	1	1.18797	1.18797
ATP6V1G1	34513	0.938535	1	0.986685	-1.01349	0.654198	1	0.923869	-1.0824
ATP6V1G2	538.064	0.35272	1	0.927361	-1.07833	0.0198889	0.262868	1.31599	1.31599
ATP6V1G2-DDX39B	6532.38	6.61109e-08	3.93328e-06	0.70113	-1.42627	0.12006	0.855075	0.904799	-1.10522
ATP6V1H	27803.2	0.642046	1	1.11946	1.11946	0.429074	1	1.2076	1.2076
ATP7A	37925.3	0.0140889	0.17777	2.68016	2.68016	0.746616	1	1.163	1.163
ATP7B	12265.1	0.390573	1	1.73653	1.73653	0.443501	1	1.64471	1.64471
ATP8A1	32139.1	0.600045	1	0.792397	-1.26199	0.645947	1	1.20141	1.20141
ATP8A2	1439	0.72837	1	0.583493	-1.71382	0.850662	1	0.763694	-1.30943
ATP8B1	799.786	0.943281	1	1.18044	1.18044	0.817224	1	1.65335	1.65335
ATP8B2	29734	0.942235	1	1.02758	1.02758	0.940871	1	1.02824	1.02824
ATP8B3	2988	0.913235	1	0.848587	-1.17843	0.335608	1	3.09837	3.09837
ATP8B4	346	0.845084	1	1.08489	1.08489	0.1646	1	1.86342	1.86342
ATP8B5P	1034.32	0.00275765	0.04922	1.49186	1.49186	0.28254	1	1.15753	1.15753
ATP9A	43854	0.332769	1	0.716622	-1.39544	0.623509	1	0.851373	-1.17457
ATP9B	8255	0.87773	1	1.0823	1.0823	0.839296	1	1.10923	1.10923
ATPAF1	34493.8	0.742221	1	1.06763	1.06763	0.667755	1	0.915043	-1.09284
ATPAF2	5494	2.50959e-14	3.07575e-12	1.40496	1.40496	1.00165e-06	5.29148e-05	1.24758	1.24758
ATPIF1	40338.2	0.632501	1	0.918909	-1.08825	0.653848	1	0.923864	-1.08241
ATR	42148	0.26318	1	1.30383	1.30383	0.557974	1	1.1532	1.1532
ATRAID	24660.4	0.867343	1	0.968051	-1.033	0.974703	1	1.00612	1.00612
ATRIP	11362.6	0.880552	1	1.06386	1.06386	0.702789	1	0.846486	-1.18135
ATRN	42224.6	0.707473	1	1.15359	1.15359	0.548701	1	1.25127	1.25127
ATRNL1	1312	0.00856007	0.12237	15.2567	15.2567	0.341106	1	3.00136	3.00136
ATRX	129819	0.773428	1	0.933721	-1.07098	0.758134	1	0.929188	-1.07621
ATXN1	4633.39	0.455795	1	2.87714	2.87714	0.596542	1	2.18206	2.18206
ATXN10	70951.6	0.167351	0.899323	0.788579	-1.2681	0.0785084	0.676652	0.73429	-1.36186
ATXN1L	32460	0.78869	1	1.00208	1.00208	0.253211	1	1.00887	1.00887
ATXN2	43055.5	0.155407	0.866281	1.46758	1.46758	0.623758	1	1.14989	1.14989
ATXN2L	134399	0.522043	1	1.09969	1.09969	0.5974	1	1.08188	1.08188
ATXN3	13364.4	0.639642	1	0.752364	-1.32914	0.923691	1	0.946773	-1.05622
ATXN7	25022.1	0.894542	1	1.06221	1.06221	0.766227	1	1.1423	1.1423
ATXN7L1	5150	0.997277	1	0.99674	-1.00327	0.903168	1	1.10414	1.10414
ATXN7L2	5255	0.756449	1	1.19271	1.19271	0.625435	1	1.31202	1.31202
ATXN7L3	35359.9	0.478965	1	0.834797	-1.1979	0.365585	1	0.791203	-1.2639
ATXN7L3B	58283	0.05069	0.448885	0.798298	-1.25267	0.00154094	0.0356335	0.683342	-1.4634
ATXN8OS	18.5885	0.904594	1	0.791087	-1.26408	0.194886	1	0.315749	-3.16707
AUH	6215	0.73766	1	0.871705	-1.14718	0.829278	1	0.916474	-1.09114
AUNIP	10191.1	0.518409	1	0.773707	-1.29248	0.680057	1	0.852566	-1.17293
AUP1	42772.2	0.127253	0.786887	1.2748	1.2748	0.37534	1	1.15525	1.15525
AURKA	69363.1	0.419308	1	1.13797	1.13797	0.223305	1	1.21178	1.21178
AURKAIP1	49465.6	0.0829703	0.623593	1.23875	1.23875	0.602894	1	1.06875	1.06875
AURKAPS1	1538.77	0.962698	1	1.0379	1.0379	0.96509	1	1.03535	1.03535
AURKB	40471.1	0.0731009	0.573463	0.756422	-1.32201	0.28916	1	1.15936	1.15936
AUTS2	25368.2	0.294283	1	0.667846	-1.49735	0.0172443	0.237112	0.298018	-3.3555
AVEN	3989	0.387284	1	0.645013	-1.55036	0.538262	1	0.741114	-1.34932
AVIL	480.656	0.994714	1	0.987388	-1.01277	0.922841	1	0.846261	-1.18167
AVL9	12723	0.831754	1	1.07885	1.07885	0.67685	1	1.15769	1.15769
AVPI1	3661	0.772159	1	0.854773	-1.1699	0.542228	1	1.34456	1.34456
AVPR1A	22	0.2571	1	2.07483	2.07483	0.773165	1	1.32812	1.32812
AVPR2	60	0.68623	1	0.753483	-1.32717	0.426815	1	1.64239	1.64239
AWAT2	13	0.359077	1	3.89433	3.89433	0.952197	1	1.42299	1.42299
AXDND1	113	0.662451	1	1.10372	1.10372	0.938715	1	1.03398	1.03398
AXIN1	34135.7	0.486937	1	0.844988	-1.18345	0.874173	1	0.963618	-1.03776
AXIN2	6150	0.49739	1	0.625004	-1.59999	0.768438	1	0.828668	-1.20676
AXL	386	0.970378	1	1.10614	1.10614	0.513906	1	4.43311	4.43311
AZGP1	11	0.041371	0.392919	0.00285804	-349.89	0.112343	0.829608	0.0862906	-11.5887
AZI2	16501.1	0.90281	1	0.962639	-1.03881	0.600878	1	0.844701	-1.18385
AZIN1	86056.5	0.797449	1	0.955251	-1.04684	0.543314	1	0.895599	-1.11657
AZIN2	1511	0.6294	1	0.667267	-1.49865	0.886305	1	0.895183	-1.11709
AZU1	121	8.41885e-08	4.9134e-06	3.16028	3.16028	4.36708e-07	2.43682e-05	2.95712	2.95712
B2M	125033	0.145759	0.842125	1.11521	1.11521	0.00109108	0.0264972	1.26836	1.26836
B3GALNT1	10	0.430287	1	2.86615	2.86615	0.953443	1	0.749082	-1.33497
B3GALNT2	35051.8	0.00149335	0.0301358	0.733439	-1.36344	0.782618	1	1.02535	1.02535
B3GALT1	1718	0.147971	0.845602	4.90335	4.90335	0.734018	1	1.54755	1.54755
B3GALT2	761	0.773111	1	1.18613	1.18613	0.108024	0.811518	0.0914253	-10.9379
B3GALT4	291	0.117796	0.757203	0.671514	-1.48917	0.0675006	0.611597	1.6427	1.6427
B3GALT6	16595	0.557361	1	1.20473	1.20473	0.482293	1	0.779505	-1.28286
B3GALTL	7692	0.999963	1	0.999971	-1.00003	0.644619	1	0.75399	-1.32628
B3GAT1	2916	0.663103	1	0.683523	-1.46301	0.494948	1	0.52349	-1.91026
B3GAT2	1876.72	0.460372	1	597.879	597.879	0.567852	1	142.73	142.73
B3GAT3	27004.1	0.909767	1	1.02688	1.02688	0.696167	1	0.910064	-1.09882
B3GNT1	24712	0.233072	1	1.3172	1.3172	0.996875	1	1.00096	1.00096
B3GNT2	7381	0.419251	1	0.741289	-1.349	0.970222	1	0.987378	-1.01278
B3GNT4	962	0.966236	1	0.951304	-1.05119	0.513892	1	1.93958	1.93958
B3GNT5	33388	0.655631	1	1.12822	1.12822	0.4501	1	0.800062	-1.2499
B3GNT7	75	0.0515675	0.454902	0.494216	-2.0234	0.0131879	0.195284	2.47146	2.47146
B3GNT8	72	0.732284	1	0.834719	-1.19801	0.52285	1	0.700297	-1.42797
B3GNT9	903.016	0.185189	0.941253	1.32502	1.32502	0.648989	1	1.10319	1.10319
B3GNTL1	1889	0.126496	0.784831	1.23449	1.23449	8.97913e-06	0.000408595	1.7865	1.7865
B4GALNT1	14023.1	0.333143	1	1.52605	1.52605	0.604255	1	1.26542	1.26542
B4GALNT2	15	1	1	1	-1	0.00069193	0.018489	314.313	314.313
B4GALNT3	9226	0.257483	1	0.643641	-1.55366	0.133844	0.906959	0.540354	-1.85064
B4GALNT4	23962	0.233102	1	0.692384	-1.44429	0.332134	1	0.746365	-1.33983
B4GALT1	20830.7	0.587022	1	1.23311	1.23311	0.287648	1	1.48349	1.48349
B4GALT1-AS1	33.3513	0.393643	1	0.692157	-1.44476	0.803976	1	0.907675	-1.10172
B4GALT2	39165.2	0.805937	1	1.04951	1.04951	0.477763	1	0.863476	-1.15811
B4GALT3	21385	0.406555	1	1.25657	1.25657	0.672219	1	1.12678	1.12678
B4GALT4	10461.5	0.900181	1	0.953798	-1.04844	0.50536	1	1.26484	1.26484
B4GALT4-AS1	58.5313	0.878953	1	0.774191	-1.29167	0.913377	1	0.853213	-1.17204
B4GALT5	48636.8	0.787195	1	1.07364	1.07364	0.399687	1	1.23912	1.23912
B4GALT6	22452	0.954192	1	0.974887	-1.02576	0.0635078	0.590184	2.02468	2.02468
B4GALT7	7166	0.560719	1	1.26307	1.26307	0.767755	1	1.12932	1.12932
B9D1	7312.59	0.292048	1	1.59767	1.59767	0.12802	0.885114	1.92389	1.92389
B9D2	1660.77	0.870786	1	1.10704	1.10704	0.899425	1	0.920599	-1.08625
BAALC	475	3.45549e-12	3.47136e-10	0.0665015	-15.0373	8.91293e-12	8.27552e-10	0.0847699	-11.7966
BAALC-AS1	17	0.82956	1	1.04035	1.04035	0.283117	1	0.398531	-2.50922
BAALCOS	10	0.685339	1	0.556369	-1.79737	0.981282	1	0.906152	-1.10357
BAAT	89	0.515005	1	1.59578	1.59578	0.243751	1	0.487231	-2.05242
BABAM1	32013	0.863208	1	0.969823	-1.03112	0.821417	1	1.04024	1.04024
BACE1	41069.2	0.718011	1	1.1127	1.1127	0.959937	1	1.0153	1.0153
BACE1-AS	1430.43	0.782838	1	1.18005	1.18005	0.983957	1	1.0126	1.0126
BACE2	262	0.00329681	0.0575034	74.3922	74.3922	0.0208363	0.272443	8.88189	8.88189
BACH1	17017.1	0.892153	1	0.935049	-1.06946	0.661971	1	0.797715	-1.25358
BACH1-IT2	30	0.770566	1	1.66196	1.66196	0.942274	1	1.24043	1.24043
BACH2	1290	0.760394	1	0.442666	-2.25904	0.882347	1	1.33625	1.33625
BAD	12215.7	0.918031	1	1.02688	1.02688	0.762982	1	1.07982	1.07982
BAG1	23618	0.895633	1	0.959714	-1.04198	0.323512	1	0.715051	-1.3985
BAG2	24876	0.380749	1	0.813336	-1.2295	0.684705	1	0.911346	-1.09728
BAG3	20234	0.552029	1	1.19182	1.19182	0.541607	1	1.19712	1.19712
BAG4	27213	0.90168	1	0.959997	-1.04167	0.949726	1	1.02074	1.02074
BAG5	34235.2	0.950256	1	0.980533	-1.01985	0.892876	1	0.958221	-1.0436
BAG6	140690	0.574608	1	0.918441	-1.0888	0.842068	1	0.9706	-1.03029
BAHCC1	22656	0.21033	0.996473	0.4564	-2.19106	0.901442	1	0.939528	-1.06436
BAHD1	34710.4	0.559499	1	1.1907	1.1907	0.758783	1	1.09813	1.09813
BAI1	13658	0.682401	1	0.834803	-1.19789	0.0271945	0.332852	0.199283	-5.01798
BAI2	17260.1	0.839731	1	1.09415	1.09415	0.786046	1	0.880211	-1.13609
BAI3	2990	0.768509	1	1.29361	1.29361	0.493782	1	0.00781074	-128.029
BAIAP2	10257.8	0.684905	1	0.805871	-1.24089	0.919949	1	1.05093	1.05093
BAIAP2-AS1	6254	0.911811	1	1.08248	1.08248	0.682292	1	1.32294	1.32294
BAIAP2L1	17685.2	0.285456	1	0.617915	-1.61834	0.138103	0.917559	1.68442	1.68442
BAIAP2L2	581	0.954307	1	0.917225	-1.09024	0.88999	1	1.20544	1.20544
BAIAP3	546.914	0.816453	1	1.19457	1.19457	0.467736	1	1.6989	1.6989
BAK1	17185	0.666562	1	1.13177	1.13177	0.961524	1	0.98577	-1.01444
BAMBI	1636	0.626702	1	0.681434	-1.46749	0.482821	1	0.554323	-1.804
BANF1	76578.8	0.470869	1	1.07425	1.07425	0.919061	1	1.0103	1.0103
BANK1	97	0.988695	1	0.990676	-1.00941	0.627077	1	0.133997	-7.46286
BANP	7650.06	0.963885	1	0.978617	-1.02185	0.967344	1	0.98062	-1.01976
BAP1	54179	0.600676	1	1.11731	1.11731	0.901333	1	1.02718	1.02718
BARD1	16951.9	0.356219	1	0.657741	-1.52036	0.791348	1	0.895679	-1.11647
BARHL1	22	0.0391774	0.377879	0.418958	-2.38687	0.45732	1	1.28274	1.28274
BARHL2	1037	0.717585	1	1.42305	1.42305	0.901691	1	1.13508	1.13508
BARX1	114	0.979009	1	0.905353	-1.10454	0.686551	1	3.43916	3.43916
BASP1	31575.7	1.94229e-09	1.45743e-07	0.0353107	-28.3201	4.31879e-05	0.00167497	0.477017	-2.09636
BASP1P1	46.0021	0.305489	1	4.23246	4.23246	0.874376	1	0.87184	-1.147
BATF2	82	0.575772	1	1.16939	1.16939	0.0128259	0.191701	2.15243	2.15243
BATF3	3099	0.557801	1	1.26507	1.26507	0.44305	1	0.699139	-1.43033
BAX	20991	0.546455	1	1.12767	1.12767	0.819522	1	0.953739	-1.04851
BAZ1A	85099.3	0.086708	0.641232	0.696508	-1.43573	0.0474172	0.489179	0.652592	-1.53235
BAZ1B	179132	0.809006	1	1.03659	1.03659	0.810484	1	0.964354	-1.03696
BAZ2A	115418	0.604804	1	1.13154	1.13154	0.243724	1	1.30914	1.30914
BAZ2B	25758.9	0.875441	1	1.08023	1.08023	0.517397	1	0.699038	-1.43054
BBC3	5742	0.865628	1	0.912482	-1.09591	0.38003	1	1.52544	1.52544
BBIP1	5793.1	0.235575	1	0.640652	-1.56091	0.308129	1	0.687092	-1.45541
BBS1	10823	0.901526	1	1.05879	1.05879	0.772802	1	1.13995	1.13995
BBS10	12337	0.929829	1	0.963581	-1.0378	0.629972	1	0.808345	-1.2371
BBS12	1815	0.736318	1	1.29196	1.29196	0.857583	1	1.15279	1.15279
BBS2	13105	0.581501	1	1.23204	1.23204	0.444845	1	1.3291	1.3291
BBS4	17926	0.00457638	0.0747842	2.68911	2.68911	0.0872699	0.716877	1.8782	1.8782
BBS5	5321.83	0.176492	0.924394	1.54635	1.54635	0.419223	1	1.30949	1.30949
BBS7	11463	0.867352	1	0.940462	-1.06331	0.964617	1	0.984138	-1.01612
BBS9	3489.01	0.487963	1	0.751022	-1.33152	0.399451	1	0.700921	-1.42669
BBX	77455.3	0.798874	1	1.07368	1.07368	0.832967	1	1.06079	1.06079
BCAM	17195	0.0790527	0.606555	0.477694	-2.09339	0.825738	1	1.07589	1.07589
BCAN	536	0.575585	1	1.79392	1.79392	0.133659	0.906959	4.00532	4.00532
BCAP29	17243	0.261051	1	1.36031	1.36031	0.289192	1	1.33794	1.33794
BCAP31	74244.1	0.260746	1	0.846508	-1.18132	0.829465	1	0.969673	-1.03128
BCAR1	21840.2	0.898952	1	0.951068	-1.05145	0.761445	1	0.884964	-1.12999
BCAR3	1282.48	0.5677	1	2.39762	2.39762	0.682838	1	1.91203	1.91203
BCAS1	88.1129	0.219503	1	1.53498	1.53498	0.0148404	0.211822	2.28733	2.28733
BCAS2	22016	0.787879	1	1.05429	1.05429	0.921602	1	0.980506	-1.01988
BCAS3	3729	0.492158	1	1.24939	1.24939	0.903357	1	0.959464	-1.04225
BCAS4	8810	0.963458	1	1.01539	1.01539	0.532469	1	1.22051	1.22051
BCAT1	169921	0.0559631	0.478979	0.663599	-1.50693	0.611654	1	1.09975	1.09975
BCAT2	24513	0.344876	1	1.25831	1.25831	0.324535	1	1.27017	1.27017
BCCIP	82040.5	0.429986	1	1.13502	1.13502	0.525566	1	0.897633	-1.11404
BCDIN3D	3988.36	0.893553	1	0.911195	-1.09746	0.738928	1	0.785708	-1.27274
BCDIN3D-AS1	1323.65	0.831331	1	0.787627	-1.26964	0.957594	1	0.944329	-1.05895
BCHE	4814	0.338343	1	0.631255	-1.58415	0.0644758	0.595617	0.0207358	-48.2257
BCKDHA	19259.9	0.553208	1	0.859771	-1.1631	0.748558	1	1.08011	1.08011
BCKDHB	15317	0.650836	1	1.19763	1.19763	0.929841	1	1.03696	1.03696
BCKDK	21035	0.498458	1	1.2065	1.2065	0.198748	1	1.41127	1.41127
BCL10	9185.51	0.199235	0.973662	1.04542	1.04542	0.000499386	0.0140593	1.12732	1.12732
BCL11A	11763	0.780697	1	0.84036	-1.18997	0.595041	1	0.705477	-1.41748
BCL11B	3951	0.952692	1	0.942612	-1.06088	0.377992	1	0.260373	-3.84065
BCL2	6604.99	0.366728	1	0.44145	-2.26526	0.764858	1	0.798434	-1.25245
BCL2A1	14.0012	0.230718	1	11.7163	11.7163	0.993579	1	0.954348	-1.04784
BCL2L1	21553.9	0.702497	1	1.11712	1.11712	0.419955	1	1.25568	1.25568
BCL2L10	16	0.837989	1	0.535694	-1.86674	0.52211	1	0.404729	-2.47079
BCL2L11	11953.3	0.974362	1	0.981637	-1.01871	0.856958	1	0.899067	-1.11226
BCL2L12	18835.8	0.258741	1	1.34737	1.34737	0.386633	1	1.26095	1.26095
BCL2L13	32115.3	0.991169	1	1.00205	1.00205	0.455069	1	1.14304	1.14304
BCL2L14	128	0.950737	1	1.14945	1.14945	0.60087	1	2.08953	2.08953
BCL2L15	343	0.783968	1	0.931527	-1.07351	0.0876194	0.717568	0.63574	-1.57297
BCL2L2	17710.2	0.74727	1	1.07939	1.07939	0.762944	1	1.07401	1.07401
BCL2L2-PABPN1	76650.4	0.115532	0.750167	0.807564	-1.23829	0.286324	1	0.867622	-1.15258
BCL3	3238	0.578317	1	0.66196	-1.51066	0.346332	1	1.73945	1.73945
BCL6	7087.94	0.761966	1	0.784159	-1.27525	0.136544	0.912146	2.54701	2.54701
BCL6B	60	0.53711	1	0.798476	-1.25239	0.300737	1	1.55177	1.55177
BCL7A	29054.9	0.983545	1	0.994565	-1.00546	0.310016	1	0.749192	-1.33477
BCL7B	13132	0.557669	1	1.208	1.208	0.84441	1	1.06728	1.06728
BCL7C	15664.8	0.693088	1	1.12797	1.12797	0.701311	1	1.12426	1.12426
BCL9	40248	0.781163	1	0.917728	-1.08965	0.485081	1	0.799369	-1.25099
BCL9L	15814.9	0.486747	1	1.56977	1.56977	0.206586	1	2.16782	2.16782
BCLAF1	201337	0.401763	1	0.87992	-1.13647	0.295938	1	0.851398	-1.17454
BCO1	666	0.403212	1	0.346015	-2.89005	0.868835	1	0.854982	-1.16962
BCO2	175	0.6457	1	1.07797	1.07797	0.0620231	0.581455	0.731711	-1.36666
BCOR	99854.3	0.484536	1	0.858616	-1.16467	0.798735	1	1.05417	1.05417
BCORL1	169871	0.289567	1	0.824092	-1.21346	0.0480295	0.493811	1.37579	1.37579
BCR	17523.6	0.596772	1	1.31479	1.31479	0.73254	1	1.19782	1.19782
BCRP2	805.072	0.638342	1	1.8927	1.8927	0.875893	1	1.25737	1.25737
BCRP3	247.847	0.950714	1	1.11915	1.11915	0.986151	1	1.03242	1.03242
BCS1L	19174	0.147698	0.845555	1.42044	1.42044	0.753474	1	1.08423	1.08423
BCYRN1	15	0.316259	1	1.07797	1.07797	1.21941e-05	0.000541488	1.58644	1.58644
BDH1	14136	0.711615	1	0.856013	-1.16821	0.909287	1	0.954503	-1.04767
BDH2	7517	0.24912	1	0.559017	-1.78886	0.253443	1	0.562661	-1.77727
BDNF	40.9495	0.341126	1	0.653178	-1.53098	0.972207	1	0.977916	-1.02258
BDNF-AS	183.051	0.946568	1	1.15644	1.15644	0.839919	1	0.742553	-1.34671
BDP1	61364	0.630909	1	1.18075	1.18075	0.849248	1	1.0696	1.0696
BEAN1	59	0.0845977	0.631443	2.04629	2.04629	0.0277625	0.337781	2.39681	2.39681
BECN1	20683.6	0.982664	1	1.00576	1.00576	0.856144	1	1.04859	1.04859
BEGAIN	287	0.00932297	0.130735	0.330234	-3.02815	0.732479	1	1.11633	1.11633
BEND3	27674.9	0.420011	1	1.37918	1.37918	0.784962	1	1.12068	1.12068
BEND3P3	3555.58	0.865401	1	0.840528	-1.18973	0.806325	1	0.773207	-1.29331
BEND4	58429.2	0.509994	1	0.800469	-1.24927	0.554529	1	1.1976	1.1976
BEND5	662	0.219835	1	0.203139	-4.92273	0.194	1	0.094782	-10.5505
BEND6	620	0.953134	1	0.905699	-1.10412	0.949998	1	0.900099	-1.11099
BEND7	5184	0.895277	1	1.08438	1.08438	0.951914	1	0.962495	-1.03897
BEST1	140.023	0.0516624	0.45551	1.46655	1.46655	3.54437e-05	0.00141038	2.24605	2.24605
BEST2	46	0.561451	1	0.789094	-1.26728	0.900363	1	0.987596	-1.01256
BEST4	57	0.852286	1	1.09779	1.09779	0.809282	1	1.19936	1.19936
BET1	8893	0.811747	1	0.898997	-1.11235	0.775788	1	0.87986	-1.13654
BET1L	22596.9	0.426623	1	1.27144	1.27144	0.452828	1	1.25535	1.25535
BEX1	10	0.975191	1	1.29513	1.29513	0.971278	1	0.741418	-1.34877
BEX2	39	0.711292	1	0.359541	-2.78132	0.47818	1	0.0600192	-16.6613
BEX4	18701	0.124595	0.77857	0.707657	-1.41311	0.970422	1	1.00761	1.00761
BEX5	3918.99	0.449547	1	0.732344	-1.36548	0.524836	1	0.772596	-1.29434
BFAR	47297	0.359199	1	1.21441	1.21441	0.299113	1	1.24456	1.24456
BFSP1	5545.04	0.0511829	0.452269	3.65324	3.65324	0.751548	1	1.2823	1.2823
BGLAP	80.5822	0.725636	1	0.420147	-2.38012	0.965998	1	1.08431	1.08431
BGN	178	0.58247	1	163.237	163.237	0.974173	1	0.752071	-1.32966
BHLHB9	8400	0.744747	1	0.834339	-1.19855	0.611928	1	0.747433	-1.33791
BHLHE22	1558	0.346601	1	0.00798004	-125.313	0.473294	1	0.00338685	-295.259
BHLHE40	12448	0.740985	1	1.2002	1.2002	0.00272615	0.0561856	3.92947	3.92947
BHLHE40-AS1	27	0.000361743	0.00928809	2.67323	2.67323	1.07418e-11	9.87389e-10	9.28876	9.28876
BHLHE41	262	0.85816	1	0.827521	-1.20843	0.623636	1	1.69888	1.69888
BHMT	36.5676	0.393842	1	0.621849	-1.60811	0.456875	1	1.73629	1.73629
BHMT2	17.4324	0.759356	1	1.13423	1.13423	0.863845	1	1.3131	1.3131
BICC1	12010	0.622882	1	0.746034	-1.34042	0.717176	1	1.21005	1.21005
BICD1	17053	0.559972	1	0.804295	-1.24332	0.709702	1	0.872814	-1.14572
BICD2	42188.1	0.805674	1	0.925102	-1.08096	0.841553	1	0.938933	-1.06504
BID	12748.9	0.812597	1	1.0905	1.0905	0.873035	1	0.941226	-1.06244
BIK	1453	0.914331	1	0.926962	-1.07879	0.493448	1	1.53871	1.53871
BIN1	11552	0.12394	0.775529	0.544254	-1.83738	0.464607	1	0.770744	-1.29745
BIN3	7675	0.909319	1	0.956942	-1.045	0.597554	1	0.807837	-1.23787
BIN3-IT1	189	0.926411	1	1.18811	1.18811	0.973722	1	0.941643	-1.06197
BIRC2	23072.1	0.47384	1	1.25314	1.25314	0.696401	1	1.13393	1.13393
BIRC3	710.032	0.661122	1	3.36832	3.36832	0.577669	1	4.41977	4.41977
BIRC5	99851	0.440306	1	1.10587	1.10587	0.445958	1	0.900659	-1.1103
BIRC6	101526	0.831861	1	0.934408	-1.0702	0.874702	1	0.951079	-1.05144
BIVM	23905.3	0.575321	1	1.20175	1.20175	0.818126	1	1.0804	1.0804
BIVM-ERCC5	15390.8	0.781735	1	1.13303	1.13303	0.593573	1	1.26471	1.26471
BLACAT1	14	0.00645618	0.0974469	0.0111007	-90.084	0.640296	1	1.73974	1.73974
BLCAP	14220.1	0.936267	1	0.973015	-1.02773	0.870674	1	0.945438	-1.05771
BLK	69	2.19699e-06	0.000104908	935.109	935.109	3.67232e-06	0.000175812	319.262	319.262
BLM	31795.7	0.0754354	0.586139	0.768872	-1.30061	0.122599	0.867199	0.797594	-1.25377
BLMH	54828	0.0991918	0.693456	1.32038	1.32038	0.469869	1	0.874108	-1.14402
BLOC1S1	9695.6	0.802765	1	1.06847	1.06847	0.415883	1	1.23209	1.23209
BLOC1S1-RDH5	673.301	0.71182	1	1.45668	1.45668	0.740475	1	0.663169	-1.50791
BLOC1S2	15184	0.617611	1	1.19728	1.19728	0.76044	1	1.1182	1.1182
BLOC1S3	7579	0.944861	1	0.969274	-1.0317	0.825349	1	1.10148	1.10148
BLOC1S4	7892	0.945496	1	0.9755	-1.02512	0.933264	1	1.03044	1.03044
BLOC1S5	2450.02	0.845343	1	0.852465	-1.17307	0.605489	1	0.630495	-1.58606
BLOC1S5-TXNDC5	8065.95	0.933753	1	1.04404	1.04404	0.942511	1	0.962563	-1.03889
BLOC1S6	50586	0.267806	1	1.2761	1.2761	0.833998	1	1.04943	1.04943
BLVRA	20624.6	0.553729	1	0.891616	-1.12156	0.66823	1	0.920974	-1.08581
BLVRB	10895	0.922756	1	0.97662	-1.02394	0.141467	0.93203	1.39178	1.39178
BLZF1	6306	0.900728	1	0.94188	-1.06171	0.992947	1	0.995821	-1.0042
BMF	5198	0.520939	1	0.596469	-1.67653	0.792851	1	0.825171	-1.21187
BMI1	28348.8	0.64615	1	0.884847	-1.13014	0.445935	1	0.812294	-1.23108
BMP1	12894	0.351331	1	1.20035	1.20035	0.702381	1	1.0799	1.0799
BMP2	1791	0.280876	1	0.336249	-2.97399	0.301705	1	0.0159887	-62.544
BMP2K	9664.2	0.835133	1	1.11989	1.11989	0.966019	1	1.02396	1.02396
BMP3	13	0.0858498	0.63794	0.103793	-9.63453	0.0335515	0.383351	0.0106452	-93.9393
BMP4	3953.01	0.162382	0.884514	0.313574	-3.18904	0.526519	1	1.39982	1.39982
BMP6	628.925	0.977074	1	0.945344	-1.05782	0.832083	1	1.42209	1.42209
BMP7	8944	0.185426	0.941567	4.55665	4.55665	0.0151492	0.214895	13.6045	13.6045
BMP8A	848.175	0.846235	1	1.22986	1.22986	0.830328	1	0.779522	-1.28284
BMP8B	7939.43	0.794805	1	1.12133	1.12133	0.477459	1	1.35096	1.35096
BMPER	18	0.495746	1	7.10403	7.10403	0.522815	1	0.816647	-1.22452
BMPR1A	27719	0.0547767	0.471891	1.79162	1.79162	0.362544	1	1.33998	1.33998
BMPR1B	4051	0.845531	1	1.1887	1.1887	0.561364	1	0.523294	-1.91097
BMPR2	50815	0.354376	1	1.43223	1.43223	0.942534	1	0.969883	-1.03105
BMS1	72653.7	0.823771	1	1.06159	1.06159	0.915191	1	0.971205	-1.02965
BMS1P17	1684.35	0.845678	1	1.19341	1.19341	0.982929	1	1.02026	1.02026
BMS1P18	1684.35	0.845678	1	1.19341	1.19341	0.982929	1	1.02026	1.02026
BMS1P20	7118.52	0.933474	1	0.964843	-1.03644	0.870241	1	0.931762	-1.07324
BMS1P4	2713.14	0.929474	1	0.941288	-1.06237	0.877845	1	0.899121	-1.1122
BMS1P5	9036.35	0.915262	1	1.08527	1.08527	0.90137	1	0.90505	-1.10491
BMS1P6	5558.58	0.99303	1	1.00924	1.00924	0.982137	1	0.976508	-1.02406
BMX	15	0.261055	1	0.183448	-5.45113	0.222601	1	0.0925444	-10.8056
BNC1	63	0.626443	1	0.853108	-1.17218	0.240988	1	1.7452	1.7452
BNC2	3959	0.522872	1	2.75733	2.75733	0.771708	1	1.64879	1.64879
BNIP1	6094.99	0.76907	1	1.11783	1.11783	0.84281	1	0.92416	-1.08206
BNIP2	28781	0.996589	1	0.999445	-1.00056	0.82731	1	1.02676	1.02676
BNIP3	45428	0.869897	1	0.973562	-1.02716	0.00225998	0.0485368	1.56686	1.56686
BNIP3L	34224	0.18746	0.947297	0.681723	-1.46687	0.25077	1	1.32516	1.32516
BNIPL	578	0.713677	1	1.58525	1.58525	0.980248	1	0.962598	-1.03886
BOC	6544.89	0.612028	1	0.534212	-1.87192	0.0307162	0.361875	5.55062	5.55062
BOD1	37010.4	0.627353	1	1.09234	1.09234	0.625111	1	0.911168	-1.09749
BOD1L1	54391	0.578606	1	0.817289	-1.22356	0.867763	1	0.943446	-1.05994
BOD1L2	117.03	0.118649	0.760453	1.24496	1.24496	0.193391	1	0.835665	-1.19665
BOK	983.062	0.870575	1	0.7522	-1.32943	0.446901	1	2.77478	2.77478
BOK-AS1	14.9379	0.968748	1	0.77075	-1.29744	0.346121	1	3.11423	3.11423
BOLA1	95	0.825038	1	1.74592	1.74592	0.851554	1	1.61935	1.61935
BOLA2	10465.4	0.592597	1	1.20678	1.20678	0.978616	1	1.00986	1.00986
BOLA2B	10465.4	0.592597	1	1.20678	1.20678	0.978616	1	1.00986	1.00986
BOLA3	14283.1	0.0304493	0.316796	1.40038	1.40038	0.702627	1	0.936844	-1.06741
BOLA3-AS1	4842	0.762209	1	1.26413	1.26413	0.656291	1	1.401	1.401
BOLL	25	0.908908	1	0.876655	-1.1407	0.201476	1	2.15328	2.15328
BOP1	74978	0.389357	1	1.13208	1.13208	0.859472	1	1.02647	1.02647
BORA	17791.2	0.478252	1	1.27499	1.27499	0.844099	1	1.07265	1.07265
BPGM	9670.99	0.372034	1	1.4316	1.4316	0.510127	1	1.30968	1.30968
BPHL	10304.1	0.604213	1	1.05693	1.05693	0.251092	1	0.879982	-1.13639
BPNT1	13448	0.214296	1	1.54675	1.54675	0.745603	1	1.12967	1.12967
BPTF	117076	0.677833	1	0.898887	-1.11249	0.96643	1	1.01054	1.01054
BRAF	6557	0.808048	1	1.14539	1.14539	0.735536	1	1.20507	1.20507
BRAP	16391	0.849767	1	0.927034	-1.07871	0.839327	1	0.921994	-1.08461
BRAT1	33355	0.307486	1	1.28157	1.28157	0.825752	1	1.05754	1.05754
BRCA1	58916.1	3.95999e-21	7.35358e-19	0.894229	-1.11828	7.71321e-12	7.27178e-10	1.08255	1.08255
BRCA2	34221	0.880343	1	0.930916	-1.07421	0.956109	1	1.02587	1.02587
BRCC3	45099.5	0.481244	1	1.15558	1.15558	0.970992	1	0.992284	-1.00778
BRD1	28492	0.356866	1	0.748019	-1.33686	0.517653	1	0.819801	-1.21981
BRD2	127738	0.445732	1	0.976545	-1.02402	0.294568	1	1.03319	1.03319
BRD3	67839.3	0.272433	1	0.769307	-1.29987	0.719085	1	0.921414	-1.08529
BRD4	70467.7	0.999645	1	0.99988	-1.00012	0.756169	1	1.08526	1.08526
BRD7	50169	0.978134	1	1.00463	1.00463	0.298687	1	0.831744	-1.20229
BRD7P3	227.279	0.101825	0.70508	1.26569	1.26569	0.922285	1	0.993667	-1.00637
BRD8	46326.4	0.664196	1	0.898044	-1.11353	0.705035	1	0.910852	-1.09787
BRD9	23901	0.140814	0.828009	1.03387	1.03387	0.0779187	0.674098	1.04053	1.04053
BRE	12333.5	0.93434	1	1.02715	1.02715	0.801918	1	0.919576	-1.08746
BRE-AS1	120.916	0.326871	1	2.86385	2.86385	0.544285	1	1.92716	1.92716
BREA2	31	0.781731	1	0.854503	-1.17027	0.82938	1	1.16759	1.16759
BRF1	23993.6	0.916882	1	0.961158	-1.04041	0.803677	1	0.908708	-1.10046
BRF2	6246.73	0.679962	1	1.20256	1.20256	0.827774	1	0.900851	-1.11006
BRI3	27226.8	0.795156	1	1.04384	1.04384	0.795805	1	1.0437	1.0437
BRI3BP	11084.9	0.981232	1	1.00551	1.00551	0.809282	1	1.0578	1.0578
BRICD5	1254.87	0.858542	1	1.13347	1.13347	0.77147	1	0.799926	-1.25012
BRINP3	724	0.0157248	0.193368	133.195	133.195	0.18404	1	0.147813	-6.76529
BRIP1	27643	0.0139047	0.176171	0.663228	-1.50778	0.0629397	0.585969	0.739435	-1.35238
BRIX1	39255	0.630814	1	1.07165	1.07165	0.630921	1	0.930847	-1.07429
BRK1	42658	0.613132	1	1.07129	1.07129	0.579098	1	1.07835	1.07835
BRMS1	18281	0.647589	1	1.10649	1.10649	0.570822	1	0.875354	-1.1424
BRMS1L	8371	0.894521	1	0.944867	-1.05835	0.404646	1	0.676279	-1.47868
BROX	21525	0.562118	1	1.00979	1.00979	1.21309e-25	2.75327e-23	0.833034	-1.20043
BRPF1	18391.1	0.719068	1	0.864584	-1.15663	0.62614	1	0.818732	-1.2214
BRPF3	26466	0.996202	1	0.998241	-1.00176	0.446452	1	0.736619	-1.35755
BRS3	14	0.110395	0.734216	0.0044465	-224.896	0.372262	1	0.817899	-1.22264
BRSK1	4077	0.626789	1	1.4781	1.4781	0.327016	1	2.09473	2.09473
BRSK2	23567	0.867039	1	0.938102	-1.06598	0.497672	1	0.760352	-1.31518
BRWD1	55466.2	0.766775	1	0.862561	-1.15934	0.95904	1	1.02479	1.02479
BRWD1-AS1	14	0.837389	1	1.33815	1.33815	0.905361	1	0.58943	-1.69656
BRWD1-IT2	171	0.780998	1	0.585473	-1.70802	0.964541	1	0.928377	-1.07715
BRWD3	74313	0.747254	1	1.11788	1.11788	0.60323	1	1.19366	1.19366
BSCL2	1165.96	0.89912	1	0.872986	-1.14549	0.949892	1	0.935355	-1.06911
BSDC1	30916	0.833361	1	0.933836	-1.07085	0.986798	1	0.994717	-1.00531
BSG	242950	0.000137024	0.00408937	0.733404	-1.3635	0.0212413	0.275972	0.834754	-1.19796
BSN	5767	0.956756	1	1.07455	1.07455	0.98397	1	0.973001	-1.02775
BSN-AS2	217	0.861027	1	1.37224	1.37224	0.681221	1	1.97913	1.97913
BSND	50	0.00165696	0.0327897	15.3874	15.3874	0.769186	1	1.70044	1.70044
BSPRY	111	0.064234	0.528282	0.507852	-1.96908	0.603841	1	1.23825	1.23825
BST1	1358	0.153641	0.861926	0.0707569	-14.1329	0.709209	1	0.76299	-1.31063
BST2	46503	0.477766	1	1.08911	1.08911	0.722319	1	1.04411	1.04411
BTAF1	58046	0.790028	1	1.08033	1.08033	0.563056	1	1.17869	1.17869
BTBD1	111188	0.0277834	0.297449	1.36585	1.36585	0.236579	1	1.18875	1.18875
BTBD10	11741	0.723376	1	1.16352	1.16352	0.432554	1	1.38172	1.38172
BTBD11	1102	0.559521	1	0.255731	-3.91036	0.736541	1	0.551504	-1.81322
BTBD17	12	0.236167	1	0.280563	-3.56426	0.946534	1	1.46575	1.46575
BTBD18	278	0.83451	1	0.795022	-1.25783	0.692851	1	0.593176	-1.68584
BTBD19	17	0.247858	1	2.36642	2.36642	0.419687	1	1.17071	1.17071
BTBD2	73685	0.618292	1	0.926241	-1.07963	0.810194	1	0.964106	-1.03723
BTBD3	26603	0.68227	1	0.862611	-1.15927	0.855576	1	1.06429	1.06429
BTBD6	24963	0.820089	1	1.05217	1.05217	0.564271	1	0.873569	-1.14473
BTBD7	30006.4	0.582349	1	0.783351	-1.27657	0.457147	1	0.712317	-1.40387
BTBD8	334	0.966188	1	1.07401	1.07401	0.985524	1	1.03115	1.03115
BTBD9	7625.02	0.422958	1	1.26314	1.26314	0.625241	1	1.15695	1.15695
BTD	2982.91	0.994586	1	0.999399	-1.0006	0.742889	1	0.983653	-1.01662
BTF3	229383	0.598914	1	0.96893	-1.03207	0.644917	1	0.972751	-1.02801
BTF3L4	43475.5	0.602747	1	0.869748	-1.14976	0.888759	1	0.96415	-1.03718
BTG1	19531	0.777238	1	1.12015	1.12015	0.79866	1	1.10801	1.10801
BTG2	10375	0.0837214	0.627348	0.48248	-2.07263	0.117789	0.847676	0.527318	-1.89639
BTG3	15384.2	0.636293	1	0.883828	-1.13144	0.831061	1	0.946745	-1.05625
BTK	10	0.315425	1	63.7352	63.7352	0.11919	0.851608	86.4397	86.4397
BTLA	63	0.134785	0.810253	0.307612	-3.25085	0.053651	0.530565	3.861	3.861
BTN1A1	37	0.719552	1	0.880376	-1.13588	0.524996	1	1.46595	1.46595
BTN2A1	14165.9	0.786563	1	1.11879	1.11879	0.888431	1	1.06068	1.06068
BTN2A2	8018.51	0.827811	1	1.12609	1.12609	0.937322	1	1.04463	1.04463
BTN2A3P	2244.6	0.74793	1	1.31866	1.31866	0.842709	1	1.1908	1.1908
BTN3A1	7707.98	0.294702	1	2.02368	2.02368	0.26664	1	2.10158	2.10158
BTN3A2	11650.3	0.934061	1	0.959375	-1.04235	0.713732	1	1.1907	1.1907
BTN3A3	3674.79	0.255876	1	1.65294	1.65294	0.337226	1	1.53812	1.53812
BTNL9	6147	0.149072	0.850836	2.46183	2.46183	0.974433	1	1.02401	1.02401
BTRC	21422.9	0.374591	1	1.45339	1.45339	0.8364	1	0.907553	-1.10186
BUB1	80711.2	0.883015	1	1.0259	1.0259	0.795409	1	1.04586	1.04586
BUB1B	93012.7	0.562729	1	0.909397	-1.09963	0.874216	1	0.974807	-1.02584
BUB3	98780.8	0.181928	0.933554	0.833115	-1.20031	0.488834	1	0.911719	-1.09683
BUD13	12261.1	0.576674	1	0.825106	-1.21197	0.683626	1	0.870833	-1.14833
BUD31	26230.9	0.554481	1	1.09985	1.09985	0.990518	1	0.998042	-1.00196
BVES	4096.13	0.183156	0.936359	4.6076	4.6076	0.636	1	1.84287	1.84287
BVES-AS1	62	5.23919e-14	6.25437e-12	20.6102	20.6102	0.0063147	0.110667	9.82519	9.82519
BYSL	28877	0.350355	1	1.21448	1.21448	0.707121	1	0.919761	-1.08724
BZRAP1	11	0.890809	1	1.266	1.266	0.349774	1	0.409653	-2.44109
BZRAP1-AS1	303.19	0.868077	1	1.47787	1.47787	0.904361	1	1.33237	1.33237
BZW1	148144	0.494446	1	0.917755	-1.08962	0.191744	1	0.845707	-1.18244
BZW2	74455.9	0.268022	1	0.870195	-1.14917	0.0697547	0.624328	0.79168	-1.26314
C10orf10	250	0.388604	1	0.219525	-4.55528	0.995516	1	1.03322	1.03322
C10orf105	89.578	0.0966626	0.683092	0.443865	-2.25294	0.0792557	0.679905	0.384364	-2.6017
C10orf107	14	1	1	1	-1	0.00105548	0.0258031	499.532	499.532
C10orf111	378.98	0.646116	1	0.812227	-1.23118	0.719516	1	0.85245	-1.17309
C10orf12	12632	0.722891	1	1.18161	1.18161	0.768261	1	0.860663	-1.1619
C10orf131	66	0.844672	1	1.16338	1.16338	0.636817	1	0.694651	-1.43957
C10orf2	31058.9	0.610971	1	1.14582	1.14582	0.45278	1	0.802495	-1.24611
C10orf25	308.044	0.00778534	0.113143	0.204578	-4.88811	0.0205696	0.269553	0.292814	-3.41514
C10orf32	4934.62	0.823594	1	1.1344	1.1344	0.993679	1	1.00463	1.00463
C10orf32-ASMT	2058.45	0.910147	1	1.1176	1.1176	0.762663	1	1.33112	1.33112
C10orf35	3945	0.692972	1	1.18487	1.18487	0.748892	1	1.14857	1.14857
C10orf54	162	2.66212e-08	1.69768e-06	6.43661	6.43661	1.90255e-09	1.43346e-07	8.32718	8.32718
C10orf55	15.0994	0.00286385	0.0508195	0.0123491	-80.9775	0.168506	1	2.09652	2.09652
C10orf67	12	0.248556	1	0.131926	-7.58002	0.272293	1	0.190745	-5.2426
C10orf71	21	0.757579	1	6.7479	6.7479	0.545097	1	0.0405781	-24.6438
C10orf76	19101	0.837393	1	1.07366	1.07366	0.807768	1	1.08765	1.08765
C10orf82	31	0.230528	1	0.697325	-1.43405	0.069478	0.623065	0.528508	-1.89212
C10orf88	8346	0.464896	1	1.11534	1.11534	0.897191	1	1.01947	1.01947
C10orf95	1878.04	0.924849	1	0.932561	-1.07232	0.8696	1	1.12306	1.12306
C11orf1	2707.12	0.35264	1	0.639234	-1.56437	0.306984	1	0.606657	-1.64838
C11orf16	74	0.000201405	0.00568761	1.94002	1.94002	0.940839	1	0.994759	-1.00527
C11orf24	21861.9	0.616255	1	1.13087	1.13087	0.676109	1	0.89708	-1.11473
C11orf30	23313.9	0.611435	1	0.796818	-1.25499	0.805067	1	0.898702	-1.11272
C11orf31	35397	0.740232	1	1.05193	1.05193	0.617992	1	0.924351	-1.08184
C11orf42	213	0.799978	1	0.72128	-1.38642	0.767565	1	0.681207	-1.46798
C11orf45	2657	0.526267	1	1.37607	1.37607	0.33447	1	1.60208	1.60208
C11orf48	2459.29	0.558177	1	1.43571	1.43571	0.57328	1	1.41742	1.41742
C11orf49	10504.6	0.475103	1	1.33225	1.33225	0.635266	1	1.21459	1.21459
C11orf54	14079.9	0.640437	1	0.851788	-1.174	0.831835	1	1.07128	1.07128
C11orf57	29105.8	0.709999	1	0.900657	-1.1103	0.454322	1	0.804942	-1.24233
C11orf58	88691	0.42188	1	0.873602	-1.14469	0.178787	1	0.792719	-1.26148
C11orf63	2513	0.0783381	0.602833	0.84329	-1.18583	0.0513192	0.515309	0.827461	-1.20852
C11orf65	350	0.786809	1	0.683775	-1.46247	0.881837	1	0.820275	-1.2191
C11orf68	9313.01	0.631474	1	1.17754	1.17754	0.434902	1	1.29739	1.29739
C11orf70	198	0.786941	1	0.452713	-2.20891	0.765238	1	1.88337	1.88337
C11orf71	3962	0.561469	1	1.26423	1.26423	0.730452	1	1.15315	1.15315
C11orf73	13230	0.752784	1	1.08222	1.08222	0.571021	1	0.860139	-1.1626
C11orf74	4533.4	0.724277	1	0.869547	-1.15002	0.320057	1	0.651994	-1.53376
C11orf80	5656.09	0.101398	0.703887	0.73595	-1.35879	0.00426627	0.08136	1.57933	1.57933
C11orf83	14448.7	0.572737	1	0.846853	-1.18084	0.593182	1	0.854649	-1.17007
C11orf84	34580	0.0240168	0.266621	0.643657	-1.55362	0.100929	0.780272	0.734996	-1.36055
C11orf86	15	0.000217415	0.00608366	334.216	334.216	0.000268351	0.00839007	237.228	237.228
C11orf87	32	0.211517	0.998281	3.64167	3.64167	0.078283	0.676295	18.7281	18.7281
C11orf91	26	0.00741664	0.109078	5.92529	5.92529	0.00471187	0.0880316	6.12842	6.12842
C11orf94	42	0.790629	1	1.89145	1.89145	0.93795	1	1.22401	1.22401
C11orf95	29314	0.551711	1	0.820366	-1.21897	0.362917	1	0.731586	-1.36689
C11orf96	2064	0.988979	1	0.987445	-1.01271	0.0711399	0.633028	3.71117	3.71117
C12orf10	16591	0.728944	1	1.07917	1.07917	0.920523	1	1.02248	1.02248
C12orf29	15575.6	0.804844	1	1.08433	1.08433	0.302145	1	0.681799	-1.46671
C12orf4	17245	0.578323	1	1.2317	1.2317	0.98342	1	0.991827	-1.00824
C12orf43	11696.1	0.857769	1	1.07406	1.07406	0.852274	1	0.925844	-1.0801
C12orf45	4071	0.718805	1	1.12278	1.12278	0.726724	1	1.11907	1.11907
C12orf49	20380	0.825922	1	0.93722	-1.06699	0.644083	1	0.870339	-1.14898
C12orf5	14285	0.820331	1	1.15034	1.15034	0.921842	1	1.06358	1.06358
C12orf56	21	0.0506482	0.448731	0.357026	-2.80092	0.789708	1	0.953315	-1.04897
C12orf57	20292	0.0024001	0.0443006	0.680234	-1.47008	7.37441e-06	0.000338928	0.543243	-1.8408
C12orf60	1150	0.605418	1	1.49497	1.49497	0.965178	1	0.963161	-1.03825
C12orf65	16224	0.310765	1	0.747531	-1.33774	0.632782	1	0.876992	-1.14026
C12orf66	6615.99	0.882386	1	1.09538	1.09538	0.93927	1	0.952583	-1.04978
C12orf71	118	0.850355	1	0.618187	-1.61763	0.876597	1	1.37186	1.37186
C12orf73	5563	0.938772	1	1.03259	1.03259	0.820717	1	0.907085	-1.10243
C12orf75	34794	0.892193	1	1.02183	1.02183	0.782927	1	0.956349	-1.04564
C12orf76	2247	0.89019	1	1.11361	1.11361	0.76764	1	1.25124	1.25124
C12orf77	14	0.0141641	0.178596	99.6676	99.6676	0.00981532	0.156772	277.293	277.293
C12orf79	68	0.736926	1	1.07877	1.07877	1.27784e-05	0.000566068	0.220728	-4.53046
C14orf1	18463	0.519925	1	1.17119	1.17119	0.216288	1	1.34257	1.34257
C14orf119	18350.7	0.671826	1	1.1485	1.1485	0.82595	1	1.07572	1.07572
C14orf132	27855.2	0.390622	1	1.51394	1.51394	0.150504	0.962391	1.94144	1.94144
C14orf142	8781	0.602287	1	0.859774	-1.1631	0.374716	1	0.766728	-1.30424
C14orf159	16126	0.53018	1	1.29657	1.29657	0.833675	1	1.09451	1.09451
C14orf166	64928	0.00312878	0.0550425	0.73795	-1.35511	0.0137955	0.201442	0.779301	-1.2832
C14orf169	18630	0.722774	1	1.11022	1.11022	0.970842	1	1.01108	1.01108
C14orf178	55	0.317726	1	1.54365	1.54365	0.797589	1	0.894443	-1.11801
C14orf182	23.428	0.198091	0.970606	2.54063	2.54063	0.518787	1	0.718412	-1.39196
C14orf183	32	0.691377	1	1.32273	1.32273	0.634983	1	0.656707	-1.52275
C14orf2	36051.7	0.497014	1	1.09154	1.09154	0.959083	1	0.993252	-1.00679
C14orf23	34	0.379479	1	1.55399	1.55399	0.0472284	0.487779	2.83427	2.83427
C14orf28	1267	0.756522	1	0.669353	-1.49398	0.996939	1	0.995428	-1.00459
C14orf37	4941	0.552223	1	0.678019	-1.47488	0.703252	1	0.787868	-1.26925
C14orf39	192	0.009597	0.133086	0.270107	-3.70224	0.0994571	0.772136	0.456135	-2.19234
C14orf79	1944	0.798914	1	1.22508	1.22508	0.71877	1	1.32586	1.32586
C14orf80	8675.01	0.765821	1	1.12594	1.12594	0.738858	1	1.14151	1.14151
C14orf93	3513	0.572773	1	0.717147	-1.39441	0.829794	1	0.887481	-1.12678
C15orf26	36	0.326945	1	1.84165	1.84165	0.917294	1	0.701977	-1.42455
C15orf27	3498.9	0.0708323	0.562012	4.04724	4.04724	0.644155	1	1.51076	1.51076
C15orf37	3095.49	0.777539	1	0.830595	-1.20396	0.781946	1	0.833864	-1.19924
C15orf38-AP3S2	119.197	0.647671	1	1.24684	1.24684	0.245704	1	0.613552	-1.62985
C15orf39	57727	0.996889	1	0.999155	-1.00085	0.296002	1	0.785387	-1.27326
C15orf40	11435	0.650488	1	1.19139	1.19139	0.979049	1	1.0106	1.0106
C15orf41	7450	0.621357	1	0.750282	-1.33283	0.76484	1	1.16792	1.16792
C15orf48	255	0.397876	1	3.26246	3.26246	0.487859	1	2.6933	2.6933
C15orf52	726	0.0128992	0.166764	0.420148	-2.38011	0.0282692	0.341909	1.88329	1.88329
C15orf56	13	0.247644	1	0.270275	-3.69993	0.659497	1	1.75918	1.75918
C15orf57	6288.28	0.557225	1	1.37704	1.37704	0.543675	1	1.39118	1.39118
C15orf59	3098	0.0624735	0.519219	2.66591	2.66591	0.647309	1	1.31284	1.31284
C15orf61	11326.3	0.119593	0.763592	1.52659	1.52659	0.893762	1	1.0403	1.0403
C15orf62	1914	0.892405	1	0.977133	-1.0234	0.679385	1	0.92852	-1.07698
C15orf65	134	5.22587e-24	1.1575e-21	3.51265	3.51265	0.00160088	0.0366965	1.48767	1.48767
C16orf13	16719.1	0.380707	1	0.85208	-1.1736	0.457425	1	0.873932	-1.14425
C16orf3	209	0.966645	1	0.932284	-1.07263	0.93544	1	1.12852	1.12852
C16orf45	1111	0.638791	1	0.561001	-1.78253	0.955967	1	1.05885	1.05885
C16orf46	839	0.00193735	0.037139	1.30282	1.30282	0.576472	1	0.950301	-1.0523
C16orf52	8804	0.866774	1	1.05745	1.05745	0.634631	1	0.845616	-1.18257
C16orf58	27790	0.986979	1	1.00417	1.00417	0.962783	1	1.01197	1.01197
C16orf59	12615	0.714641	1	0.903151	-1.10724	0.231213	1	0.698896	-1.43083
C16orf62	25542.1	0.936001	1	0.974863	-1.02578	0.436167	1	1.26105	1.26105
C16orf70	12951	0.920666	1	1.03808	1.03808	0.835542	1	0.922883	-1.08356
C16orf71	304.042	0.476488	1	0.851422	-1.17451	0.752241	1	0.945219	-1.05796
C16orf72	29069	0.43139	1	1.05718	1.05718	0.0348521	0.393806	1.15767	1.15767
C16orf74	2519	0.807737	1	1.10343	1.10343	0.556965	1	0.770855	-1.29726
C16orf86	2209	0.658466	1	1.33666	1.33666	0.506254	1	1.52874	1.52874
C16orf87	9273	0.970787	1	0.988917	-1.01121	0.543561	1	0.823667	-1.21408
C16orf89	50	0.808573	1	1.65359	1.65359	0.900694	1	0.909147	-1.09993
C16orf90	14	0.171791	0.911985	5.80006	5.80006	0.144385	0.942964	7.96901	7.96901
C16orf91	6655	0.492877	1	1.23602	1.23602	0.930284	1	1.02863	1.02863
C16orf93	740.756	0.745155	1	0.707924	-1.41258	0.842698	1	0.816434	-1.22484
C16orf95	1965	0.662822	1	1.28867	1.28867	0.995734	1	1.00315	1.00315
C16orf96	142	0.32654	1	1.15027	1.15027	0.0172977	0.237491	1.44276	1.44276
C17orf100	1120	0.819142	1	0.793114	-1.26085	0.868884	1	1.16394	1.16394
C17orf104	18159	0.488076	1	0.732587	-1.36503	0.598149	1	1.23011	1.23011
C17orf105	14	0.914751	1	1.9942	1.9942	0.198095	1	9.29024	9.29024
C17orf107	449.031	0.165833	0.896404	1.46125	1.46125	0.780353	1	0.930083	-1.07517
C17orf47	11.2103	0.473766	1	1.55869	1.55869	0.146988	0.950659	2.86032	2.86032
C17orf49	11261.4	0.271369	1	1.31632	1.31632	0.030715	0.361875	1.67278	1.67278
C17orf50	43	0.525841	1	2.44824	2.44824	0.684683	1	1.73761	1.73761
C17orf51	24646	0.97013	1	1.01633	1.01633	0.404702	1	0.667295	-1.49859
C17orf53	7495	0.825833	1	0.900043	-1.11106	0.902064	1	1.05827	1.05827
C17orf58	15700	0.302324	1	1.26375	1.26375	0.690431	1	1.09783	1.09783
C17orf59	5585	0.685882	1	1.21121	1.21121	0.60749	1	1.27215	1.27215
C17orf62	26403.8	0.56748	1	0.936495	-1.06781	0.52924	1	1.07236	1.07236
C17orf64	54	0.740061	1	2.7499	2.7499	0.895093	1	1.63075	1.63075
C17orf67	1457	0.886089	1	1.01935	1.01935	0.52489	1	0.910666	-1.0981
C17orf70	22462.1	0.586894	1	1.18502	1.18502	0.955242	1	1.01828	1.01828
C17orf74	48	0.765203	1	0.9544	-1.04778	0.161281	0.995959	0.718925	-1.39097
C17orf75	20790.5	0.941123	1	0.989168	-1.01095	0.429748	1	0.88584	-1.12887
C17orf78	120	0.94574	1	1.08014	1.08014	0.820221	1	0.834497	-1.19833
C17orf80	22718.5	0.834282	1	0.931053	-1.07405	0.742663	1	0.892842	-1.12002
C17orf82	117	0.853753	1	1.09725	1.09725	0.0114237	0.175395	2.31693	2.31693
C17orf85	44205	0.995102	1	1.00212	1.00212	0.824058	1	0.924684	-1.08145
C17orf89	13185	0.387786	1	1.15219	1.15219	0.71316	1	0.938557	-1.06546
C17orf96	30973	0.761485	1	1.07946	1.07946	0.399588	1	0.794732	-1.25829
C17orf97	8306	0.786091	1	1.10781	1.10781	0.903739	1	0.953763	-1.04848
C18orf21	7591.04	0.878108	1	1.04799	1.04799	0.701747	1	0.884964	-1.12999
C18orf25	28662.8	0.806902	1	1.03792	1.03792	0.52666	1	1.10023	1.10023
C18orf32	2541.44	0.964694	1	1.03088	1.03088	0.67111	1	1.31749	1.31749
C18orf54	21071.1	0.580349	1	1.26884	1.26884	0.647354	1	1.21985	1.21985
C18orf61	18.0006	0.543926	1	0.570585	-1.75259	0.179885	1	0.309587	-3.23011
C18orf8	13094.1	0.741589	1	1.11689	1.11689	0.895038	1	1.04596	1.04596
C19orf10	27827	0.0823322	0.621272	1.3128	1.3128	0.770335	1	1.04933	1.04933
C19orf12	16624	0.539965	1	1.32589	1.32589	0.678147	1	1.21498	1.21498
C19orf24	15392	0.0322539	0.330337	1.53689	1.53689	0.232836	1	1.2823	1.2823
C19orf25	17510	0.370154	1	1.29328	1.29328	0.974506	1	0.990284	-1.00981
C19orf26	4714	0.824639	1	1.0517	1.0517	0.953055	1	1.01323	1.01323
C19orf35	56	0.0900312	0.656799	1.5743	1.5743	0.552911	1	1.17004	1.17004
C19orf38	52	0.871708	1	0.628817	-1.59029	0.96866	1	0.884408	-1.1307
C19orf40	4264	0.660319	1	1.24426	1.24426	0.871523	1	1.08652	1.08652
C19orf43	81356	0.50194	1	1.05931	1.05931	0.932631	1	1.00737	1.00737
C19orf44	6231.13	0.860974	1	1.10688	1.10688	0.970753	1	1.02195	1.02195
C19orf45	271	0.966925	1	0.919126	-1.08799	0.893244	1	1.29343	1.29343
C19orf47	9739.82	0.88113	1	1.05872	1.05872	0.778495	1	0.894011	-1.11855
C19orf48	65645.7	0.456615	1	1.11305	1.11305	0.149682	0.96014	0.797864	-1.25335
C19orf52	8480	0.921089	1	1.03166	1.03166	0.819096	1	0.928708	-1.07677
C19orf53	25201	0.265074	1	1.18772	1.18772	0.67355	1	1.06894	1.06894
C19orf54	22664	0.826538	1	1.06025	1.06025	0.254966	1	0.713293	-1.40195
C19orf57	1131	9.89606e-31	3.24873e-28	0.489478	-2.04299	7.38452e-35	2.95124e-32	0.46351	-2.15745
C19orf60	7182.98	0.625811	1	1.09991	1.09991	0.317189	1	1.21084	1.21084
C19orf66	5477.28	0.520654	1	1.43995	1.43995	0.218107	1	1.93728	1.93728
C19orf67	21	0.741449	1	0.773371	-1.29304	0.84982	1	1.32007	1.32007
C19orf68	6084	0.807774	1	0.857881	-1.16566	0.958389	1	0.968638	-1.03238
C19orf70	7268.11	0.797527	1	1.07692	1.07692	0.679361	1	1.12542	1.12542
C19orf71	940	0.960667	1	0.967761	-1.03331	0.967682	1	0.97351	-1.02721
C19orf73	623	0.859688	1	1.19121	1.19121	0.506299	1	1.82814	1.82814
C19orf80	45	0.897042	1	0.580532	-1.72256	0.810713	1	2.09488	2.09488
C19orf81	117	0.831283	1	1.56625	1.56625	0.806017	1	1.66661	1.66661
C19orf83	416.901	0.78544	1	1.44449	1.44449	0.598133	1	1.95948	1.95948
C19orf84	25	0.909029	1	0.985502	-1.01471	0.769108	1	1.26922	1.26922
C1D	6843.95	0.886168	1	1.04794	1.04794	0.803683	1	0.919409	-1.08766
C1GALT1	13407	0.615666	1	1.32421	1.32421	0.60573	1	1.33405	1.33405
C1GALT1C1	17180	0.489353	1	1.20622	1.20622	0.746824	1	1.0937	1.0937
C1QB	34	0.677779	1	31.4594	31.4594	0.587356	1	0.02049	-48.8043
C1QBP	169254	0.000677258	0.0156613	1.25062	1.25062	0.403163	1	0.942836	-1.06063
C1QL1	6303	0.719496	1	1.15645	1.15645	0.626895	1	1.21473	1.21473
C1QL3	1018	0.825582	1	0.770301	-1.29819	0.938097	1	1.08891	1.08891
C1QL4	12356	0.87485	1	1.06014	1.06014	0.097724	0.765796	1.73824	1.73824
C1QTNF1	781	0.627503	1	0.402164	-2.48655	0.733788	1	0.565282	-1.76903
C1QTNF2	34	0.511655	1	0.788575	-1.26811	0.272317	1	0.695476	-1.43786
C1QTNF3	801.281	0.880168	1	0.834265	-1.19866	0.935337	1	1.10008	1.10008
C1QTNF3-AMACR	528.939	0.794924	1	0.569695	-1.75533	0.839733	1	0.657782	-1.52026
C1QTNF4	16	0.00939811	0.131252	345.446	345.446	0.010591	0.165284	172.855	172.855
C1QTNF5	10.7346	0.288647	1	3.44242	3.44242	0.67684	1	0.675089	-1.48129
C1QTNF6	1412	0.0207017	0.238908	1.91866	1.91866	0.790403	1	1.08571	1.08571
C1QTNF7	26	0.152444	0.857832	1.8125	1.8125	0.63525	1	0.864377	-1.1569
C1QTNF9	53.7432	8.20732e-06	0.000350892	6.95215	6.95215	0.725465	1	0.764204	-1.30855
C1QTNF9B	1367.82	0.0739017	0.578132	34.0119	34.0119	0.872905	1	1.49539	1.49539
C1QTNF9B-AS1	1779.44	0.00796053	0.115233	7.20302	7.20302	0.960381	1	0.951607	-1.05085
C1R	9074.31	0.00174323	0.0342024	0.215774	-4.63447	0.0572664	0.554787	0.507739	-1.96951
C1RL	9268.57	0.86113	1	0.907959	-1.10137	0.604819	1	1.29966	1.29966
C1RL-AS1	2758.11	0.568633	1	0.475645	-2.10241	0.949963	1	1.06682	1.06682
C1S	472	0.203096	0.981051	1.77544	1.77544	0.883036	1	0.921719	-1.08493
C1orf101	67	0.0171741	0.207716	0.537941	-1.85894	0.000923053	0.023214	0.32508	-3.07616
C1orf109	17610	0.66908	1	1.13141	1.13141	0.668645	1	0.876512	-1.14089
C1orf111	37	0.894059	1	1.0252	1.0252	0.562952	1	1.3334	1.3334
C1orf112	15383	0.547313	1	0.804956	-1.2423	0.395516	1	0.729809	-1.37022
C1orf115	14861	0.452972	1	1.32121	1.32121	0.536603	1	1.26075	1.26075
C1orf122	14487.5	0.50204	1	1.175	1.175	0.840239	1	0.950285	-1.05232
C1orf123	8228.11	0.697274	1	1.12081	1.12081	0.970727	1	1.01109	1.01109
C1orf127	24	0.895519	1	1.89569	1.89569	0.1814	1	16.8111	16.8111
C1orf131	11417.1	0.683192	1	1.1214	1.1214	0.677053	1	0.88326	-1.13217
C1orf145	186.839	0.939399	1	0.889709	-1.12396	0.636639	1	2.04169	2.04169
C1orf146	13	0.672823	1	0.594213	-1.6829	0.482308	1	1.61276	1.61276
C1orf159	8909	0.543933	1	1.26585	1.26585	0.954976	1	1.02331	1.02331
C1orf162	296	0.956387	1	1.08346	1.08346	0.880503	1	1.24057	1.24057
C1orf167	53.4263	0.623606	1	2.00649	2.00649	0.134793	0.909324	3.37771	3.37771
C1orf168	43	0.424175	1	3.20793	3.20793	0.165507	1	0.161819	-6.17974
C1orf174	14190	0.740005	1	1.09381	1.09381	0.625817	1	0.869685	-1.14984
C1orf186	31	0.0610752	0.509903	793.06	793.06	0.323145	1	89.7163	89.7163
C1orf189	32	0.846041	1	1.17923	1.17923	0.511518	1	1.64949	1.64949
C1orf192	1525	0.929363	1	0.950918	-1.05162	0.747175	1	0.82703	-1.20915
C1orf194	14	0.201602	0.978947	1.79798	1.79798	0.640109	1	0.636247	-1.57172
C1orf198	30501.5	0.688056	1	1.05968	1.05968	0.987886	1	1.00232	1.00232
C1orf204	30.09	0.252912	1	0.291512	-3.43039	0.609118	1	1.31237	1.31237
C1orf21	17913	0.302941	1	0.521179	-1.91873	0.516892	1	0.686393	-1.45689
C1orf213	4115.77	0.930683	1	0.938078	-1.06601	0.58407	1	1.43955	1.43955
C1orf216	18894	0.746	1	1.10977	1.10977	0.867296	1	1.05588	1.05588
C1orf220	2179	0.953365	1	0.9497	-1.05296	0.99343	1	0.99281	-1.00724
C1orf226	3057	0.67459	1	0.648056	-1.54308	0.963149	1	1.04284	1.04284
C1orf228	100	0.599195	1	1.48629	1.48629	0.378826	1	1.92295	1.92295
C1orf229	49	0.533951	1	0.800194	-1.2497	0.92874	1	0.965699	-1.03552
C1orf233	1806	0.941116	1	0.928519	-1.07698	0.49959	1	1.79867	1.79867
C1orf234	16	0.547236	1	0.639679	-1.56328	0.599696	1	1.49652	1.49652
C1orf27	12850	0.700528	1	1.18198	1.18198	0.90883	1	0.948849	-1.05391
C1orf35	12757	0.973268	1	0.991525	-1.00855	0.695599	1	0.903246	-1.10712
C1orf43	98833.4	0.920441	1	0.986533	-1.01365	0.864011	1	0.976963	-1.02358
C1orf50	4152.01	0.963256	1	1.01915	1.01915	0.689596	1	1.17234	1.17234
C1orf52	15345	0.969153	1	1.01499	1.01499	0.901929	1	1.04817	1.04817
C1orf53	1091	0.455238	1	1.57769	1.57769	0.722375	1	0.773379	-1.29303
C1orf54	20	0.793387	1	2.78766	2.78766	0.747809	1	3.5415	3.5415
C1orf56	3278.13	0.877129	1	1.08978	1.08978	0.668545	1	1.25867	1.25867
C1orf61	593	0.291785	1	2.79244	2.79244	0.777125	1	0.690649	-1.44791
C1orf74	2004	0.778492	1	1.21264	1.21264	0.88025	1	0.894633	-1.11778
C1orf85	216	0.913575	1	1.33081	1.33081	0.819964	1	1.766	1.766
C1orf86	21579.5	0.937502	1	1.01913	1.01913	0.905674	1	0.971806	-1.02901
C1orf95	1135	0.8695	1	0.694535	-1.43981	0.99598	1	0.990678	-1.00941
C2	233.706	0.0251476	0.276337	2.02325	2.02325	0.0164948	0.230251	2.26965	2.26965
C20orf144	62	0.710127	1	1.85246	1.85246	0.946652	1	1.12943	1.12943
C20orf166-AS1	93	2.67312e-07	1.47576e-05	8.47643	8.47643	0.282682	1	0.636284	-1.57162
C20orf173	14	0.588263	1	1.86738	1.86738	0.802448	1	1.80937	1.80937
C20orf194	8789	0.988748	1	0.988997	-1.01113	0.563272	1	1.51088	1.51088
C20orf195	150	0.880226	1	0.745552	-1.34129	0.494393	1	2.85866	2.85866
C20orf196	808	0.833851	1	0.814774	-1.22733	0.947806	1	0.940243	-1.06355
C20orf202	17	0.11956	0.763592	2.19619	2.19619	0.0672861	0.610255	2.60036	2.60036
C20orf203	10	0.907769	1	0.623819	-1.60303	0.315668	1	3.47456	3.47456
C20orf24	36163.5	0.247831	1	1.18427	1.18427	0.395906	1	0.874645	-1.14332
C20orf26	32	0.152234	0.857787	1.80796	1.80796	0.243636	1	1.60228	1.60228
C20orf27	37819.4	0.157585	0.871294	1.2997	1.2997	0.453919	1	0.857533	-1.16614
C20orf96	4670.99	0.758469	1	1.16826	1.16826	0.466238	1	1.42324	1.42324
C21orf119	1774	0.997066	1	1.00206	1.00206	0.83439	1	1.12052	1.12052
C21orf140	246	0.938168	1	0.885895	-1.1288	0.907568	1	0.832004	-1.20192
C21orf15	747.776	0.146914	0.844985	13.8971	13.8971	0.655726	1	2.51915	2.51915
C21orf2	4432	0.843721	1	1.12669	1.12669	0.600833	1	0.698105	-1.43245
C21orf33	55094.1	0.0391603	0.377879	1.33191	1.33191	0.966681	1	0.993806	-1.00623
C21orf49	115	0.000249513	0.00684634	0.71831	-1.39216	0.153307	0.971863	0.881889	-1.13393
C21orf58	26750.9	0.33344	1	0.740201	-1.35098	0.642514	1	0.871096	-1.14798
C21orf59	27237.4	0.882852	1	1.02877	1.02877	0.367764	1	1.18259	1.18259
C21orf62	52.0012	0.932734	1	1.2385	1.2385	0.686908	1	1.23757	1.23757
C21orf67	1032	0.862469	1	0.86268	-1.15918	0.737368	1	0.743952	-1.34417
C21orf90	37	0.384297	1	0.572296	-1.74735	0.206571	1	0.407717	-2.45268
C21orf91	17604	0.316963	1	0.643889	-1.55306	0.326419	1	0.650236	-1.5379
C22orf15	79	0.11419	0.74601	0.713329	-1.40188	0.152502	0.969766	0.73277	-1.36468
C22orf23	2364	0.712578	1	1.16228	1.16228	0.743034	1	1.14484	1.14484
C22orf24	100	5.91499e-05	0.00199867	0.388407	-2.57462	0.0976078	0.765796	0.68639	-1.4569
C22orf29	18966.8	0.776765	1	0.874804	-1.14311	0.674146	1	0.817069	-1.22389
C22orf31	12	0.833458	1	0.244751	-4.08578	0.435632	1	1.26811	1.26811
C22orf34	6964.98	0.374313	1	1.73433	1.73433	0.638493	1	1.35742	1.35742
C22orf39	17519	0.84743	1	0.939158	-1.06478	0.987412	1	0.99494	-1.00509
C22orf46	17316	0.783163	1	0.889084	-1.12475	0.829385	1	0.912604	-1.09577
C2CD2	21831.8	0.399235	1	0.735863	-1.35895	0.488977	1	0.780677	-1.28094
C2CD2L	8579.98	0.902296	1	1.0537	1.0537	0.751369	1	1.14156	1.14156
C2CD3	22730.2	0.960992	1	1.0225	1.0225	0.949591	1	0.971406	-1.02944
C2CD4A	1247.42	0.451599	1	4.27369	4.27369	0.437182	1	4.45246	4.45246
C2CD4B	18.5785	0.363468	1	2.9429	2.9429	0.985981	1	0.89599	-1.11608
C2CD4C	7314	0.422888	1	0.629105	-1.58956	0.854746	1	1.09527	1.09527
C2CD5	33585	0.76316	1	0.908032	-1.10128	0.74596	1	1.10385	1.10385
C2orf15	509	0.727895	1	0.609124	-1.6417	0.934528	1	1.10494	1.10494
C2orf16	827	0.317512	1	1.30003	1.30003	0.115483	0.84081	1.51338	1.51338
C2orf27A	404.589	0.0442881	0.410379	1.46989	1.46989	0.600977	1	0.898906	-1.11246
C2orf42	3803	0.927267	1	0.942465	-1.06105	0.903074	1	0.923586	-1.08274
C2orf43	17903	0.951104	1	0.977068	-1.02347	0.799656	1	0.906749	-1.10284
C2orf44	24852	0.687395	1	1.13436	1.13436	0.815567	1	0.926048	-1.07986
C2orf47	10393.6	0.501696	1	1.22997	1.22997	0.885688	1	1.04707	1.04707
C2orf48	655	0.422634	1	0.49649	-2.01414	0.497012	1	0.56658	-1.76498
C2orf49	17614.9	0.873333	1	0.940991	-1.06271	0.876038	1	0.942311	-1.06122
C2orf50	71	0.879884	1	0.750063	-1.33322	0.880458	1	1.24433	1.24433
C2orf61	39	0.608981	1	0.7184	-1.39198	0.319965	1	1.71297	1.71297
C2orf66	55	0.437096	1	3.63346	3.63346	0.61354	1	1.99518	1.99518
C2orf68	21242	0.805855	1	0.915024	-1.09287	0.812502	1	0.917918	-1.08942
C2orf69	15983	0.863177	1	0.933799	-1.07089	0.891177	1	1.05414	1.05414
C2orf70	36	0.999736	1	1.02539	1.02539	0.83785	1	2.09167	2.09167
C2orf72	2077	0.616322	1	0.564604	-1.77115	0.926233	1	0.912236	-1.09621
C2orf74	61	6.29401e-05	0.00209998	4.00365	4.00365	0.0577956	0.55863	1.92792	1.92792
C2orf76	1180	0.85602	1	1.13995	1.13995	0.986619	1	1.01254	1.01254
C2orf81	993.587	0.623472	1	2.03232	2.03232	0.447084	1	2.8422	2.8422
C2orf82	577	0.564655	1	1.51529	1.51529	0.920498	1	1.08064	1.08064
C2orf88	6751.98	0.338417	1	1.98795	1.98795	0.453788	1	1.73439	1.73439
C3	3555	0.732351	1	3.35041	3.35041	0.214396	1	48.9013	48.9013
C3AR1	33	0.320779	1	1.59228	1.59228	0.688624	1	1.17634	1.17634
C3orf14	29	0.940334	1	0.751466	-1.33073	0.439679	1	1.684	1.684
C3orf17	35906.9	5.46461e-13	6.01565e-11	0.743851	-1.34435	2.81175e-06	0.000138212	0.828483	-1.20703
C3orf18	231.402	0.120732	0.76827	0.815627	-1.22605	0.264872	1	1.16751	1.16751
C3orf20	47	0.00301499	0.0531424	3.92336	3.92336	0.0827296	0.696702	1.84807	1.84807
C3orf22	23	0.296071	1	0.368833	-2.71126	0.50665	1	6.51423	6.51423
C3orf33	3202.03	0.62306	1	1.35504	1.35504	0.657911	1	1.31721	1.31721
C3orf35	305	0.0259029	0.282108	1.75548	1.75548	0.711755	1	1.09328	1.09328
C3orf38	10980.5	0.87567	1	1.06211	1.06211	0.708006	1	0.858738	-1.1645
C3orf43	17	0.253025	1	2.20204	2.20204	0.485944	1	0.901869	-1.10881
C3orf49	126	0.900302	1	1.31812	1.31812	0.887739	1	0.703357	-1.42175
C3orf52	3911.01	0.390277	1	1.77246	1.77246	0.487818	1	1.60163	1.60163
C3orf58	18826.1	0.00451467	0.0738595	0.272732	-3.66661	0.0179668	0.243779	0.387289	-2.58205
C3orf62	3833	0.907662	1	1.09226	1.09226	0.867654	1	0.874528	-1.14347
C3orf65	203	0.932456	1	1.22923	1.22923	0.907001	1	1.3268	1.3268
C3orf67	1732	0.875102	1	1.16677	1.16677	0.951041	1	1.06353	1.06353
C3orf70	1258	0.581298	1	0.355074	-2.81631	0.644877	1	0.450789	-2.21833
C3orf80	546	0.986835	1	0.975881	-1.02471	0.564101	1	0.260839	-3.83378
C4A	583.227	0.178072	0.928656	1.29804	1.29804	0.820064	1	0.945194	-1.05798
C4B	469.886	0.00381562	0.064651	1.50669	1.50669	0.0526259	0.523525	1.16922	1.16922
C4B_2	469.886	0.00381562	0.064651	1.50669	1.50669	0.0526259	0.523525	1.16922	1.16922
C4orf19	126.113	0.363843	1	0.691276	-1.4466	0.764591	1	0.850494	-1.17579
C4orf26	27	0.664019	1	0.906311	-1.10337	0.0670495	0.609641	0.593351	-1.68534
C4orf27	16720	0.690962	1	1.08868	1.08868	0.626902	1	0.896658	-1.11525
C4orf29	4730	0.9457	1	1.03809	1.03809	0.978916	1	1.01468	1.01468
C4orf3	29305.3	0.782883	1	1.07875	1.07875	0.254241	1	1.34745	1.34745
C4orf32	8718	0.11203	0.73846	2.09958	2.09958	0.697625	1	1.2229	1.2229
C4orf33	6856.99	0.838938	1	0.912958	-1.09534	0.746272	1	1.14684	1.14684
C4orf36	254.01	0.0476701	0.430873	2.66429	2.66429	0.195728	1	1.95279	1.95279
C4orf45	17	0.0474852	0.430045	2.22757	2.22757	0.0180416	0.2446	2.44986	2.44986
C4orf46	23192.3	0.49576	1	1.24189	1.24189	0.824548	1	0.927139	-1.07859
C4orf47	316	0.460105	1	4.56431	4.56431	0.336117	1	6.80059	6.80059
C4orf48	6218	0.714563	1	1.09103	1.09103	0.893079	1	1.03297	1.03297
C5	634	0.0930874	0.669006	0.560165	-1.78519	0.820408	1	1.09124	1.09124
C5AR1	213	0.873648	1	1.59806	1.59806	0.790172	1	2.1166	2.1166
C5orf15	35037	0.677992	1	1.07577	1.07577	0.74875	1	1.05818	1.05818
C5orf22	22242	0.90539	1	0.962474	-1.03899	0.828767	1	0.932232	-1.07269
C5orf24	44515.4	0.821188	1	0.940187	-1.06362	0.665825	1	0.887225	-1.12711
C5orf27	18	0.272854	1	2.10283	2.10283	0.48542	1	0.813737	-1.2289
C5orf28	4538	0.613599	1	1.32169	1.32169	0.474343	1	1.47139	1.47139
C5orf30	13155	0.700777	1	1.15576	1.15576	0.729248	1	0.869362	-1.15027
C5orf34	9780	0.802237	1	1.11074	1.11074	0.730042	1	1.15421	1.15421
C5orf38	4925.98	0.013856	0.17587	0.00595299	-167.983	7.22495e-05	0.00261979	0.229414	-4.35893
C5orf42	12521	0.999243	1	1.00078	1.00078	0.839652	1	1.16704	1.16704
C5orf45	3462.95	0.997786	1	1.00139	1.00139	0.535006	1	1.34165	1.34165
C5orf49	90	0.238127	1	0.791341	-1.26368	0.949736	1	1.00893	1.00893
C5orf51	38924	0.737411	1	1.09826	1.09826	0.957703	1	0.984884	-1.01535
C5orf55	2558	0.903278	1	1.07824	1.07824	0.85165	1	0.885441	-1.12938
C5orf56	249	0.849675	1	1.34641	1.34641	0.741028	1	1.64629	1.64629
C5orf60	15	0.195159	0.963437	4.63479	4.63479	0.135144	0.909324	10.3953	10.3953
C5orf63	424	0.176697	0.925207	1.50857	1.50857	0.0844754	0.703799	1.70589	1.70589
C5orf66	5827.56	0.734254	1	0.839955	-1.19054	0.582061	1	0.746609	-1.33939
C5orf66-AS1	13	0.127347	0.786996	1.47887	1.47887	0.0345212	0.391027	1.8987	1.8987
C6orf1	3601	0.975095	1	0.984693	-1.01555	0.494034	1	1.36784	1.36784
C6orf10	13	0.943645	1	0.962957	-1.03847	0.00182693	0.0410088	0.0465732	-21.4716
C6orf100	183	0.115226	0.749314	1.8502	1.8502	0.137642	0.915974	1.8291	1.8291
C6orf106	86099.2	0.00606371	0.0928187	1.67289	1.67289	0.292619	1	1.23374	1.23374
C6orf118	11	0.0428081	0.403582	0.0040737	-245.477	0.118886	0.850098	0.109615	-9.12281
C6orf120	25686.4	0.807067	1	1.07529	1.07529	0.850848	1	0.943968	-1.05936
C6orf132	141	0.447391	1	1.1756	1.1756	0.00201529	0.0442641	2.57154	2.57154
C6orf136	7647.75	0.000173987	0.00502131	1.20793	1.20793	0.000741496	0.0196198	1.12574	1.12574
C6orf141	1198	0.625354	1	0.646419	-1.54698	0.369125	1	0.385562	-2.59362
C6orf147	3155.77	0.393172	1	1.65799	1.65799	0.331897	1	1.76466	1.76466
C6orf15	175	3.06851e-05	0.00112373	1257	1257	0.00063004	0.0170333	13.408	13.408
C6orf163	456	0.871266	1	1.19995	1.19995	0.997484	1	1.00334	1.00334
C6orf164	390	0.766747	1	1.51941	1.51941	0.838815	1	1.34113	1.34113
C6orf165	94	0.0638942	0.526741	3.84039	3.84039	0.123384	0.869462	3.14224	3.14224
C6orf195	56	0.69339	1	3.78669	3.78669	0.593139	1	7.06991	7.06991
C6orf201	1904.44	0.906992	1	1.10124	1.10124	0.864949	1	1.1499	1.1499
C6orf203	6824.01	0.546161	1	1.28064	1.28064	0.992227	1	1.00424	1.00424
C6orf211	59572.2	0.0100763	0.138344	1.48283	1.48283	0.000777143	0.0203809	0.502885	-1.98853
C6orf226	1269	0.731485	1	0.83518	-1.19735	0.709716	1	0.82182	-1.21681
C6orf229	16	0.879926	1	0.537438	-1.86068	0.710711	1	0.941177	-1.0625
C6orf25	43	0.334503	1	0.717624	-1.39349	0.183856	1	0.636041	-1.57223
C6orf47	10984	0.829953	1	1.13718	1.13718	0.912166	1	1.06988	1.06988
C6orf48	26266	0.970228	1	1.01213	1.01213	0.831927	1	0.932383	-1.07252
C6orf52	367	0.748447	1	0.667082	-1.49907	0.839543	1	0.783634	-1.27611
C6orf57	2490	0.9328	1	1.0334	1.0334	0.516218	1	1.27254	1.27254
C6orf62	47917.3	0.328056	1	0.837034	-1.19469	0.278235	1	0.820108	-1.21935
C6orf89	48498.6	0.429839	1	1.272	1.272	0.68725	1	1.13417	1.13417
C6orf99	183	0.708663	1	0.506519	-1.97426	0.796874	1	1.42591	1.42591
C7orf13	14	0.617068	1	0.90806	-1.10125	0.265055	1	0.446907	-2.2376
C7orf25	5968	0.429292	1	1.4247	1.4247	0.526211	1	1.3335	1.3335
C7orf26	12192	0.688415	1	1.13344	1.13344	0.683481	1	0.872866	-1.14565
C7orf31	5545	0.788716	1	0.893967	-1.11861	0.659649	1	0.829126	-1.20609
C7orf43	6987	0.868691	1	1.08134	1.08134	0.75067	1	0.852391	-1.17317
C7orf49	17413.8	0.80446	1	0.933982	-1.07068	0.559262	1	0.847662	-1.17972
C7orf50	41798.1	0.309743	1	1.1573	1.1573	0.551827	1	1.09066	1.09066
C7orf55	5410.49	0.90056	1	0.949056	-1.05368	0.798194	1	0.897117	-1.11468
C7orf55-LUC7L2	32410.7	0.92405	1	1.02259	1.02259	0.850107	1	0.955952	-1.04608
C7orf57	51	0.0187079	0.221745	0.497939	-2.00828	0.929332	1	1.02263	1.02263
C7orf60	5453	0.631458	1	0.734288	-1.36186	0.768542	1	0.832681	-1.20094
C7orf61	197	0.817738	1	0.651831	-1.53414	0.939222	1	0.878046	-1.13889
C7orf63	1380	0.948594	1	0.922906	-1.08353	0.877941	1	0.821415	-1.21741
C7orf73	32604	0.0819784	0.619438	0.922734	-1.08374	3.41743e-06	0.000164466	0.801411	-1.2478
C8G	75	0.660311	1	1.27445	1.27445	0.320043	1	1.69218	1.69218
C8orf12	10	0.195161	0.963437	1.74373	1.74373	0.374045	1	0.601236	-1.66324
C8orf31	53	0.00268112	0.0483708	0.00188892	-529.402	0.866509	1	1.19835	1.19835
C8orf33	42671	0.909284	1	1.02252	1.02252	0.407125	1	0.843421	-1.18565
C8orf34	224	0.0176738	0.212086	24.4564	24.4564	0.0107568	0.167445	43.4351	43.4351
C8orf37	3296	0.743512	1	1.15257	1.15257	0.181853	1	1.70641	1.70641
C8orf4	69	0.0326909	0.334069	1811.92	1811.92	0.31923	1	52.7598	52.7598
C8orf44	2639.76	0.973262	1	0.976254	-1.02432	0.741944	1	1.24954	1.24954
C8orf44-SGK3	1249.23	0.918305	1	1.19091	1.19091	0.736373	1	1.70069	1.70069
C8orf46	165	0.000541256	0.0131794	2.74921	2.74921	3.83708e-15	4.7987e-13	14.7987	14.7987
[truncated: 16,385 more rows]

## Sheet: TOP25 up and down SMARCB1
Gene symbol	Total reads	P-value (SMARCB1_Null vs. Wildtype)	FDR step up (SMARCB1_Null vs. Wildtype)	Ratio (SMARCB1_Null vs. Wildtype)	Fold change (SMARCB1_Null vs. Wildtype)	P-value (SMARCA4_Null vs. Wildtype)	FDR step up (SMARCA4_Null vs. Wildtype)	Ratio (SMARCA4_Null vs. Wildtype)	Fold change (SMARCA4_Null vs. Wildtype)
TNFAIP6	3571	1.26902e-15	1.69056e-13	512.4	512.4	0.005573	0.10015	0.00415215	-240.839
CALCRL	4119.97	6.78876e-06	0.000295046	371.152	371.152	0.0752003	0.658233	0.0982977	-10.1732
IGF2	65689.5	2.1327e-05	0.000813435	234.449	234.449	0.781413	1	0.547445	-1.82667
GPR158	2761.44	2.31235e-05	0.000872901	176.149	176.149	0.132265	0.901579	6.7995	6.7995
PTPRZ1	1013	7.56466e-09	5.20856e-07	108.836	108.836	0.142973	0.938382	0.306666	-3.26088
ERBB4	4519.99	2.85648e-78	3.75096e-75	54.981	54.981	1.08707e-45	6.44666e-43	19.9579	19.9579
CRB1	1764	4.32525e-17	6.30142e-15	49.8826	49.8826	0.0623558	0.583736	0.333423	-2.9992
SLC7A3	88372.4	3.16048e-28	8.67199e-26	30.3417	30.3417	0.000228647	0.00722242	3.56301	3.56301
ACTA2	8690.39	1.1538e-05	0.000470321	14.044	14.044	0.550762	1	0.560298	-1.78477
H2AFY2	16595	9.76283e-11	8.38691e-09	9.46086	9.46086	3.17113e-07	1.8105e-05	6.16742	6.16742
VDR	2573	8.79026e-115	4.04e-111	7.0739	7.0739	1.68939e-43	9.13465e-41	3.16059	3.16059
ABCB1	39890.6	6.9915e-08	4.13285e-06	5.85794	5.85794	0.269483	1	0.575051	-1.73898
KCNC3	1498.11	7.32313e-13	8.01359e-11	5.59838	5.59838	6.84438e-10	5.42358e-08	4.49509	4.49509
SH3GL3	33955	1.86013e-10	1.54736e-08	5.21771	5.21771	0.94026	1	1.02533	1.02533
NELL2	38051.4	2.76886e-08	1.75526e-06	5.08605	5.08605	0.0105593	0.16507	0.152087	-6.57518
CDH10	13890	7.32339e-06	0.00031604	4.64961	4.64961	0.474903	1	0.710709	-1.40705
C8orf82	15012.7	5.75709e-06	0.000254419	4.59186	4.59186	0.613635	1	1.23005	1.23005
FMNL1	1251	1.23269e-18	2.00547e-16	4.50837	4.50837	1.24487e-26	2.89693e-24	6.08886	6.08886
MEGF9	46387	8.53173e-06	0.000363073	4.40965	4.40965	0.932375	1	0.964209	-1.03712
SLC12A2	71441.5	1.03972e-07	5.97319e-06	4.37756	4.37756	0.526187	1	0.787277	-1.2702
PGM2	88031	4.06957e-15	5.34392e-13	4.32736	4.32736	0.00476987	0.0887544	1.80644	1.80644
PAPSS2	54100.4	1.05224e-07	6.02631e-06	4.31407	4.31407	0.000415962	0.0120806	2.77265	2.77265
RNF157	75731.6	1.00023e-09	7.6618e-08	4.19886	4.19886	0.385918	1	1.27679	1.27679
MMP17	27187	8.20531e-07	4.20185e-05	3.76954	3.76954	0.447613	1	1.27469	1.27469
PTPN21	6380	5.88741e-61	5.15401e-58	3.50815	3.50815	1.73959e-93	3.5534e-90	4.74459	4.74459
FZD8	1390.03	3.71828e-06	0.00017132	0.209244	-4.77911	2.2712e-05	0.000944656	0.262399	-3.81098
MMD	19206	1.5018e-05	0.000593746	0.197799	-5.05564	7.19229e-05	0.0026131	0.26969	-3.70796
FA2H	5907	8.74085e-110	2.6782e-106	0.192382	-5.19798	3.05326e-28	8.01873e-26	1.73779	1.73779
GLIS3	1312.39	1.23042e-11	1.17813e-09	0.192275	-5.20088	7.48997e-22	1.36332e-19	16.6159	16.6159
SKIDA1	2642	5.7573e-105	1.17602e-101	0.164363	-6.08408	2.02246e-06	0.000102427	0.778156	-1.28509
RYR2	1211	4.3873e-10	3.47656e-08	0.156177	-6.40299	1.34961e-25	3.02576e-23	0.0332089	-30.1124
TMSB4X	43772	4.301e-13	4.82132e-11	0.152151	-6.57241	9.9077e-42	4.92279e-39	4.15404	4.15404
SLIT2	14033	1.02877e-61	9.45643e-59	0.114267	-8.75142	4.6725e-19	7.6017e-17	1.90002	1.90002
ST6GAL1	50219.5	1.13377e-07	6.45303e-06	0.113257	-8.82947	0.00254857	0.053061	0.50557	-1.97796
SMARCB1	33262.5	2.94906e-10	2.38835e-08	0.108348	-9.2295	0.844326	1	0.969604	-1.03135
OTX2	61469.5	4.54915e-18	7.148e-16	0.0905108	-11.0484	9.44141e-12	8.72215e-10	0.338981	-2.95001
ITM2A	103797	4.10865e-43	2.22157e-40	0.0903594	-11.0669	7.33409e-39	3.37075e-36	0.202591	-4.93605
CDH6	49973	1.99181e-05	0.000764457	0.0694358	-14.4018	0.0001233	0.00421327	0.260172	-3.84361
STARD13	1157	5.56012e-30	1.70362e-27	0.0608713	-16.4281	1.03713e-28	2.8039e-26	0.0674885	-14.8173
PDE11A	1882	1.87624e-12	1.94875e-10	0.059129	-16.9122	3.3266e-10	2.73019e-08	0.110461	-9.05296
ARHGAP6	1025	4.09763e-16	5.53904e-14	0.0532721	-18.7715	0.000513375	0.0142897	0.00502609	-198.962
LBH	35607	6.4668e-06	0.000283061	0.0385244	-25.9576	0.887449	1	1.02803	1.02803
BASP1	31575.7	1.94229e-09	1.45743e-07	0.0353107	-28.3201	4.31879e-05	0.00167497	0.477017	-2.09636
CD24	48518.6	4.24212e-06	0.000192138	0.0105163	-95.0908	0.0212148	0.275972	0.695178	-1.43848
ST8SIA4	1296	5.74444e-11	5.22801e-09	0.00889265	-112.452	2.59146e-09	1.92103e-07	0.0139715	-71.5742
RIMS2	2656.98	1.52871e-05	0.000601794	0.00808907	-123.624	2.44768e-06	0.000121946	0.07174	-13.9392
HPGD	8604.02	3.32658e-13	3.7985e-11	0.00139389	-717.416	0.000338141	0.0102243	0.000346849	-2883.1
MGAT4C	1099	2.3308e-06	0.000110436	3.92834e-05	-25456	1.48741e-05	0.000651061	0.00422507	-236.683
DPP10	4199.98	1.1558e-06	5.77399e-05	3.69353e-05	-27074.4	0.000123032	0.00421194	0.118675	-8.42637
DPP10-AS1	1444	1.10222e-05	0.000452304	1.22973e-05	-81318.4	2.14016e-09	1.60591e-07	0.105278	-9.49863

## Sheet: TOP25 up and down SMARCA4
Gene symbol	Total reads	P-value (SMARCB1_Null vs. Wildtype)	FDR step up (SMARCB1_Null vs. Wildtype)	Ratio (SMARCB1_Null vs. Wildtype)	Fold change (SMARCB1_Null vs. Wildtype)	P-value (SMARCA4_Null vs. Wildtype)	FDR step up (SMARCA4_Null vs. Wildtype)	Ratio (SMARCA4_Null vs. Wildtype)	Fold change (SMARCA4_Null vs. Wildtype)
KSR2	1410	0.120549	0.767903	3.65012	3.65012	1.15517e-07	6.98572e-06	41.0078	41.0078
SEMA3G	1607	0.000127415	0.00385262	11.4304	11.4304	4.47071e-07	2.48307e-05	23.3285	23.3285
ANXA1	118751	0.129205	0.793232	1.43722	1.43722	6.09475e-60	5.09299e-57	21.5124	21.5124
TRIML2	1259	0.000348785	0.00901502	0.000508501	-1966.57	4.99517e-09	3.65862e-07	20.6615	20.6615
ERBB4	4519.99	2.85648e-78	3.75096e-75	54.981	54.981	1.08707e-45	6.44666e-43	19.9579	19.9579
GLIS3	1312.39	1.23042e-11	1.17813e-09	0.192275	-5.20088	7.48997e-22	1.36332e-19	16.6159	16.6159
NEDD9	57791	0.0364484	0.359346	3.06739	3.06739	2.87044e-08	1.89821e-06	14.4412	14.4412
S100A11	11981	0.817936	1	0.921026	-1.08575	1.52367e-16	2.17141e-14	8.65486	8.65486
DDIT4	32103	0.000256806	0.00697358	3.09825	3.09825	5.86401e-13	6.16023e-11	7.82746	7.82746
WNT3	23876	0.969594	1	1.02091	1.02091	2.9738e-06	0.000145014	6.88723	6.88723
H2AFY2	16595	9.76283e-11	8.38691e-09	9.46086	9.46086	3.17113e-07	1.8105e-05	6.16742	6.16742
FMNL1	1251	1.23269e-18	2.00547e-16	4.50837	4.50837	1.24487e-26	2.89693e-24	6.08886	6.08886
LGALS1	5596	0.942363	1	1.03089	1.03089	2.5661e-08	1.70308e-06	6.01141	6.01141
IL6R	810.138	0.0049579	0.0795341	1.95417	1.95417	1.48658e-12	1.49341e-10	5.15498	5.15498
HPSE	30945	0.597486	1	0.761749	-1.31277	2.39612e-05	0.000987674	4.82191	4.82191
PTPN21	6380	5.88741e-61	5.15401e-58	3.50815	3.50815	1.73959e-93	3.5534e-90	4.74459	4.74459
LINC00086	48742.9	0.0933284	0.670076	1.67494	1.67494	1.55139e-08	1.06025e-06	4.5669	4.5669
SERPINA10	1064	0.421983	1	1.25921	1.25921	1.8453e-09	1.39605e-07	4.55737	4.55737
KCNC3	1498.11	7.32313e-13	8.01359e-11	5.59838	5.59838	6.84438e-10	5.42358e-08	4.49509	4.49509
SLC16A3	23402.7	0.440435	1	0.723886	-1.38143	5.61099e-07	3.07001e-05	4.49032	4.49032
MR1	861.999	0.000899108	0.0200354	1.64074	1.64074	3.56506e-22	6.68777e-20	4.4371	4.4371
LOC100506023	870	1.87345e-18	3.02118e-16	5.7969	5.7969	1.16993e-13	1.32766e-11	4.43694	4.43694
SLC17A7	1224	2.00926e-14	2.49583e-12	2.87459	2.87459	6.32215e-28	1.59214e-25	4.40204	4.40204
TMSB4X	43772	4.301e-13	4.82132e-11	0.152151	-6.57241	9.9077e-42	4.92279e-39	4.15404	4.15404
PTRF	72420	0.61641	1	0.872452	-1.1462	8.7712e-12	8.18526e-10	4.11655	4.11655
SPRY2	2226	3.84925e-43	2.14438e-40	0.384134	-2.60326	9.2647e-27	2.18362e-24	0.491014	-2.0366
TMSB15A	17692.2	2.95763e-09	2.17492e-07	0.365036	-2.73945	2.93389e-06	0.00014367	0.488297	-2.04793
ZBTB18	20555.9	4.83848e-08	2.95517e-06	0.494454	-2.02243	1.0666e-08	7.42739e-07	0.473537	-2.11177
C19orf57	1131	9.89606e-31	3.24873e-28	0.489478	-2.04299	7.38452e-35	2.95124e-32	0.46351	-2.15745
ZNF711	81635	3.72034e-11	3.45428e-09	0.229376	-4.35966	3.41226e-07	1.93019e-05	0.399479	-2.50326
GCNT1	1714	2.18018e-22	4.26388e-20	0.243805	-4.10164	5.05755e-13	5.34356e-11	0.375072	-2.66615
NUDT11	58483.8	3.37831e-11	3.16871e-09	0.304998	-3.27871	1.21713e-09	9.40153e-08	0.359226	-2.78376
OTX2	61469.5	4.54915e-18	7.148e-16	0.0905108	-11.0484	9.44141e-12	8.72215e-10	0.338981	-2.95001
FZD8	1390.03	3.71828e-06	0.00017132	0.209244	-4.77911	2.2712e-05	0.000944656	0.262399	-3.81098
COL2A1	72453	6.46019e-08	3.85598e-06	0.292001	-3.42465	5.96921e-09	4.33747e-07	0.238488	-4.19309
EYS	839	6.68988e-11	5.99935e-09	0.325175	-3.07527	1.12926e-15	1.47236e-13	0.223291	-4.47846
ITM2A	103797	4.10865e-43	2.22157e-40	0.0903594	-11.0669	7.33409e-39	3.37075e-36	0.202591	-4.93605
LEPR	2043.97	0.00022	0.00614661	0.386244	-2.58904	1.16237e-09	9.01644e-08	0.113003	-8.84933
PDE11A	1882	1.87624e-12	1.94875e-10	0.059129	-16.9122	3.3266e-10	2.73019e-08	0.110461	-9.05296
DPP10-AS1	1444	1.10222e-05	0.000452304	1.22973e-05	-81318.4	2.14016e-09	1.60591e-07	0.105278	-9.49863
SMARCA4	169255	0.66322	1	0.947229	-1.05571	1.5322e-15	1.98366e-13	0.0915375	-10.9245
RIMS2	2656.98	1.52871e-05	0.000601794	0.00808907	-123.624	2.44768e-06	0.000121946	0.07174	-13.9392
STARD13	1157	5.56012e-30	1.70362e-27	0.0608713	-16.4281	1.03713e-28	2.8039e-26	0.0674885	-14.8173
HCLS1	10051.8	6.42249e-05	0.00213897	0.0363108	-27.54	2.13484e-05	0.000896049	0.0527419	-18.9603
RYR2	1211	4.3873e-10	3.47656e-08	0.156177	-6.40299	1.34961e-25	3.02576e-23	0.0332089	-30.1124
THSD7A	992	5.61432e-07	2.97091e-05	0.0667367	-14.9843	1.2204e-07	7.33195e-06	0.0313948	-31.8524
IGSF1	842	2.30664e-26	5.88963e-24	0.0109805	-91.0706	4.40101e-22	8.17255e-20	0.0216106	-46.2736
ST8SIA4	1296	5.74444e-11	5.22801e-09	0.00889265	-112.452	2.59146e-09	1.92103e-07	0.0139715	-71.5742
PDE10A	2985.98	0.000491686	0.0121053	0.0026391	-378.917	4.13987e-28	1.05705e-25	0.00716614	-139.545
MGAT4C	1099	2.3308e-06	0.000110436	3.92834e-05	-25456	1.48741e-05	0.000651061	0.00422507	-236.683
