# Supplementary material for: Chromatin-Remodeling Complex SWI/SNF Controls Multidrug Resistance by Transcriptionally Regulating the Drug Efflux Pump ABCB1
Source: Oxford University Press journal article supplement (doi:10.1158/0008-5472.can-16-0716), 2016-08-08
Supplement: 00085472can160716-sup-163341_1_supp_0_hb3f4m.xlsx [file 00085472can160716-sup-163341_1_supp_0_hb3f4m.xlsx]

## Sheet: Sheet1
Multiple Comparisons versus Control Group (Holm-Sidak method following One-way ANOVA):
Overall significance level = 0.05
		t value	P value
Figure 1D
Comparison for ABCB1 mRNA levels
Comparison		t	P	P<0.050
WT vs. ABCB1GT4		27.534	<0.001	Yes
WT vs. ABCB1GT3		22.949	<0.001	Yes
WT vs. ABCB1GT1		21.999	<0.001	Yes
WT vs. ABCB1GT2		10.599	<0.001	Yes
Figure 1D
Comparison for TOP2A mRNA levels
Comparison		t	P	P<0.050
WT vs. TOP2AGT1		13.486	<0.001	Yes
Figure 4A
Comparison for ABCB1 mRNA levels
Comparison		t	P	P<0.050
WT vs. SMARCB1CR1		23.872	<0.001	Yes
WT vs. SMARCB1CR2		15.543	<0.001	Yes
WT vs. ARID1ACR1		4.108	0.004	Yes
WT vs. SMARCA4CR2		3.184	0.02	Yes
WT vs. ARID1ACR2		2.454	0.048	Yes
WT vs. SMARCA4CR1		1.605	0.126	No
Figure 4A
Comparison for TOP2A mRNA levels
Comparison		t	P	P<0.050
WT vs. SMARCB1CR1		1.391	0.753	No
WT vs. ARID1ACR1		1.225	0.74	No
WT vs. ARID1ACR2		1.17	0.695	No
WT vs. SMARCB1CR2		0.537	0.935	No
WT vs. SMARCA4CR2		0.284	0.951	No
WT vs. SMARCA4CR1		0.0919	0.928	No
Figure 4B
Comparison for ABCB1 mRNA levels
Comparison		t	P	P<0.050
SMARCB1CR1 vs. SMARCB1CR1;SMARCB1-3xHA		21.674	<0.001	Yes
SMARCB1CR2 vs. SMARCB1CR2;SMARCB1-3xHA		79.151	<0.001	Yes
Figure 4E
Comparison for ABCB1 mRNA levels
Comparison		t	P	P<0.050
NCI-H1650 vs. NCI-H1650-SMARCB1-LentiCR1		62.428	<0.001	Yes
Comparison		t	P	P<0.050
KOPN8 vs. KOPN8-SMARCB1-LentiCR1		22.772	<0.001	Yes
Comparison		t	P	P<0.050
MDA-MB-361 vs. MDA-MB-361-SMARCB1-LentiCR1		19.628	<0.001	Yes
Comparison		t	P	P<0.050
HCC-1954 vs. HCC-1954-SMARCB1-LentiCR1		10.247	<0.001	Yes
Comparison		t	P	P<0.050
PC3 vs. PC3-SMARCB1-LentiCR1		5.565	0.005	Yes
Figure 5F
Comparison for Fold Change in IC50
Comparison		t	P	P<0.050
Vinblastine
WT vs. SMARCB1CR1		7.208	<0.001	Yes
WT vs. SMARCB1CR2		5.635	<0.001	Yes
Paclitaxel
WT vs. SMARCB1CR1		5.054	0.001	Yes
WT vs. SMARCB1CR2		2.808	0.02	Yes
Etoposide
WT vs. SMARCB1CR1		6.711	<0.001	Yes
WT vs. SMARCB1CR2		3.461	0.007	Yes
Doxorubicin
WT vs. SMARCB1CR1		10.892	<0.001	Yes
WT vs. SMARCB1CR2		10.597	<0.001	Yes
Carboplatin
WT vs. SMARCB1CR1		0.484	0.637	No
WT vs. SMARCB1CR2		0.825	0.67	No
Figure 6A
Comparison for ABCB1 mRNA levels
Comparison		t	P	P<0.050
SMARCB1CR1 vs. SMARCB1CR1;SMARCA4CR2		13.855	<0.001	Yes
Figure 6E
Comparison for ABCB1 mRNA levels
Comparison		t	P	P<0.050
FLAG-SMARCA4 (-) vs FLAG-SMARCA4 (+)		18.441	<0.001	Yes
