# Supplementary material for: Chromatin-Remodeling Complex SWI/SNF Controls Multidrug Resistance by Transcriptionally Regulating the Drug Efflux Pump ABCB1
Source: Oxford University Press journal article supplement (doi:10.1158/0008-5472.can-16-0716), 2016-08-08
Supplement: 00085472can160716-sup-163341_1_supp_0_rb3f3r.xlsx [file 00085472can160716-sup-163341_1_supp_0_rb3f3r.xlsx]

## Sheet: expExonSenseIntronVScontrol.sta
Screen	Gene symbol	Unique insertions in selected population	Total insertions in selected population	Unique insertions in control population	Total insertions in control population	p-value	p-value fdr corrected	Screen	Gene symbol	SENSE_EXON	SENSE_INTRON	ANTRISENSE_EXON	ANTRISENSE_INTRON	Insertion bias index
DOX17againstowncontroln2	TOP2A	154	132054	15	484438	2.76245e-84	3.67406e-80	TOP2A	DOX17againstowncontroln2	28	115	11	89	0.633745
DOX17againstowncontroln2	SMARCB1	63	132054	14	484438	2.14636e-29	1.42733e-25	SMARCB1	DOX17againstowncontroln2	4	55	4	3	0.954545
DOX17againstowncontroln2	ABCB1	96	132054	76	484438	9.36074e-23	4.14993e-19	ABCB1	DOX17againstowncontroln2	8	64	24	515	0.157119
DOX17againstowncontroln2	ARID1A	82	132054	60	484438	6.02428e-21	2.00307e-17	ARID1A	DOX17againstowncontroln2	17	55	10	12	0.87234
DOX17againstowncontroln2	TADA3	37	132054	14	484438	8.57586e-15	2.28118e-11	TADA3	DOX17againstowncontroln2	4	32	1	1	0.973684
DOX17againstowncontroln2	SMARCE1	55	132054	41	484438	2.34143e-14	5.19017e-11	SMARCE1	DOX17againstowncontroln2	0	55	0	6	0.901639
DOX17againstowncontroln2	SMARCA4	82	132054	92	484438	4.90953e-14	9.32811e-11	SMARCA4	DOX17againstowncontroln2	0	82	0	19	0.811881
DOX17againstowncontroln2	SMARCC1	92	132054	120	484438	6.588e-13	1.09525e-09	SMARCC1	DOX17againstowncontroln2	5	84	3	22	0.807018
DOX17againstowncontroln2	NSD1	103	132054	148	484438	2.00661e-12	2.96532e-09	NSD1	DOX17againstowncontroln2	36	59	8	16	0.865546
DOX17againstowncontroln2	TAF6L	32	132054	15	484438	8.90716e-12	1.18465e-08	TAF6L	DOX17againstowncontroln2	5	26	1	11	0.744186
DOX17againstowncontroln2	CHMP5	22	132054	4	484438	1.13608e-11	1.37362e-08	CHMP5	DOX17againstowncontroln2	0	21	1	0	1
DOX17againstowncontroln2	MALAT1	118	132054	196	484438	5.21732e-11	5.78253e-08	MALAT1	DOX17againstowncontroln2	56	0	62	0	1
DOX17againstowncontroln2	HGS	40	132054	31	484438	1.55106e-10	1.58685e-07	HGS	DOX17againstowncontroln2	2	36	2	1	0.97561
DOX17againstowncontroln2	C1orf213	93	132054	142	484438	2.31372e-10	2.19803e-07	C1orf213	DOX17againstowncontroln2	49	0	44	0	1
DOX17againstowncontroln2	FLJ37453	93	132054	151	484438	2.27614e-09	2.01818e-06	FLJ37453	DOX17againstowncontroln2	49	12	32	9	0.911765
DOX17againstowncontroln2	UBAP1	63	132054	84	484438	4.5583e-09	3.78909e-06	UBAP1	DOX17againstowncontroln2	1	62	0	20	0.759036
DOX17againstowncontroln2	PARN	127	132054	242	484438	6.31869e-09	4.94344e-06	PARN	DOX17againstowncontroln2	6	117	4	62	0.671958
DOX17againstowncontroln2	C1orf115	15	132054	2	484438	7.97247e-09	5.89077e-06	C1orf115	DOX17againstowncontroln2	1	11	3	0	1
DOX17againstowncontroln2	XPO1	54	132054	67	484438	1.01614e-08	7.11296e-06	XPO1	DOX17againstowncontroln2	32	10	12	7	0.885246
DOX17againstowncontroln2	TADA2B	21	132054	10	484438	4.01875e-08	2.67247e-05	TADA2B	DOX17againstowncontroln2	1	20	0	2	0.913043
DOX17againstowncontroln2	SLTM	55	132054	76	484438	9.67796e-08	6.12938e-05	SLTM	DOX17againstowncontroln2	5	48	2	18	0.753425
DOX17againstowncontroln2	LOC100216545	53	132054	72	484438	1.11278e-07	6.72729e-05	LOC100216545	DOX17againstowncontroln2	27	0	26	0	1
DOX17againstowncontroln2	C11orf30	101	132054	195	484438	3.25714e-07	0.000188348	C11orf30	DOX17againstowncontroln2	14	77	10	48	0.677852
DOX17againstowncontroln2	NAA30	15	132054	6	484438	1.3022e-06	0.000721636	NAA30	DOX17againstowncontroln2	6	8	1	1	0.9375
DOX17againstowncontroln2	ILF3	51	132054	78	484438	2.40967e-06	0.00128195	ILF3	DOX17againstowncontroln2	3	48	0	10	0.836066
DOX17againstowncontroln2	HEXIM1	40	132054	54	484438	3.38842e-06	0.0016761	HEXIM1	DOX17againstowncontroln2	13	0	27	0	1
DOX17againstowncontroln2	MIP	44	132054	63	484438	3.4026e-06	0.0016761	MIP	DOX17againstowncontroln2	22	0	22	1	0.977778
DOX17againstowncontroln2	C15orf34	25	132054	25	484438	7.65316e-06	0.00363525	C15orf34	DOX17againstowncontroln2	12	0	13	0	1
DOX17againstowncontroln2	EIF1AD	21	132054	18	484438	9.217e-06	0.0042193	EIF1AD	DOX17againstowncontroln2	1	19	1	2	0.913043
DOX17againstowncontroln2	SP3	34	132054	44	484438	9.51722e-06	0.0042193	SP3	DOX17againstowncontroln2	2	30	2	4	0.894737
DOX17againstowncontroln2	CCDC101	18	132054	13	484438	9.89989e-06	0.00424737	CCDC101	DOX17againstowncontroln2	0	18	0	0	1
DOX17againstowncontroln2	C10orf95	30	132054	36	484438	1.14431e-05	0.00475606	C10orf95	DOX17againstowncontroln2	17	1	12	0	1
DOX17againstowncontroln2	ALDOA	67	132054	125	484438	1.22255e-05	0.00492726	ALDOA	DOX17againstowncontroln2	14	40	13	26	0.72043
DOX17againstowncontroln2	ADNP	46	132054	73	484438	1.45811e-05	0.00570377	ADNP	DOX17againstowncontroln2	1	45	0	9	0.836364
DOX17againstowncontroln2	OMG	127	132054	294	484438	1.68466e-05	0.00640171	OMG	DOX17againstowncontroln2	50	11	66	12	0.913669
DOX17againstowncontroln2	EDC4	23	132054	24	484438	2.74204e-05	0.0101303	EDC4	DOX17againstowncontroln2	0	23	0	6	0.793103
DOX17againstowncontroln2	FAM48A	15	132054	10	484438	3.22566e-05	0.0115949	FAM48A	DOX17againstowncontroln2	0	15	0	3	0.833333
DOX17againstowncontroln2	DKFZP686I15217	47	132054	79	484438	3.46914e-05	0.012142	DKFZP686I15217	DOX17againstowncontroln2	22	2	23	6	0.886792
DOX17againstowncontroln2	LRRC8B	90	132054	194	484438	3.67849e-05	0.0125446	LRRC8B	DOX17againstowncontroln2	46	19	25	20	0.818182
DOX17againstowncontroln2	RAB10	25	132054	29	484438	4.10539e-05	0.0136504	RAB10	DOX17againstowncontroln2	3	20	2	10	0.714286
DOX17againstowncontroln2	SOX21	20	132054	20	484438	6.14415e-05	0.0197205	SOX21	DOX17againstowncontroln2	11	0	9	0	1
DOX17againstowncontroln2	HSPC159	74	132054	153	484438	6.22754e-05	0.0197205	HSPC159	DOX17againstowncontroln2	31	10	33	10	0.880952
DOX17againstowncontroln2	ATIC	16	132054	13	484438	7.27978e-05	0.0220278	ATIC	DOX17againstowncontroln2	4	7	5	2	0.888889
DOX17againstowncontroln2	ZNF236	28	132054	37	484438	7.28739e-05	0.0220278	ZNF236	DOX17againstowncontroln2	10	15	3	5	0.848485
DOX17againstowncontroln2	SLC1A5	46	132054	80	484438	7.67032e-05	0.02267	SLC1A5	DOX17againstowncontroln2	9	31	6	19	0.707692
DOX17againstowncontroln2	FLJ13224	30	132054	42	484438	8.64882e-05	0.0250064	FLJ13224	DOX17againstowncontroln2	7	0	23	0	1
DOX17againstowncontroln2	TAF9	23	132054	27	484438	9.32474e-05	0.026387	TAF9	DOX17againstowncontroln2	0	23	0	5	0.821429
DOX17againstowncontroln2	ANKLE1	21	132054	23	484438	9.6377e-05	0.0267045	ANKLE1	DOX17againstowncontroln2	4	11	6	9	0.7
DOX17againstowncontroln2	KEAP1	47	132054	84	484438	0.000105189	0.0285514	KEAP1	DOX17againstowncontroln2	7	39	1	30	0.61039
DOX17againstowncontroln2	THTPA	25	132054	32	484438	0.000122683	0.0319939	THTPA	DOX17againstowncontroln2	14	4	7	1	0.961538
DOX17againstowncontroln2	ZFR	25	132054	32	484438	0.000122683	0.0319939	ZFR	DOX17againstowncontroln2	0	24	1	7	0.78125
DOX17againstowncontroln2	HOXB3	58	132054	114	484438	0.000131826	0.0330777	HOXB3	DOX17againstowncontroln2	26	10	22	5	0.920635
DOX17againstowncontroln2	NCRNA00099	7	132054	1	484438	0.000134521	0.0330777	NCRNA00099	DOX17againstowncontroln2	2	0	5	0	1
DOX17againstowncontroln2	ZNF384	17	132054	16	484438	0.000135604	0.0330777	ZNF384	DOX17againstowncontroln2	4	9	4	3	0.85
DOX17againstowncontroln2	NASP	13	132054	9	484438	0.000136787	0.0330777	NASP	DOX17againstowncontroln2	0	11	2	2	0.866667
DOX17againstowncontroln2	C17orf104	11	132054	6	484438	0.000146218	0.0347268	C17orf104	DOX17againstowncontroln2	2	7	2	3	0.785714
DOX17againstowncontroln2	PPRC1	38	132054	63	484438	0.000150544	0.035127	PPRC1	DOX17againstowncontroln2	2	35	1	10	0.791667
DOX17againstowncontroln2	SH3BP2	69	132054	145	484438	0.000155289	0.0356093	SH3BP2	DOX17againstowncontroln2	29	15	25	22	0.758242
DOX17againstowncontroln2	KAT2A	15	132054	13	484438	0.000190353	0.0423301	KAT2A	DOX17againstowncontroln2	6	1	8	4	0.789474
DOX17againstowncontroln2	TADA2A	40	132054	69	484438	0.000190963	0.0423301	TADA2A	DOX17againstowncontroln2	4	32	4	13	0.754717
DOX17againstowncontroln2	TTC15	10	132054	5	484438	0.000207874	0.0453233	TTC15	DOX17againstowncontroln2	0	10	0	3	0.769231
DOX17againstowncontroln2	ATN1	47	132054	89	484438	0.000287526	0.0610696	ATN1	DOX17againstowncontroln2	4	32	11	25	0.652778
DOX17againstowncontroln2	NDUFV3	9	132054	4	484438	0.000289277	0.0610696	NDUFV3	DOX17againstowncontroln2	0	8	1	1	0.9
DOX17againstowncontroln2	BMF	110	132054	269	484438	0.00030536	0.0634576	BMF	DOX17againstowncontroln2	25	57	28	47	0.700637
DOX17againstowncontroln2	CCDC38	15	132054	14	484438	0.000316306	0.064721	CCDC38	DOX17againstowncontroln2	2	11	2	5	0.75
DOX17againstowncontroln2	TAF12	19	132054	22	484438	0.000330955	0.0661092	TAF12	DOX17againstowncontroln2	3	12	4	27	0.413043
DOX17againstowncontroln2	THAP4	33	132054	54	484438	0.000333031	0.0661092	THAP4	DOX17againstowncontroln2	0	32	1	14	0.702128
DOX17againstowncontroln2	IL17RE	17	132054	18	484438	0.000338229	0.0661536	IL17RE	DOX17againstowncontroln2	9	1	7	2	0.894737
DOX17againstowncontroln2	MAZ	42	132054	77	484438	0.00035453	0.0683368	MAZ	DOX17againstowncontroln2	15	16	11	9	0.823529
DOX17againstowncontroln2	RANBP3	38	132054	67	484438	0.00037508	0.0712652	RANBP3	DOX17againstowncontroln2	0	38	0	26	0.59375
DOX17againstowncontroln2	UNC5CL	12	132054	9	484438	0.000383028	0.0717503	UNC5CL	DOX17againstowncontroln2	6	2	4	0	1
DOX17againstowncontroln2	TAF13	10	132054	6	484438	0.000447541	0.0826708	TAF13	DOX17againstowncontroln2	0	10	0	1	0.909091
DOX17againstowncontroln2	LOC147727	36	132054	63	484438	0.000474592	0.0864667	LOC147727	DOX17againstowncontroln2	18	0	18	0	1
DOX17againstowncontroln2	KDM1B	7	132054	2	484438	0.000492295	0.0884801	KDM1B	DOX17againstowncontroln2	2	4	1	1	0.875
DOX17againstowncontroln2	GOLGA2	6	132054	1	484438	0.000552071	0.0966124	GOLGA2	DOX17againstowncontroln2	0	6	0	3	0.666667
DOX17againstowncontroln2	KCNJ5	6	132054	1	484438	0.000552071	0.0966124	KCNJ5	DOX17againstowncontroln2	0	4	2	1	0.857143
DOX17againstowncontroln2	IMP3	34	132054	59	484438	0.000600179	0.102554	IMP3	DOX17againstowncontroln2	20	0	14	0	1
DOX17againstowncontroln2	FAM108C1	59	132054	126	484438	0.000602278	0.102554	FAM108C1	DOX17againstowncontroln2	18	24	17	31	0.655556
DOX17againstowncontroln2	RQCD1	21	132054	28	484438	0.000609153	0.102554	RQCD1	DOX17againstowncontroln2	0	21	0	5	0.807692
DOX17againstowncontroln2	PARP12	12	132054	10	484438	0.000678516	0.111388	PARP12	DOX17againstowncontroln2	6	4	2	2	0.857143
DOX17againstowncontroln2	ETNK1	19	132054	24	484438	0.000693448	0.111388	ETNK1	DOX17againstowncontroln2	3	16	0	7	0.730769
DOX17againstowncontroln2	GRRP1	19	132054	24	484438	0.000693448	0.111388	GRRP1	DOX17againstowncontroln2	4	2	13	2	0.904762
DOX17againstowncontroln2	JUNB	26	132054	40	484438	0.000703501	0.111388	JUNB	DOX17againstowncontroln2	14	0	12	0	1
DOX17againstowncontroln2	LOC100128191	26	132054	40	484438	0.000703501	0.111388	LOC100128191	DOX17againstowncontroln2	14	0	12	2	0.928571
DOX17againstowncontroln2	EIF4G2	14	132054	14	484438	0.000778321	0.117991	EIF4G2	DOX17againstowncontroln2	4	8	2	2	0.875
DOX17againstowncontroln2	LOC645676	14	132054	14	484438	0.000778321	0.117991	LOC645676	DOX17againstowncontroln2	8	0	6	0	1
DOX17againstowncontroln2	LSMD1	16	132054	18	484438	0.000782298	0.117991	LSMD1	DOX17againstowncontroln2	6	1	9	5	0.761905
DOX17againstowncontroln2	TAF3	16	132054	18	484438	0.000782298	0.117991	TAF3	DOX17againstowncontroln2	3	13	0	2	0.888889
DOX17againstowncontroln2	LOC400027	15	132054	16	484438	0.000789565	0.117991	LOC400027	DOX17againstowncontroln2	5	0	10	0	1
DOX17againstowncontroln2	SLC3A2	73	132054	168	484438	0.00079918	0.118101	SLC3A2	DOX17againstowncontroln2	8	52	13	49	0.598361
DOX17againstowncontroln2	ARHGAP18	40	132054	76	484438	0.000817221	0.11944	ARHGAP18	DOX17againstowncontroln2	0	39	1	16	0.714286
DOX17againstowncontroln2	FIGN	41	132054	79	484438	0.000873135	0.124228	FIGN	DOX17againstowncontroln2	0	40	1	24	0.630769
DOX17againstowncontroln2	PCNP	10	132054	7	484438	0.000878003	0.124228	PCNP	DOX17againstowncontroln2	0	9	1	3	0.769231
DOX17againstowncontroln2	VGF	10	132054	7	484438	0.000878003	0.124228	VGF	DOX17againstowncontroln2	6	0	4	0	1
DOX17againstowncontroln2	RALGAPB	19	132054	25	484438	0.000977098	0.136794	RALGAPB	DOX17againstowncontroln2	0	19	0	5	0.791667
DOX17againstowncontroln2	PHF12	40	132054	77	484438	0.000987612	0.136825	PHF12	DOX17againstowncontroln2	5	29	6	7	0.851064
DOX17againstowncontroln2	LOC100129387	44	132054	88	484438	0.00103531	0.139702	LOC100129387	DOX17againstowncontroln2	22	0	22	0	1
DOX17againstowncontroln2	ANKRD52	11	132054	9	484438	0.00103989	0.139702	ANKRD52	DOX17againstowncontroln2	3	7	1	2	0.846154
DOX17againstowncontroln2	LOC283392	11	132054	9	484438	0.00103989	0.139702	LOC283392	DOX17againstowncontroln2	3	6	2	1	0.916667
DOX17againstowncontroln2	YDJC	31	132054	54	484438	0.00106909	0.142189	YDJC	DOX17againstowncontroln2	14	13	4	7	0.815789
DOX17againstowncontroln2	LOC150381	86	132054	209	484438	0.00109994	0.144844	LOC150381	DOX17againstowncontroln2	19	52	15	53	0.618705
DOX17againstowncontroln2	HEATR2	12	132054	11	484438	0.0011429	0.149025	HEATR2	DOX17againstowncontroln2	1	11	0	1	0.923077
DOX17againstowncontroln2	SLC38A9	43	132054	86	484438	0.00117151	0.150056	SLC38A9	DOX17againstowncontroln2	14	15	14	6	0.877551
DOX17againstowncontroln2	ZMYM3	26	132054	42	484438	0.00118557	0.150056	ZMYM3	DOX17againstowncontroln2	13	3	10	7	0.787879
DOX17againstowncontroln2	C13orf16	13	132054	13	484438	0.00119594	0.150056	C13orf16	DOX17againstowncontroln2	0	13	0	2	0.866667
DOX17againstowncontroln2	PRICKLE4	13	132054	13	484438	0.00119594	0.150056	PRICKLE4	DOX17againstowncontroln2	4	6	3	4	0.764706
DOX17againstowncontroln2	NBEAL2	14	132054	15	484438	0.00120953	0.150344	NBEAL2	DOX17againstowncontroln2	0	13	1	6	0.7
DOX17againstowncontroln2	TERT	9	132054	6	484438	0.0013267	0.160822	TERT	DOX17againstowncontroln2	1	1	7	0	1
DOX17againstowncontroln2	TUG1	9	132054	6	484438	0.0013267	0.160822	TUG1	DOX17againstowncontroln2	5	0	4	0	1
DOX17againstowncontroln2	JMJD8	7	132054	3	484438	0.0013357	0.160822	JMJD8	DOX17againstowncontroln2	3	2	2	1	0.875
DOX17againstowncontroln2	TICAM1	39	132054	76	484438	0.00134519	0.160822	TICAM1	DOX17againstowncontroln2	18	7	14	6	0.866667
DOX17againstowncontroln2	GPATCH3	19	132054	26	484438	0.00135429	0.160822	GPATCH3	DOX17againstowncontroln2	6	5	8	4	0.826087
DOX17againstowncontroln2	COPS7A	22	132054	33	484438	0.00138883	0.162692	COPS7A	DOX17againstowncontroln2	8	8	6	3	0.88
DOX17againstowncontroln2	MIB1	47	132054	98	484438	0.0013945	0.162692	MIB1	DOX17againstowncontroln2	2	43	2	12	0.79661
DOX17againstowncontroln2	TAF11	18	132054	24	484438	0.00146329	0.169232	TAF11	DOX17againstowncontroln2	0	18	0	1	0.947368
DOX17againstowncontroln2	SMG1	28	132054	48	484438	0.00152471	0.174816	SMG1	DOX17againstowncontroln2	16	0	12	0	1
DOX17againstowncontroln2	TAPT1	17	132054	22	484438	0.0015702	0.176977	TAPT1	DOX17againstowncontroln2	1	15	1	8	0.68
DOX17againstowncontroln2	CUL4B	42	132054	85	484438	0.0015756	0.176977	CUL4B	DOX17againstowncontroln2	6	29	7	21	0.666667
DOX17againstowncontroln2	SLC12A9	10	132054	8	484438	0.00159679	0.176977	SLC12A9	DOX17againstowncontroln2	5	2	3	0	1
DOX17againstowncontroln2	ZNF217	10	132054	8	484438	0.00159679	0.176977	ZNF217	DOX17againstowncontroln2	5	2	3	0	1
DOX17againstowncontroln2	E2F3	16	132054	20	484438	0.00167048	0.183615	E2F3	DOX17againstowncontroln2	4	10	2	8	0.666667
DOX17againstowncontroln2	SKIV2L	11	132054	10	484438	0.00176244	0.190572	SKIV2L	DOX17againstowncontroln2	2	8	1	2	0.846154
DOX17againstowncontroln2	TADA1	11	132054	10	484438	0.00176244	0.190572	TADA1	DOX17againstowncontroln2	0	11	0	0	1
DOX17againstowncontroln2	FAM43A	6	132054	2	484438	0.00180472	0.191428	FAM43A	DOX17againstowncontroln2	3	0	3	0	1
DOX17againstowncontroln2	PRELP	6	132054	2	484438	0.00180472	0.191428	PRELP	DOX17againstowncontroln2	2	1	3	0	1
DOX17againstowncontroln2	CCDC106	14	132054	16	484438	0.00182368	0.191428	CCDC106	DOX17againstowncontroln2	5	4	5	3	0.823529
DOX17againstowncontroln2	GATAD1	13	132054	14	484438	0.00185671	0.191428	GATAD1	DOX17againstowncontroln2	1	10	2	5	0.722222
DOX17againstowncontroln2	LRRK2	13	132054	14	484438	0.00185671	0.191428	LRRK2	DOX17againstowncontroln2	3	7	3	2	0.866667
DOX17againstowncontroln2	PHF5A	13	132054	14	484438	0.00185671	0.191428	PHF5A	DOX17againstowncontroln2	2	9	2	8	0.619048
DOX17againstowncontroln2	KAZALD1	59	132054	134	484438	0.00187296	0.191618	KAZALD1	DOX17againstowncontroln2	16	18	25	18	0.766234
DOX17againstowncontroln2	RPS25	26	132054	44	484438	0.00192938	0.195883	RPS25	DOX17againstowncontroln2	2	23	1	26	0.5
DOX17againstowncontroln2	LENG9	8	132054	5	484438	0.00199846	0.199846	LENG9	DOX17againstowncontroln2	4	0	4	0	1
DOX17againstowncontroln2	PDCD2	8	132054	5	484438	0.00199846	0.199846	PDCD2	DOX17againstowncontroln2	0	8	0	0	1
DOX17againstowncontroln2	USP22	21	132054	32	484438	0.00203108	0.201593	USP22	DOX17againstowncontroln2	3	15	3	13	0.617647
DOX17againstowncontroln2	CDKN1C	4	132054	0	484438	0.00210534	0.207415	CDKN1C	DOX17againstowncontroln2	2	0	2	0	1
DOX17againstowncontroln2	PPTC7	25	132054	42	484438	0.00216917	0.212132	PPTC7	DOX17againstowncontroln2	9	8	8	13	0.657895
DOX17againstowncontroln2	CLK3	33	132054	63	484438	0.00235395	0.226117	CLK3	DOX17againstowncontroln2	13	11	9	8	0.804878
DOX17againstowncontroln2	KILLIN	16	132054	21	484438	0.00236318	0.226117	KILLIN	DOX17againstowncontroln2	7	0	9	0	1
DOX17againstowncontroln2	PRSS30P	16	132054	21	484438	0.00236318	0.226117	PRSS30P	DOX17againstowncontroln2	10	0	6	0	1
DOX17againstowncontroln2	WDR90	28	132054	50	484438	0.00238042	0.22614	WDR90	DOX17againstowncontroln2	11	7	10	4	0.875
DOX17againstowncontroln2	ATXN3	26	132054	45	484438	0.00243126	0.226462	ATXN3	DOX17againstowncontroln2	12	2	12	0	1
DOX17againstowncontroln2	LOC100289341	26	132054	45	484438	0.00243126	0.226462	LOC100289341	DOX17againstowncontroln2	18	0	8	0	1
DOX17againstowncontroln2	OGT	37	132054	74	484438	0.00247158	0.226462	OGT	DOX17againstowncontroln2	6	27	4	18	0.672727
DOX17againstowncontroln2	C9orf23	19	132054	28	484438	0.00248598	0.226462	C9orf23	DOX17againstowncontroln2	4	11	4	6	0.76
DOX17againstowncontroln2	HAGHL	19	132054	28	484438	0.00248598	0.226462	HAGHL	DOX17againstowncontroln2	6	6	7	4	0.826087
DOX17againstowncontroln2	LRRC14	19	132054	28	484438	0.00248598	0.226462	LRRC14	DOX17againstowncontroln2	15	1	3	0	1
DOX17againstowncontroln2	MED27	71	132054	172	484438	0.00262101	0.237139	MED27	DOX17againstowncontroln2	0	71	0	41	0.633929
DOX17againstowncontroln2	INO80D	14	132054	17	484438	0.00267531	0.238803	INO80D	DOX17againstowncontroln2	1	6	7	5	0.736842
DOX17againstowncontroln2	LOC401093	14	132054	17	484438	0.00267531	0.238803	LOC401093	DOX17againstowncontroln2	7	0	7	2	0.875
DOX17againstowncontroln2	ARHGAP21	39	132054	80	484438	0.00271024	0.239566	ARHGAP21	DOX17againstowncontroln2	0	39	0	27	0.590909
DOX17againstowncontroln2	ATP8B3	10	132054	9	484438	0.00272641	0.239566	ATP8B3	DOX17againstowncontroln2	2	6	2	0	1
DOX17againstowncontroln2	VEGFA	18	132054	26	484438	0.0027379	0.239566	VEGFA	DOX17againstowncontroln2	0	16	2	12	0.6
DOX17againstowncontroln2	SPEF2	30	132054	56	484438	0.00281548	0.244744	SPEF2	DOX17againstowncontroln2	1	28	1	11	0.731707
DOX17againstowncontroln2	POU1F1	11	132054	11	484438	0.00284635	0.245822	POU1F1	DOX17againstowncontroln2	3	6	2	4	0.733333
DOX17againstowncontroln2	SLC30A4	28	132054	51	484438	0.00294348	0.251233	SLC30A4	DOX17againstowncontroln2	8	10	10	7	0.8
DOX17againstowncontroln2	KIAA1377	20	132054	31	484438	0.00296491	0.251233	KIAA1377	DOX17againstowncontroln2	0	19	1	8	0.714286
DOX17againstowncontroln2	DPH2	7	132054	4	484438	0.00299255	0.251233	DPH2	DOX17againstowncontroln2	0	3	4	0	1
DOX17againstowncontroln2	IRF5	7	132054	4	484438	0.00299255	0.251233	IRF5	DOX17againstowncontroln2	1	6	0	1	0.875
DOX17againstowncontroln2	TPI1P2	17	132054	24	484438	0.00300346	0.251233	TPI1P2	DOX17againstowncontroln2	9	0	8	0	1
DOX17againstowncontroln2	TBC1D5	52	132054	118	484438	0.00328757	0.273279	TBC1D5	DOX17againstowncontroln2	10	36	6	26	0.666667
DOX17againstowncontroln2	SC65	18	132054	27	484438	0.0036603	0.302372	SC65	DOX17againstowncontroln2	6	5	7	1	0.947368
DOX17againstowncontroln2	ZFHX4	26	132054	47	484438	0.00377267	0.3056	ZFHX4	DOX17againstowncontroln2	3	22	1	17	0.604651
DOX17againstowncontroln2	HEATR5A	8	132054	6	484438	0.0037892	0.3056	HEATR5A	DOX17againstowncontroln2	0	8	0	7	0.533333
DOX17againstowncontroln2	HOXA13	8	132054	6	484438	0.0037892	0.3056	HOXA13	DOX17againstowncontroln2	4	1	3	1	0.888889
DOX17againstowncontroln2	EXOSC1	14	132054	18	484438	0.00382781	0.3056	EXOSC1	DOX17againstowncontroln2	0	14	0	7	0.666667
DOX17againstowncontroln2	LOC100130557	14	132054	18	484438	0.00382781	0.3056	LOC100130557	DOX17againstowncontroln2	6	0	8	0	1
DOX17againstowncontroln2	C12orf61	20	132054	32	484438	0.00386022	0.3056	C12orf61	DOX17againstowncontroln2	11	0	9	0	1
DOX17againstowncontroln2	C5orf44	20	132054	32	484438	0.00386022	0.3056	C5orf44	DOX17againstowncontroln2	3	14	3	9	0.689655
DOX17againstowncontroln2	HYAL1	29	132054	55	484438	0.00388924	0.306076	HYAL1	DOX17againstowncontroln2	15	0	14	3	0.90625
DOX17againstowncontroln2	GPI	17	132054	25	484438	0.00405078	0.31506	GPI	DOX17againstowncontroln2	4	6	7	4	0.809524
DOX17againstowncontroln2	GSK3B	17	132054	25	484438	0.00405078	0.31506	GSK3B	DOX17againstowncontroln2	4	13	0	4	0.809524
DOX17againstowncontroln2	CCDC137	13	132054	16	484438	0.00407652	0.315219	CCDC137	DOX17againstowncontroln2	2	10	1	7	0.65
DOX17againstowncontroln2	RALGAPA1	42	132054	91	484438	0.00411266	0.316176	RALGAPA1	DOX17againstowncontroln2	0	42	0	23	0.646154
DOX17againstowncontroln2	CCDC85B	9	132054	8	484438	0.00423347	0.321648	CCDC85B	DOX17againstowncontroln2	6	0	3	0	1
DOX17againstowncontroln2	HPS6	9	132054	8	484438	0.00423347	0.321648	HPS6	DOX17againstowncontroln2	3	0	6	0	1
DOX17againstowncontroln2	SYNGAP1	25	132054	45	484438	0.0042722	0.321648	SYNGAP1	DOX17againstowncontroln2	1	22	2	13	0.657895
DOX17againstowncontroln2	CNOT3	12	132054	14	484438	0.00428058	0.321648	CNOT3	DOX17againstowncontroln2	1	11	0	4	0.75
DOX17againstowncontroln2	AHSA2	19	132054	30	484438	0.00431913	0.322721	AHSA2	DOX17againstowncontroln2	9	4	6	1	0.95
DOX17againstowncontroln2	SLC4A1AP	11	132054	12	484438	0.00440786	0.3237	SLC4A1AP	DOX17againstowncontroln2	3	2	6	1	0.916667
DOX17againstowncontroln2	MFI2	10	132054	10	484438	0.00441292	0.3237	MFI2	DOX17againstowncontroln2	2	8	0	6	0.625
DOX17againstowncontroln2	AMPD2	6	132054	3	484438	0.00442958	0.3237	AMPD2	DOX17againstowncontroln2	3	2	1	3	0.666667
DOX17againstowncontroln2	ZNF266	6	132054	3	484438	0.00442958	0.3237	ZNF266	DOX17againstowncontroln2	0	4	2	1	0.857143
DOX17againstowncontroln2	TMEM26	64	132054	156	484438	0.00455813	0.331274	TMEM26	DOX17againstowncontroln2	14	39	11	26	0.711111
DOX17againstowncontroln2	MINA	15	132054	21	484438	0.00490413	0.354483	MINA	DOX17againstowncontroln2	0	13	2	6	0.714286
DOX17againstowncontroln2	ANKRD17	30	132054	59	484438	0.00499911	0.359395	ANKRD17	DOX17againstowncontroln2	2	28	0	15	0.666667
DOX17againstowncontroln2	C11orf41	58	132054	139	484438	0.00504852	0.360996	C11orf41	DOX17againstowncontroln2	26	3	29	2	0.966667
DOX17againstowncontroln2	C19orf54	34	132054	70	484438	0.00508051	0.361341	C19orf54	DOX17againstowncontroln2	12	8	14	12	0.73913
DOX17againstowncontroln2	HOXA7	14	132054	19	484438	0.00535307	0.378605	HOXA7	DOX17againstowncontroln2	4	1	9	7	0.666667
DOX17againstowncontroln2	LAMB2	17	132054	26	484438	0.00538018	0.378605	LAMB2	DOX17againstowncontroln2	4	2	11	3	0.85
DOX17againstowncontroln2	PATZ1	32	132054	65	484438	0.00552596	0.386817	PATZ1	DOX17againstowncontroln2	14	11	7	7	0.820513
DOX17againstowncontroln2	C3orf71	19	132054	31	484438	0.0055873	0.387539	C3orf71	DOX17againstowncontroln2	10	0	9	0	1
DOX17againstowncontroln2	C14orf176	38	132054	82	484438	0.00580864	0.387539	C14orf176	DOX17againstowncontroln2	13	15	10	8	0.826087
DOX17againstowncontroln2	SEC14L2	38	132054	82	484438	0.00580864	0.387539	SEC14L2	DOX17againstowncontroln2	19	2	17	2	0.95
DOX17againstowncontroln2	ARL16	7	132054	5	484438	0.00585679	0.387539	ARL16	DOX17againstowncontroln2	0	6	1	1	0.875
DOX17againstowncontroln2	CCDC163P	7	132054	5	484438	0.00585679	0.387539	CCDC163P	DOX17againstowncontroln2	6	1	0	4	0.636364
DOX17againstowncontroln2	DDX1	7	132054	5	484438	0.00585679	0.387539	DDX1	DOX17againstowncontroln2	1	5	1	3	0.7
DOX17againstowncontroln2	FASAS	7	132054	5	484438	0.00585679	0.387539	FASAS	DOX17againstowncontroln2	3	0	4	0	1
DOX17againstowncontroln2	HEATR5B	7	132054	5	484438	0.00585679	0.387539	HEATR5B	DOX17againstowncontroln2	0	7	0	0	1
DOX17againstowncontroln2	HSD11B1L	7	132054	5	484438	0.00585679	0.387539	HSD11B1L	DOX17againstowncontroln2	3	3	1	0	1
DOX17againstowncontroln2	RAPGEFL1	7	132054	5	484438	0.00585679	0.387539	RAPGEFL1	DOX17againstowncontroln2	6	0	1	0	1
DOX17againstowncontroln2	TM4SF1	7	132054	5	484438	0.00585679	0.387539	TM4SF1	DOX17againstowncontroln2	2	5	0	3	0.7
DOX17againstowncontroln2	EPC1	46	132054	105	484438	0.00589288	0.387996	EPC1	DOX17againstowncontroln2	6	38	2	35	0.567901
DOX17againstowncontroln2	TAL1	24	132054	44	484438	0.00598283	0.390173	TAL1	DOX17againstowncontroln2	5	19	0	12	0.666667
DOX17againstowncontroln2	CHST14	16	132054	24	484438	0.00598461	0.390173	CHST14	DOX17againstowncontroln2	13	0	3	0	1
DOX17againstowncontroln2	C9orf86	50	132054	117	484438	0.00614831	0.398891	C9orf86	DOX17againstowncontroln2	4	45	1	25	0.666667
DOX17againstowncontroln2	PAN3	12	132054	15	484438	0.00621967	0.401561	PAN3	DOX17againstowncontroln2	1	9	2	8	0.6
DOX17againstowncontroln2	SCAND2	36	132054	77	484438	0.00639864	0.406604	SCAND2	DOX17againstowncontroln2	10	14	12	13	0.734694
DOX17againstowncontroln2	PBX4	5	132054	2	484438	0.00639986	0.406604	PBX4	DOX17againstowncontroln2	0	5	0	2	0.714286
DOX17againstowncontroln2	TSLP	5	132054	2	484438	0.00639986	0.406604	TSLP	DOX17againstowncontroln2	0	5	0	0	1
DOX17againstowncontroln2	LOC645323	86	132054	227	484438	0.00658536	0.406604	LOC645323	DOX17againstowncontroln2	7	74	5	55	0.609929
DOX17againstowncontroln2	DKFZp761E198	8	132054	7	484438	0.00660349	0.406604	DKFZp761E198	DOX17againstowncontroln2	3	0	5	0	1
DOX17againstowncontroln2	LPCAT1	8	132054	7	484438	0.00660349	0.406604	LPCAT1	DOX17againstowncontroln2	0	8	0	1	0.888889
DOX17againstowncontroln2	RPLP2	8	132054	7	484438	0.00660349	0.406604	RPLP2	DOX17againstowncontroln2	0	7	1	15	0.347826
DOX17againstowncontroln2	TAF4	8	132054	7	484438	0.00660349	0.406604	TAF4	DOX17againstowncontroln2	1	7	0	2	0.8
DOX17againstowncontroln2	TAZ	8	132054	7	484438	0.00660349	0.406604	TAZ	DOX17againstowncontroln2	2	2	4	0	1
DOX17againstowncontroln2	TIMM8A	8	132054	7	484438	0.00660349	0.406604	TIMM8A	DOX17againstowncontroln2	2	4	2	1	0.888889
DOX17againstowncontroln2	C17orf44	15	132054	22	484438	0.0066366	0.406759	C17orf44	DOX17againstowncontroln2	5	3	7	6	0.714286
DOX17againstowncontroln2	MYO19	29	132054	58	484438	0.00680366	0.409745	MYO19	DOX17againstowncontroln2	10	17	2	11	0.725
DOX17againstowncontroln2	AMD1	10	132054	11	484438	0.00682245	0.409745	AMD1	DOX17againstowncontroln2	4	4	2	3	0.769231
DOX17againstowncontroln2	HSD17B8	10	132054	11	484438	0.00682245	0.409745	HSD17B8	DOX17againstowncontroln2	3	5	2	3	0.769231
DOX17againstowncontroln2	UBE2Q1	10	132054	11	484438	0.00682245	0.409745	UBE2Q1	DOX17againstowncontroln2	3	7	0	1	0.909091
DOX17againstowncontroln2	C4orf10	9	132054	9	484438	0.00687016	0.409745	C4orf10	DOX17againstowncontroln2	3	0	6	0	1
DOX17againstowncontroln2	HOXC10	9	132054	9	484438	0.00687016	0.409745	HOXC10	DOX17againstowncontroln2	5	0	4	1	0.9
DOX17againstowncontroln2	DNASE1L1	21	132054	37	484438	0.0070359	0.41406	DNASE1L1	DOX17againstowncontroln2	1	17	3	7	0.75
DOX17againstowncontroln2	FSTL3	21	132054	37	484438	0.0070359	0.41406	FSTL3	DOX17againstowncontroln2	9	3	9	7	0.75
DOX17againstowncontroln2	TMEFF2	21	132054	37	484438	0.0070359	0.41406	TMEFF2	DOX17againstowncontroln2	1	20	0	19	0.525
DOX17againstowncontroln2	CSNK1A1	19	132054	32	484438	0.00714434	0.418589	CSNK1A1	DOX17againstowncontroln2	2	15	2	6	0.76
DOX17againstowncontroln2	DDX6	22	132054	40	484438	0.00771012	0.449757	DDX6	DOX17againstowncontroln2	1	21	0	8	0.733333
DOX17againstowncontroln2	MAGIX	38	132054	84	484438	0.0078118	0.453698	MAGIX	DOX17againstowncontroln2	17	3	18	6	0.863636
DOX17againstowncontroln2	HOXC8	20	132054	35	484438	0.00797288	0.461041	HOXC8	DOX17againstowncontroln2	12	6	2	8	0.714286
DOX17againstowncontroln2	PCOLCE	13	132054	18	484438	0.00805546	0.4618	PCOLCE	DOX17againstowncontroln2	3	9	1	5	0.722222
DOX17againstowncontroln2	ZNF80	13	132054	18	484438	0.00805546	0.4618	ZNF80	DOX17againstowncontroln2	7	0	6	0	1
DOX17againstowncontroln2	RPL27A	40	132054	90	484438	0.00810727	0.462776	RPL27A	DOX17againstowncontroln2	17	3	20	4	0.909091
DOX17againstowncontroln2	FAM198B	70	132054	180	484438	0.00833083	0.473504	FAM198B	DOX17againstowncontroln2	13	44	13	38	0.648148
DOX17againstowncontroln2	CCDC113	4	132054	1	484438	0.00872277	0.481122	CCDC113	DOX17againstowncontroln2	0	4	0	0	1
DOX17againstowncontroln2	INSM1	4	132054	1	484438	0.00872277	0.481122	INSM1	DOX17againstowncontroln2	2	0	2	0	1
DOX17againstowncontroln2	NCRNA00262	4	132054	1	484438	0.00872277	0.481122	NCRNA00262	DOX17againstowncontroln2	0	0	4	0	1
DOX17againstowncontroln2	PSMC4	4	132054	1	484438	0.00872277	0.481122	PSMC4	DOX17againstowncontroln2	0	4	0	2	0.666667
DOX17againstowncontroln2	R3HCC1	4	132054	1	484438	0.00872277	0.481122	R3HCC1	DOX17againstowncontroln2	0	4	0	0	1
DOX17againstowncontroln2	TP63	4	132054	1	484438	0.00872277	0.481122	TP63	DOX17againstowncontroln2	0	4	0	1	0.8
DOX17againstowncontroln2	TUBB2B	4	132054	1	484438	0.00872277	0.481122	TUBB2B	DOX17againstowncontroln2	1	1	2	1	0.8
DOX17againstowncontroln2	SHE	12	132054	16	484438	0.00879094	0.481122	SHE	DOX17againstowncontroln2	8	0	4	0	1
DOX17againstowncontroln2	AGL	15	132054	23	484438	0.00882659	0.481122	AGL	DOX17againstowncontroln2	4	7	4	2	0.882353
DOX17againstowncontroln2	SOX12	15	132054	23	484438	0.00882659	0.481122	SOX12	DOX17againstowncontroln2	9	0	6	0	1
DOX17againstowncontroln2	BAZ2B	55	132054	135	484438	0.00891185	0.483786	BAZ2B	DOX17againstowncontroln2	6	44	5	38	0.591398
DOX17againstowncontroln2	EIF4E1B	6	132054	4	484438	0.00907039	0.485965	EIF4E1B	DOX17againstowncontroln2	3	2	1	0	1
DOX17againstowncontroln2	EPM2AIP1	6	132054	4	484438	0.00907039	0.485965	EPM2AIP1	DOX17againstowncontroln2	4	0	2	0	1
DOX17againstowncontroln2	MAP2K7	6	132054	4	484438	0.00907039	0.485965	MAP2K7	DOX17againstowncontroln2	0	5	1	0	1
DOX17againstowncontroln2	NRARP	17	132054	28	484438	0.00909814	0.485965	NRARP	DOX17againstowncontroln2	7	0	10	0	1
DOX17againstowncontroln2	CTPS2	33	132054	71	484438	0.00933584	0.493014	CTPS2	DOX17againstowncontroln2	10	9	14	4	0.891892
DOX17againstowncontroln2	LOC150197	11	132054	14	484438	0.009503	0.493014	LOC150197	DOX17againstowncontroln2	4	0	7	0	1
DOX17againstowncontroln2	PAFAH1B2	11	132054	14	484438	0.009503	0.493014	PAFAH1B2	DOX17againstowncontroln2	0	10	1	6	0.647059
DOX17againstowncontroln2	ARPM1	3	132054	0	484438	0.00982851	0.493014	ARPM1	DOX17againstowncontroln2	1	0	2	0	1
DOX17againstowncontroln2	C6orf138	3	132054	0	484438	0.00982851	0.493014	C6orf138	DOX17againstowncontroln2	0	3	0	1	0.75
DOX17againstowncontroln2	CD83	3	132054	0	484438	0.00982851	0.493014	CD83	DOX17againstowncontroln2	0	3	0	1	0.75
DOX17againstowncontroln2	HRAS	3	132054	0	484438	0.00982851	0.493014	HRAS	DOX17againstowncontroln2	1	2	0	1	0.75
DOX17againstowncontroln2	METRN	3	132054	0	484438	0.00982851	0.493014	METRN	DOX17againstowncontroln2	0	3	0	2	0.6
DOX17againstowncontroln2	NCF1C	3	132054	0	484438	0.00982851	0.493014	NCF1C	DOX17againstowncontroln2	0	3	0	0	1
DOX17againstowncontroln2	SEC16B	3	132054	0	484438	0.00982851	0.493014	SEC16B	DOX17againstowncontroln2	0	3	0	0	1
DOX17againstowncontroln2	SUSD4	3	132054	0	484438	0.00982851	0.493014	SUSD4	DOX17againstowncontroln2	0	3	0	0	1
DOX17againstowncontroln2	TMEM70	3	132054	0	484438	0.00982851	0.493014	TMEM70	DOX17againstowncontroln2	0	2	1	2	0.6
DOX17againstowncontroln2	WBSCR17	3	132054	0	484438	0.00982851	0.493014	WBSCR17	DOX17againstowncontroln2	0	3	0	0	1
DOX17againstowncontroln2	ZFC3H1	3	132054	0	484438	0.00982851	0.493014	ZFC3H1	DOX17againstowncontroln2	0	3	0	0	1
DOX17againstowncontroln2	HNRPDL	14	132054	21	484438	0.00984653	0.493014	HNRPDL	DOX17againstowncontroln2	9	0	5	2	0.875
DOX17againstowncontroln2	PDK3	36	132054	80	484438	0.0100112	0.493014	PDK3	DOX17againstowncontroln2	6	18	12	12	0.75
DOX17againstowncontroln2	ARHGEF17	10	132054	12	484438	0.0101359	0.493014	ARHGEF17	DOX17againstowncontroln2	2	5	3	3	0.769231
DOX17againstowncontroln2	CHADL	10	132054	12	484438	0.0101359	0.493014	CHADL	DOX17againstowncontroln2	4	1	5	2	0.833333
DOX17againstowncontroln2	FCRLB	10	132054	12	484438	0.0101359	0.493014	FCRLB	DOX17againstowncontroln2	4	2	4	1	0.909091
DOX17againstowncontroln2	LOC100128822	10	132054	12	484438	0.0101359	0.493014	LOC100128822	DOX17againstowncontroln2	5	0	5	0	1
DOX17againstowncontroln2	UCKL1AS	10	132054	12	484438	0.0101359	0.493014	UCKL1AS	DOX17againstowncontroln2	4	0	6	0	1
DOX17againstowncontroln2	CTAGE5	23	132054	44	484438	0.0101798	0.493014	CTAGE5	DOX17againstowncontroln2	5	13	5	9	0.71875
DOX17againstowncontroln2	IFT88	23	132054	44	484438	0.0101798	0.493014	IFT88	DOX17againstowncontroln2	2	19	2	8	0.741935
DOX17againstowncontroln2	MDP1	16	132054	26	484438	0.0102567	0.493014	MDP1	DOX17againstowncontroln2	7	6	3	3	0.842105
DOX17againstowncontroln2	NEAT1	16	132054	26	484438	0.0102567	0.493014	NEAT1	DOX17againstowncontroln2	6	0	10	0	1
DOX17againstowncontroln2	PIGN	16	132054	26	484438	0.0102567	0.493014	PIGN	DOX17againstowncontroln2	0	15	1	8	0.666667
DOX17againstowncontroln2	COQ6	7	132054	6	484438	0.0103582	0.493014	COQ6	DOX17againstowncontroln2	1	5	1	1	0.875
DOX17againstowncontroln2	MTMR11	7	132054	6	484438	0.0103582	0.493014	MTMR11	DOX17againstowncontroln2	2	2	3	0	1
DOX17againstowncontroln2	MYO16	7	132054	6	484438	0.0103582	0.493014	MYO16	DOX17againstowncontroln2	0	7	0	1	0.875
DOX17againstowncontroln2	AAA1	38	132054	86	484438	0.0103593	0.493014	AAA1	DOX17againstowncontroln2	0	38	0	23	0.622951
DOX17againstowncontroln2	BAG1	9	132054	10	484438	0.0105995	0.493014	BAG1	DOX17againstowncontroln2	0	8	1	2	0.818182
DOX17againstowncontroln2	CHD8	9	132054	10	484438	0.0105995	0.493014	CHD8	DOX17againstowncontroln2	1	8	0	4	0.692308
DOX17againstowncontroln2	FUT4	9	132054	10	484438	0.0105995	0.493014	FUT4	DOX17againstowncontroln2	6	0	3	0	1
DOX17againstowncontroln2	ZNF280B	9	132054	10	484438	0.0105995	0.493014	ZNF280B	DOX17againstowncontroln2	2	5	2	1	0.9
DOX17againstowncontroln2	C2orf16	8	132054	8	484438	0.0107499	0.493014	C2orf16	DOX17againstowncontroln2	5	0	3	0	1
DOX17againstowncontroln2	LIMK1	8	132054	8	484438	0.0107499	0.493014	LIMK1	DOX17againstowncontroln2	1	6	1	1	0.888889
DOX17againstowncontroln2	PAG1	8	132054	8	484438	0.0107499	0.493014	PAG1	DOX17againstowncontroln2	0	8	0	5	0.615385
DOX17againstowncontroln2	PAQR4	8	132054	8	484438	0.0107499	0.493014	PAQR4	DOX17againstowncontroln2	5	0	3	3	0.727273
DOX17againstowncontroln2	SAR1A	8	132054	8	484438	0.0107499	0.493014	SAR1A	DOX17againstowncontroln2	0	8	0	1	0.888889
DOX17againstowncontroln2	TULP4	8	132054	8	484438	0.0107499	0.493014	TULP4	DOX17againstowncontroln2	0	8	0	1	0.888889
DOX17againstowncontroln2	ZNF594	8	132054	8	484438	0.0107499	0.493014	ZNF594	DOX17againstowncontroln2	2	6	0	3	0.727273
DOX17againstowncontroln2	NFKB1	21	132054	39	484438	0.0108028	0.493735	NFKB1	DOX17againstowncontroln2	0	21	0	4	0.84
DOX17againstowncontroln2	CLEC16A	28	132054	58	484438	0.0109301	0.49527	CLEC16A	DOX17againstowncontroln2	2	23	3	17	0.622222
DOX17againstowncontroln2	HOXB2	28	132054	58	484438	0.0109301	0.49527	HOXB2	DOX17againstowncontroln2	14	7	7	8	0.777778
DOX17againstowncontroln2	ZNF664	13	132054	19	484438	0.0109481	0.49527	ZNF664	DOX17againstowncontroln2	2	10	1	4	0.764706
DOX17againstowncontroln2	MLLT11	52	132054	128	484438	0.0111683	0.50352	MLLT11	DOX17againstowncontroln2	6	36	10	29	0.641975
DOX17againstowncontroln2	GSTZ1	15	132054	24	484438	0.0115513	0.519028	GSTZ1	DOX17againstowncontroln2	1	13	1	4	0.789474
DOX17againstowncontroln2	NFYB	17	132054	29	484438	0.011603	0.519595	NFYB	DOX17againstowncontroln2	0	17	0	9	0.653846
DOX17againstowncontroln2	GTF2I	40	132054	93	484438	0.0121239	0.541101	GTF2I	DOX17againstowncontroln2	3	31	6	22	0.645161
DOX17againstowncontroln2	PLEKHA4	18	132054	32	484438	0.0128559	0.567599	PLEKHA4	DOX17againstowncontroln2	3	12	3	11	0.62069
DOX17againstowncontroln2	RPH3AL	18	132054	32	484438	0.0128559	0.567599	RPH3AL	DOX17againstowncontroln2	1	17	0	10	0.642857
DOX17againstowncontroln2	TNRC6A	18	132054	32	484438	0.0128559	0.567599	TNRC6A	DOX17againstowncontroln2	2	16	0	9	0.666667
DOX17againstowncontroln2	PRRT2	28	132054	59	484438	0.0128883	0.567599	PRRT2	DOX17againstowncontroln2	12	3	13	3	0.903226
DOX17againstowncontroln2	ADAMTSL5	14	132054	22	484438	0.0129917	0.570263	ADAMTSL5	DOX17againstowncontroln2	4	7	3	5	0.736842
DOX17againstowncontroln2	SCYL2	16	132054	27	484438	0.0131465	0.574341	SCYL2	DOX17againstowncontroln2	0	16	0	17	0.484848
DOX17againstowncontroln2	RAB33A	21	132054	40	484438	0.0132142	0.574341	RAB33A	DOX17againstowncontroln2	6	11	4	4	0.84
DOX17againstowncontroln2	TRAP1	21	132054	40	484438	0.0132142	0.574341	TRAP1	DOX17againstowncontroln2	0	20	1	9	0.7
DOX17againstowncontroln2	NCRNA00095	11	132054	15	484438	0.0133328	0.575734	NCRNA00095	DOX17againstowncontroln2	5	0	6	0	1
DOX17againstowncontroln2	PSMD12	11	132054	15	484438	0.0133328	0.575734	PSMD12	DOX17againstowncontroln2	1	10	0	5	0.6875
DOX17againstowncontroln2	NR6A1	106	132054	300	484438	0.0139197	0.580674	NR6A1	DOX17againstowncontroln2	0	106	0	86	0.552083
DOX17againstowncontroln2	OAS2	42	132054	100	484438	0.013931	0.580674	OAS2	DOX17againstowncontroln2	1	36	5	26	0.617647
DOX17againstowncontroln2	LDB2	161	132054	480	484438	0.0139605	0.580674	LDB2	DOX17againstowncontroln2	1	159	1	134	0.545763
DOX17againstowncontroln2	FAM120C	22	132054	43	484438	0.0140524	0.580674	FAM120C	DOX17againstowncontroln2	6	14	2	4	0.846154
DOX17againstowncontroln2	ABHD12B	5	132054	3	484438	0.0140584	0.580674	ABHD12B	DOX17againstowncontroln2	0	5	0	0	1
DOX17againstowncontroln2	BAALC	5	132054	3	484438	0.0140584	0.580674	BAALC	DOX17againstowncontroln2	2	0	3	2	0.714286
DOX17againstowncontroln2	C10orf111	5	132054	3	484438	0.0140584	0.580674	C10orf111	DOX17againstowncontroln2	1	1	3	0	1
DOX17againstowncontroln2	DPM3	5	132054	3	484438	0.0140584	0.580674	DPM3	DOX17againstowncontroln2	1	1	3	0	1
DOX17againstowncontroln2	KAT5	5	132054	3	484438	0.0140584	0.580674	KAT5	DOX17againstowncontroln2	2	0	3	2	0.714286
DOX17againstowncontroln2	KLKB1	5	132054	3	484438	0.0140584	0.580674	KLKB1	DOX17againstowncontroln2	0	5	0	3	0.625
DOX17againstowncontroln2	LRRCC1	5	132054	3	484438	0.0140584	0.580674	LRRCC1	DOX17againstowncontroln2	1	4	0	1	0.833333
DOX17againstowncontroln2	NKX6-1	5	132054	3	484438	0.0140584	0.580674	NKX6-1	DOX17againstowncontroln2	1	3	1	1	0.833333
DOX17againstowncontroln2	SHH	5	132054	3	484438	0.0140584	0.580674	SHH	DOX17againstowncontroln2	0	5	0	1	0.833333
DOX17againstowncontroln2	SNORA16A	5	132054	3	484438	0.0140584	0.580674	SNORA16A	DOX17againstowncontroln2	3	0	2	0	1
DOX17againstowncontroln2	MTUS2	10	132054	13	484438	0.014542	0.592864	MTUS2	DOX17againstowncontroln2	1	9	0	5	0.666667
DOX17againstowncontroln2	SNHG10	10	132054	13	484438	0.014542	0.592864	SNHG10	DOX17againstowncontroln2	2	0	8	0	1
DOX17againstowncontroln2	LOC100271722	33	132054	74	484438	0.0145502	0.592864	LOC100271722	DOX17againstowncontroln2	3	24	6	19	0.634615
DOX17againstowncontroln2	ITM2B	13	132054	20	484438	0.0145848	0.592864	ITM2B	DOX17againstowncontroln2	0	12	1	11	0.541667
DOX17againstowncontroln2	PJA2	13	132054	20	484438	0.0145848	0.592864	PJA2	DOX17againstowncontroln2	1	12	0	0	1
DOX17againstowncontroln2	PNMA1	17	132054	30	484438	0.014621	0.592864	PNMA1	DOX17againstowncontroln2	3	0	14	0	1
DOX17againstowncontroln2	PDZRN4	27	132054	57	484438	0.0146664	0.592896	PDZRN4	DOX17againstowncontroln2	0	27	0	25	0.519231
DOX17againstowncontroln2	CNOT2	15	132054	25	484438	0.0148913	0.600165	CNOT2	DOX17againstowncontroln2	0	15	0	7	0.681818
DOX17againstowncontroln2	LONRF2	24	132054	49	484438	0.01551	0.60035	LONRF2	DOX17againstowncontroln2	8	5	11	0	1
DOX17againstowncontroln2	MAP7D2	39	132054	92	484438	0.0155315	0.60035	MAP7D2	DOX17againstowncontroln2	14	2	23	4	0.906977
DOX17againstowncontroln2	C6orf142	9	132054	11	484438	0.0156613	0.60035	C6orf142	DOX17againstowncontroln2	0	9	0	4	0.692308
DOX17againstowncontroln2	S100A4	9	132054	11	484438	0.0156613	0.60035	S100A4	DOX17againstowncontroln2	3	4	2	3	0.75
DOX17againstowncontroln2	SEPT7	9	132054	11	484438	0.0156613	0.60035	SEPT7	DOX17againstowncontroln2	0	9	0	4	0.692308
DOX17againstowncontroln2	FAM60A	30	132054	66	484438	0.0158876	0.60035	FAM60A	DOX17againstowncontroln2	0	30	0	9	0.769231
DOX17againstowncontroln2	TAPBP	18	132054	33	484438	0.0159713	0.60035	TAPBP	DOX17againstowncontroln2	7	6	5	2	0.9
DOX17againstowncontroln2	USO1	18	132054	33	484438	0.0159713	0.60035	USO1	DOX17againstowncontroln2	0	17	1	11	0.62069
DOX17againstowncontroln2	SH3GL3	97	132054	273	484438	0.0160274	0.60035	SH3GL3	DOX17againstowncontroln2	0	97	0	91	0.515957
DOX17againstowncontroln2	C9orf130	12	132054	18	484438	0.0163318	0.60035	C9orf130	DOX17againstowncontroln2	6	2	4	3	0.8
DOX17againstowncontroln2	DLAT	12	132054	18	484438	0.0163318	0.60035	DLAT	DOX17againstowncontroln2	3	7	2	5	0.705882
DOX17againstowncontroln2	FAM117B	12	132054	18	484438	0.0163318	0.60035	FAM117B	DOX17againstowncontroln2	1	11	0	9	0.571429
DOX17againstowncontroln2	LOC401431	12	132054	18	484438	0.0163318	0.60035	LOC401431	DOX17againstowncontroln2	3	7	2	5	0.705882
DOX17againstowncontroln2	TCEAL1	12	132054	18	484438	0.0163318	0.60035	TCEAL1	DOX17againstowncontroln2	3	6	3	3	0.8
DOX17againstowncontroln2	CBLL1	6	132054	5	484438	0.0163638	0.60035	CBLL1	DOX17againstowncontroln2	1	5	0	0	1
DOX17againstowncontroln2	FN3KRP	6	132054	5	484438	0.0163638	0.60035	FN3KRP	DOX17againstowncontroln2	0	6	0	0	1
DOX17againstowncontroln2	MAP3K11	6	132054	5	484438	0.0163638	0.60035	MAP3K11	DOX17againstowncontroln2	1	1	4	1	0.857143
DOX17againstowncontroln2	SH2D5	6	132054	5	484438	0.0163638	0.60035	SH2D5	DOX17againstowncontroln2	1	5	0	1	0.857143
DOX17againstowncontroln2	SH3RF3	6	132054	5	484438	0.0163638	0.60035	SH3RF3	DOX17againstowncontroln2	0	6	0	4	0.6
DOX17againstowncontroln2	TPPP3	6	132054	5	484438	0.0163638	0.60035	TPPP3	DOX17againstowncontroln2	0	5	1	1	0.857143
DOX17againstowncontroln2	TRIM28	6	132054	5	484438	0.0163638	0.60035	TRIM28	DOX17againstowncontroln2	0	3	3	1	0.857143
DOX17againstowncontroln2	TRRAP	6	132054	5	484438	0.0163638	0.60035	TRRAP	DOX17againstowncontroln2	0	6	0	3	0.666667
DOX17againstowncontroln2	LOH12CR1	32	132054	72	484438	0.01649	0.60035	LOH12CR1	DOX17againstowncontroln2	1	30	1	24	0.571429
DOX17againstowncontroln2	NBR1	32	132054	72	484438	0.01649	0.60035	NBR1	DOX17againstowncontroln2	13	5	14	4	0.888889
DOX17againstowncontroln2	ALKBH6	8	132054	9	484438	0.0165423	0.60035	ALKBH6	DOX17againstowncontroln2	1	7	0	1	0.888889
DOX17againstowncontroln2	AMZ2P1	8	132054	9	484438	0.0165423	0.60035	AMZ2P1	DOX17againstowncontroln2	6	0	2	0	1
DOX17againstowncontroln2	B4GALT7	8	132054	9	484438	0.0165423	0.60035	B4GALT7	DOX17againstowncontroln2	0	8	0	3	0.727273
DOX17againstowncontroln2	EPHB1	8	132054	9	484438	0.0165423	0.60035	EPHB1	DOX17againstowncontroln2	0	8	0	3	0.727273
DOX17againstowncontroln2	LOC100302650	8	132054	9	484438	0.0165423	0.60035	LOC100302650	DOX17againstowncontroln2	5	0	3	0	1
DOX17againstowncontroln2	RBM15	8	132054	9	484438	0.0165423	0.60035	RBM15	DOX17againstowncontroln2	6	0	2	0	1
DOX17againstowncontroln2	SLC16A14	8	132054	9	484438	0.0165423	0.60035	SLC16A14	DOX17againstowncontroln2	0	7	1	3	0.727273
DOX17againstowncontroln2	TAF5L	8	132054	9	484438	0.0165423	0.60035	TAF5L	DOX17againstowncontroln2	0	8	0	3	0.727273
DOX17againstowncontroln2	VCAN	8	132054	9	484438	0.0165423	0.60035	VCAN	DOX17againstowncontroln2	2	6	0	5	0.615385
DOX17againstowncontroln2	SNHG1	16	132054	28	484438	0.0166338	0.60035	SNHG1	DOX17againstowncontroln2	3	11	2	4	0.8
DOX17againstowncontroln2	COLEC11	14	132054	23	484438	0.01686	0.60035	COLEC11	DOX17againstowncontroln2	1	13	0	7	0.666667
DOX17againstowncontroln2	RABIF	14	132054	23	484438	0.01686	0.60035	RABIF	DOX17againstowncontroln2	0	14	0	5	0.736842
DOX17againstowncontroln2	BLOC1S2	7	132054	7	484438	0.0169272	0.60035	BLOC1S2	DOX17againstowncontroln2	2	5	0	0	1
DOX17againstowncontroln2	FAM119A	7	132054	7	484438	0.0169272	0.60035	FAM119A	DOX17againstowncontroln2	1	6	0	2	0.777778
DOX17againstowncontroln2	HMGB2	7	132054	7	484438	0.0169272	0.60035	HMGB2	DOX17againstowncontroln2	3	3	1	1	0.875
DOX17againstowncontroln2	MESDC1	7	132054	7	484438	0.0169272	0.60035	MESDC1	DOX17againstowncontroln2	3	0	4	0	1
DOX17againstowncontroln2	OGG1	7	132054	7	484438	0.0169272	0.60035	OGG1	DOX17againstowncontroln2	1	4	2	2	0.777778
DOX17againstowncontroln2	PCGF1	7	132054	7	484438	0.0169272	0.60035	PCGF1	DOX17againstowncontroln2	1	4	2	2	0.777778
DOX17againstowncontroln2	RIOK1	7	132054	7	484438	0.0169272	0.60035	RIOK1	DOX17againstowncontroln2	0	7	0	3	0.7
DOX17againstowncontroln2	TTC4	7	132054	7	484438	0.0169272	0.60035	TTC4	DOX17againstowncontroln2	0	7	0	1	0.875
DOX17againstowncontroln2	ZNF593	7	132054	7	484438	0.0169272	0.60035	ZNF593	DOX17againstowncontroln2	2	4	1	2	0.777778
DOX17againstowncontroln2	TNFRSF11A	63	132054	166	484438	0.0171626	0.607083	TNFRSF11A	DOX17againstowncontroln2	4	47	12	34	0.649485
DOX17againstowncontroln2	LOC338799	113	132054	326	484438	0.0173838	0.613275	LOC338799	DOX17againstowncontroln2	17	77	19	63	0.642045
DOX17againstowncontroln2	ACN9	28	132054	61	484438	0.0176489	0.620824	ACN9	DOX17againstowncontroln2	6	13	9	7	0.8
DOX17againstowncontroln2	C11orf20	23	132054	47	484438	0.0176912	0.620824	C11orf20	DOX17againstowncontroln2	12	5	6	3	0.884615
DOX17againstowncontroln2	EFR3A	17	132054	31	484438	0.0182165	0.631163	EFR3A	DOX17againstowncontroln2	0	16	1	4	0.809524
DOX17againstowncontroln2	C6orf47	11	132054	16	484438	0.018223	0.631163	C6orf47	DOX17againstowncontroln2	6	0	5	0	1
DOX17againstowncontroln2	CAND1	11	132054	16	484438	0.018223	0.631163	CAND1	DOX17againstowncontroln2	2	7	2	2	0.846154
DOX17againstowncontroln2	HSD17B1	11	132054	16	484438	0.018223	0.631163	HSD17B1	DOX17againstowncontroln2	6	3	2	3	0.785714
DOX17againstowncontroln2	LSM10	11	132054	16	484438	0.018223	0.631163	LSM10	DOX17againstowncontroln2	0	11	0	6	0.647059
DOX17againstowncontroln2	EIF4E	20	132054	39	484438	0.0183074	0.632436	EIF4E	DOX17againstowncontroln2	3	13	4	2	0.909091
DOX17againstowncontroln2	ARL8B	15	132054	26	484438	0.018929	0.646387	ARL8B	DOX17againstowncontroln2	0	15	0	7	0.681818
DOX17againstowncontroln2	C3orf58	15	132054	26	484438	0.018929	0.646387	C3orf58	DOX17againstowncontroln2	3	9	3	7	0.681818
DOX17againstowncontroln2	KIAA1949	15	132054	26	484438	0.018929	0.646387	KIAA1949	DOX17againstowncontroln2	6	2	7	1	0.9375
DOX17againstowncontroln2	MDM2	15	132054	26	484438	0.018929	0.646387	MDM2	DOX17againstowncontroln2	3	9	3	5	0.75
DOX17againstowncontroln2	ANP32E	32	132054	73	484438	0.0189542	0.646387	ANP32E	DOX17againstowncontroln2	7	17	8	20	0.615385
DOX17againstowncontroln2	IGFBP6	13	132054	21	484438	0.0190755	0.647204	IGFBP6	DOX17againstowncontroln2	1	10	2	8	0.619048
DOX17againstowncontroln2	LYSMD1	13	132054	21	484438	0.0190755	0.647204	LYSMD1	DOX17againstowncontroln2	2	6	5	4	0.764706
DOX17againstowncontroln2	MC1R	21	132054	42	484438	0.0193034	0.651613	MC1R	DOX17againstowncontroln2	10	0	11	0	1
DOX17againstowncontroln2	SGK269	21	132054	42	484438	0.0193034	0.651613	SGK269	DOX17againstowncontroln2	1	20	0	14	0.6
DOX17againstowncontroln2	C8orf51	18	132054	34	484438	0.0196433	0.659737	C8orf51	DOX17againstowncontroln2	10	0	8	0	1
DOX17againstowncontroln2	HIST2H2BE	18	132054	34	484438	0.0196433	0.659737	HIST2H2BE	DOX17againstowncontroln2	7	0	11	0	1
DOX17againstowncontroln2	NELL2	39	132054	94	484438	0.0198505	0.663346	NELL2	DOX17againstowncontroln2	0	38	1	31	0.557143
DOX17againstowncontroln2	SUGT1P1	39	132054	94	484438	0.0198505	0.663346	SUGT1P1	DOX17againstowncontroln2	1	38	0	43	0.47561
DOX17againstowncontroln2	ZNF436	22	132054	45	484438	0.0201936	0.665257	ZNF436	DOX17againstowncontroln2	7	7	8	9	0.709677
DOX17againstowncontroln2	ALOXE3	10	132054	14	484438	0.0202301	0.665257	ALOXE3	DOX17againstowncontroln2	2	7	1	4	0.714286
DOX17againstowncontroln2	DDX58	10	132054	14	484438	0.0202301	0.665257	DDX58	DOX17againstowncontroln2	2	6	2	4	0.714286
DOX17againstowncontroln2	PAPOLA	10	132054	14	484438	0.0202301	0.665257	PAPOLA	DOX17againstowncontroln2	0	9	1	7	0.588235
DOX17againstowncontroln2	PIGO	10	132054	14	484438	0.0202301	0.665257	PIGO	DOX17againstowncontroln2	2	5	3	2	0.833333
DOX17againstowncontroln2	SMS	10	132054	14	484438	0.0202301	0.665257	SMS	DOX17againstowncontroln2	0	10	0	1	0.909091
DOX17againstowncontroln2	ACO2	16	132054	29	484438	0.0207913	0.665257	ACO2	DOX17againstowncontroln2	0	16	0	5	0.761905
DOX17againstowncontroln2	DUSP28	16	132054	29	484438	0.0207913	0.665257	DUSP28	DOX17againstowncontroln2	8	3	5	7	0.695652
DOX17againstowncontroln2	PET117	16	132054	29	484438	0.0207913	0.665257	PET117	DOX17againstowncontroln2	0	16	0	9	0.64
DOX17againstowncontroln2	RWDD2B	16	132054	29	484438	0.0207913	0.665257	RWDD2B	DOX17againstowncontroln2	1	15	0	9	0.64
DOX17againstowncontroln2	BCL2	19	132054	37	484438	0.0209213	0.665257	BCL2	DOX17againstowncontroln2	4	9	6	6	0.76
DOX17againstowncontroln2	MRPL34	23	132054	48	484438	0.0209851	0.665257	MRPL34	DOX17againstowncontroln2	12	1	10	1	0.958333
DOX17againstowncontroln2	TRIM65	23	132054	48	484438	0.0209851	0.665257	TRIM65	DOX17againstowncontroln2	1	18	4	14	0.621622
DOX17againstowncontroln2	YWHAZ	23	132054	48	484438	0.0209851	0.665257	YWHAZ	DOX17againstowncontroln2	6	16	1	12	0.657143
DOX17againstowncontroln2	RBL1	49	132054	125	484438	0.0214545	0.665257	RBL1	DOX17againstowncontroln2	2	47	0	35	0.583333
DOX17againstowncontroln2	CDC25B	14	132054	24	484438	0.0215462	0.665257	CDC25B	DOX17againstowncontroln2	4	4	6	2	0.875
DOX17againstowncontroln2	C15orf37	12	132054	19	484438	0.0215589	0.665257	C15orf37	DOX17againstowncontroln2	6	0	6	0	1
DOX17againstowncontroln2	DDHD1	12	132054	19	484438	0.0215589	0.665257	DDHD1	DOX17againstowncontroln2	2	8	2	5	0.705882
DOX17againstowncontroln2	EID2B	12	132054	19	484438	0.0215589	0.665257	EID2B	DOX17againstowncontroln2	8	0	4	0	1
DOX17againstowncontroln2	NAA35	12	132054	19	484438	0.0215589	0.665257	NAA35	DOX17againstowncontroln2	0	9	3	3	0.8
DOX17againstowncontroln2	RPS10	12	132054	19	484438	0.0215589	0.665257	RPS10	DOX17againstowncontroln2	0	12	0	12	0.5
DOX17againstowncontroln2	CNOT4	24	132054	51	484438	0.0216851	0.665257	CNOT4	DOX17againstowncontroln2	0	23	1	8	0.75
DOX17againstowncontroln2	C1orf122	4	132054	2	484438	0.0217226	0.665257	C1orf122	DOX17againstowncontroln2	2	2	0	0	1
DOX17againstowncontroln2	C1orf128	4	132054	2	484438	0.0217226	0.665257	C1orf128	DOX17againstowncontroln2	0	3	1	1	0.8
DOX17againstowncontroln2	C6orf64	4	132054	2	484438	0.0217226	0.665257	C6orf64	DOX17againstowncontroln2	0	4	0	2	0.666667
DOX17againstowncontroln2	COX5B	4	132054	2	484438	0.0217226	0.665257	COX5B	DOX17againstowncontroln2	0	3	1	2	0.666667
DOX17againstowncontroln2	CTGF	4	132054	2	484438	0.0217226	0.665257	CTGF	DOX17againstowncontroln2	3	1	0	0	1
DOX17againstowncontroln2	DMRT1	4	132054	2	484438	0.0217226	0.665257	DMRT1	DOX17againstowncontroln2	1	2	1	3	0.571429
DOX17againstowncontroln2	LMBR1L	4	132054	2	484438	0.0217226	0.665257	LMBR1L	DOX17againstowncontroln2	2	1	1	2	0.666667
DOX17againstowncontroln2	LOC100272228	4	132054	2	484438	0.0217226	0.665257	LOC100272228	DOX17againstowncontroln2	0	4	0	3	0.571429
DOX17againstowncontroln2	MSH6	4	132054	2	484438	0.0217226	0.665257	MSH6	DOX17againstowncontroln2	0	3	1	3	0.571429
DOX17againstowncontroln2	PSMB8	4	132054	2	484438	0.0217226	0.665257	PSMB8	DOX17againstowncontroln2	0	2	2	0	1
DOX17againstowncontroln2	PSORS1C2	4	132054	2	484438	0.0217226	0.665257	PSORS1C2	DOX17againstowncontroln2	3	0	1	0	1
DOX17againstowncontroln2	SIN3B	4	132054	2	484438	0.0217226	0.665257	SIN3B	DOX17againstowncontroln2	0	3	1	2	0.666667
DOX17againstowncontroln2	SLC35B2	4	132054	2	484438	0.0217226	0.665257	SLC35B2	DOX17againstowncontroln2	1	3	0	0	1
DOX17againstowncontroln2	ZNF782	4	132054	2	484438	0.0217226	0.665257	ZNF782	DOX17againstowncontroln2	0	4	0	1	0.8
DOX17againstowncontroln2	SNHG3	58	132054	153	484438	0.0217584	0.665257	SNHG3	DOX17againstowncontroln2	16	28	14	54	0.517857
DOX17againstowncontroln2	KDM5A	20	132054	40	484438	0.0220597	0.671171	KDM5A	DOX17againstowncontroln2	1	17	2	9	0.689655
DOX17againstowncontroln2	B3GALT6	9	132054	12	484438	0.0222905	0.671171	B3GALT6	DOX17againstowncontroln2	5	0	4	0	1
DOX17againstowncontroln2	C12orf43	9	132054	12	484438	0.0222905	0.671171	C12orf43	DOX17againstowncontroln2	1	7	1	2	0.818182
DOX17againstowncontroln2	C9orf139	9	132054	12	484438	0.0222905	0.671171	C9orf139	DOX17againstowncontroln2	5	1	3	0	1
DOX17againstowncontroln2	CERK	9	132054	12	484438	0.0222905	0.671171	CERK	DOX17againstowncontroln2	1	7	1	6	0.6
DOX17againstowncontroln2	HPS4	37	132054	89	484438	0.0223051	0.671171	HPS4	DOX17againstowncontroln2	7	24	6	17	0.685185
DOX17againstowncontroln2	UBL7	37	132054	89	484438	0.0223051	0.671171	UBL7	DOX17againstowncontroln2	1	35	1	27	0.578125
DOX17againstowncontroln2	DCTPP1	17	132054	32	484438	0.0224545	0.674141	DCTPP1	DOX17againstowncontroln2	1	15	1	8	0.68
DOX17againstowncontroln2	MKX	67	132054	182	484438	0.0231711	0.69409	MKX	DOX17againstowncontroln2	22	18	27	16	0.807229
DOX17againstowncontroln2	UBE2G1	146	132054	440	484438	0.0236491	0.700299	UBE2G1	DOX17againstowncontroln2	7	137	2	103	0.586345
DOX17againstowncontroln2	HMOX2	28	132054	63	484438	0.0237045	0.700299	HMOX2	DOX17againstowncontroln2	5	18	5	11	0.717949
DOX17againstowncontroln2	CYP20A1	15	132054	27	484438	0.023747	0.700299	CYP20A1	DOX17againstowncontroln2	7	5	3	1	0.9375
DOX17againstowncontroln2	C16orf53	18	132054	35	484438	0.0239302	0.700299	C16orf53	DOX17againstowncontroln2	6	5	7	3	0.857143
DOX17againstowncontroln2	STAMBPL1	22	132054	46	484438	0.0239569	0.700299	STAMBPL1	DOX17againstowncontroln2	1	21	0	9	0.709677
DOX17againstowncontroln2	EIF4G1	8	132054	10	484438	0.0242801	0.700299	EIF4G1	DOX17againstowncontroln2	2	6	0	5	0.615385
DOX17againstowncontroln2	FAM158A	8	132054	10	484438	0.0242801	0.700299	FAM158A	DOX17againstowncontroln2	1	5	2	3	0.727273
DOX17againstowncontroln2	FSD1	8	132054	10	484438	0.0242801	0.700299	FSD1	DOX17againstowncontroln2	0	7	1	1	0.888889
DOX17againstowncontroln2	GLA	8	132054	10	484438	0.0242801	0.700299	GLA	DOX17againstowncontroln2	0	7	1	1	0.888889
DOX17againstowncontroln2	LRRC23	8	132054	10	484438	0.0242801	0.700299	LRRC23	DOX17againstowncontroln2	3	2	3	2	0.8
DOX17againstowncontroln2	LTB	8	132054	10	484438	0.0242801	0.700299	LTB	DOX17againstowncontroln2	2	5	1	0	1
DOX17againstowncontroln2	RIMKLA	8	132054	10	484438	0.0242801	0.700299	RIMKLA	DOX17againstowncontroln2	3	2	3	4	0.666667
DOX17againstowncontroln2	SOCS7	8	132054	10	484438	0.0242801	0.700299	SOCS7	DOX17againstowncontroln2	0	7	1	0	1
DOX17againstowncontroln2	TPP1	8	132054	10	484438	0.0242801	0.700299	TPP1	DOX17againstowncontroln2	3	2	3	2	0.8
DOX17againstowncontroln2	C1orf187	11	132054	17	484438	0.0243262	0.700299	C1orf187	DOX17againstowncontroln2	1	10	0	1	0.916667
DOX17againstowncontroln2	LRRTM2	11	132054	17	484438	0.0243262	0.700299	LRRTM2	DOX17againstowncontroln2	6	0	5	0	1
DOX17againstowncontroln2	SRA1	11	132054	17	484438	0.0243262	0.700299	SRA1	DOX17againstowncontroln2	4	4	3	2	0.846154
DOX17againstowncontroln2	TMEM203	11	132054	17	484438	0.0243262	0.700299	TMEM203	DOX17againstowncontroln2	8	0	3	0	1
DOX17againstowncontroln2	GPATCH8	31	132054	72	484438	0.0245645	0.704616	GPATCH8	DOX17againstowncontroln2	0	31	0	22	0.584906
DOX17againstowncontroln2	SRCRB4D	44	132054	111	484438	0.0245821	0.704616	SRCRB4D	DOX17againstowncontroln2	6	25	13	18	0.709677
DOX17againstowncontroln2	KCNMA1	19	132054	38	484438	0.0252322	0.711182	KCNMA1	DOX17againstowncontroln2	0	18	1	8	0.703704
DOX17againstowncontroln2	C1orf66	7	132054	8	484438	0.0259604	0.711182	C1orf66	DOX17againstowncontroln2	3	4	0	1	0.875
DOX17againstowncontroln2	FZD2	7	132054	8	484438	0.0259604	0.711182	FZD2	DOX17againstowncontroln2	2	0	5	0	1
DOX17againstowncontroln2	GAL3ST3	7	132054	8	484438	0.0259604	0.711182	GAL3ST3	DOX17againstowncontroln2	0	7	0	1	0.875
DOX17againstowncontroln2	NCDN	7	132054	8	484438	0.0259604	0.711182	NCDN	DOX17againstowncontroln2	2	4	1	2	0.777778
DOX17againstowncontroln2	PTENP1	7	132054	8	484438	0.0259604	0.711182	PTENP1	DOX17againstowncontroln2	3	0	4	0	1
DOX17againstowncontroln2	RCL1	7	132054	8	484438	0.0259604	0.711182	RCL1	DOX17againstowncontroln2	0	7	0	2	0.777778
DOX17againstowncontroln2	ADRM1	5	132054	4	484438	0.0260945	0.711182	ADRM1	DOX17againstowncontroln2	1	4	0	2	0.714286
DOX17againstowncontroln2	ALDH1L1	5	132054	4	484438	0.0260945	0.711182	ALDH1L1	DOX17againstowncontroln2	1	4	0	4	0.555556
DOX17againstowncontroln2	APBB1IP	5	132054	4	484438	0.0260945	0.711182	APBB1IP	DOX17againstowncontroln2	0	5	0	4	0.555556
DOX17againstowncontroln2	ATXN7L3B	5	132054	4	484438	0.0260945	0.711182	ATXN7L3B	DOX17againstowncontroln2	1	0	4	0	1
DOX17againstowncontroln2	FAM110A	5	132054	4	484438	0.0260945	0.711182	FAM110A	DOX17againstowncontroln2	1	4	0	1	0.833333
DOX17againstowncontroln2	FOXG1	5	132054	4	484438	0.0260945	0.711182	FOXG1	DOX17againstowncontroln2	4	0	1	0	1
DOX17againstowncontroln2	GGCX	5	132054	4	484438	0.0260945	0.711182	GGCX	DOX17againstowncontroln2	0	4	1	0	1
DOX17againstowncontroln2	LOC285733	5	132054	4	484438	0.0260945	0.711182	LOC285733	DOX17againstowncontroln2	0	3	2	1	0.833333
DOX17againstowncontroln2	MESP2	5	132054	4	484438	0.0260945	0.711182	MESP2	DOX17againstowncontroln2	2	2	1	0	1
DOX17againstowncontroln2	MRPL53	5	132054	4	484438	0.0260945	0.711182	MRPL53	DOX17againstowncontroln2	4	1	0	1	0.833333
DOX17againstowncontroln2	PNMT	5	132054	4	484438	0.0260945	0.711182	PNMT	DOX17againstowncontroln2	2	0	3	1	0.833333
DOX17againstowncontroln2	PRKX	5	132054	4	484438	0.0260945	0.711182	PRKX	DOX17againstowncontroln2	0	5	0	0	1
DOX17againstowncontroln2	RBL2	5	132054	4	484438	0.0260945	0.711182	RBL2	DOX17againstowncontroln2	1	4	0	2	0.714286
DOX17againstowncontroln2	REEP6	5	132054	4	484438	0.0260945	0.711182	REEP6	DOX17againstowncontroln2	0	4	1	1	0.833333
DOX17againstowncontroln2	SMARCD1	5	132054	4	484438	0.0260945	0.711182	SMARCD1	DOX17againstowncontroln2	0	4	1	1	0.833333
DOX17againstowncontroln2	TLE1	5	132054	4	484438	0.0260945	0.711182	TLE1	DOX17againstowncontroln2	0	5	0	2	0.714286
DOX17againstowncontroln2	WFDC8	5	132054	4	484438	0.0260945	0.711182	WFDC8	DOX17againstowncontroln2	0	5	0	1	0.833333
DOX17againstowncontroln2	ANKRD5	6	132054	6	484438	0.0268708	0.712142	ANKRD5	DOX17againstowncontroln2	0	5	1	3	0.666667
DOX17againstowncontroln2	CCDC122	6	132054	6	484438	0.0268708	0.712142	CCDC122	DOX17againstowncontroln2	0	5	1	6	0.5
DOX17againstowncontroln2	EEF1E1	6	132054	6	484438	0.0268708	0.712142	EEF1E1	DOX17againstowncontroln2	0	6	0	3	0.666667
DOX17againstowncontroln2	FAIM2	6	132054	6	484438	0.0268708	0.712142	FAIM2	DOX17againstowncontroln2	3	2	1	0	1
DOX17againstowncontroln2	IL1RAP	6	132054	6	484438	0.0268708	0.712142	IL1RAP	DOX17againstowncontroln2	0	6	0	4	0.6
DOX17againstowncontroln2	KDELR3	6	132054	6	484438	0.0268708	0.712142	KDELR3	DOX17againstowncontroln2	0	4	2	1	0.857143
DOX17againstowncontroln2	KIAA1109	6	132054	6	484438	0.0268708	0.712142	KIAA1109	DOX17againstowncontroln2	1	4	1	2	0.75
DOX17againstowncontroln2	MAPRE3	6	132054	6	484438	0.0268708	0.712142	MAPRE3	DOX17againstowncontroln2	0	6	0	2	0.75
DOX17againstowncontroln2	NPM1	6	132054	6	484438	0.0268708	0.712142	NPM1	DOX17againstowncontroln2	0	6	0	2	0.75
DOX17againstowncontroln2	PPDPF	6	132054	6	484438	0.0268708	0.712142	PPDPF	DOX17againstowncontroln2	0	5	1	0	1
DOX17againstowncontroln2	PRSS27	6	132054	6	484438	0.0268708	0.712142	PRSS27	DOX17againstowncontroln2	2	1	3	0	1
DOX17againstowncontroln2	RNF126	6	132054	6	484438	0.0268708	0.712142	RNF126	DOX17againstowncontroln2	0	6	0	1	0.857143
DOX17againstowncontroln2	SPTY2D1	6	132054	6	484438	0.0268708	0.712142	SPTY2D1	DOX17againstowncontroln2	1	5	0	2	0.75
DOX17againstowncontroln2	SPRYD4	27	132054	61	484438	0.0269268	0.712142	SPRYD4	DOX17againstowncontroln2	12	7	8	7	0.794118
DOX17againstowncontroln2	EIF4A1	14	132054	25	484438	0.0271433	0.712142	EIF4A1	DOX17againstowncontroln2	0	14	0	26	0.35
DOX17againstowncontroln2	ID3	14	132054	25	484438	0.0271433	0.712142	ID3	DOX17againstowncontroln2	7	4	3	1	0.933333
DOX17againstowncontroln2	RPS27A	14	132054	25	484438	0.0271433	0.712142	RPS27A	DOX17againstowncontroln2	5	6	3	5	0.736842
DOX17againstowncontroln2	MNT	94	132054	271	484438	0.0272697	0.712142	MNT	DOX17againstowncontroln2	4	88	2	77	0.549708
DOX17againstowncontroln2	REPS1	28	132054	64	484438	0.0272828	0.712142	REPS1	DOX17againstowncontroln2	0	28	0	30	0.482759
DOX17againstowncontroln2	ENOX1	44	132054	112	484438	0.0273043	0.712142	ENOX1	DOX17againstowncontroln2	1	43	0	28	0.611111
DOX17againstowncontroln2	JUND	10	132054	15	484438	0.0273815	0.712142	JUND	DOX17againstowncontroln2	4	0	6	0	1
DOX17againstowncontroln2	UNC119B	10	132054	15	484438	0.0273815	0.712142	UNC119B	DOX17againstowncontroln2	1	9	0	4	0.714286
DOX17againstowncontroln2	COL2A1	17	132054	33	484438	0.0273992	0.712142	COL2A1	DOX17againstowncontroln2	1	15	1	13	0.566667
DOX17againstowncontroln2	ATP5G2	43	132054	109	484438	0.027489	0.712142	ATP5G2	DOX17againstowncontroln2	3	31	9	23	0.651515
DOX17againstowncontroln2	SLC4A8	43	132054	109	484438	0.027489	0.712142	SLC4A8	DOX17againstowncontroln2	1	37	5	28	0.605634
DOX17againstowncontroln2	EYS	115	132054	340	484438	0.0275278	0.712142	EYS	DOX17againstowncontroln2	0	115	0	102	0.529954
DOX17againstowncontroln2	APBA2	29	132054	67	484438	0.0275754	0.712142	APBA2	DOX17againstowncontroln2	0	29	0	13	0.690476
DOX17againstowncontroln2	CENPBD1	12	132054	20	484438	0.0279254	0.717004	CENPBD1	DOX17againstowncontroln2	5	0	7	0	1
DOX17againstowncontroln2	CUL9	12	132054	20	484438	0.0279254	0.717004	CUL9	DOX17againstowncontroln2	0	12	0	6	0.666667
DOX17againstowncontroln2	NUDCD3	12	132054	20	484438	0.0279254	0.717004	NUDCD3	DOX17againstowncontroln2	1	10	1	4	0.75
DOX17againstowncontroln2	UBE2V1	39	132054	97	484438	0.0280664	0.719236	UBE2V1	DOX17againstowncontroln2	3	29	7	27	0.590909
DOX17againstowncontroln2	RPP25	18	132054	36	484438	0.0288895	0.738905	RPP25	DOX17againstowncontroln2	11	0	7	0	1
DOX17againstowncontroln2	CUL3	23	132054	50	484438	0.0289793	0.73978	CUL3	DOX17againstowncontroln2	0	23	0	14	0.621622
DOX17againstowncontroln2	CDK19	82	132054	233	484438	0.0291146	0.741808	CDK19	DOX17againstowncontroln2	25	34	23	33	0.713043
DOX17againstowncontroln2	IMMP1L	15	132054	28	484438	0.0294258	0.746877	IMMP1L	DOX17againstowncontroln2	0	15	0	12	0.555556
DOX17againstowncontroln2	RPS6KA2	15	132054	28	484438	0.0294258	0.746877	RPS6KA2	DOX17againstowncontroln2	1	13	1	4	0.789474
DOX17againstowncontroln2	TMEM107	24	132054	53	484438	0.0296146	0.750236	TMEM107	DOX17againstowncontroln2	6	11	7	17	0.585366
DOX17againstowncontroln2	B3GNT1	25	132054	56	484438	0.0301515	0.756257	B3GNT1	DOX17againstowncontroln2	14	0	11	1	0.961538
DOX17againstowncontroln2	HIRIP3	25	132054	56	484438	0.0301515	0.756257	HIRIP3	DOX17againstowncontroln2	10	1	14	1	0.961538
DOX17againstowncontroln2	FRAT2	19	132054	39	484438	0.030183	0.756257	FRAT2	DOX17againstowncontroln2	10	0	9	0	1
DOX17againstowncontroln2	MFHAS1	19	132054	39	484438	0.030183	0.756257	MFHAS1	DOX17againstowncontroln2	2	15	2	7	0.730769
DOX17againstowncontroln2	RNF4	19	132054	39	484438	0.030183	0.756257	RNF4	DOX17againstowncontroln2	5	10	4	7	0.730769
DOX17againstowncontroln2	C19orf73	9	132054	13	484438	0.0307052	0.756257	C19orf73	DOX17againstowncontroln2	6	0	3	0	1
DOX17againstowncontroln2	EEF1B2	9	132054	13	484438	0.0307052	0.756257	EEF1B2	DOX17againstowncontroln2	0	7	2	3	0.75
DOX17againstowncontroln2	FRAT1	9	132054	13	484438	0.0307052	0.756257	FRAT1	DOX17againstowncontroln2	7	0	2	0	1
DOX17againstowncontroln2	HMGB1	9	132054	13	484438	0.0307052	0.756257	HMGB1	DOX17againstowncontroln2	0	8	1	3	0.75
DOX17againstowncontroln2	JAK2	9	132054	13	484438	0.0307052	0.756257	JAK2	DOX17againstowncontroln2	0	9	0	4	0.692308
DOX17againstowncontroln2	LRP2BP	9	132054	13	484438	0.0307052	0.756257	LRP2BP	DOX17againstowncontroln2	0	8	1	2	0.818182
DOX17againstowncontroln2	PRL	9	132054	13	484438	0.0307052	0.756257	PRL	DOX17againstowncontroln2	2	7	0	5	0.642857
DOX17againstowncontroln2	RPS6KA6	9	132054	13	484438	0.0307052	0.756257	RPS6KA6	DOX17againstowncontroln2	0	9	0	4	0.692308
DOX17againstowncontroln2	SLC5A3	9	132054	13	484438	0.0307052	0.756257	SLC5A3	DOX17againstowncontroln2	1	8	0	4	0.692308
DOX17againstowncontroln2	WDR45L	9	132054	13	484438	0.0307052	0.756257	WDR45L	DOX17againstowncontroln2	0	8	1	4	0.692308
DOX17againstowncontroln2	FAM78A	69	132054	192	484438	0.0310041	0.760832	FAM78A	DOX17againstowncontroln2	10	47	12	36	0.657143
DOX17againstowncontroln2	PARP11	13	132054	23	484438	0.0310501	0.760832	PARP11	DOX17againstowncontroln2	2	6	5	4	0.764706
DOX17againstowncontroln2	TSR1	40	132054	101	484438	0.0311466	0.760832	TSR1	DOX17againstowncontroln2	26	2	12	17	0.701754
DOX17againstowncontroln2	VPS41	40	132054	101	484438	0.0311466	0.760832	VPS41	DOX17againstowncontroln2	0	40	0	43	0.481928
DOX17againstowncontroln2	MAGI1	28	132054	65	484438	0.0312624	0.760832	MAGI1	DOX17againstowncontroln2	0	25	3	22	0.56
DOX17againstowncontroln2	WRB	20	132054	42	484438	0.0312989	0.760832	WRB	DOX17againstowncontroln2	0	20	0	12	0.625
DOX17againstowncontroln2	C5orf28	16	132054	31	484438	0.0314058	0.760832	C5orf28	DOX17againstowncontroln2	0	16	0	3	0.842105
DOX17againstowncontroln2	C9orf100	16	132054	31	484438	0.0314058	0.760832	C9orf100	DOX17againstowncontroln2	6	7	3	5	0.761905
DOX17againstowncontroln2	TOPBP1	16	132054	31	484438	0.0314058	0.760832	TOPBP1	DOX17againstowncontroln2	1	13	2	12	0.571429
DOX17againstowncontroln2	CEP250	29	132054	68	484438	0.0314922	0.761539	CEP250	DOX17againstowncontroln2	4	20	5	9	0.763158
DOX17againstowncontroln2	NEIL1	30	132054	71	484438	0.0316628	0.764276	NEIL1	DOX17againstowncontroln2	8	16	6	19	0.612245
DOX17againstowncontroln2	CEPT1	11	132054	18	484438	0.0317862	0.765864	CEPT1	DOX17againstowncontroln2	1	8	2	2	0.846154
DOX17againstowncontroln2	LARGE	34	132054	83	484438	0.0318612	0.766212	LARGE	DOX17againstowncontroln2	0	34	0	28	0.548387
DOX17againstowncontroln2	ADAM8	3	132054	1	484438	0.032998	0.766212	ADAM8	DOX17againstowncontroln2	3	0	0	0	1
DOX17againstowncontroln2	ARHGAP11B	3	132054	1	484438	0.032998	0.766212	ARHGAP11B	DOX17againstowncontroln2	1	2	0	0	1
DOX17againstowncontroln2	C6orf208	3	132054	1	484438	0.032998	0.766212	C6orf208	DOX17againstowncontroln2	0	3	0	0	1
DOX17againstowncontroln2	CYSLTR1	3	132054	1	484438	0.032998	0.766212	CYSLTR1	DOX17againstowncontroln2	0	2	1	1	0.75
DOX17againstowncontroln2	ERN2	3	132054	1	484438	0.032998	0.766212	ERN2	DOX17againstowncontroln2	0	3	0	1	0.75
DOX17againstowncontroln2	EXOC8	3	132054	1	484438	0.032998	0.766212	EXOC8	DOX17againstowncontroln2	0	0	3	0	1
DOX17againstowncontroln2	FOXF1	3	132054	1	484438	0.032998	0.766212	FOXF1	DOX17againstowncontroln2	2	1	0	0	1
DOX17againstowncontroln2	GBX2	3	132054	1	484438	0.032998	0.766212	GBX2	DOX17againstowncontroln2	1	0	2	1	0.75
DOX17againstowncontroln2	HES6	3	132054	1	484438	0.032998	0.766212	HES6	DOX17againstowncontroln2	1	1	1	0	1
DOX17againstowncontroln2	HIST1H4A	3	132054	1	484438	0.032998	0.766212	HIST1H4A	DOX17againstowncontroln2	3	0	0	0	1
DOX17againstowncontroln2	LPAR1	3	132054	1	484438	0.032998	0.766212	LPAR1	DOX17againstowncontroln2	0	3	0	0	1
DOX17againstowncontroln2	LRRC3	3	132054	1	484438	0.032998	0.766212	LRRC3	DOX17againstowncontroln2	1	1	1	0	1
DOX17againstowncontroln2	MAP3K7	3	132054	1	484438	0.032998	0.766212	MAP3K7	DOX17againstowncontroln2	0	3	0	2	0.6
DOX17againstowncontroln2	PLXNA3	3	132054	1	484438	0.032998	0.766212	PLXNA3	DOX17againstowncontroln2	1	2	0	1	0.75
DOX17againstowncontroln2	PTGIS	3	132054	1	484438	0.032998	0.766212	PTGIS	DOX17againstowncontroln2	1	2	0	3	0.5
DOX17againstowncontroln2	PWWP2A	3	132054	1	484438	0.032998	0.766212	PWWP2A	DOX17againstowncontroln2	2	0	1	3	0.5
DOX17againstowncontroln2	TMEM35	3	132054	1	484438	0.032998	0.766212	TMEM35	DOX17againstowncontroln2	0	1	2	0	1
DOX17againstowncontroln2	TNFRSF13C	3	132054	1	484438	0.032998	0.766212	TNFRSF13C	DOX17againstowncontroln2	0	0	3	0	1
DOX17againstowncontroln2	UTF1	3	132054	1	484438	0.032998	0.766212	UTF1	DOX17againstowncontroln2	2	0	1	0	1
DOX17againstowncontroln2	COG8	22	132054	48	484438	0.0330681	0.766212	COG8	DOX17againstowncontroln2	2	17	3	9	0.709677
DOX17againstowncontroln2	USP13	22	132054	48	484438	0.0330681	0.766212	USP13	DOX17againstowncontroln2	0	21	1	8	0.733333
DOX17againstowncontroln2	AP1G2	8	132054	11	484438	0.0342295	0.784329	AP1G2	DOX17againstowncontroln2	4	3	1	2	0.8
DOX17againstowncontroln2	C10orf114	8	132054	11	484438	0.0342295	0.784329	C10orf114	DOX17againstowncontroln2	5	0	3	2	0.8
DOX17againstowncontroln2	CLMN	8	132054	11	484438	0.0342295	0.784329	CLMN	DOX17againstowncontroln2	0	8	0	4	0.666667
DOX17againstowncontroln2	HUNK	8	132054	11	484438	0.0342295	0.784329	HUNK	DOX17againstowncontroln2	0	8	0	3	0.727273
DOX17againstowncontroln2	IRF2BP1	8	132054	11	484438	0.0342295	0.784329	IRF2BP1	DOX17againstowncontroln2	7	0	1	0	1
DOX17againstowncontroln2	SLC22A18	8	132054	11	484438	0.0342295	0.784329	SLC22A18	DOX17againstowncontroln2	0	8	0	4	0.666667
DOX17againstowncontroln2	C16orf45	24	132054	54	484438	0.0343218	0.784329	C16orf45	DOX17againstowncontroln2	0	24	0	15	0.615385
DOX17againstowncontroln2	DENND5B	24	132054	54	484438	0.0343218	0.784329	DENND5B	DOX17againstowncontroln2	11	8	5	6	0.8
DOX17againstowncontroln2	ELP2P	18	132054	37	484438	0.034577	0.785724	ELP2P	DOX17againstowncontroln2	6	0	12	0	1
DOX17againstowncontroln2	FAM53C	18	132054	37	484438	0.034577	0.785724	FAM53C	DOX17againstowncontroln2	1	15	2	3	0.857143
DOX17againstowncontroln2	SEMA3D	18	132054	37	484438	0.034577	0.785724	SEMA3D	DOX17againstowncontroln2	5	9	4	5	0.782609
DOX17againstowncontroln2	NYX	40	132054	102	484438	0.0346191	0.785724	NYX	DOX17againstowncontroln2	25	3	12	5	0.888889
DOX17againstowncontroln2	SWAP70	26	132054	60	484438	0.0351615	0.796553	SWAP70	DOX17againstowncontroln2	0	25	1	15	0.634146
DOX17againstowncontroln2	CDCA7L	12	132054	21	484438	0.0355486	0.796553	CDCA7L	DOX17againstowncontroln2	0	11	1	5	0.705882
DOX17againstowncontroln2	GSG2	12	132054	21	484438	0.0355486	0.796553	GSG2	DOX17againstowncontroln2	2	0	10	0	1
DOX17againstowncontroln2	PPP1R9B	12	132054	21	484438	0.0355486	0.796553	PPP1R9B	DOX17againstowncontroln2	5	0	7	1	0.923077
DOX17againstowncontroln2	SLC19A1	12	132054	21	484438	0.0355486	0.796553	SLC19A1	DOX17againstowncontroln2	0	12	0	8	0.6
DOX17againstowncontroln2	SLC5A10	12	132054	21	484438	0.0355486	0.796553	SLC5A10	DOX17againstowncontroln2	0	12	0	4	0.75
DOX17againstowncontroln2	STK3	12	132054	21	484438	0.0355486	0.796553	STK3	DOX17againstowncontroln2	0	12	0	8	0.6
DOX17againstowncontroln2	ARID1B	60	132054	165	484438	0.0356049	0.796553	ARID1B	DOX17againstowncontroln2	12	35	13	42	0.588235
DOX17againstowncontroln2	PPP4R1	28	132054	66	484438	0.0356689	0.796553	PPP4R1	DOX17againstowncontroln2	0	27	1	23	0.54902
DOX17againstowncontroln2	CHD3	47	132054	124	484438	0.0356952	0.796553	CHD3	DOX17againstowncontroln2	3	35	9	37	0.559524
DOX17againstowncontroln2	CN5H6.4	15	132054	29	484438	0.0360424	0.797603	CN5H6.4	DOX17againstowncontroln2	10	0	5	0	1
DOX17againstowncontroln2	CPEB2	15	132054	29	484438	0.0360424	0.797603	CPEB2	DOX17againstowncontroln2	4	10	1	5	0.75
DOX17againstowncontroln2	UNKL	15	132054	29	484438	0.0360424	0.797603	UNKL	DOX17againstowncontroln2	1	13	1	11	0.576923
DOX17againstowncontroln2	GPD1	10	132054	16	484438	0.036162	0.797603	GPD1	DOX17againstowncontroln2	7	0	3	0	1
DOX17againstowncontroln2	LRSAM1	10	132054	16	484438	0.036162	0.797603	LRSAM1	DOX17againstowncontroln2	2	5	3	5	0.666667
DOX17againstowncontroln2	PSMD11	10	132054	16	484438	0.036162	0.797603	PSMD11	DOX17againstowncontroln2	1	9	0	9	0.526316
DOX17againstowncontroln2	ZC3HAV1L	10	132054	16	484438	0.036162	0.797603	ZC3HAV1L	DOX17againstowncontroln2	0	9	1	2	0.833333
DOX17againstowncontroln2	SRRM3	20	132054	43	484438	0.0368782	0.812054	SRRM3	DOX17againstowncontroln2	0	20	0	12	0.625
DOX17againstowncontroln2	CELF2	42	132054	109	484438	0.0376659	0.82074	CELF2	DOX17againstowncontroln2	4	36	2	27	0.608696
DOX17againstowncontroln2	CSF1	7	132054	9	484438	0.0377908	0.82074	CSF1	DOX17againstowncontroln2	1	3	3	0	1
DOX17againstowncontroln2	FAHD1	7	132054	9	484438	0.0377908	0.82074	FAHD1	DOX17againstowncontroln2	4	2	1	0	1
DOX17againstowncontroln2	NKRF	7	132054	9	484438	0.0377908	0.82074	NKRF	DOX17againstowncontroln2	2	5	0	1	0.875
DOX17againstowncontroln2	PELI1	7	132054	9	484438	0.0377908	0.82074	PELI1	DOX17againstowncontroln2	1	6	0	2	0.777778
DOX17againstowncontroln2	PRMT6	7	132054	9	484438	0.0377908	0.82074	PRMT6	DOX17againstowncontroln2	2	0	5	0	1
DOX17againstowncontroln2	SLC35E4	7	132054	9	484438	0.0377908	0.82074	SLC35E4	DOX17againstowncontroln2	1	2	4	1	0.875
DOX17againstowncontroln2	VAX2	7	132054	9	484438	0.0377908	0.82074	VAX2	DOX17againstowncontroln2	0	7	0	3	0.7
DOX17againstowncontroln2	CADPS2	16	132054	32	484438	0.0380004	0.82074	CADPS2	DOX17againstowncontroln2	0	16	0	10	0.615385
DOX17againstowncontroln2	C5orf41	22	132054	49	484438	0.0384931	0.82074	C5orf41	DOX17againstowncontroln2	12	2	8	4	0.846154
DOX17againstowncontroln2	BRD9	13	132054	24	484438	0.0387363	0.82074	BRD9	DOX17againstowncontroln2	1	8	4	10	0.565217
DOX17againstowncontroln2	NME4	13	132054	24	484438	0.0387363	0.82074	NME4	DOX17againstowncontroln2	2	5	6	6	0.684211
DOX17againstowncontroln2	ZZZ3	13	132054	24	484438	0.0387363	0.82074	ZZZ3	DOX17againstowncontroln2	0	13	0	6	0.684211
DOX17againstowncontroln2	ARIH1	23	132054	52	484438	0.03909	0.82074	ARIH1	DOX17againstowncontroln2	2	18	3	12	0.657143
DOX17againstowncontroln2	HIGD2B	36	132054	91	484438	0.0396037	0.82074	HIGD2B	DOX17againstowncontroln2	10	19	7	14	0.72
DOX17againstowncontroln2	SUV420H2	17	132054	35	484438	0.0396557	0.82074	SUV420H2	DOX17againstowncontroln2	2	12	3	9	0.653846
DOX17againstowncontroln2	AASDH	11	132054	19	484438	0.0407336	0.82074	AASDH	DOX17againstowncontroln2	0	10	1	5	0.6875
DOX17againstowncontroln2	ARMC6	11	132054	19	484438	0.0407336	0.82074	ARMC6	DOX17againstowncontroln2	0	11	0	8	0.578947
DOX17againstowncontroln2	ERLIN1	11	132054	19	484438	0.0407336	0.82074	ERLIN1	DOX17againstowncontroln2	1	9	1	7	0.611111
DOX17againstowncontroln2	P2RX4	11	132054	19	484438	0.0407336	0.82074	P2RX4	DOX17againstowncontroln2	1	7	3	2	0.846154
DOX17againstowncontroln2	PUS1	11	132054	19	484438	0.0407336	0.82074	PUS1	DOX17againstowncontroln2	4	2	5	1	0.916667
DOX17againstowncontroln2	RENBP	11	132054	19	484438	0.0407336	0.82074	RENBP	DOX17againstowncontroln2	3	5	3	6	0.647059
DOX17againstowncontroln2	BTN3A1	6	132054	7	484438	0.0410245	0.82074	BTN3A1	DOX17againstowncontroln2	0	6	0	2	0.75
DOX17againstowncontroln2	C11orf71	6	132054	7	484438	0.0410245	0.82074	C11orf71	DOX17againstowncontroln2	1	2	3	2	0.75
DOX17againstowncontroln2	C16orf42	6	132054	7	484438	0.0410245	0.82074	C16orf42	DOX17againstowncontroln2	1	2	3	1	0.857143
DOX17againstowncontroln2	CATSPER1	6	132054	7	484438	0.0410245	0.82074	CATSPER1	DOX17againstowncontroln2	0	1	5	1	0.857143
DOX17againstowncontroln2	GABARAPL1	6	132054	7	484438	0.0410245	0.82074	GABARAPL1	DOX17againstowncontroln2	0	6	0	3	0.666667
DOX17againstowncontroln2	GDAP2	6	132054	7	484438	0.0410245	0.82074	GDAP2	DOX17againstowncontroln2	0	6	0	1	0.857143
DOX17againstowncontroln2	GRM1	6	132054	7	484438	0.0410245	0.82074	GRM1	DOX17againstowncontroln2	0	6	0	1	0.857143
DOX17againstowncontroln2	MYO6	6	132054	7	484438	0.0410245	0.82074	MYO6	DOX17againstowncontroln2	1	4	1	0	1
DOX17againstowncontroln2	YTHDF1	6	132054	7	484438	0.0410245	0.82074	YTHDF1	DOX17againstowncontroln2	0	6	0	5	0.545455
DOX17againstowncontroln2	TMUB1	18	132054	38	484438	0.0410455	0.82074	TMUB1	DOX17againstowncontroln2	6	4	8	5	0.782609
DOX17againstowncontroln2	C3orf1	9	132054	14	484438	0.0410958	0.82074	C3orf1	DOX17againstowncontroln2	1	7	1	0	1
DOX17againstowncontroln2	COX15	9	132054	14	484438	0.0410958	0.82074	COX15	DOX17againstowncontroln2	2	4	3	4	0.692308
DOX17againstowncontroln2	MBOAT2	9	132054	14	484438	0.0410958	0.82074	MBOAT2	DOX17againstowncontroln2	0	9	0	4	0.692308
DOX17againstowncontroln2	NOTCH3	9	132054	14	484438	0.0410958	0.82074	NOTCH3	DOX17againstowncontroln2	0	8	1	2	0.818182
DOX17againstowncontroln2	RBM34	9	132054	14	484438	0.0410958	0.82074	RBM34	DOX17againstowncontroln2	3	5	1	3	0.75
DOX17againstowncontroln2	SEPT8	9	132054	14	484438	0.0410958	0.82074	SEPT8	DOX17againstowncontroln2	1	7	1	7	0.5625
DOX17againstowncontroln2	SFRS9	9	132054	14	484438	0.0410958	0.82074	SFRS9	DOX17againstowncontroln2	0	7	2	5	0.642857
DOX17againstowncontroln2	UBL4A	9	132054	14	484438	0.0410958	0.82074	UBL4A	DOX17againstowncontroln2	5	2	2	1	0.9
DOX17againstowncontroln2	LOC100192378	14	132054	27	484438	0.0414206	0.82074	LOC100192378	DOX17againstowncontroln2	2	12	0	14	0.5
DOX17againstowncontroln2	SHMT1	14	132054	27	484438	0.0414206	0.82074	SHMT1	DOX17againstowncontroln2	0	14	0	8	0.636364
DOX17againstowncontroln2	C1orf53	4	132054	3	484438	0.0421529	0.82074	C1orf53	DOX17againstowncontroln2	0	4	0	2	0.666667
DOX17againstowncontroln2	C2CD4C	4	132054	3	484438	0.0421529	0.82074	C2CD4C	DOX17againstowncontroln2	1	2	1	1	0.8
DOX17againstowncontroln2	CEBPA	4	132054	3	484438	0.0421529	0.82074	CEBPA	DOX17againstowncontroln2	4	0	0	0	1
DOX17againstowncontroln2	CRELD2	4	132054	3	484438	0.0421529	0.82074	CRELD2	DOX17againstowncontroln2	0	2	2	0	1
DOX17againstowncontroln2	CSRP1	4	132054	3	484438	0.0421529	0.82074	CSRP1	DOX17againstowncontroln2	0	4	0	3	0.571429
DOX17againstowncontroln2	EPS8L1	4	132054	3	484438	0.0421529	0.82074	EPS8L1	DOX17againstowncontroln2	0	4	0	4	0.5
DOX17againstowncontroln2	FAM163A	4	132054	3	484438	0.0421529	0.82074	FAM163A	DOX17againstowncontroln2	0	2	2	2	0.666667
DOX17againstowncontroln2	LOC100287227	4	132054	3	484438	0.0421529	0.82074	LOC100287227	DOX17againstowncontroln2	3	0	1	0	1
DOX17againstowncontroln2	LOC729156	4	132054	3	484438	0.0421529	0.82074	LOC729156	DOX17againstowncontroln2	2	2	0	2	0.666667
DOX17againstowncontroln2	MYO15A	4	132054	3	484438	0.0421529	0.82074	MYO15A	DOX17againstowncontroln2	2	2	0	2	0.666667
DOX17againstowncontroln2	NDST2	4	132054	3	484438	0.0421529	0.82074	NDST2	DOX17againstowncontroln2	0	3	1	0	1
DOX17againstowncontroln2	NYNRIN	4	132054	3	484438	0.0421529	0.82074	NYNRIN	DOX17againstowncontroln2	2	2	0	0	1
DOX17againstowncontroln2	PEBP1	4	132054	3	484438	0.0421529	0.82074	PEBP1	DOX17againstowncontroln2	0	4	0	2	0.666667
DOX17againstowncontroln2	RAB3IL1	4	132054	3	484438	0.0421529	0.82074	RAB3IL1	DOX17againstowncontroln2	0	4	0	2	0.666667
DOX17againstowncontroln2	REEP4	4	132054	3	484438	0.0421529	0.82074	REEP4	DOX17againstowncontroln2	1	1	2	0	1
DOX17againstowncontroln2	SDHAF1	4	132054	3	484438	0.0421529	0.82074	SDHAF1	DOX17againstowncontroln2	2	0	2	0	1
DOX17againstowncontroln2	SNORD104	4	132054	3	484438	0.0421529	0.82074	SNORD104	DOX17againstowncontroln2	1	0	3	0	1
DOX17againstowncontroln2	TMEM9	4	132054	3	484438	0.0421529	0.82074	TMEM9	DOX17againstowncontroln2	0	3	1	1	0.8
DOX17againstowncontroln2	TRIM27	4	132054	3	484438	0.0421529	0.82074	TRIM27	DOX17againstowncontroln2	1	3	0	2	0.666667
DOX17againstowncontroln2	EIF3D	19	132054	41	484438	0.0422025	0.82074	EIF3D	DOX17againstowncontroln2	0	18	1	19	0.5
DOX17againstowncontroln2	CNBD1	5	132054	5	484438	0.0431186	0.82074	CNBD1	DOX17againstowncontroln2	0	5	0	0	1
DOX17againstowncontroln2	EGLN2	5	132054	5	484438	0.0431186	0.82074	EGLN2	DOX17againstowncontroln2	0	4	1	1	0.833333
DOX17againstowncontroln2	GAL3ST4	5	132054	5	484438	0.0431186	0.82074	GAL3ST4	DOX17againstowncontroln2	5	0	0	0	1
DOX17againstowncontroln2	LOC344595	5	132054	5	484438	0.0431186	0.82074	LOC344595	DOX17againstowncontroln2	1	4	0	1	0.833333
DOX17againstowncontroln2	PMAIP1	5	132054	5	484438	0.0431186	0.82074	PMAIP1	DOX17againstowncontroln2	0	5	0	4	0.555556
DOX17againstowncontroln2	PTPN22	5	132054	5	484438	0.0431186	0.82074	PTPN22	DOX17againstowncontroln2	3	1	1	0	1
DOX17againstowncontroln2	RPRML	5	132054	5	484438	0.0431186	0.82074	RPRML	DOX17againstowncontroln2	2	0	3	0	1
DOX17againstowncontroln2	SFPQ	5	132054	5	484438	0.0431186	0.82074	SFPQ	DOX17againstowncontroln2	2	0	3	1	0.833333
DOX17againstowncontroln2	ZNF23	5	132054	5	484438	0.0431186	0.82074	ZNF23	DOX17againstowncontroln2	1	3	1	1	0.833333
DOX17againstowncontroln2	ZNF646	5	132054	5	484438	0.0431186	0.82074	ZNF646	DOX17againstowncontroln2	0	2	3	4	0.555556
DOX17againstowncontroln2	C6orf170	20	132054	44	484438	0.0431555	0.82074	C6orf170	DOX17againstowncontroln2	0	19	1	11	0.645161
DOX17againstowncontroln2	CNNM4	20	132054	44	484438	0.0431555	0.82074	CNNM4	DOX17againstowncontroln2	4	13	3	5	0.8
DOX17againstowncontroln2	DPH1	20	132054	44	484438	0.0431555	0.82074	DPH1	DOX17againstowncontroln2	5	11	4	7	0.740741
DOX17againstowncontroln2	ZNF668	20	132054	44	484438	0.0431555	0.82074	ZNF668	DOX17againstowncontroln2	8	6	6	3	0.869565
DOX17againstowncontroln2	TNPO2	46	132054	123	484438	0.043474	0.82074	TNPO2	DOX17againstowncontroln2	10	28	8	37	0.554217
DOX17againstowncontroln2	DALRD3	15	132054	30	484438	0.043668	0.82074	DALRD3	DOX17againstowncontroln2	0	13	2	5	0.75
DOX17againstowncontroln2	LYPLAL1	15	132054	30	484438	0.043668	0.82074	LYPLAL1	DOX17againstowncontroln2	2	11	2	8	0.652174
DOX17againstowncontroln2	PBK	15	132054	30	484438	0.043668	0.82074	PBK	DOX17againstowncontroln2	0	13	2	4	0.789474
DOX17againstowncontroln2	BNC2	37	132054	95	484438	0.0436797	0.82074	BNC2	DOX17againstowncontroln2	0	37	0	18	0.672727
DOX17againstowncontroln2	CCNO	12	132054	22	484438	0.0445339	0.82074	CCNO	DOX17againstowncontroln2	2	4	6	3	0.8
DOX17againstowncontroln2	LOC80054	12	132054	22	484438	0.0445339	0.82074	LOC80054	DOX17againstowncontroln2	6	0	6	0	1
DOX17againstowncontroln2	RPS26	12	132054	22	484438	0.0445339	0.82074	RPS26	DOX17againstowncontroln2	4	5	3	6	0.666667
DOX17againstowncontroln2	RASAL2	50	132054	136	484438	0.0449081	0.82074	RASAL2	DOX17againstowncontroln2	3	44	3	45	0.526316
DOX17againstowncontroln2	CDK13	33	132054	83	484438	0.0450199	0.82074	CDK13	DOX17againstowncontroln2	6	25	2	18	0.647059
DOX17againstowncontroln2	NKTR	23	132054	53	484438	0.0450251	0.82074	NKTR	DOX17againstowncontroln2	4	18	1	8	0.741935
DOX17againstowncontroln2	SATB2	23	132054	53	484438	0.0450251	0.82074	SATB2	DOX17againstowncontroln2	7	16	0	12	0.657143
DOX17againstowncontroln2	MYC	16	132054	33	484438	0.0455378	0.82074	MYC	DOX17againstowncontroln2	5	0	11	0	1
DOX17againstowncontroln2	OSMR	30	132054	74	484438	0.0456704	0.82074	OSMR	DOX17againstowncontroln2	1	27	2	13	0.697674
DOX17againstowncontroln2	PGPEP1	28	132054	68	484438	0.0458596	0.82074	PGPEP1	DOX17againstowncontroln2	11	0	17	2	0.933333
DOX17againstowncontroln2	A2BP1	2	132054	0	484438	0.0458834	0.82074	A2BP1	DOX17againstowncontroln2	0	2	0	1	0.666667
DOX17againstowncontroln2	ADH1B	2	132054	0	484438	0.0458834	0.82074	ADH1B	DOX17againstowncontroln2	1	1	0	0	1
DOX17againstowncontroln2	ARHGAP22	2	132054	0	484438	0.0458834	0.82074	ARHGAP22	DOX17againstowncontroln2	0	2	0	0	1
DOX17againstowncontroln2	ASB6	2	132054	0	484438	0.0458834	0.82074	ASB6	DOX17againstowncontroln2	0	2	0	2	0.5
DOX17againstowncontroln2	BSPRY	2	132054	0	484438	0.0458834	0.82074	BSPRY	DOX17againstowncontroln2	0	2	0	0	1
DOX17againstowncontroln2	C6orf155	2	132054	0	484438	0.0458834	0.82074	C6orf155	DOX17againstowncontroln2	0	1	1	0	1
DOX17againstowncontroln2	C7orf53	2	132054	0	484438	0.0458834	0.82074	C7orf53	DOX17againstowncontroln2	0	2	0	0	1
DOX17againstowncontroln2	FAM19A3	2	132054	0	484438	0.0458834	0.82074	FAM19A3	DOX17againstowncontroln2	0	2	0	0	1
DOX17againstowncontroln2	FAM46D	2	132054	0	484438	0.0458834	0.82074	FAM46D	DOX17againstowncontroln2	0	2	0	0	1
DOX17againstowncontroln2	FSCN3	2	132054	0	484438	0.0458834	0.82074	FSCN3	DOX17againstowncontroln2	0	1	1	0	1
DOX17againstowncontroln2	GGTA1	2	132054	0	484438	0.0458834	0.82074	GGTA1	DOX17againstowncontroln2	0	2	0	2	0.5
DOX17againstowncontroln2	GPR37	2	132054	0	484438	0.0458834	0.82074	GPR37	DOX17againstowncontroln2	2	0	0	0	1
DOX17againstowncontroln2	GPT	2	132054	0	484438	0.0458834	0.82074	GPT	DOX17againstowncontroln2	1	0	1	0	1
DOX17againstowncontroln2	HIST1H2BE	2	132054	0	484438	0.0458834	0.82074	HIST1H2BE	DOX17againstowncontroln2	1	0	1	0	1
DOX17againstowncontroln2	ITGB1BP2	2	132054	0	484438	0.0458834	0.82074	ITGB1BP2	DOX17againstowncontroln2	0	1	1	0	1
DOX17againstowncontroln2	KRT27	2	132054	0	484438	0.0458834	0.82074	KRT27	DOX17againstowncontroln2	0	1	1	0	1
DOX17againstowncontroln2	LOC282997	2	132054	0	484438	0.0458834	0.82074	LOC282997	DOX17againstowncontroln2	0	0	2	0	1
DOX17againstowncontroln2	MGC16121	2	132054	0	484438	0.0458834	0.82074	MGC16121	DOX17againstowncontroln2	1	1	0	0	1
DOX17againstowncontroln2	MIR92B	2	132054	0	484438	0.0458834	0.82074	MIR92B	DOX17againstowncontroln2	1	0	1	0	1
DOX17againstowncontroln2	NCRNA00087	2	132054	0	484438	0.0458834	0.82074	NCRNA00087	DOX17againstowncontroln2	0	1	1	0	1
DOX17againstowncontroln2	NCRNA00240	2	132054	0	484438	0.0458834	0.82074	NCRNA00240	DOX17againstowncontroln2	0	2	0	0	1
DOX17againstowncontroln2	NDRG1	2	132054	0	484438	0.0458834	0.82074	NDRG1	DOX17againstowncontroln2	0	2	0	0	1
DOX17againstowncontroln2	NEXN	2	132054	0	484438	0.0458834	0.82074	NEXN	DOX17againstowncontroln2	0	2	0	0	1
DOX17againstowncontroln2	PEX3	2	132054	0	484438	0.0458834	0.82074	PEX3	DOX17againstowncontroln2	0	2	0	1	0.666667
DOX17againstowncontroln2	PHACTR3	2	132054	0	484438	0.0458834	0.82074	PHACTR3	DOX17againstowncontroln2	0	2	0	0	1
DOX17againstowncontroln2	PKP3	2	132054	0	484438	0.0458834	0.82074	PKP3	DOX17againstowncontroln2	0	0	2	2	0.5
DOX17againstowncontroln2	PSMA8	2	132054	0	484438	0.0458834	0.82074	PSMA8	DOX17againstowncontroln2	0	2	0	0	1
DOX17againstowncontroln2	PTRH1	2	132054	0	484438	0.0458834	0.82074	PTRH1	DOX17againstowncontroln2	0	1	1	0	1
DOX17againstowncontroln2	RERG	2	132054	0	484438	0.0458834	0.82074	RERG	DOX17againstowncontroln2	0	2	0	2	0.5
DOX17againstowncontroln2	RPRM	2	132054	0	484438	0.0458834	0.82074	RPRM	DOX17againstowncontroln2	0	0	2	0	1
DOX17againstowncontroln2	RSAD2	2	132054	0	484438	0.0458834	0.82074	RSAD2	DOX17againstowncontroln2	0	2	0	0	1
DOX17againstowncontroln2	S100A1	2	132054	0	484438	0.0458834	0.82074	S100A1	DOX17againstowncontroln2	0	2	0	0	1
DOX17againstowncontroln2	SEMA3G	2	132054	0	484438	0.0458834	0.82074	SEMA3G	DOX17againstowncontroln2	0	2	0	0	1
DOX17againstowncontroln2	SLC25A27	2	132054	0	484438	0.0458834	0.82074	SLC25A27	DOX17againstowncontroln2	0	2	0	0	1
DOX17againstowncontroln2	SPATA9	2	132054	0	484438	0.0458834	0.82074	SPATA9	DOX17againstowncontroln2	0	2	0	0	1
DOX17againstowncontroln2	SSC5D	2	132054	0	484438	0.0458834	0.82074	SSC5D	DOX17againstowncontroln2	1	1	0	0	1
DOX17againstowncontroln2	TAC1	2	132054	0	484438	0.0458834	0.82074	TAC1	DOX17againstowncontroln2	1	1	0	0	1
DOX17againstowncontroln2	THUMPD1	2	132054	0	484438	0.0458834	0.82074	THUMPD1	DOX17againstowncontroln2	1	1	0	0	1
DOX17againstowncontroln2	UCP1	2	132054	0	484438	0.0458834	0.82074	UCP1	DOX17againstowncontroln2	1	1	0	0	1
DOX17againstowncontroln2	UGT2B11	2	132054	0	484438	0.0458834	0.82074	UGT2B11	DOX17againstowncontroln2	0	2	0	0	1
DOX17againstowncontroln2	CEBPG	8	132054	12	484438	0.0466083	0.82074	CEBPG	DOX17againstowncontroln2	0	7	1	1	0.888889
DOX17againstowncontroln2	FAM135A	8	132054	12	484438	0.0466083	0.82074	FAM135A	DOX17againstowncontroln2	0	8	0	3	0.727273
DOX17againstowncontroln2	FMNL3	8	132054	12	484438	0.0466083	0.82074	FMNL3	DOX17againstowncontroln2	3	4	1	7	0.533333
DOX17againstowncontroln2	MKI67	8	132054	12	484438	0.0466083	0.82074	MKI67	DOX17againstowncontroln2	2	5	1	4	0.666667
DOX17againstowncontroln2	PGBD4	8	132054	12	484438	0.0466083	0.82074	PGBD4	DOX17againstowncontroln2	2	0	6	0	1
DOX17againstowncontroln2	PTPN23	8	132054	12	484438	0.0466083	0.82074	PTPN23	DOX17againstowncontroln2	0	7	1	2	0.8
DOX17againstowncontroln2	RPS28	8	132054	12	484438	0.0466083	0.82074	RPS28	DOX17againstowncontroln2	2	6	0	5	0.615385
DOX17againstowncontroln2	SPINT1	8	132054	12	484438	0.0466083	0.82074	SPINT1	DOX17againstowncontroln2	3	4	1	3	0.727273
DOX17againstowncontroln2	SUPT6H	8	132054	12	484438	0.0466083	0.82074	SUPT6H	DOX17againstowncontroln2	0	8	0	7	0.533333
DOX17againstowncontroln2	THRAP3	8	132054	12	484438	0.0466083	0.82074	THRAP3	DOX17againstowncontroln2	0	8	0	5	0.615385
DOX17againstowncontroln2	TRAPPC2L	8	132054	12	484438	0.0466083	0.82074	TRAPPC2L	DOX17againstowncontroln2	0	8	0	6	0.571429
DOX17againstowncontroln2	ZMYND12	8	132054	12	484438	0.0466083	0.82074	ZMYND12	DOX17againstowncontroln2	5	1	2	4	0.666667
DOX17againstowncontroln2	ZNF434	8	132054	12	484438	0.0466083	0.82074	ZNF434	DOX17againstowncontroln2	0	8	0	4	0.666667
DOX17againstowncontroln2	ZNF584	8	132054	12	484438	0.0466083	0.82074	ZNF584	DOX17againstowncontroln2	1	4	3	0	1
DOX17againstowncontroln2	BTBD19	10	132054	17	484438	0.0467143	0.82074	BTBD19	DOX17againstowncontroln2	5	0	5	1	0.909091
DOX17againstowncontroln2	C10orf2	10	132054	17	484438	0.0467143	0.82074	C10orf2	DOX17againstowncontroln2	3	0	7	0	1
DOX17againstowncontroln2	CNO	10	132054	17	484438	0.0467143	0.82074	CNO	DOX17againstowncontroln2	6	0	4	0	1
DOX17againstowncontroln2	FZD5	10	132054	17	484438	0.0467143	0.82074	FZD5	DOX17againstowncontroln2	4	0	6	1	0.909091
DOX17againstowncontroln2	PCCA	10	132054	17	484438	0.0467143	0.82074	PCCA	DOX17againstowncontroln2	0	9	1	5	0.666667
DOX17againstowncontroln2	PRDXDD1P	10	132054	17	484438	0.0467143	0.82074	PRDXDD1P	DOX17againstowncontroln2	3	0	7	0	1
DOX17againstowncontroln2	SHQ1	10	132054	17	484438	0.0467143	0.82074	SHQ1	DOX17againstowncontroln2	0	10	0	4	0.714286
DOX17againstowncontroln2	WDR47	10	132054	17	484438	0.0467143	0.82074	WDR47	DOX17againstowncontroln2	0	10	0	8	0.555556
DOX17againstowncontroln2	WDR20	119	132054	363	484438	0.0469978	0.824631	WDR20	DOX17againstowncontroln2	2	115	2	116	0.506383
DOX17againstowncontroln2	GLRB	17	132054	36	484438	0.0470816	0.825014	GLRB	DOX17againstowncontroln2	0	17	0	17	0.5
DOX17againstowncontroln2	PRKD1	66	132054	188	484438	0.0472935	0.827637	PRKD1	DOX17againstowncontroln2	0	66	0	51	0.564103
DOX17againstowncontroln2	C1RL	13	132054	25	484438	0.0476752	0.83322	C1RL	DOX17againstowncontroln2	1	9	3	11	0.541667
DOX17againstowncontroln2	KISS1R	18	132054	39	484438	0.048344	0.842693	KISS1R	DOX17againstowncontroln2	5	10	3	12	0.6
DOX17againstowncontroln2	TG	18	132054	39	484438	0.048344	0.842693	TG	DOX17againstowncontroln2	3	14	1	12	0.6
DOX17againstowncontroln2	ZNF827	34	132054	87	484438	0.0497743	0.866491	ZNF827	DOX17againstowncontroln2	0	33	1	33	0.507463
DOX17againstowncontroln2	SQSTM1	42	132054	112	484438	0.050221	0.868082	SQSTM1	DOX17againstowncontroln2	3	38	1	42	0.5
DOX17againstowncontroln2	EGFL6	14	132054	28	484438	0.0502574	0.868082	EGFL6	DOX17againstowncontroln2	0	14	0	7	0.666667
DOX17againstowncontroln2	PHF14	14	132054	28	484438	0.0502574	0.868082	PHF14	DOX17againstowncontroln2	3	10	1	3	0.823529
DOX17againstowncontroln2	RNASEK	14	132054	28	484438	0.0502574	0.868082	RNASEK	DOX17againstowncontroln2	7	5	2	4	0.777778
DOX17againstowncontroln2	TMEM101	14	132054	28	484438	0.0502574	0.868082	TMEM101	DOX17againstowncontroln2	2	9	3	6	0.7
DOX17againstowncontroln2	ZMYM5	14	132054	28	484438	0.0502574	0.868082	ZMYM5	DOX17againstowncontroln2	1	13	0	9	0.608696
DOX17againstowncontroln2	AARSD1	21	132054	48	484438	0.0507957	0.875108	AARSD1	DOX17againstowncontroln2	1	18	2	9	0.7
DOX17againstowncontroln2	CSRP3	21	132054	48	484438	0.0507957	0.875108	CSRP3	DOX17againstowncontroln2	3	16	2	13	0.617647
DOX17againstowncontroln2	MBLAC1	22	132054	51	484438	0.0512616	0.87555	MBLAC1	DOX17againstowncontroln2	13	0	9	2	0.916667
DOX17againstowncontroln2	C1orf156	11	132054	20	484438	0.0512797	0.87555	C1orf156	DOX17againstowncontroln2	1	5	5	7	0.611111
DOX17againstowncontroln2	NFATC4	11	132054	20	484438	0.0512797	0.87555	NFATC4	DOX17againstowncontroln2	3	5	3	6	0.647059
DOX17againstowncontroln2	NUDT19	11	132054	20	484438	0.0512797	0.87555	NUDT19	DOX17againstowncontroln2	2	7	2	7	0.611111
DOX17againstowncontroln2	SIGMAR1	11	132054	20	484438	0.0512797	0.87555	SIGMAR1	DOX17againstowncontroln2	4	3	4	5	0.6875
DOX17againstowncontroln2	AATF	52	132054	144	484438	0.0514391	0.87555	AATF	DOX17againstowncontroln2	0	51	1	41	0.55914
DOX17againstowncontroln2	PRR5-ARHGAP8	29	132054	72	484438	0.0514853	0.87555	PRR5-ARHGAP8	DOX17againstowncontroln2	0	29	0	8	0.783784
DOX17againstowncontroln2	RHBDD3	29	132054	72	484438	0.0514853	0.87555	RHBDD3	DOX17againstowncontroln2	2	17	10	22	0.568627
DOX17againstowncontroln2	MED26	28	132054	69	484438	0.0516899	0.87555	MED26	DOX17againstowncontroln2	0	28	0	12	0.7
DOX17againstowncontroln2	SETD1B	24	132054	57	484438	0.0517953	0.87555	SETD1B	DOX17againstowncontroln2	3	14	7	7	0.774194
DOX17againstowncontroln2	ALDH3A2	15	132054	31	484438	0.0523661	0.87555	ALDH3A2	DOX17againstowncontroln2	6	8	1	8	0.652174
DOX17againstowncontroln2	EFNB2	15	132054	31	484438	0.0523661	0.87555	EFNB2	DOX17againstowncontroln2	0	15	0	7	0.681818
DOX17againstowncontroln2	ARAP1	7	132054	10	484438	0.0526647	0.87555	ARAP1	DOX17againstowncontroln2	2	5	0	2	0.777778
DOX17againstowncontroln2	B9D2	7	132054	10	484438	0.0526647	0.87555	B9D2	DOX17againstowncontroln2	4	2	1	4	0.636364
DOX17againstowncontroln2	BIVM	7	132054	10	484438	0.0526647	0.87555	BIVM	DOX17againstowncontroln2	1	6	0	3	0.7
DOX17againstowncontroln2	C20orf111	7	132054	10	484438	0.0526647	0.87555	C20orf111	DOX17againstowncontroln2	0	7	0	0	1
DOX17againstowncontroln2	GUCA1C	7	132054	10	484438	0.0526647	0.87555	GUCA1C	DOX17againstowncontroln2	0	7	0	2	0.777778
DOX17againstowncontroln2	HABP4	7	132054	10	484438	0.0526647	0.87555	HABP4	DOX17againstowncontroln2	1	6	0	0	1
DOX17againstowncontroln2	HES4	7	132054	10	484438	0.0526647	0.87555	HES4	DOX17againstowncontroln2	2	2	3	2	0.777778
DOX17againstowncontroln2	LOC148189	7	132054	10	484438	0.0526647	0.87555	LOC148189	DOX17againstowncontroln2	4	3	0	0	1
DOX17againstowncontroln2	PABPC1L	7	132054	10	484438	0.0526647	0.87555	PABPC1L	DOX17againstowncontroln2	1	6	0	0	1
DOX17againstowncontroln2	TCTE3	7	132054	10	484438	0.0526647	0.87555	TCTE3	DOX17againstowncontroln2	0	6	1	2	0.777778
DOX17againstowncontroln2	TMC5	7	132054	10	484438	0.0526647	0.87555	TMC5	DOX17againstowncontroln2	0	7	0	1	0.875
DOX17againstowncontroln2	TMED1	7	132054	10	484438	0.0526647	0.87555	TMED1	DOX17againstowncontroln2	2	1	4	0	1
DOX17againstowncontroln2	TRIP13	7	132054	10	484438	0.0526647	0.87555	TRIP13	DOX17againstowncontroln2	1	6	0	3	0.7
DOX17againstowncontroln2	TTPA	7	132054	10	484438	0.0526647	0.87555	TTPA	DOX17againstowncontroln2	0	7	0	1	0.875
DOX17againstowncontroln2	ULK2	7	132054	10	484438	0.0526647	0.87555	ULK2	DOX17againstowncontroln2	1	3	3	2	0.777778
DOX17againstowncontroln2	ZNF226	7	132054	10	484438	0.0526647	0.87555	ZNF226	DOX17againstowncontroln2	0	3	4	2	0.777778
DOX17againstowncontroln2	SIPA1L1	37	132054	97	484438	0.0534432	0.879263	SIPA1L1	DOX17againstowncontroln2	1	36	0	31	0.544118
DOX17againstowncontroln2	FKBP11	9	132054	15	484438	0.0536152	0.879263	FKBP11	DOX17againstowncontroln2	1	3	5	2	0.818182
DOX17againstowncontroln2	KCTD6	9	132054	15	484438	0.0536152	0.879263	KCTD6	DOX17againstowncontroln2	0	9	0	7	0.5625
DOX17againstowncontroln2	LANCL2	9	132054	15	484438	0.0536152	0.879263	LANCL2	DOX17againstowncontroln2	0	9	0	6	0.6
DOX17againstowncontroln2	NMI	9	132054	15	484438	0.0536152	0.879263	NMI	DOX17againstowncontroln2	0	4	5	1	0.9
DOX17againstowncontroln2	PIGG	9	132054	15	484438	0.0536152	0.879263	PIGG	DOX17againstowncontroln2	1	8	0	1	0.9
DOX17againstowncontroln2	SLC44A4	9	132054	15	484438	0.0536152	0.879263	SLC44A4	DOX17againstowncontroln2	3	3	3	4	0.692308
DOX17againstowncontroln2	TCEA1	9	132054	15	484438	0.0536152	0.879263	TCEA1	DOX17againstowncontroln2	0	9	0	7	0.5625
DOX17againstowncontroln2	TOMM5	9	132054	15	484438	0.0536152	0.879263	TOMM5	DOX17againstowncontroln2	5	1	3	1	0.9
DOX17againstowncontroln2	ZBED4	9	132054	15	484438	0.0536152	0.879263	ZBED4	DOX17againstowncontroln2	0	9	0	8	0.529412
DOX17againstowncontroln2	ZNF787	9	132054	15	484438	0.0536152	0.879263	ZNF787	DOX17againstowncontroln2	0	9	0	5	0.642857
DOX17againstowncontroln2	TMEM189-UBE2V1	49	132054	135	484438	0.0539704	0.883998	TMEM189-UBE2V1	DOX17againstowncontroln2	0	48	1	48	0.505155
DOX17againstowncontroln2	UBTF	43	132054	116	484438	0.0542493	0.887473	UBTF	DOX17againstowncontroln2	4	32	7	43	0.5
DOX17againstowncontroln2	CUL4A	12	132054	23	484438	0.0549713	0.892516	CUL4A	DOX17againstowncontroln2	1	11	0	8	0.6
DOX17againstowncontroln2	FSTL4	12	132054	23	484438	0.0549713	0.892516	FSTL4	DOX17againstowncontroln2	0	12	0	14	0.461538
DOX17againstowncontroln2	PPP1R3F	12	132054	23	484438	0.0549713	0.892516	PPP1R3F	DOX17againstowncontroln2	6	2	4	5	0.705882
DOX17againstowncontroln2	PRCP	12	132054	23	484438	0.0549713	0.892516	PRCP	DOX17againstowncontroln2	1	11	0	13	0.48
DOX17againstowncontroln2	TMEM129	12	132054	23	484438	0.0549713	0.892516	TMEM129	DOX17againstowncontroln2	3	4	5	7	0.631579
DOX17againstowncontroln2	VASP	12	132054	23	484438	0.0549713	0.892516	VASP	DOX17againstowncontroln2	1	9	2	4	0.75
DOX17againstowncontroln2	LRRTM3	42	132054	113	484438	0.0550273	0.892516	LRRTM3	DOX17againstowncontroln2	17	10	15	17	0.711864
DOX17againstowncontroln2	MAN2A1	34	132054	88	484438	0.0552276	0.894674	MAN2A1	DOX17againstowncontroln2	2	31	1	22	0.607143
DOX17againstowncontroln2	C17orf90	17	132054	37	484438	0.0554402	0.894847	C17orf90	DOX17againstowncontroln2	4	12	1	15	0.53125
DOX17againstowncontroln2	CTF1	17	132054	37	484438	0.0554402	0.894847	CTF1	DOX17againstowncontroln2	5	8	4	3	0.85
DOX17againstowncontroln2	PSMG2	17	132054	37	484438	0.0554402	0.894847	PSMG2	DOX17againstowncontroln2	2	11	4	7	0.708333
DOX17againstowncontroln2	NRXN1	169	132054	536	484438	0.0557545	0.898165	NRXN1	DOX17againstowncontroln2	0	169	0	144	0.539936
DOX17againstowncontroln2	PRICKLE1	33	132054	85	484438	0.0557808	0.898165	PRICKLE1	DOX17againstowncontroln2	0	32	1	31	0.515625
DOX17againstowncontroln2	BAHCC1	32	132054	82	484438	0.0563067	0.905538	BAHCC1	DOX17againstowncontroln2	2	30	0	21	0.603774
DOX17againstowncontroln2	HNRNPUL1	46	132054	126	484438	0.0565816	0.907114	HNRNPUL1	DOX17againstowncontroln2	3	33	10	36	0.560976
DOX17againstowncontroln2	B3GAT3	19	132054	43	484438	0.0573445	0.907114	B3GAT3	DOX17againstowncontroln2	1	18	0	7	0.730769
DOX17againstowncontroln2	TRIM8	19	132054	43	484438	0.0573445	0.907114	TRIM8	DOX17againstowncontroln2	9	7	3	6	0.76
DOX17againstowncontroln2	C3orf67	29	132054	73	484438	0.0576731	0.907114	C3orf67	DOX17againstowncontroln2	2	25	2	16	0.644444
DOX17againstowncontroln2	MIAT	29	132054	73	484438	0.0576731	0.907114	MIAT	DOX17againstowncontroln2	11	14	4	8	0.783784
DOX17againstowncontroln2	C14orf128	13	132054	26	484438	0.0579411	0.907114	C14orf128	DOX17againstowncontroln2	8	0	5	0	1
DOX17againstowncontroln2	FAM81A	13	132054	26	484438	0.0579411	0.907114	FAM81A	DOX17againstowncontroln2	0	12	1	6	0.684211
DOX17againstowncontroln2	LOC728723	13	132054	26	484438	0.0579411	0.907114	LOC728723	DOX17againstowncontroln2	0	9	4	3	0.8125
DOX17againstowncontroln2	MKKS	13	132054	26	484438	0.0579411	0.907114	MKKS	DOX17againstowncontroln2	0	12	1	6	0.684211
DOX17againstowncontroln2	ZNF740	13	132054	26	484438	0.0579411	0.907114	ZNF740	DOX17againstowncontroln2	6	1	6	5	0.722222
DOX17againstowncontroln2	LRRTM4	28	132054	70	484438	0.0580383	0.907114	LRRTM4	DOX17againstowncontroln2	0	27	1	13	0.682927
DOX17againstowncontroln2	MTHFD1	28	132054	70	484438	0.0580383	0.907114	MTHFD1	DOX17againstowncontroln2	2	25	1	18	0.608696
DOX17againstowncontroln2	KIAA0101	27	132054	67	484438	0.0583464	0.907114	KIAA0101	DOX17againstowncontroln2	5	16	6	23	0.54
DOX17againstowncontroln2	TNRC6B	118	132054	364	484438	0.0585318	0.907114	TNRC6B	DOX17againstowncontroln2	1	113	4	92	0.561905
DOX17againstowncontroln2	PIGP	26	132054	64	484438	0.0585886	0.907114	PIGP	DOX17againstowncontroln2	10	13	3	16	0.619048
DOX17againstowncontroln2	VPS28	22	132054	52	484438	0.0586692	0.907114	VPS28	DOX17againstowncontroln2	0	22	0	13	0.628571
DOX17againstowncontroln2	DNAJC27	23	132054	55	484438	0.0588096	0.907114	DNAJC27	DOX17againstowncontroln2	6	9	8	9	0.71875
DOX17againstowncontroln2	ZNF689	23	132054	55	484438	0.0588096	0.907114	ZNF689	DOX17againstowncontroln2	7	13	3	6	0.793103
DOX17againstowncontroln2	PABPN1	24	132054	58	484438	0.0588328	0.907114	PABPN1	DOX17againstowncontroln2	9	5	10	5	0.827586
DOX17againstowncontroln2	ACBD3	6	132054	8	484438	0.0590974	0.907114	ACBD3	DOX17againstowncontroln2	0	6	0	2	0.75
DOX17againstowncontroln2	AMDHD2	6	132054	8	484438	0.0590974	0.907114	AMDHD2	DOX17againstowncontroln2	3	1	2	0	1
DOX17againstowncontroln2	C20orf96	6	132054	8	484438	0.0590974	0.907114	C20orf96	DOX17againstowncontroln2	0	6	0	3	0.666667
DOX17againstowncontroln2	CAST	6	132054	8	484438	0.0590974	0.907114	CAST	DOX17againstowncontroln2	0	6	0	4	0.6
DOX17againstowncontroln2	LRRC33	6	132054	8	484438	0.0590974	0.907114	LRRC33	DOX17againstowncontroln2	0	6	0	0	1
DOX17againstowncontroln2	MFAP2	6	132054	8	484438	0.0590974	0.907114	MFAP2	DOX17againstowncontroln2	0	6	0	5	0.545455
DOX17againstowncontroln2	NAF1	6	132054	8	484438	0.0590974	0.907114	NAF1	DOX17againstowncontroln2	0	3	3	1	0.857143
DOX17againstowncontroln2	PRSS16	6	132054	8	484438	0.0590974	0.907114	PRSS16	DOX17againstowncontroln2	1	5	0	3	0.666667
DOX17againstowncontroln2	SCYL3	6	132054	8	484438	0.0590974	0.907114	SCYL3	DOX17againstowncontroln2	0	6	0	2	0.75
DOX17againstowncontroln2	SETMAR	6	132054	8	484438	0.0590974	0.907114	SETMAR	DOX17againstowncontroln2	1	5	0	2	0.75
DOX17againstowncontroln2	SHPK	6	132054	8	484438	0.0590974	0.907114	SHPK	DOX17againstowncontroln2	0	5	1	0	1
DOX17againstowncontroln2	SLC27A4	6	132054	8	484438	0.0590974	0.907114	SLC27A4	DOX17againstowncontroln2	1	5	0	5	0.545455
DOX17againstowncontroln2	TRIM4	6	132054	8	484438	0.0590974	0.907114	TRIM4	DOX17againstowncontroln2	3	2	1	4	0.6
DOX17againstowncontroln2	TTLL6	6	132054	8	484438	0.0590974	0.907114	TTLL6	DOX17againstowncontroln2	0	4	2	3	0.666667
DOX17againstowncontroln2	VPS26B	6	132054	8	484438	0.0590974	0.907114	VPS26B	DOX17againstowncontroln2	1	3	2	0	1
DOX17againstowncontroln2	ZBTB26	6	132054	8	484438	0.0590974	0.907114	ZBTB26	DOX17againstowncontroln2	0	5	1	4	0.6
DOX17againstowncontroln2	C4orf38	10	132054	18	484438	0.0591522	0.907114	C4orf38	DOX17againstowncontroln2	3	0	7	0	1
DOX17againstowncontroln2	ELAVL1	10	132054	18	484438	0.0591522	0.907114	ELAVL1	DOX17againstowncontroln2	0	10	0	3	0.769231
DOX17againstowncontroln2	SOX2	10	132054	18	484438	0.0591522	0.907114	SOX2	DOX17againstowncontroln2	7	0	3	0	1
DOX17againstowncontroln2	TM2D1	10	132054	18	484438	0.0591522	0.907114	TM2D1	DOX17againstowncontroln2	4	5	1	2	0.833333
DOX17againstowncontroln2	TMEM161B	10	132054	18	484438	0.0591522	0.907114	TMEM161B	DOX17againstowncontroln2	0	9	1	7	0.588235
DOX17againstowncontroln2	DHTKD1	14	132054	29	484438	0.060314	0.907114	DHTKD1	DOX17againstowncontroln2	0	12	2	10	0.583333
DOX17againstowncontroln2	MCFD2	14	132054	29	484438	0.060314	0.907114	MCFD2	DOX17againstowncontroln2	1	12	1	10	0.583333
DOX17againstowncontroln2	OVCA2	14	132054	29	484438	0.060314	0.907114	OVCA2	DOX17againstowncontroln2	6	3	5	2	0.875
DOX17againstowncontroln2	TMPRSS15	14	132054	29	484438	0.060314	0.907114	TMPRSS15	DOX17againstowncontroln2	0	14	0	7	0.666667
DOX17againstowncontroln2	GALK2	47	132054	130	484438	0.0605387	0.907114	GALK2	DOX17againstowncontroln2	0	45	2	36	0.566265
DOX17againstowncontroln2	CCDC91	113	132054	348	484438	0.0610163	0.907114	CCDC91	DOX17againstowncontroln2	0	113	0	89	0.559406
DOX17againstowncontroln2	MIR548C	34	132054	89	484438	0.0611016	0.907114	MIR548C	DOX17againstowncontroln2	0	34	0	23	0.596491
DOX17againstowncontroln2	ACBD4	8	132054	13	484438	0.0615732	0.907114	ACBD4	DOX17againstowncontroln2	2	5	1	2	0.8
DOX17againstowncontroln2	ACD	8	132054	13	484438	0.0615732	0.907114	ACD	DOX17againstowncontroln2	4	1	3	0	1
DOX17againstowncontroln2	C19orf60	8	132054	13	484438	0.0615732	0.907114	C19orf60	DOX17againstowncontroln2	3	5	0	3	0.727273
DOX17againstowncontroln2	CASP2	8	132054	13	484438	0.0615732	0.907114	CASP2	DOX17againstowncontroln2	0	8	0	4	0.666667
DOX17againstowncontroln2	DCP2	8	132054	13	484438	0.0615732	0.907114	DCP2	DOX17againstowncontroln2	0	8	0	5	0.615385
DOX17againstowncontroln2	EGF	8	132054	13	484438	0.0615732	0.907114	EGF	DOX17againstowncontroln2	3	3	2	6	0.571429
DOX17againstowncontroln2	MEX3A	8	132054	13	484438	0.0615732	0.907114	MEX3A	DOX17againstowncontroln2	0	5	3	1	0.888889
DOX17againstowncontroln2	MGC16275	8	132054	13	484438	0.0615732	0.907114	MGC16275	DOX17againstowncontroln2	1	1	6	1	0.888889
DOX17againstowncontroln2	NPM3	8	132054	13	484438	0.0615732	0.907114	NPM3	DOX17againstowncontroln2	0	6	2	6	0.571429
DOX17againstowncontroln2	OCEL1	8	132054	13	484438	0.0615732	0.907114	OCEL1	DOX17againstowncontroln2	2	4	2	1	0.888889
DOX17againstowncontroln2	PAX8	8	132054	13	484438	0.0615732	0.907114	PAX8	DOX17againstowncontroln2	1	6	1	4	0.666667
DOX17againstowncontroln2	SGTA	8	132054	13	484438	0.0615732	0.907114	SGTA	DOX17againstowncontroln2	0	8	0	7	0.533333
DOX17againstowncontroln2	ZNF414	8	132054	13	484438	0.0615732	0.907114	ZNF414	DOX17againstowncontroln2	2	3	3	1	0.888889
DOX17againstowncontroln2	CCDC142	15	132054	32	484438	0.0621913	0.907114	CCDC142	DOX17againstowncontroln2	5	0	10	0	1
DOX17againstowncontroln2	HMG20A	54	132054	153	484438	0.0628296	0.907114	HMG20A	DOX17againstowncontroln2	1	46	7	29	0.650602
DOX17againstowncontroln2	CHIC1	39	132054	105	484438	0.062892	0.907114	CHIC1	DOX17againstowncontroln2	7	21	11	18	0.684211
DOX17againstowncontroln2	LIMCH1	100	132054	305	484438	0.0631534	0.907114	LIMCH1	DOX17againstowncontroln2	3	93	4	71	0.584795
DOX17againstowncontroln2	AP3B1	31	132054	80	484438	0.0631547	0.907114	AP3B1	DOX17againstowncontroln2	0	30	1	24	0.563636
DOX17againstowncontroln2	RNGTT	31	132054	80	484438	0.0631547	0.907114	RNGTT	DOX17againstowncontroln2	0	28	3	18	0.632653
DOX17againstowncontroln2	ASF1B	11	132054	21	484438	0.0635128	0.907114	ASF1B	DOX17againstowncontroln2	1	7	3	5	0.6875
DOX17againstowncontroln2	CECR5	11	132054	21	484438	0.0635128	0.907114	CECR5	DOX17againstowncontroln2	0	11	0	8	0.578947
DOX17againstowncontroln2	CLK2	11	132054	21	484438	0.0635128	0.907114	CLK2	DOX17againstowncontroln2	0	11	0	9	0.55
DOX17againstowncontroln2	LYN	11	132054	21	484438	0.0635128	0.907114	LYN	DOX17againstowncontroln2	0	11	0	4	0.733333
DOX17againstowncontroln2	PDLIM2	11	132054	21	484438	0.0635128	0.907114	PDLIM2	DOX17againstowncontroln2	3	3	5	0	1
DOX17againstowncontroln2	RIMBP2	11	132054	21	484438	0.0635128	0.907114	RIMBP2	DOX17againstowncontroln2	5	0	6	0	1
DOX17againstowncontroln2	THAP11	11	132054	21	484438	0.0635128	0.907114	THAP11	DOX17againstowncontroln2	4	0	7	0	1
DOX17againstowncontroln2	SNX17	16	132054	35	484438	0.0636555	0.907114	SNX17	DOX17againstowncontroln2	4	9	3	4	0.8
DOX17againstowncontroln2	DLG3	38	132054	102	484438	0.0638036	0.907114	DLG3	DOX17againstowncontroln2	1	36	1	26	0.59375
DOX17againstowncontroln2	ITFG1	48	132054	134	484438	0.0645621	0.907114	ITFG1	DOX17againstowncontroln2	1	47	0	27	0.64
DOX17againstowncontroln2	KIAA1598	37	132054	99	484438	0.0647134	0.907114	KIAA1598	DOX17againstowncontroln2	0	37	0	28	0.569231
DOX17againstowncontroln2	C16orf55	17	132054	38	484438	0.0647737	0.907114	C16orf55	DOX17againstowncontroln2	4	11	2	7	0.708333
DOX17againstowncontroln2	TMX2	17	132054	38	484438	0.0647737	0.907114	TMX2	DOX17againstowncontroln2	1	11	5	2	0.894737
DOX17againstowncontroln2	ARFIP1	5	132054	6	484438	0.0654143	0.907114	ARFIP1	DOX17againstowncontroln2	0	5	0	1	0.833333
DOX17againstowncontroln2	B4GALNT1	5	132054	6	484438	0.0654143	0.907114	B4GALNT1	DOX17againstowncontroln2	3	1	1	1	0.833333
DOX17againstowncontroln2	CD151	5	132054	6	484438	0.0654143	0.907114	CD151	DOX17againstowncontroln2	0	5	0	1	0.833333
DOX17againstowncontroln2	CDH19	5	132054	6	484438	0.0654143	0.907114	CDH19	DOX17againstowncontroln2	0	5	0	2	0.714286
DOX17againstowncontroln2	CNRIP1	5	132054	6	484438	0.0654143	0.907114	CNRIP1	DOX17againstowncontroln2	1	4	0	2	0.714286
DOX17againstowncontroln2	CXXC4	5	132054	6	484438	0.0654143	0.907114	CXXC4	DOX17againstowncontroln2	2	3	0	1	0.833333
DOX17againstowncontroln2	DOCK6	5	132054	6	484438	0.0654143	0.907114	DOCK6	DOX17againstowncontroln2	0	5	0	1	0.833333
DOX17againstowncontroln2	FAM178A	5	132054	6	484438	0.0654143	0.907114	FAM178A	DOX17againstowncontroln2	3	1	1	3	0.625
DOX17againstowncontroln2	GPRC5C	5	132054	6	484438	0.0654143	0.907114	GPRC5C	DOX17againstowncontroln2	3	2	0	0	1
DOX17againstowncontroln2	HEATR3	5	132054	6	484438	0.0654143	0.907114	HEATR3	DOX17againstowncontroln2	1	4	0	2	0.714286
DOX17againstowncontroln2	LOC93622	5	132054	6	484438	0.0654143	0.907114	LOC93622	DOX17againstowncontroln2	2	1	2	0	1
DOX17againstowncontroln2	MLF2	5	132054	6	484438	0.0654143	0.907114	MLF2	DOX17againstowncontroln2	3	0	2	2	0.714286
DOX17againstowncontroln2	MOGS	5	132054	6	484438	0.0654143	0.907114	MOGS	DOX17againstowncontroln2	1	2	2	4	0.555556
DOX17againstowncontroln2	PIGM	5	132054	6	484438	0.0654143	0.907114	PIGM	DOX17againstowncontroln2	5	0	0	0	1
DOX17againstowncontroln2	SCRN2	5	132054	6	484438	0.0654143	0.907114	SCRN2	DOX17againstowncontroln2	2	3	0	2	0.714286
DOX17againstowncontroln2	SIM1	5	132054	6	484438	0.0654143	0.907114	SIM1	DOX17againstowncontroln2	0	5	0	0	1
DOX17againstowncontroln2	SLC26A11	5	132054	6	484438	0.0654143	0.907114	SLC26A11	DOX17againstowncontroln2	0	3	2	0	1
DOX17againstowncontroln2	SLC8A2	5	132054	6	484438	0.0654143	0.907114	SLC8A2	DOX17againstowncontroln2	2	2	1	2	0.714286
DOX17againstowncontroln2	TARSL2	5	132054	6	484438	0.0654143	0.907114	TARSL2	DOX17againstowncontroln2	1	1	3	1	0.833333
DOX17againstowncontroln2	TRAF5	5	132054	6	484438	0.0654143	0.907114	TRAF5	DOX17againstowncontroln2	0	5	0	0	1
DOX17againstowncontroln2	TRUB1	5	132054	6	484438	0.0654143	0.907114	TRUB1	DOX17againstowncontroln2	1	4	0	3	0.625
DOX17againstowncontroln2	UFSP1	5	132054	6	484438	0.0654143	0.907114	UFSP1	DOX17againstowncontroln2	2	0	3	0	1
DOX17againstowncontroln2	WDFY1	5	132054	6	484438	0.0654143	0.907114	WDFY1	DOX17againstowncontroln2	0	5	0	3	0.625
DOX17againstowncontroln2	ZRANB2	5	132054	6	484438	0.0654143	0.907114	ZRANB2	DOX17againstowncontroln2	0	5	0	2	0.714286
DOX17againstowncontroln2	CD69	18	132054	41	484438	0.0656008	0.907114	CD69	DOX17againstowncontroln2	5	5	8	1	0.947368
DOX17againstowncontroln2	PRRG2	18	132054	41	484438	0.0656008	0.907114	PRRG2	DOX17againstowncontroln2	6	0	12	5	0.782609
DOX17againstowncontroln2	MSI2	95	132054	289	484438	0.0657214	0.907114	MSI2	DOX17againstowncontroln2	3	90	2	74	0.56213
DOX17againstowncontroln2	SCFD1	19	132054	44	484438	0.0661823	0.907114	SCFD1	DOX17againstowncontroln2	0	19	0	10	0.655172
DOX17againstowncontroln2	C17orf91	25	132054	62	484438	0.06623	0.907114	C17orf91	DOX17againstowncontroln2	10	12	3	8	0.757576
DOX17againstowncontroln2	EXTL3	25	132054	62	484438	0.06623	0.907114	EXTL3	DOX17againstowncontroln2	0	25	0	29	0.462963
DOX17againstowncontroln2	NINJ2	55	132054	157	484438	0.0664624	0.907114	NINJ2	DOX17againstowncontroln2	0	55	0	35	0.611111
DOX17againstowncontroln2	AES	20	132054	47	484438	0.0665554	0.907114	AES	DOX17againstowncontroln2	4	10	6	11	0.645161
DOX17againstowncontroln2	MSI1	20	132054	47	484438	0.0665554	0.907114	MSI1	DOX17againstowncontroln2	2	18	0	20	0.5
DOX17againstowncontroln2	NR2F6	20	132054	47	484438	0.0665554	0.907114	NR2F6	DOX17againstowncontroln2	5	13	2	11	0.645161
DOX17againstowncontroln2	YPEL3	23	132054	56	484438	0.0667127	0.907114	YPEL3	DOX17againstowncontroln2	8	10	5	6	0.793103
DOX17againstowncontroln2	FAM13C	22	132054	53	484438	0.0667965	0.907114	FAM13C	DOX17againstowncontroln2	2	16	4	13	0.628571
DOX17againstowncontroln2	AFP	12	132054	24	484438	0.0669319	0.907114	AFP	DOX17againstowncontroln2	1	9	2	6	0.666667
DOX17againstowncontroln2	CEP170	12	132054	24	484438	0.0669319	0.907114	CEP170	DOX17againstowncontroln2	1	10	1	11	0.521739
DOX17againstowncontroln2	KIAA0100	12	132054	24	484438	0.0669319	0.907114	KIAA0100	DOX17againstowncontroln2	2	8	2	2	0.857143
DOX17againstowncontroln2	OTUD5	12	132054	24	484438	0.0669319	0.907114	OTUD5	DOX17againstowncontroln2	0	10	2	10	0.545455
DOX17againstowncontroln2	RNF144A	12	132054	24	484438	0.0669319	0.907114	RNF144A	DOX17againstowncontroln2	1	10	1	7	0.631579
DOX17againstowncontroln2	TRIP6	12	132054	24	484438	0.0669319	0.907114	TRIP6	DOX17againstowncontroln2	1	6	5	4	0.75
DOX17againstowncontroln2	XKR3	12	132054	24	484438	0.0669319	0.907114	XKR3	DOX17againstowncontroln2	0	10	2	10	0.545455
DOX17againstowncontroln2	ADORA2B	9	132054	16	484438	0.0683716	0.907114	ADORA2B	DOX17againstowncontroln2	0	5	4	5	0.642857
DOX17againstowncontroln2	BUD31	9	132054	16	484438	0.0683716	0.907114	BUD31	DOX17againstowncontroln2	2	4	3	3	0.75
DOX17againstowncontroln2	CCDC149	9	132054	16	484438	0.0683716	0.907114	CCDC149	DOX17againstowncontroln2	0	9	0	7	0.5625
DOX17againstowncontroln2	DHX57	9	132054	16	484438	0.0683716	0.907114	DHX57	DOX17againstowncontroln2	2	7	0	2	0.818182
DOX17againstowncontroln2	ESYT1	9	132054	16	484438	0.0683716	0.907114	ESYT1	DOX17againstowncontroln2	1	5	3	4	0.692308
DOX17againstowncontroln2	MAP3K15	9	132054	16	484438	0.0683716	0.907114	MAP3K15	DOX17againstowncontroln2	0	9	0	5	0.642857
DOX17againstowncontroln2	PLIN1	9	132054	16	484438	0.0683716	0.907114	PLIN1	DOX17againstowncontroln2	2	0	7	2	0.818182
DOX17againstowncontroln2	PRMT8	9	132054	16	484438	0.0683716	0.907114	PRMT8	DOX17againstowncontroln2	0	9	0	7	0.5625
DOX17againstowncontroln2	PTPRU	9	132054	16	484438	0.0683716	0.907114	PTPRU	DOX17againstowncontroln2	0	9	0	4	0.692308
DOX17againstowncontroln2	RAB1A	9	132054	16	484438	0.0683716	0.907114	RAB1A	DOX17againstowncontroln2	2	7	0	2	0.818182
DOX17againstowncontroln2	RUNDC3B	9	132054	16	484438	0.0683716	0.907114	RUNDC3B	DOX17againstowncontroln2	0	9	0	7	0.5625
DOX17againstowncontroln2	SLC25A44	9	132054	16	484438	0.0683716	0.907114	SLC25A44	DOX17againstowncontroln2	4	2	3	2	0.818182
DOX17againstowncontroln2	SNHG12	9	132054	16	484438	0.0683716	0.907114	SNHG12	DOX17againstowncontroln2	2	7	0	4	0.692308
DOX17againstowncontroln2	TIFA	9	132054	16	484438	0.0683716	0.907114	TIFA	DOX17againstowncontroln2	1	7	1	5	0.642857
DOX17againstowncontroln2	TIMM13	9	132054	16	484438	0.0683716	0.907114	TIMM13	DOX17againstowncontroln2	7	0	2	1	0.9
DOX17againstowncontroln2	TNNI3	9	132054	16	484438	0.0683716	0.907114	TNNI3	DOX17againstowncontroln2	1	7	1	5	0.642857
DOX17againstowncontroln2	TTC18	9	132054	16	484438	0.0683716	0.907114	TTC18	DOX17againstowncontroln2	0	9	0	2	0.818182
DOX17againstowncontroln2	XRRA1	9	132054	16	484438	0.0683716	0.907114	XRRA1	DOX17againstowncontroln2	0	9	0	2	0.818182
DOX17againstowncontroln2	ABAT	3	132054	2	484438	0.0694109	0.907114	ABAT	DOX17againstowncontroln2	0	3	0	1	0.75
DOX17againstowncontroln2	ADCY1	3	132054	2	484438	0.0694109	0.907114	ADCY1	DOX17againstowncontroln2	1	1	1	0	1
DOX17againstowncontroln2	APOC1P1	3	132054	2	484438	0.0694109	0.907114	APOC1P1	DOX17againstowncontroln2	2	1	0	0	1
DOX17againstowncontroln2	ARHGAP33	3	132054	2	484438	0.0694109	0.907114	ARHGAP33	DOX17againstowncontroln2	1	2	0	2	0.6
DOX17againstowncontroln2	ATP6V1G1	3	132054	2	484438	0.0694109	0.907114	ATP6V1G1	DOX17againstowncontroln2	0	3	0	1	0.75
DOX17againstowncontroln2	BOD1	3	132054	2	484438	0.0694109	0.907114	BOD1	DOX17againstowncontroln2	1	0	2	4	0.428571
DOX17againstowncontroln2	C8orf46	3	132054	2	484438	0.0694109	0.907114	C8orf46	DOX17againstowncontroln2	0	3	0	1	0.75
DOX17againstowncontroln2	CKB	3	132054	2	484438	0.0694109	0.907114	CKB	DOX17againstowncontroln2	1	1	1	0	1
DOX17againstowncontroln2	EGR1	3	132054	2	484438	0.0694109	0.907114	EGR1	DOX17againstowncontroln2	1	1	1	0	1
DOX17againstowncontroln2	FAM98C	3	132054	2	484438	0.0694109	0.907114	FAM98C	DOX17againstowncontroln2	0	3	0	0	1
DOX17againstowncontroln2	GEM	3	132054	2	484438	0.0694109	0.907114	GEM	DOX17againstowncontroln2	1	2	0	1	0.75
DOX17againstowncontroln2	GPR133	3	132054	2	484438	0.0694109	0.907114	GPR133	DOX17againstowncontroln2	0	2	1	0	1
DOX17againstowncontroln2	IRAK1BP1	3	132054	2	484438	0.0694109	0.907114	IRAK1BP1	DOX17againstowncontroln2	0	3	0	2	0.6
DOX17againstowncontroln2	JAK1	3	132054	2	484438	0.0694109	0.907114	JAK1	DOX17againstowncontroln2	0	3	0	3	0.5
DOX17againstowncontroln2	KCTD11	3	132054	2	484438	0.0694109	0.907114	KCTD11	DOX17againstowncontroln2	2	0	1	0	1
DOX17againstowncontroln2	KLF11	3	132054	2	484438	0.0694109	0.907114	KLF11	DOX17againstowncontroln2	1	2	0	0	1
DOX17againstowncontroln2	LOC100268168	3	132054	2	484438	0.0694109	0.907114	LOC100268168	DOX17againstowncontroln2	2	0	1	0	1
DOX17againstowncontroln2	MATN4	3	132054	2	484438	0.0694109	0.907114	MATN4	DOX17againstowncontroln2	1	0	2	0	1
DOX17againstowncontroln2	NCRNA00242	3	132054	2	484438	0.0694109	0.907114	NCRNA00242	DOX17againstowncontroln2	0	0	3	0	1
DOX17againstowncontroln2	NLRP1	3	132054	2	484438	0.0694109	0.907114	NLRP1	DOX17againstowncontroln2	1	2	0	1	0.75
DOX17againstowncontroln2	NPHS1	3	132054	2	484438	0.0694109	0.907114	NPHS1	DOX17againstowncontroln2	0	2	1	0	1
DOX17againstowncontroln2	OCIAD2	3	132054	2	484438	0.0694109	0.907114	OCIAD2	DOX17againstowncontroln2	0	2	1	2	0.6
DOX17againstowncontroln2	POU3F2	3	132054	2	484438	0.0694109	0.907114	POU3F2	DOX17againstowncontroln2	2	0	1	0	1
DOX17againstowncontroln2	RAB3IP	3	132054	2	484438	0.0694109	0.907114	RAB3IP	DOX17againstowncontroln2	1	2	0	0	1
DOX17againstowncontroln2	RAB7L1	3	132054	2	484438	0.0694109	0.907114	RAB7L1	DOX17againstowncontroln2	1	2	0	0	1
DOX17againstowncontroln2	RPF1	3	132054	2	484438	0.0694109	0.907114	RPF1	DOX17againstowncontroln2	0	3	0	3	0.5
DOX17againstowncontroln2	SLC16A7	3	132054	2	484438	0.0694109	0.907114	SLC16A7	DOX17againstowncontroln2	0	3	0	0	1
DOX17againstowncontroln2	SNX18	3	132054	2	484438	0.0694109	0.907114	SNX18	DOX17againstowncontroln2	1	1	1	0	1
DOX17againstowncontroln2	STX7	3	132054	2	484438	0.0694109	0.907114	STX7	DOX17againstowncontroln2	0	3	0	1	0.75
DOX17againstowncontroln2	TPRA1	3	132054	2	484438	0.0694109	0.907114	TPRA1	DOX17againstowncontroln2	1	2	0	3	0.5
DOX17againstowncontroln2	TPT1	3	132054	2	484438	0.0694109	0.907114	TPT1	DOX17againstowncontroln2	0	3	0	1	0.75
DOX17againstowncontroln2	TTC30A	3	132054	2	484438	0.0694109	0.907114	TTC30A	DOX17againstowncontroln2	1	0	2	0	1
DOX17againstowncontroln2	ZNF222	3	132054	2	484438	0.0694109	0.907114	ZNF222	DOX17againstowncontroln2	0	3	0	1	0.75
DOX17againstowncontroln2	ZNF552	3	132054	2	484438	0.0694109	0.907114	ZNF552	DOX17againstowncontroln2	2	1	0	2	0.6
DOX17againstowncontroln2	LOC100134368	13	132054	27	484438	0.0695933	0.907114	LOC100134368	DOX17againstowncontroln2	1	11	1	4	0.764706
DOX17againstowncontroln2	PROX1	13	132054	27	484438	0.0695933	0.907114	PROX1	DOX17againstowncontroln2	0	12	1	6	0.684211
DOX17againstowncontroln2	TNKS2	13	132054	27	484438	0.0695933	0.907114	TNKS2	DOX17againstowncontroln2	2	8	3	4	0.764706
DOX17againstowncontroln2	C5orf55	4	132054	4	484438	0.0702473	0.907114	C5orf55	DOX17againstowncontroln2	0	0	4	0	1
DOX17againstowncontroln2	CBLN3	4	132054	4	484438	0.0702473	0.907114	CBLN3	DOX17againstowncontroln2	1	0	3	0	1
DOX17againstowncontroln2	CD109	4	132054	4	484438	0.0702473	0.907114	CD109	DOX17againstowncontroln2	0	1	3	3	0.571429
DOX17againstowncontroln2	DNAJC21	4	132054	4	484438	0.0702473	0.907114	DNAJC21	DOX17againstowncontroln2	0	4	0	2	0.666667
DOX17againstowncontroln2	EMR4P	4	132054	4	484438	0.0702473	0.907114	EMR4P	DOX17againstowncontroln2	1	3	0	1	0.8
DOX17againstowncontroln2	FADD	4	132054	4	484438	0.0702473	0.907114	FADD	DOX17againstowncontroln2	0	1	3	1	0.8
DOX17againstowncontroln2	FBXL6	4	132054	4	484438	0.0702473	0.907114	FBXL6	DOX17againstowncontroln2	0	2	2	0	1
DOX17againstowncontroln2	GLTP	4	132054	4	484438	0.0702473	0.907114	GLTP	DOX17againstowncontroln2	1	3	0	2	0.666667
DOX17againstowncontroln2	KIAA0494	4	132054	4	484438	0.0702473	0.907114	KIAA0494	DOX17againstowncontroln2	2	1	1	0	1
DOX17againstowncontroln2	MGMT	4	132054	4	484438	0.0702473	0.907114	MGMT	DOX17againstowncontroln2	0	4	0	1	0.8
DOX17againstowncontroln2	NCRNA00029	4	132054	4	484438	0.0702473	0.907114	NCRNA00029	DOX17againstowncontroln2	2	1	1	0	1
DOX17againstowncontroln2	PARP8	4	132054	4	484438	0.0702473	0.907114	PARP8	DOX17againstowncontroln2	0	3	1	4	0.5
DOX17againstowncontroln2	PHLDA3	4	132054	4	484438	0.0702473	0.907114	PHLDA3	DOX17againstowncontroln2	0	2	2	1	0.8
DOX17againstowncontroln2	PIKFYVE	4	132054	4	484438	0.0702473	0.907114	PIKFYVE	DOX17againstowncontroln2	3	1	0	2	0.666667
DOX17againstowncontroln2	RFESD	4	132054	4	484438	0.0702473	0.907114	RFESD	DOX17againstowncontroln2	3	0	1	1	0.8
DOX17againstowncontroln2	SNORD46	4	132054	4	484438	0.0702473	0.907114	SNORD46	DOX17againstowncontroln2	1	0	3	0	1
DOX17againstowncontroln2	SOX4	4	132054	4	484438	0.0702473	0.907114	SOX4	DOX17againstowncontroln2	1	0	3	0	1
DOX17againstowncontroln2	STEAP4	4	132054	4	484438	0.0702473	0.907114	STEAP4	DOX17againstowncontroln2	2	1	1	0	1
DOX17againstowncontroln2	SUGT1L1	4	132054	4	484438	0.0702473	0.907114	SUGT1L1	DOX17againstowncontroln2	0	2	2	3	0.571429
DOX17againstowncontroln2	TOB1	4	132054	4	484438	0.0702473	0.907114	TOB1	DOX17againstowncontroln2	1	0	3	0	1
DOX17againstowncontroln2	AGPS	136	132054	429	484438	0.0704113	0.907114	AGPS	DOX17againstowncontroln2	29	70	37	68	0.666667
DOX17againstowncontroln2	D2HGDH	7	132054	11	484438	0.0707276	0.907114	D2HGDH	DOX17againstowncontroln2	3	3	1	4	0.636364
DOX17againstowncontroln2	DSCR9	7	132054	11	484438	0.0707276	0.907114	DSCR9	DOX17againstowncontroln2	2	1	4	1	0.875
DOX17againstowncontroln2	E2F4	7	132054	11	484438	0.0707276	0.907114	E2F4	DOX17againstowncontroln2	1	5	1	2	0.777778
DOX17againstowncontroln2	FTSJ3	7	132054	11	484438	0.0707276	0.907114	FTSJ3	DOX17againstowncontroln2	3	3	1	1	0.875
DOX17againstowncontroln2	GGCT	7	132054	11	484438	0.0707276	0.907114	GGCT	DOX17againstowncontroln2	2	4	1	2	0.777778
DOX17againstowncontroln2	LOC100272217	7	132054	11	484438	0.0707276	0.907114	LOC100272217	DOX17againstowncontroln2	5	0	2	0	1
DOX17againstowncontroln2	NAT8L	7	132054	11	484438	0.0707276	0.907114	NAT8L	DOX17againstowncontroln2	2	3	2	4	0.636364
DOX17againstowncontroln2	NDUFC2	7	132054	11	484438	0.0707276	0.907114	NDUFC2	DOX17againstowncontroln2	4	0	3	0	1
DOX17againstowncontroln2	PLEKHF2	7	132054	11	484438	0.0707276	0.907114	PLEKHF2	DOX17againstowncontroln2	0	7	0	3	0.7
DOX17againstowncontroln2	PRUNE	7	132054	11	484438	0.0707276	0.907114	PRUNE	DOX17againstowncontroln2	0	7	0	3	0.7
DOX17againstowncontroln2	RAB3B	7	132054	11	484438	0.0707276	0.907114	RAB3B	DOX17againstowncontroln2	0	5	2	2	0.777778
DOX17againstowncontroln2	TTC33	7	132054	11	484438	0.0707276	0.907114	TTC33	DOX17againstowncontroln2	0	7	0	1	0.875
DOX17againstowncontroln2	AK4	14	132054	30	484438	0.0716407	0.912664	AK4	DOX17againstowncontroln2	0	14	0	8	0.636364
DOX17againstowncontroln2	DNAJC14	14	132054	30	484438	0.0716407	0.912664	DNAJC14	DOX17againstowncontroln2	3	9	2	8	0.636364
DOX17againstowncontroln2	JAG2	14	132054	30	484438	0.0716407	0.912664	JAG2	DOX17againstowncontroln2	1	12	1	3	0.823529
DOX17againstowncontroln2	LOC388796	14	132054	30	484438	0.0716407	0.912664	LOC388796	DOX17againstowncontroln2	2	8	4	7	0.666667
DOX17againstowncontroln2	RUFY1	14	132054	30	484438	0.0716407	0.912664	RUFY1	DOX17againstowncontroln2	1	12	1	11	0.56
DOX17againstowncontroln2	SLC25A11	14	132054	30	484438	0.0716407	0.912664	SLC25A11	DOX17againstowncontroln2	3	9	2	9	0.608696
DOX17againstowncontroln2	SLC25A45	14	132054	30	484438	0.0716407	0.912664	SLC25A45	DOX17againstowncontroln2	1	8	5	5	0.736842
DOX17againstowncontroln2	ZNF280C	54	132054	155	484438	0.072795	0.926482	ZNF280C	DOX17againstowncontroln2	1	53	0	39	0.580645
DOX17againstowncontroln2	CHRM3	15	132054	33	484438	0.0731872	0.928807	CHRM3	DOX17againstowncontroln2	0	15	0	11	0.576923
DOX17againstowncontroln2	EML1	15	132054	33	484438	0.0731872	0.928807	EML1	DOX17againstowncontroln2	0	15	0	13	0.535714
DOX17againstowncontroln2	PKN2	15	132054	33	484438	0.0731872	0.928807	PKN2	DOX17againstowncontroln2	0	15	0	6	0.714286
DOX17againstowncontroln2	BTBD2	10	132054	19	484438	0.0735553	0.929929	BTBD2	DOX17againstowncontroln2	2	8	0	4	0.714286
DOX17againstowncontroln2	CELSR3	10	132054	19	484438	0.0735553	0.929929	CELSR3	DOX17againstowncontroln2	7	2	1	2	0.833333
DOX17againstowncontroln2	ZBTB33	10	132054	19	484438	0.0735553	0.929929	ZBTB33	DOX17againstowncontroln2	1	8	1	5	0.666667
DOX17againstowncontroln2	ZFP36L2	10	132054	19	484438	0.0735553	0.929929	ZFP36L2	DOX17againstowncontroln2	5	0	5	0	1
DOX17againstowncontroln2	DTNB	26	132054	66	484438	0.0737394	0.931371	DTNB	DOX17againstowncontroln2	1	25	0	23	0.530612
DOX17againstowncontroln2	RAB2A	40	132054	110	484438	0.0738716	0.932156	RAB2A	DOX17againstowncontroln2	5	33	2	26	0.606061
DOX17againstowncontroln2	CD180	16	132054	36	484438	0.074322	0.933412	CD180	DOX17againstowncontroln2	9	2	5	1	0.941176
DOX17againstowncontroln2	NLN	16	132054	36	484438	0.074322	0.933412	NLN	DOX17againstowncontroln2	0	16	0	6	0.727273
DOX17againstowncontroln2	PCMTD1	16	132054	36	484438	0.074322	0.933412	PCMTD1	DOX17againstowncontroln2	0	15	1	14	0.533333
DOX17againstowncontroln2	SEC31A	16	132054	36	484438	0.074322	0.933412	SEC31A	DOX17againstowncontroln2	0	16	0	13	0.551724
DOX17againstowncontroln2	SLC16A1	16	132054	36	484438	0.074322	0.933412	SLC16A1	DOX17againstowncontroln2	1	9	6	5	0.761905
DOX17againstowncontroln2	PTPRG	102	132054	315	484438	0.0747367	0.937734	PTPRG	DOX17againstowncontroln2	0	100	2	82	0.554348
DOX17againstowncontroln2	CFL2	17	132054	39	484438	0.0751167	0.940727	CFL2	DOX17againstowncontroln2	8	4	5	6	0.73913
DOX17againstowncontroln2	SMAD7	17	132054	39	484438	0.0751167	0.940727	SMAD7	DOX17againstowncontroln2	4	13	0	10	0.62963
DOX17againstowncontroln2	IQCG	23	132054	57	484438	0.0753196	0.942381	IQCG	DOX17againstowncontroln2	4	16	3	11	0.676471
DOX17againstowncontroln2	EML3	18	132054	42	484438	0.0756287	0.943169	EML3	DOX17againstowncontroln2	5	9	4	6	0.75
DOX17againstowncontroln2	GRAMD3	18	132054	42	484438	0.0756287	0.943169	GRAMD3	DOX17againstowncontroln2	1	15	2	3	0.857143
DOX17againstowncontroln2	C12orf47	22	132054	54	484438	0.0756663	0.943169	C12orf47	DOX17againstowncontroln2	12	2	8	3	0.88
DOX17againstowncontroln2	FAM109B	22	132054	54	484438	0.0756663	0.943169	FAM109B	DOX17againstowncontroln2	8	0	14	0	1
DOX17againstowncontroln2	TP53I3	21	132054	51	484438	0.0758946	0.94437	TP53I3	DOX17againstowncontroln2	1	20	0	8	0.724138
DOX17againstowncontroln2	FLJ39582	19	132054	45	484438	0.0759047	0.94437	FLJ39582	DOX17againstowncontroln2	10	1	8	2	0.904762
DOX17againstowncontroln2	TPM3	47	132054	133	484438	0.0768659	0.955436	TPM3	DOX17againstowncontroln2	0	47	0	41	0.534091
DOX17againstowncontroln2	TBCK	31	132054	82	484438	0.0773394	0.959668	TBCK	DOX17againstowncontroln2	1	30	0	39	0.442857
DOX17againstowncontroln2	C4orf49	11	132054	22	484438	0.077495	0.959668	C4orf49	DOX17againstowncontroln2	4	2	5	2	0.846154
DOX17againstowncontroln2	KIAA0528	11	132054	22	484438	0.077495	0.959668	KIAA0528	DOX17againstowncontroln2	1	9	1	5	0.6875
DOX17againstowncontroln2	PYCR1	11	132054	22	484438	0.077495	0.959668	PYCR1	DOX17againstowncontroln2	5	2	4	1	0.916667
DOX17againstowncontroln2	CEP72	8	132054	14	484438	0.079212	0.966706	CEP72	DOX17againstowncontroln2	0	8	0	1	0.888889
DOX17againstowncontroln2	DHRS7B	8	132054	14	484438	0.079212	0.966706	DHRS7B	DOX17againstowncontroln2	0	8	0	5	0.615385
DOX17againstowncontroln2	FXR2	8	132054	14	484438	0.079212	0.966706	FXR2	DOX17againstowncontroln2	0	8	0	6	0.571429
DOX17againstowncontroln2	GSTO1	8	132054	14	484438	0.079212	0.966706	GSTO1	DOX17againstowncontroln2	2	6	0	3	0.727273
DOX17againstowncontroln2	HDHD1A	8	132054	14	484438	0.079212	0.966706	HDHD1A	DOX17againstowncontroln2	0	8	0	5	0.615385
DOX17againstowncontroln2	LOC400657	8	132054	14	484438	0.079212	0.966706	LOC400657	DOX17againstowncontroln2	2	1	5	0	1
DOX17againstowncontroln2	SDCBP	8	132054	14	484438	0.079212	0.966706	SDCBP	DOX17againstowncontroln2	0	8	0	4	0.666667
DOX17againstowncontroln2	SLC34A1	8	132054	14	484438	0.079212	0.966706	SLC34A1	DOX17againstowncontroln2	5	1	2	2	0.8
DOX17againstowncontroln2	SSR3	8	132054	14	484438	0.079212	0.966706	SSR3	DOX17againstowncontroln2	0	8	0	1	0.888889
DOX17againstowncontroln2	TTC37	8	132054	14	484438	0.079212	0.966706	TTC37	DOX17againstowncontroln2	0	8	0	5	0.615385
DOX17againstowncontroln2	ZNF517	8	132054	14	484438	0.079212	0.966706	ZNF517	DOX17againstowncontroln2	0	8	0	2	0.8
DOX17againstowncontroln2	GULP1	35	132054	95	484438	0.0801052	0.966706	GULP1	DOX17againstowncontroln2	1	33	1	19	0.648148
DOX17againstowncontroln2	IDH3A	35	132054	95	484438	0.0801052	0.966706	IDH3A	DOX17againstowncontroln2	2	33	0	27	0.564516
DOX17againstowncontroln2	CTNNA1	106	132054	330	484438	0.0803649	0.966706	CTNNA1	DOX17againstowncontroln2	0	106	0	75	0.585635
DOX17againstowncontroln2	GNL3L	40	132054	111	484438	0.0803821	0.966706	GNL3L	DOX17againstowncontroln2	12	6	22	9	0.816327
DOX17againstowncontroln2	DYSFIP1	12	132054	25	484438	0.0804658	0.966706	DYSFIP1	DOX17againstowncontroln2	4	0	8	2	0.857143
DOX17againstowncontroln2	LOC100289511	12	132054	25	484438	0.0804658	0.966706	LOC100289511	DOX17againstowncontroln2	7	0	5	0	1
DOX17againstowncontroln2	SLFN11	12	132054	25	484438	0.0804658	0.966706	SLFN11	DOX17againstowncontroln2	1	10	1	5	0.705882
DOX17againstowncontroln2	ALDH3B1	6	132054	9	484438	0.0811888	0.966706	ALDH3B1	DOX17againstowncontroln2	1	5	0	6	0.5
DOX17againstowncontroln2	ALKBH4	6	132054	9	484438	0.0811888	0.966706	ALKBH4	DOX17againstowncontroln2	0	5	1	5	0.545455
DOX17againstowncontroln2	ANGPTL5	6	132054	9	484438	0.0811888	0.966706	ANGPTL5	DOX17againstowncontroln2	0	2	4	6	0.5
DOX17againstowncontroln2	ANTXR2	6	132054	9	484438	0.0811888	0.966706	ANTXR2	DOX17againstowncontroln2	2	3	1	2	0.75
DOX17againstowncontroln2	ARHGDIG	6	132054	9	484438	0.0811888	0.966706	ARHGDIG	DOX17againstowncontroln2	1	5	0	4	0.6
DOX17againstowncontroln2	C14orf184	6	132054	9	484438	0.0811888	0.966706	C14orf184	DOX17againstowncontroln2	1	0	5	0	1
DOX17againstowncontroln2	CORO7	6	132054	9	484438	0.0811888	0.966706	CORO7	DOX17againstowncontroln2	0	5	1	6	0.5
DOX17againstowncontroln2	FBXL16	6	132054	9	484438	0.0811888	0.966706	FBXL16	DOX17againstowncontroln2	0	4	2	2	0.75
DOX17againstowncontroln2	HERPUD1	6	132054	9	484438	0.0811888	0.966706	HERPUD1	DOX17againstowncontroln2	0	6	0	2	0.75
DOX17againstowncontroln2	HK2	6	132054	9	484438	0.0811888	0.966706	HK2	DOX17againstowncontroln2	0	6	0	6	0.5
DOX17againstowncontroln2	MKI67IP	6	132054	9	484438	0.0811888	0.966706	MKI67IP	DOX17againstowncontroln2	0	6	0	2	0.75
DOX17againstowncontroln2	MYO15B	6	132054	9	484438	0.0811888	0.966706	MYO15B	DOX17againstowncontroln2	4	0	2	1	0.857143
DOX17againstowncontroln2	PCYT2	6	132054	9	484438	0.0811888	0.966706	PCYT2	DOX17againstowncontroln2	4	2	0	4	0.6
DOX17againstowncontroln2	PHPT1	6	132054	9	484438	0.0811888	0.966706	PHPT1	DOX17againstowncontroln2	2	0	4	1	0.857143
DOX17againstowncontroln2	RANBP6	6	132054	9	484438	0.0811888	0.966706	RANBP6	DOX17againstowncontroln2	1	0	5	0	1
DOX17againstowncontroln2	RGL2	6	132054	9	484438	0.0811888	0.966706	RGL2	DOX17againstowncontroln2	3	1	2	2	0.75
DOX17againstowncontroln2	RNF121	6	132054	9	484438	0.0811888	0.966706	RNF121	DOX17againstowncontroln2	2	4	0	4	0.6
DOX17againstowncontroln2	SAMD1	6	132054	9	484438	0.0811888	0.966706	SAMD1	DOX17againstowncontroln2	2	2	2	0	1
DOX17againstowncontroln2	SPIN3	6	132054	9	484438	0.0811888	0.966706	SPIN3	DOX17againstowncontroln2	2	2	2	2	0.75
DOX17againstowncontroln2	TCN2	6	132054	9	484438	0.0811888	0.966706	TCN2	DOX17againstowncontroln2	2	2	2	2	0.75
DOX17againstowncontroln2	TMEM5	6	132054	9	484438	0.0811888	0.966706	TMEM5	DOX17againstowncontroln2	2	3	1	6	0.5
DOX17againstowncontroln2	USP45	6	132054	9	484438	0.0811888	0.966706	USP45	DOX17againstowncontroln2	2	4	0	5	0.545455
DOX17againstowncontroln2	VWA1	6	132054	9	484438	0.0811888	0.966706	VWA1	DOX17againstowncontroln2	2	4	0	3	0.666667
DOX17againstowncontroln2	WDR24	6	132054	9	484438	0.0811888	0.966706	WDR24	DOX17againstowncontroln2	2	2	2	1	0.857143
DOX17againstowncontroln2	ZNF397OS	6	132054	9	484438	0.0811888	0.966706	ZNF397OS	DOX17againstowncontroln2	3	3	0	3	0.666667
DOX17againstowncontroln2	VGLL4	39	132054	108	484438	0.0817844	0.972928	VGLL4	DOX17againstowncontroln2	5	30	4	15	0.722222
DOX17againstowncontroln2	KIF3B	55	132054	160	484438	0.0822401	0.977474	KIF3B	DOX17againstowncontroln2	0	55	0	27	0.670732
DOX17againstowncontroln2	C15orf17	33	132054	89	484438	0.0826487	0.979997	C15orf17	DOX17againstowncontroln2	9	19	5	12	0.733333
DOX17againstowncontroln2	AP4M1	13	132054	28	484438	0.0826735	0.979997	AP4M1	DOX17againstowncontroln2	2	8	3	4	0.764706
DOX17againstowncontroln2	CCT6B	13	132054	28	484438	0.0826735	0.979997	CCT6B	DOX17againstowncontroln2	0	11	2	12	0.52
DOX17againstowncontroln2	LRRIQ4	24	132054	61	484438	0.0839131	0.992606	LRRIQ4	DOX17againstowncontroln2	1	19	4	18	0.571429
DOX17againstowncontroln2	ZNF148	24	132054	61	484438	0.0839131	0.992606	ZNF148	DOX17againstowncontroln2	1	23	0	10	0.705882
DOX17againstowncontroln2	KCTD15	14	132054	31	484438	0.0842736	0.992606	KCTD15	DOX17againstowncontroln2	1	11	2	7	0.666667
DOX17againstowncontroln2	NES	14	132054	31	484438	0.0842736	0.992606	NES	DOX17againstowncontroln2	0	11	3	8	0.636364
DOX17againstowncontroln2	CCR10	23	132054	58	484438	0.0846483	0.992606	CCR10	DOX17againstowncontroln2	11	5	7	5	0.821429
DOX17againstowncontroln2	PPFIBP1	23	132054	58	484438	0.0846483	0.992606	PPFIBP1	DOX17againstowncontroln2	1	20	2	13	0.638889
DOX17againstowncontroln2	BTK	15	132054	34	484438	0.0853854	0.992606	BTK	DOX17againstowncontroln2	5	7	3	4	0.789474
DOX17againstowncontroln2	TMLHE	15	132054	34	484438	0.0853854	0.992606	TMLHE	DOX17againstowncontroln2	0	15	0	9	0.625
DOX17againstowncontroln2	CCDC134	9	132054	17	484438	0.0854238	0.992606	CCDC134	DOX17againstowncontroln2	0	9	0	1	0.9
DOX17againstowncontroln2	LIPT1	9	132054	17	484438	0.0854238	0.992606	LIPT1	DOX17againstowncontroln2	1	8	0	2	0.818182
DOX17againstowncontroln2	LRRC8A	9	132054	17	484438	0.0854238	0.992606	LRRC8A	DOX17againstowncontroln2	4	2	3	2	0.818182
DOX17againstowncontroln2	MRI1	9	132054	17	484438	0.0854238	0.992606	MRI1	DOX17againstowncontroln2	0	9	0	2	0.818182
DOX17againstowncontroln2	NEURL2	9	132054	17	484438	0.0854238	0.992606	NEURL2	DOX17againstowncontroln2	2	1	6	0	1
DOX17againstowncontroln2	SS18L1	9	132054	17	484438	0.0854238	0.992606	SS18L1	DOX17againstowncontroln2	6	0	3	1	0.9
DOX17againstowncontroln2	ZNF343	9	132054	17	484438	0.0854238	0.992606	ZNF343	DOX17againstowncontroln2	0	8	1	5	0.642857
DOX17againstowncontroln2	PCDHA10	78	132054	237	484438	0.0859775	0.992606	PCDHA10	DOX17againstowncontroln2	3	75	0	78	0.5
DOX17againstowncontroln2	PCDHA11	78	132054	237	484438	0.0859775	0.992606	PCDHA11	DOX17againstowncontroln2	3	75	0	78	0.5
DOX17againstowncontroln2	PCDHA12	78	132054	237	484438	0.0859775	0.992606	PCDHA12	DOX17againstowncontroln2	3	75	0	78	0.5
DOX17againstowncontroln2	PCDHA13	78	132054	237	484438	0.0859775	0.992606	PCDHA13	DOX17againstowncontroln2	3	75	0	78	0.5
DOX17againstowncontroln2	PCDHA3	78	132054	237	484438	0.0859775	0.992606	PCDHA3	DOX17againstowncontroln2	3	75	0	78	0.5
DOX17againstowncontroln2	PCDHA4	78	132054	237	484438	0.0859775	0.992606	PCDHA4	DOX17againstowncontroln2	3	75	0	78	0.5
DOX17againstowncontroln2	PCDHA5	78	132054	237	484438	0.0859775	0.992606	PCDHA5	DOX17againstowncontroln2	3	75	0	78	0.5
DOX17againstowncontroln2	PCDHA6	78	132054	237	484438	0.0859775	0.992606	PCDHA6	DOX17againstowncontroln2	3	75	0	78	0.5
DOX17againstowncontroln2	PCDHA7	78	132054	237	484438	0.0859775	0.992606	PCDHA7	DOX17againstowncontroln2	3	75	0	78	0.5
DOX17againstowncontroln2	PCDHA8	78	132054	237	484438	0.0859775	0.992606	PCDHA8	DOX17againstowncontroln2	3	75	0	78	0.5
DOX17againstowncontroln2	PCDHA9	78	132054	237	484438	0.0859775	0.992606	PCDHA9	DOX17againstowncontroln2	3	75	0	78	0.5
DOX17againstowncontroln2	GRAMD1C	36	132054	99	484438	0.0860979	0.992606	GRAMD1C	DOX17againstowncontroln2	4	32	0	23	0.610169
DOX17againstowncontroln2	C20orf177	16	132054	37	484438	0.0861017	0.992606	C20orf177	DOX17againstowncontroln2	2	12	2	7	0.695652
DOX17againstowncontroln2	MSL1	16	132054	37	484438	0.0861017	0.992606	MSL1	DOX17againstowncontroln2	5	8	3	10	0.615385
DOX17againstowncontroln2	ZNF580	16	132054	37	484438	0.0861017	0.992606	ZNF580	DOX17againstowncontroln2	6	1	9	6	0.727273
DOX17againstowncontroln2	SPAG7	20	132054	49	484438	0.0862632	0.992606	SPAG7	DOX17againstowncontroln2	0	20	0	17	0.540541
DOX17againstowncontroln2	NDRG3	17	132054	40	484438	0.0864952	0.992606	NDRG3	DOX17againstowncontroln2	0	17	0	8	0.68
DOX17againstowncontroln2	ABCC5	19	132054	46	484438	0.0865339	0.992606	ABCC5	DOX17againstowncontroln2	0	19	0	11	0.633333
DOX17againstowncontroln2	DLG1	19	132054	46	484438	0.0865339	0.992606	DLG1	DOX17againstowncontroln2	3	16	0	10	0.655172
DOX17againstowncontroln2	SALL1	19	132054	46	484438	0.0865339	0.992606	SALL1	DOX17againstowncontroln2	2	16	1	14	0.575758
DOX17againstowncontroln2	DAZAP1	18	132054	43	484438	0.0866237	0.992606	DAZAP1	DOX17againstowncontroln2	0	18	0	8	0.692308
DOX17againstowncontroln2	POGZ	18	132054	43	484438	0.0866237	0.992606	POGZ	DOX17againstowncontroln2	3	14	1	11	0.62069
DOX17againstowncontroln2	CSAD	29	132054	77	484438	0.0877179	0.992606	CSAD	DOX17againstowncontroln2	2	21	6	18	0.617021
DOX17againstowncontroln2	SLC22A15	76	132054	231	484438	0.0893847	0.992606	SLC22A15	DOX17againstowncontroln2	0	75	1	47	0.617886
DOX17againstowncontroln2	PXT1	64	132054	191	484438	0.0894753	0.992606	PXT1	DOX17againstowncontroln2	9	48	7	52	0.551724
DOX17againstowncontroln2	ARL6IP4	10	132054	20	484438	0.0899661	0.992606	ARL6IP4	DOX17againstowncontroln2	5	3	2	7	0.588235
DOX17againstowncontroln2	CSNK1D	10	132054	20	484438	0.0899661	0.992606	CSNK1D	DOX17againstowncontroln2	1	8	1	9	0.526316
DOX17againstowncontroln2	GAS5	10	132054	20	484438	0.0899661	0.992606	GAS5	DOX17againstowncontroln2	1	8	1	9	0.526316
DOX17againstowncontroln2	GOLGA2B	10	132054	20	484438	0.0899661	0.992606	GOLGA2B	DOX17againstowncontroln2	4	0	6	1	0.909091
DOX17againstowncontroln2	LOC153684	10	132054	20	484438	0.0899661	0.992606	LOC153684	DOX17againstowncontroln2	4	1	5	0	1
DOX17againstowncontroln2	MED12	10	132054	20	484438	0.0899661	0.992606	MED12	DOX17againstowncontroln2	3	7	0	3	0.769231
DOX17againstowncontroln2	PM20D2	10	132054	20	484438	0.0899661	0.992606	PM20D2	DOX17againstowncontroln2	1	7	2	5	0.666667
DOX17againstowncontroln2	SMO	10	132054	20	484438	0.0899661	0.992606	SMO	DOX17againstowncontroln2	2	6	2	7	0.588235
DOX17againstowncontroln2	TRIM62	10	132054	20	484438	0.0899661	0.992606	TRIM62	DOX17againstowncontroln2	0	10	0	3	0.769231
DOX17againstowncontroln2	RUNX1	38	132054	106	484438	0.0904871	0.992606	RUNX1	DOX17againstowncontroln2	1	33	4	29	0.567164
DOX17againstowncontroln2	BRD2	50	132054	145	484438	0.0905938	0.992606	BRD2	DOX17againstowncontroln2	7	37	6	41	0.549451
DOX17againstowncontroln2	PCDHA1	78	132054	238	484438	0.0908654	0.992606	PCDHA1	DOX17againstowncontroln2	3	75	0	78	0.5
DOX17againstowncontroln2	PCDHA2	78	132054	238	484438	0.0908654	0.992606	PCDHA2	DOX17againstowncontroln2	3	75	0	78	0.5
DOX17againstowncontroln2	PCDHAC2	75	132054	228	484438	0.0911459	0.992606	PCDHAC2	DOX17againstowncontroln2	4	69	2	72	0.510204
DOX17againstowncontroln2	NR1H4	69	132054	208	484438	0.0914327	0.992606	NR1H4	DOX17againstowncontroln2	0	69	0	53	0.565574
DOX17againstowncontroln2	C13orf23	7	132054	12	484438	0.0920182	0.992606	C13orf23	DOX17againstowncontroln2	3	3	1	3	0.7
DOX17againstowncontroln2	CASC1	7	132054	12	484438	0.0920182	0.992606	CASC1	DOX17againstowncontroln2	0	7	0	0	1
DOX17againstowncontroln2	CAT	7	132054	12	484438	0.0920182	0.992606	CAT	DOX17againstowncontroln2	0	6	1	3	0.7
DOX17againstowncontroln2	ERICH1	7	132054	12	484438	0.0920182	0.992606	ERICH1	DOX17againstowncontroln2	0	7	0	0	1
DOX17againstowncontroln2	FBLN5	7	132054	12	484438	0.0920182	0.992606	FBLN5	DOX17againstowncontroln2	1	5	1	1	0.875
DOX17againstowncontroln2	GFM1	7	132054	12	484438	0.0920182	0.992606	GFM1	DOX17againstowncontroln2	0	7	0	4	0.636364
DOX17againstowncontroln2	HNRNPA0	7	132054	12	484438	0.0920182	0.992606	HNRNPA0	DOX17againstowncontroln2	2	0	5	0	1
DOX17againstowncontroln2	LOC389333	7	132054	12	484438	0.0920182	0.992606	LOC389333	DOX17againstowncontroln2	2	0	5	0	1
DOX17againstowncontroln2	OSBP2	7	132054	12	484438	0.0920182	0.992606	OSBP2	DOX17againstowncontroln2	4	2	1	4	0.636364
DOX17againstowncontroln2	PAPPA2	7	132054	12	484438	0.0920182	0.992606	PAPPA2	DOX17againstowncontroln2	0	6	1	6	0.538462
DOX17againstowncontroln2	SIX4	7	132054	12	484438	0.0920182	0.992606	SIX4	DOX17againstowncontroln2	3	4	0	0	1
DOX17againstowncontroln2	STARD3	7	132054	12	484438	0.0920182	0.992606	STARD3	DOX17againstowncontroln2	0	7	0	4	0.636364
DOX17againstowncontroln2	UBE2H	186	132054	608	484438	0.0922247	0.992606	UBE2H	DOX17againstowncontroln2	0	186	0	162	0.534483
DOX17againstowncontroln2	RAPGEF4	59	132054	175	484438	0.0927669	0.992606	RAPGEF4	DOX17againstowncontroln2	0	59	0	36	0.621053
DOX17againstowncontroln2	BSG	45	132054	129	484438	0.0928362	0.992606	BSG	DOX17againstowncontroln2	3	36	6	25	0.642857
DOX17againstowncontroln2	ATP6V1B1	5	132054	7	484438	0.0929454	0.992606	ATP6V1B1	DOX17againstowncontroln2	0	5	0	5	0.5
DOX17againstowncontroln2	BBS7	5	132054	7	484438	0.0929454	0.992606	BBS7	DOX17againstowncontroln2	2	1	2	2	0.714286
DOX17againstowncontroln2	C11orf74	5	132054	7	484438	0.0929454	0.992606	C11orf74	DOX17againstowncontroln2	0	5	0	2	0.714286
DOX17againstowncontroln2	C3orf17	5	132054	7	484438	0.0929454	0.992606	C3orf17	DOX17againstowncontroln2	1	3	1	2	0.714286
DOX17againstowncontroln2	CENPF	5	132054	7	484438	0.0929454	0.992606	CENPF	DOX17againstowncontroln2	0	5	0	2	0.714286
DOX17againstowncontroln2	CHRNA7	5	132054	7	484438	0.0929454	0.992606	CHRNA7	DOX17againstowncontroln2	2	2	1	1	0.833333
DOX17againstowncontroln2	COX6B2	5	132054	7	484438	0.0929454	0.992606	COX6B2	DOX17againstowncontroln2	2	1	2	0	1
DOX17againstowncontroln2	DBX2	5	132054	7	484438	0.0929454	0.992606	DBX2	DOX17againstowncontroln2	0	3	2	3	0.625
DOX17againstowncontroln2	DUSP12	5	132054	7	484438	0.0929454	0.992606	DUSP12	DOX17againstowncontroln2	2	1	2	0	1
DOX17againstowncontroln2	ERBB3	5	132054	7	484438	0.0929454	0.992606	ERBB3	DOX17againstowncontroln2	1	2	2	0	1
DOX17againstowncontroln2	FXR1	5	132054	7	484438	0.0929454	0.992606	FXR1	DOX17againstowncontroln2	0	3	2	1	0.833333
DOX17againstowncontroln2	LEMD2	5	132054	7	484438	0.0929454	0.992606	LEMD2	DOX17againstowncontroln2	3	1	1	1	0.833333
DOX17againstowncontroln2	LOC440356	5	132054	7	484438	0.0929454	0.992606	LOC440356	DOX17againstowncontroln2	1	4	0	0	1
DOX17againstowncontroln2	PLS1	5	132054	7	484438	0.0929454	0.992606	PLS1	DOX17againstowncontroln2	0	5	0	3	0.625
DOX17againstowncontroln2	SAP30	5	132054	7	484438	0.0929454	0.992606	SAP30	DOX17againstowncontroln2	0	5	0	3	0.625
DOX17againstowncontroln2	SLC39A12	5	132054	7	484438	0.0929454	0.992606	SLC39A12	DOX17againstowncontroln2	0	4	1	6	0.454545
DOX17againstowncontroln2	TMF1	5	132054	7	484438	0.0929454	0.992606	TMF1	DOX17againstowncontroln2	0	3	2	2	0.714286
DOX17againstowncontroln2	TNFRSF12A	5	132054	7	484438	0.0929454	0.992606	TNFRSF12A	DOX17againstowncontroln2	4	1	0	4	0.555556
DOX17againstowncontroln2	YPEL2	5	132054	7	484438	0.0929454	0.992606	YPEL2	DOX17againstowncontroln2	0	5	0	3	0.625
DOX17againstowncontroln2	ZBTB46	5	132054	7	484438	0.0929454	0.992606	ZBTB46	DOX17againstowncontroln2	0	5	0	1	0.833333
DOX17againstowncontroln2	ZNF446	5	132054	7	484438	0.0929454	0.992606	ZNF446	DOX17againstowncontroln2	1	2	2	2	0.714286
DOX17againstowncontroln2	C1orf96	11	132054	23	484438	0.0932589	0.992606	C1orf96	DOX17againstowncontroln2	6	0	5	1	0.916667
DOX17againstowncontroln2	C9orf93	11	132054	23	484438	0.0932589	0.992606	C9orf93	DOX17againstowncontroln2	1	10	0	2	0.846154
DOX17againstowncontroln2	LOC255512	11	132054	23	484438	0.0932589	0.992606	LOC255512	DOX17againstowncontroln2	6	0	5	0	1
DOX17againstowncontroln2	LONP2	11	132054	23	484438	0.0932589	0.992606	LONP2	DOX17againstowncontroln2	0	11	0	6	0.647059
DOX17againstowncontroln2	SLC35C1	11	132054	23	484438	0.0932589	0.992606	SLC35C1	DOX17againstowncontroln2	3	5	3	3	0.785714
DOX17againstowncontroln2	VILL	11	132054	23	484438	0.0932589	0.992606	VILL	DOX17againstowncontroln2	1	10	0	4	0.733333
DOX17againstowncontroln2	WDR89	11	132054	23	484438	0.0932589	0.992606	WDR89	DOX17againstowncontroln2	1	7	3	6	0.647059
DOX17againstowncontroln2	ZCCHC3	11	132054	23	484438	0.0932589	0.992606	ZCCHC3	DOX17againstowncontroln2	6	0	5	0	1
DOX17againstowncontroln2	DAG1	24	132054	62	484438	0.0936519	0.992606	DAG1	DOX17againstowncontroln2	3	19	2	16	0.6
DOX17againstowncontroln2	HDGF	48	132054	139	484438	0.0942	0.992606	HDGF	DOX17againstowncontroln2	2	39	7	45	0.516129
DOX17againstowncontroln2	CAMK1D	23	132054	59	484438	0.0947119	0.992606	CAMK1D	DOX17againstowncontroln2	1	22	0	17	0.575
DOX17againstowncontroln2	ALKBH2	12	132054	26	484438	0.0955999	0.992606	ALKBH2	DOX17againstowncontroln2	4	5	3	8	0.6
DOX17againstowncontroln2	ARHGEF38	12	132054	26	484438	0.0955999	0.992606	ARHGEF38	DOX17againstowncontroln2	1	7	4	0	1
DOX17againstowncontroln2	PDCD5	12	132054	26	484438	0.0955999	0.992606	PDCD5	DOX17againstowncontroln2	0	12	0	6	0.666667
DOX17againstowncontroln2	PEX12	12	132054	26	484438	0.0955999	0.992606	PEX12	DOX17againstowncontroln2	5	1	6	1	0.923077
DOX17againstowncontroln2	PUS7	12	132054	26	484438	0.0955999	0.992606	PUS7	DOX17againstowncontroln2	1	11	0	8	0.6
DOX17againstowncontroln2	TRPV2	12	132054	26	484438	0.0955999	0.992606	TRPV2	DOX17againstowncontroln2	4	6	2	5	0.705882
DOX17againstowncontroln2	MAPT	39	132054	110	484438	0.0963619	0.992606	MAPT	DOX17againstowncontroln2	0	38	1	33	0.541667
DOX17againstowncontroln2	OSCP1	43	132054	123	484438	0.0964865	0.992606	OSCP1	DOX17againstowncontroln2	0	43	0	32	0.573333
DOX17againstowncontroln2	MED18	21	132054	53	484438	0.0966094	0.992606	MED18	DOX17againstowncontroln2	4	14	3	5	0.807692
DOX17againstowncontroln2	MIR548H2	21	132054	53	484438	0.0966094	0.992606	MIR548H2	DOX17againstowncontroln2	0	21	0	11	0.65625
DOX17againstowncontroln2	LHX2	13	132054	29	484438	0.0972048	0.992606	LHX2	DOX17againstowncontroln2	0	12	1	6	0.684211
DOX17againstowncontroln2	TRIM7	13	132054	29	484438	0.0972048	0.992606	TRIM7	DOX17againstowncontroln2	2	5	6	1	0.928571
DOX17againstowncontroln2	NAPEPLD	20	132054	50	484438	0.0974112	0.992606	NAPEPLD	DOX17againstowncontroln2	3	12	5	15	0.571429
DOX17againstowncontroln2	RGMA	20	132054	50	484438	0.0974112	0.992606	RGMA	DOX17againstowncontroln2	3	17	0	10	0.666667
DOX17againstowncontroln2	STAT6	20	132054	50	484438	0.0974112	0.992606	STAT6	DOX17againstowncontroln2	5	11	4	12	0.625
DOX17againstowncontroln2	MEG3	53	132054	156	484438	0.0979311	0.992606	MEG3	DOX17againstowncontroln2	8	40	5	32	0.623529
DOX17againstowncontroln2	MEIS1	53	132054	156	484438	0.0979311	0.992606	MEIS1	DOX17againstowncontroln2	2	50	1	44	0.546392
DOX17againstowncontroln2	DNAJC1	38	132054	107	484438	0.0981879	0.992606	DNAJC1	DOX17againstowncontroln2	0	38	0	27	0.584615
DOX17againstowncontroln2	C1orf216	14	132054	32	484438	0.0982331	0.992606	C1orf216	DOX17againstowncontroln2	1	7	6	9	0.608696
DOX17againstowncontroln2	DPP4	14	132054	32	484438	0.0982331	0.992606	DPP4	DOX17againstowncontroln2	1	12	1	7	0.666667
DOX17againstowncontroln2	ITPK1	14	132054	32	484438	0.0982331	0.992606	ITPK1	DOX17againstowncontroln2	0	14	0	9	0.608696
DOX17againstowncontroln2	TM9SF1	14	132054	32	484438	0.0982331	0.992606	TM9SF1	DOX17againstowncontroln2	2	6	6	3	0.823529
DOX17againstowncontroln2	ROD1	42	132054	120	484438	0.09837	0.992606	ROD1	DOX17againstowncontroln2	2	35	5	20	0.677419
DOX17againstowncontroln2	C3orf23	18	132054	44	484438	0.0986016	0.992606	C3orf23	DOX17againstowncontroln2	0	16	2	4	0.818182
DOX17againstowncontroln2	KIAA1530	18	132054	44	484438	0.0986016	0.992606	KIAA1530	DOX17againstowncontroln2	4	10	4	12	0.6
DOX17againstowncontroln2	NR1D1	15	132054	35	484438	0.0988048	0.992606	NR1D1	DOX17againstowncontroln2	7	6	2	15	0.5
DOX17againstowncontroln2	STRN4	15	132054	35	484438	0.0988048	0.992606	STRN4	DOX17againstowncontroln2	1	14	0	6	0.714286
DOX17againstowncontroln2	ACAA2	17	132054	41	484438	0.0989254	0.992606	ACAA2	DOX17againstowncontroln2	1	16	0	6	0.73913
DOX17againstowncontroln2	LRRC1	140	132054	451	484438	0.0989812	0.992606	LRRC1	DOX17againstowncontroln2	5	131	4	127	0.524345
DOX17againstowncontroln2	EMILIN1	16	132054	38	484438	0.0990118	0.992606	EMILIN1	DOX17againstowncontroln2	3	9	4	4	0.8
DOX17againstowncontroln2	SKP2	16	132054	38	484438	0.0990118	0.992606	SKP2	DOX17againstowncontroln2	1	13	2	8	0.666667
DOX17againstowncontroln2	TMEM150C	16	132054	38	484438	0.0990118	0.992606	TMEM150C	DOX17againstowncontroln2	0	16	0	10	0.615385
DOX17againstowncontroln2	ABHD1	8	132054	15	484438	0.0995407	0.992606	ABHD1	DOX17againstowncontroln2	2	3	3	2	0.8
DOX17againstowncontroln2	AKNAD1	8	132054	15	484438	0.0995407	0.992606	AKNAD1	DOX17againstowncontroln2	1	5	2	3	0.727273
DOX17againstowncontroln2	ARPC5	8	132054	15	484438	0.0995407	0.992606	ARPC5	DOX17againstowncontroln2	2	5	1	7	0.533333
DOX17againstowncontroln2	GLTPD2	8	132054	15	484438	0.0995407	0.992606	GLTPD2	DOX17againstowncontroln2	3	1	4	1	0.888889
DOX17againstowncontroln2	LOC645431	8	132054	15	484438	0.0995407	0.992606	LOC645431	DOX17againstowncontroln2	3	0	5	0	1
DOX17againstowncontroln2	MEPCE	8	132054	15	484438	0.0995407	0.992606	MEPCE	DOX17againstowncontroln2	4	1	3	0	1
DOX17againstowncontroln2	PLAA	8	132054	15	484438	0.0995407	0.992606	PLAA	DOX17againstowncontroln2	0	6	2	2	0.8
DOX17againstowncontroln2	RNASEN	8	132054	15	484438	0.0995407	0.992606	RNASEN	DOX17againstowncontroln2	0	7	1	5	0.615385
DOX17againstowncontroln2	SNX4	8	132054	15	484438	0.0995407	0.992606	SNX4	DOX17againstowncontroln2	0	8	0	7	0.533333
DOX17againstowncontroln2	UBE3A	8	132054	15	484438	0.0995407	0.992606	UBE3A	DOX17againstowncontroln2	0	8	0	7	0.533333
DOX17againstowncontroln2	ZNF267	8	132054	15	484438	0.0995407	0.992606	ZNF267	DOX17againstowncontroln2	1	6	1	1	0.888889
DOX17againstowncontroln2	ZNF643	8	132054	15	484438	0.0995407	0.992606	ZNF643	DOX17againstowncontroln2	4	2	2	3	0.727273
DOX17againstowncontroln2	ZNF764	8	132054	15	484438	0.0995407	0.992606	ZNF764	DOX17againstowncontroln2	2	5	1	2	0.8
DOX17againstowncontroln2	TFAP2C	37	132054	104	484438	0.100048	0.992606	TFAP2C	DOX17againstowncontroln2	10	25	2	34	0.521127
DOX17againstowncontroln2	SESTD1	41	132054	117	484438	0.100294	0.992606	SESTD1	DOX17againstowncontroln2	2	39	0	35	0.539474
DOX17againstowncontroln2	C20orf72	40	132054	114	484438	0.102258	0.992606	C20orf72	DOX17againstowncontroln2	7	24	9	22	0.645161
DOX17againstowncontroln2	RPL41	25	132054	66	484438	0.102641	0.992606	RPL41	DOX17againstowncontroln2	5	20	0	20	0.555556
DOX17againstowncontroln2	PCDHAC1	77	132054	237	484438	0.103217	0.992606	PCDHAC1	DOX17againstowncontroln2	3	74	0	77	0.5
DOX17againstowncontroln2	COL4A3	74	132054	227	484438	0.10378	0.992606	COL4A3	DOX17againstowncontroln2	18	43	13	30	0.711538
DOX17againstowncontroln2	TASP1	35	132054	98	484438	0.10387	0.992606	TASP1	DOX17againstowncontroln2	0	34	1	33	0.514706
DOX17againstowncontroln2	PPFIA3	24	132054	63	484438	0.104098	0.992606	PPFIA3	DOX17againstowncontroln2	3	14	7	10	0.705882
DOX17againstowncontroln2	ADAMTS18	9	132054	18	484438	0.104778	0.992606	ADAMTS18	DOX17againstowncontroln2	1	8	0	5	0.642857
DOX17againstowncontroln2	ADAMTS9	9	132054	18	484438	0.104778	0.992606	ADAMTS9	DOX17againstowncontroln2	4	5	0	6	0.6
DOX17againstowncontroln2	APOF	9	132054	18	484438	0.104778	0.992606	APOF	DOX17againstowncontroln2	3	0	6	0	1
DOX17againstowncontroln2	ARHGDIA	9	132054	18	484438	0.104778	0.992606	ARHGDIA	DOX17againstowncontroln2	2	4	3	2	0.818182
DOX17againstowncontroln2	DDX21	9	132054	18	484438	0.104778	0.992606	DDX21	DOX17againstowncontroln2	0	9	0	10	0.473684
DOX17againstowncontroln2	LOH12CR2	9	132054	18	484438	0.104778	0.992606	LOH12CR2	DOX17againstowncontroln2	1	0	8	3	0.75
DOX17againstowncontroln2	RGP1	9	132054	18	484438	0.104778	0.992606	RGP1	DOX17againstowncontroln2	1	7	1	5	0.642857
DOX17againstowncontroln2	TAF4B	9	132054	18	484438	0.104778	0.992606	TAF4B	DOX17againstowncontroln2	1	8	0	2	0.818182
DOX17againstowncontroln2	TAOK2	9	132054	18	484438	0.104778	0.992606	TAOK2	DOX17againstowncontroln2	3	5	1	2	0.818182
DOX17againstowncontroln2	UROC1	9	132054	18	484438	0.104778	0.992606	UROC1	DOX17againstowncontroln2	0	9	0	5	0.642857
DOX17againstowncontroln2	NECAB3	23	132054	60	484438	0.105519	0.992606	NECAB3	DOX17againstowncontroln2	1	22	0	19	0.547619
DOX17againstowncontroln2	RPL23A	23	132054	60	484438	0.105519	0.992606	RPL23A	DOX17againstowncontroln2	1	21	1	16	0.589744
DOX17againstowncontroln2	ASB4	4	132054	5	484438	0.10557	0.992606	ASB4	DOX17againstowncontroln2	0	4	0	5	0.444444
DOX17againstowncontroln2	BBS10	4	132054	5	484438	0.10557	0.992606	BBS10	DOX17againstowncontroln2	2	0	2	0	1
DOX17againstowncontroln2	C3orf47	4	132054	5	484438	0.10557	0.992606	C3orf47	DOX17againstowncontroln2	0	0	4	0	1
DOX17againstowncontroln2	C8orf73	4	132054	5	484438	0.10557	0.992606	C8orf73	DOX17againstowncontroln2	1	1	2	1	0.8
DOX17againstowncontroln2	CANT1	4	132054	5	484438	0.10557	0.992606	CANT1	DOX17againstowncontroln2	0	3	1	0	1
DOX17againstowncontroln2	CDKN3	4	132054	5	484438	0.10557	0.992606	CDKN3	DOX17againstowncontroln2	1	3	0	3	0.571429
DOX17againstowncontroln2	CDS1	4	132054	5	484438	0.10557	0.992606	CDS1	DOX17againstowncontroln2	1	2	1	5	0.444444
DOX17againstowncontroln2	CDX2	4	132054	5	484438	0.10557	0.992606	CDX2	DOX17againstowncontroln2	1	2	1	4	0.5
DOX17againstowncontroln2	CLCN2	4	132054	5	484438	0.10557	0.992606	CLCN2	DOX17againstowncontroln2	1	3	0	1	0.8
DOX17againstowncontroln2	CNGA1	4	132054	5	484438	0.10557	0.992606	CNGA1	DOX17againstowncontroln2	0	4	0	1	0.8
DOX17againstowncontroln2	CRELD1	4	132054	5	484438	0.10557	0.992606	CRELD1	DOX17againstowncontroln2	2	0	2	1	0.8
DOX17againstowncontroln2	DCAF13	4	132054	5	484438	0.10557	0.992606	DCAF13	DOX17againstowncontroln2	1	3	0	1	0.8
DOX17againstowncontroln2	DGCR14	4	132054	5	484438	0.10557	0.992606	DGCR14	DOX17againstowncontroln2	2	2	0	1	0.8
DOX17againstowncontroln2	ERLIN2	4	132054	5	484438	0.10557	0.992606	ERLIN2	DOX17againstowncontroln2	2	1	1	0	1
DOX17againstowncontroln2	FES	4	132054	5	484438	0.10557	0.992606	FES	DOX17againstowncontroln2	2	2	0	3	0.571429
DOX17againstowncontroln2	FMO2	4	132054	5	484438	0.10557	0.992606	FMO2	DOX17againstowncontroln2	2	0	2	0	1
DOX17againstowncontroln2	GUCY1B3	4	132054	5	484438	0.10557	0.992606	GUCY1B3	DOX17againstowncontroln2	2	2	0	3	0.571429
DOX17againstowncontroln2	H2AFX	4	132054	5	484438	0.10557	0.992606	H2AFX	DOX17againstowncontroln2	1	0	3	0	1
DOX17againstowncontroln2	INHBC	4	132054	5	484438	0.10557	0.992606	INHBC	DOX17againstowncontroln2	0	4	0	1	0.8
DOX17againstowncontroln2	LSG1	4	132054	5	484438	0.10557	0.992606	LSG1	DOX17againstowncontroln2	0	4	0	0	1
DOX17againstowncontroln2	LXN	4	132054	5	484438	0.10557	0.992606	LXN	DOX17againstowncontroln2	1	2	1	2	0.666667
DOX17againstowncontroln2	NACC1	4	132054	5	484438	0.10557	0.992606	NACC1	DOX17againstowncontroln2	0	4	0	1	0.8
DOX17againstowncontroln2	NAMPT	4	132054	5	484438	0.10557	0.992606	NAMPT	DOX17againstowncontroln2	1	3	0	2	0.666667
DOX17againstowncontroln2	NGEF	4	132054	5	484438	0.10557	0.992606	NGEF	DOX17againstowncontroln2	0	4	0	0	1
DOX17againstowncontroln2	PLIN3	4	132054	5	484438	0.10557	0.992606	PLIN3	DOX17againstowncontroln2	0	4	0	3	0.571429
DOX17againstowncontroln2	PPARD	4	132054	5	484438	0.10557	0.992606	PPARD	DOX17againstowncontroln2	0	4	0	3	0.571429
DOX17againstowncontroln2	RCBTB1	4	132054	5	484438	0.10557	0.992606	RCBTB1	DOX17againstowncontroln2	0	4	0	1	0.8
DOX17againstowncontroln2	RET	4	132054	5	484438	0.10557	0.992606	RET	DOX17againstowncontroln2	0	2	2	0	1
DOX17againstowncontroln2	RPS2P32	4	132054	5	484438	0.10557	0.992606	RPS2P32	DOX17againstowncontroln2	3	0	1	0	1
DOX17againstowncontroln2	S100A13	4	132054	5	484438	0.10557	0.992606	S100A13	DOX17againstowncontroln2	0	2	2	3	0.571429
DOX17againstowncontroln2	SMUG1	4	132054	5	484438	0.10557	0.992606	SMUG1	DOX17againstowncontroln2	0	4	0	1	0.8
DOX17againstowncontroln2	SNHG9	4	132054	5	484438	0.10557	0.992606	SNHG9	DOX17againstowncontroln2	3	0	1	0	1
DOX17againstowncontroln2	SOX18	4	132054	5	484438	0.10557	0.992606	SOX18	DOX17againstowncontroln2	1	0	3	0	1
DOX17againstowncontroln2	TMEM177	4	132054	5	484438	0.10557	0.992606	TMEM177	DOX17againstowncontroln2	0	3	1	1	0.8
DOX17againstowncontroln2	TREX1	4	132054	5	484438	0.10557	0.992606	TREX1	DOX17againstowncontroln2	3	0	1	0	1
DOX17againstowncontroln2	ZNF389	4	132054	5	484438	0.10557	0.992606	ZNF389	DOX17againstowncontroln2	1	3	0	1	0.8
DOX17againstowncontroln2	C12orf51	34	132054	95	484438	0.105832	0.992606	C12orf51	DOX17againstowncontroln2	3	31	0	26	0.566667
DOX17againstowncontroln2	KIAA1328	52	132054	154	484438	0.106739	0.992606	KIAA1328	DOX17againstowncontroln2	2	50	0	42	0.553191
DOX17againstowncontroln2	CDKN2A	22	132054	57	484438	0.106892	0.992606	CDKN2A	DOX17againstowncontroln2	0	21	1	15	0.594595
DOX17againstowncontroln2	NR2F2	22	132054	57	484438	0.106892	0.992606	NR2F2	DOX17againstowncontroln2	7	10	5	8	0.733333
DOX17againstowncontroln2	AGPAT6	6	132054	10	484438	0.107228	0.992606	AGPAT6	DOX17againstowncontroln2	0	6	0	4	0.6
DOX17againstowncontroln2	ATG16L2	6	132054	10	484438	0.107228	0.992606	ATG16L2	DOX17againstowncontroln2	0	6	0	2	0.75
DOX17againstowncontroln2	BMP1	6	132054	10	484438	0.107228	0.992606	BMP1	DOX17againstowncontroln2	2	3	1	4	0.6
DOX17againstowncontroln2	C14orf153	6	132054	10	484438	0.107228	0.992606	C14orf153	DOX17againstowncontroln2	0	6	0	7	0.461538
DOX17againstowncontroln2	C7orf25	6	132054	10	484438	0.107228	0.992606	C7orf25	DOX17againstowncontroln2	3	2	1	1	0.857143
DOX17againstowncontroln2	C8orf41	6	132054	10	484438	0.107228	0.992606	C8orf41	DOX17againstowncontroln2	2	0	4	2	0.75
DOX17againstowncontroln2	CDC42EP2	6	132054	10	484438	0.107228	0.992606	CDC42EP2	DOX17againstowncontroln2	0	6	0	3	0.666667
DOX17againstowncontroln2	CDKL1	6	132054	10	484438	0.107228	0.992606	CDKL1	DOX17againstowncontroln2	3	3	0	3	0.666667
DOX17againstowncontroln2	CELF4	6	132054	10	484438	0.107228	0.992606	CELF4	DOX17againstowncontroln2	0	6	0	3	0.666667
DOX17againstowncontroln2	CEMP1	6	132054	10	484438	0.107228	0.992606	CEMP1	DOX17againstowncontroln2	2	0	4	0	1
DOX17againstowncontroln2	DENND4C	6	132054	10	484438	0.107228	0.992606	DENND4C	DOX17againstowncontroln2	1	5	0	2	0.75
DOX17againstowncontroln2	DLGAP5	6	132054	10	484438	0.107228	0.992606	DLGAP5	DOX17againstowncontroln2	0	6	0	1	0.857143
DOX17againstowncontroln2	ERAP1	6	132054	10	484438	0.107228	0.992606	ERAP1	DOX17againstowncontroln2	1	3	2	3	0.666667
DOX17againstowncontroln2	GALNT9	6	132054	10	484438	0.107228	0.992606	GALNT9	DOX17againstowncontroln2	0	6	0	0	1
DOX17againstowncontroln2	GPATCH2	6	132054	10	484438	0.107228	0.992606	GPATCH2	DOX17againstowncontroln2	0	6	0	3	0.666667
DOX17againstowncontroln2	GTSE1	6	132054	10	484438	0.107228	0.992606	GTSE1	DOX17againstowncontroln2	0	6	0	3	0.666667
DOX17againstowncontroln2	HNRNPU	6	132054	10	484438	0.107228	0.992606	HNRNPU	DOX17againstowncontroln2	1	0	5	0	1
DOX17againstowncontroln2	IL17RB	6	132054	10	484438	0.107228	0.992606	IL17RB	DOX17againstowncontroln2	0	6	0	2	0.75
DOX17againstowncontroln2	ITPR1	6	132054	10	484438	0.107228	0.992606	ITPR1	DOX17againstowncontroln2	0	6	0	4	0.6
DOX17againstowncontroln2	ITPRIPL1	6	132054	10	484438	0.107228	0.992606	ITPRIPL1	DOX17againstowncontroln2	4	2	0	3	0.666667
DOX17againstowncontroln2	MTAP	6	132054	10	484438	0.107228	0.992606	MTAP	DOX17againstowncontroln2	0	6	0	0	1
DOX17againstowncontroln2	NCK2	6	132054	10	484438	0.107228	0.992606	NCK2	DOX17againstowncontroln2	0	6	0	2	0.75
DOX17againstowncontroln2	NFATC1	6	132054	10	484438	0.107228	0.992606	NFATC1	DOX17againstowncontroln2	0	6	0	4	0.6
DOX17againstowncontroln2	OBSL1	6	132054	10	484438	0.107228	0.992606	OBSL1	DOX17againstowncontroln2	2	1	3	0	1
DOX17againstowncontroln2	OTUD1	6	132054	10	484438	0.107228	0.992606	OTUD1	DOX17againstowncontroln2	2	0	4	0	1
DOX17againstowncontroln2	PCDHGA1	6	132054	10	484438	0.107228	0.992606	PCDHGA1	DOX17againstowncontroln2	0	5	1	2	0.75
DOX17againstowncontroln2	PHACTR2	6	132054	10	484438	0.107228	0.992606	PHACTR2	DOX17againstowncontroln2	0	6	0	5	0.545455
DOX17againstowncontroln2	POLR3G	6	132054	10	484438	0.107228	0.992606	POLR3G	DOX17againstowncontroln2	2	4	0	1	0.857143
DOX17againstowncontroln2	PURB	6	132054	10	484438	0.107228	0.992606	PURB	DOX17againstowncontroln2	5	0	1	0	1
DOX17againstowncontroln2	STX6	6	132054	10	484438	0.107228	0.992606	STX6	DOX17againstowncontroln2	0	1	5	1	0.857143
DOX17againstowncontroln2	TARBP1	6	132054	10	484438	0.107228	0.992606	TARBP1	DOX17againstowncontroln2	0	4	2	3	0.666667
DOX17againstowncontroln2	TIGD1	6	132054	10	484438	0.107228	0.992606	TIGD1	DOX17againstowncontroln2	3	0	3	0	1
DOX17againstowncontroln2	TMEM128	6	132054	10	484438	0.107228	0.992606	TMEM128	DOX17againstowncontroln2	4	0	2	2	0.75
DOX17againstowncontroln2	UCKL1	6	132054	10	484438	0.107228	0.992606	UCKL1	DOX17againstowncontroln2	2	4	0	3	0.666667
DOX17againstowncontroln2	USP54	6	132054	10	484438	0.107228	0.992606	USP54	DOX17againstowncontroln2	1	5	0	1	0.857143
DOX17againstowncontroln2	NMRAL1	21	132054	54	484438	0.108203	0.992606	NMRAL1	DOX17againstowncontroln2	4	8	9	10	0.677419
DOX17againstowncontroln2	RREB1	21	132054	54	484438	0.108203	0.992606	RREB1	DOX17againstowncontroln2	0	20	1	13	0.617647
DOX17againstowncontroln2	AXL	10	132054	21	484438	0.108388	0.992606	AXL	DOX17againstowncontroln2	0	9	1	6	0.625
DOX17againstowncontroln2	BPTF	10	132054	21	484438	0.108388	0.992606	BPTF	DOX17againstowncontroln2	1	5	4	5	0.666667
DOX17againstowncontroln2	CD97	10	132054	21	484438	0.108388	0.992606	CD97	DOX17againstowncontroln2	1	9	0	4	0.714286
DOX17againstowncontroln2	ESRRA	10	132054	21	484438	0.108388	0.992606	ESRRA	DOX17againstowncontroln2	1	9	0	6	0.625
DOX17againstowncontroln2	HBQ1	10	132054	21	484438	0.108388	0.992606	HBQ1	DOX17againstowncontroln2	5	4	1	0	1
DOX17againstowncontroln2	MTIF3	10	132054	21	484438	0.108388	0.992606	MTIF3	DOX17againstowncontroln2	0	10	0	5	0.666667
DOX17againstowncontroln2	PACSIN2	10	132054	21	484438	0.108388	0.992606	PACSIN2	DOX17againstowncontroln2	0	10	0	9	0.526316
DOX17againstowncontroln2	SAPS1	10	132054	21	484438	0.108388	0.992606	SAPS1	DOX17againstowncontroln2	0	9	1	4	0.714286
DOX17againstowncontroln2	FKBP10	20	132054	51	484438	0.109435	0.992606	FKBP10	DOX17againstowncontroln2	5	11	4	12	0.625
DOX17againstowncontroln2	LHX1	20	132054	51	484438	0.109435	0.992606	LHX1	DOX17againstowncontroln2	8	9	3	7	0.740741
DOX17againstowncontroln2	DICER1	19	132054	48	484438	0.110565	0.992606	DICER1	DOX17againstowncontroln2	1	18	0	7	0.730769
DOX17againstowncontroln2	PDXK	19	132054	48	484438	0.110565	0.992606	PDXK	DOX17againstowncontroln2	0	18	1	15	0.558824
DOX17againstowncontroln2	EGFLAM	11	132054	24	484438	0.110807	0.992606	EGFLAM	DOX17againstowncontroln2	0	11	0	10	0.52381
DOX17againstowncontroln2	PELO	11	132054	24	484438	0.110807	0.992606	PELO	DOX17againstowncontroln2	3	4	4	1	0.916667
DOX17againstowncontroln2	PLCB3	11	132054	24	484438	0.110807	0.992606	PLCB3	DOX17againstowncontroln2	5	5	1	2	0.846154
DOX17againstowncontroln2	STC2	11	132054	24	484438	0.110807	0.992606	STC2	DOX17againstowncontroln2	2	2	7	1	0.916667
DOX17againstowncontroln2	SHROOM3	76	132054	235	484438	0.110959	0.992606	SHROOM3	DOX17againstowncontroln2	10	60	6	56	0.575758
DOX17againstowncontroln2	CATSPERB	53	132054	158	484438	0.111563	0.992606	CATSPERB	DOX17againstowncontroln2	5	47	1	31	0.630952
DOX17againstowncontroln2	ZNF688	31	132054	86	484438	0.111918	0.992606	ZNF688	DOX17againstowncontroln2	13	11	7	9	0.775
DOX17againstowncontroln2	ABHD12	12	132054	27	484438	0.112337	0.992606	ABHD12	DOX17againstowncontroln2	0	12	0	6	0.666667
DOX17againstowncontroln2	SEC22A	12	132054	27	484438	0.112337	0.992606	SEC22A	DOX17againstowncontroln2	0	12	0	10	0.545455
DOX17againstowncontroln2	SLC25A19	12	132054	27	484438	0.112337	0.992606	SLC25A19	DOX17againstowncontroln2	5	6	1	7	0.631579
DOX17againstowncontroln2	ANO4	17	132054	42	484438	0.112414	0.992606	ANO4	DOX17againstowncontroln2	0	17	0	13	0.566667
DOX17againstowncontroln2	CECR1	17	132054	42	484438	0.112414	0.992606	CECR1	DOX17againstowncontroln2	0	17	0	12	0.586207
DOX17againstowncontroln2	DSCR3	39	132054	112	484438	0.11258	0.992606	DSCR3	DOX17againstowncontroln2	0	39	0	24	0.619048
DOX17againstowncontroln2	MAP1D	39	132054	112	484438	0.11258	0.992606	MAP1D	DOX17againstowncontroln2	0	39	0	30	0.565217
DOX17againstowncontroln2	NBL1	16	132054	39	484438	0.113058	0.992606	NBL1	DOX17againstowncontroln2	1	14	1	12	0.571429
DOX17againstowncontroln2	GPATCH4	13	132054	30	484438	0.113191	0.992606	GPATCH4	DOX17againstowncontroln2	0	13	0	9	0.590909
DOX17againstowncontroln2	GYS1	13	132054	30	484438	0.113191	0.992606	GYS1	DOX17againstowncontroln2	4	8	1	2	0.866667
DOX17againstowncontroln2	PCSK5	13	132054	30	484438	0.113191	0.992606	PCSK5	DOX17againstowncontroln2	0	13	0	7	0.65
DOX17againstowncontroln2	PLD6	13	132054	30	484438	0.113191	0.992606	PLD6	DOX17againstowncontroln2	1	10	2	6	0.684211
DOX17againstowncontroln2	PMP22	13	132054	30	484438	0.113191	0.992606	PMP22	DOX17againstowncontroln2	0	13	0	17	0.433333
DOX17againstowncontroln2	PPCDC	25	132054	67	484438	0.113425	0.992606	PPCDC	DOX17againstowncontroln2	0	25	0	28	0.471698
DOX17againstowncontroln2	AGTR1	15	132054	36	484438	0.11345	0.992606	AGTR1	DOX17againstowncontroln2	5	5	5	1	0.9375
DOX17againstowncontroln2	IFIT3	15	132054	36	484438	0.11345	0.992606	IFIT3	DOX17againstowncontroln2	3	9	3	5	0.75
DOX17againstowncontroln2	KIAA0776	15	132054	36	484438	0.11345	0.992606	KIAA0776	DOX17againstowncontroln2	2	11	2	6	0.714286
DOX17againstowncontroln2	SLC29A1	15	132054	36	484438	0.11345	0.992606	SLC29A1	DOX17againstowncontroln2	1	11	3	5	0.75
DOX17againstowncontroln2	C14orf104	14	132054	33	484438	0.113524	0.992606	C14orf104	DOX17againstowncontroln2	5	1	8	1	0.933333
DOX17againstowncontroln2	PAX5	14	132054	33	484438	0.113524	0.992606	PAX5	DOX17againstowncontroln2	0	14	0	15	0.482759
DOX17againstowncontroln2	PHF19	14	132054	33	484438	0.113524	0.992606	PHF19	DOX17againstowncontroln2	0	13	1	8	0.636364
DOX17againstowncontroln2	TGFB1	14	132054	33	484438	0.113524	0.992606	TGFB1	DOX17againstowncontroln2	1	11	2	5	0.736842
DOX17againstowncontroln2	AKT1S1	30	132054	83	484438	0.114011	0.992606	AKT1S1	DOX17againstowncontroln2	8	15	7	12	0.714286
DOX17againstowncontroln2	EDIL3	30	132054	83	484438	0.114011	0.992606	EDIL3	DOX17againstowncontroln2	0	30	0	21	0.588235
DOX17againstowncontroln2	TMEM143	30	132054	83	484438	0.114011	0.992606	TMEM143	DOX17againstowncontroln2	5	18	7	17	0.638298
DOX17againstowncontroln2	ANP32B	24	132054	64	484438	0.115257	0.992606	ANP32B	DOX17againstowncontroln2	1	22	1	19	0.55814
DOX17againstowncontroln2	BAZ1A	24	132054	64	484438	0.115257	0.992606	BAZ1A	DOX17againstowncontroln2	2	18	4	13	0.648649
DOX17againstowncontroln2	CA11	24	132054	64	484438	0.115257	0.992606	CA11	DOX17againstowncontroln2	8	3	13	4	0.857143
DOX17againstowncontroln2	FBXO17	24	132054	64	484438	0.115257	0.992606	FBXO17	DOX17againstowncontroln2	0	21	3	21	0.533333
DOX17againstowncontroln2	AGRP	7	132054	13	484438	0.11647	0.992606	AGRP	DOX17againstowncontroln2	3	2	2	0	1
DOX17againstowncontroln2	ARFGEF1	7	132054	13	484438	0.11647	0.992606	ARFGEF1	DOX17againstowncontroln2	0	6	1	4	0.636364
DOX17againstowncontroln2	ARL5B	7	132054	13	484438	0.11647	0.992606	ARL5B	DOX17againstowncontroln2	0	7	0	3	0.7
DOX17againstowncontroln2	C14orf4	7	132054	13	484438	0.11647	0.992606	C14orf4	DOX17againstowncontroln2	3	0	4	0	1
DOX17againstowncontroln2	DSE	7	132054	13	484438	0.11647	0.992606	DSE	DOX17againstowncontroln2	0	7	0	0	1
DOX17againstowncontroln2	ENTPD4	7	132054	13	484438	0.11647	0.992606	ENTPD4	DOX17againstowncontroln2	0	7	0	6	0.538462
DOX17againstowncontroln2	FAM119B	7	132054	13	484438	0.11647	0.992606	FAM119B	DOX17againstowncontroln2	1	4	2	4	0.636364
DOX17againstowncontroln2	FLJ30679	7	132054	13	484438	0.11647	0.992606	FLJ30679	DOX17againstowncontroln2	4	0	3	0	1
DOX17againstowncontroln2	GCNT2	7	132054	13	484438	0.11647	0.992606	GCNT2	DOX17againstowncontroln2	1	5	1	8	0.466667
DOX17againstowncontroln2	LEPREL2	7	132054	13	484438	0.11647	0.992606	LEPREL2	DOX17againstowncontroln2	2	4	1	1	0.875
DOX17againstowncontroln2	LRRIQ3	7	132054	13	484438	0.11647	0.992606	LRRIQ3	DOX17againstowncontroln2	0	7	0	1	0.875
DOX17againstowncontroln2	MATN2	7	132054	13	484438	0.11647	0.992606	MATN2	DOX17againstowncontroln2	1	6	0	6	0.538462
DOX17againstowncontroln2	MIR17HG	7	132054	13	484438	0.11647	0.992606	MIR17HG	DOX17againstowncontroln2	1	3	3	0	1
DOX17againstowncontroln2	MRGPRF	7	132054	13	484438	0.11647	0.992606	MRGPRF	DOX17againstowncontroln2	0	6	1	3	0.7
DOX17againstowncontroln2	MYBL2	7	132054	13	484438	0.11647	0.992606	MYBL2	DOX17againstowncontroln2	2	4	1	8	0.466667
DOX17againstowncontroln2	SUPT7L	7	132054	13	484438	0.11647	0.992606	SUPT7L	DOX17againstowncontroln2	2	4	1	1	0.875
DOX17againstowncontroln2	TEP1	7	132054	13	484438	0.11647	0.992606	TEP1	DOX17againstowncontroln2	0	7	0	8	0.466667
DOX17againstowncontroln2	TMEM20	7	132054	13	484438	0.11647	0.992606	TMEM20	DOX17againstowncontroln2	0	7	0	1	0.875
DOX17againstowncontroln2	TRIM26	7	132054	13	484438	0.11647	0.992606	TRIM26	DOX17againstowncontroln2	0	7	0	1	0.875
DOX17againstowncontroln2	ZNF365	7	132054	13	484438	0.11647	0.992606	ZNF365	DOX17againstowncontroln2	0	7	0	2	0.777778
DOX17againstowncontroln2	APEH	3	132054	3	484438	0.117099	0.992606	APEH	DOX17againstowncontroln2	1	2	0	1	0.75
DOX17againstowncontroln2	BEND7	3	132054	3	484438	0.117099	0.992606	BEND7	DOX17againstowncontroln2	0	3	0	4	0.428571
DOX17againstowncontroln2	BLID	3	132054	3	484438	0.117099	0.992606	BLID	DOX17againstowncontroln2	3	0	0	0	1
DOX17againstowncontroln2	C13orf31	3	132054	3	484438	0.117099	0.992606	C13orf31	DOX17againstowncontroln2	0	1	2	1	0.75
DOX17againstowncontroln2	C1orf103	3	132054	3	484438	0.117099	0.992606	C1orf103	DOX17againstowncontroln2	1	2	0	2	0.6
DOX17againstowncontroln2	C20orf201	3	132054	3	484438	0.117099	0.992606	C20orf201	DOX17againstowncontroln2	1	0	2	0	1
DOX17againstowncontroln2	C20orf27	3	132054	3	484438	0.117099	0.992606	C20orf27	DOX17againstowncontroln2	0	3	0	4	0.428571
DOX17againstowncontroln2	C2orf89	3	132054	3	484438	0.117099	0.992606	C2orf89	DOX17againstowncontroln2	0	3	0	1	0.75
DOX17againstowncontroln2	CAV1	3	132054	3	484438	0.117099	0.992606	CAV1	DOX17againstowncontroln2	2	1	0	1	0.75
DOX17againstowncontroln2	CCNYL1	3	132054	3	484438	0.117099	0.992606	CCNYL1	DOX17againstowncontroln2	0	3	0	0	1
DOX17againstowncontroln2	CH25H	3	132054	3	484438	0.117099	0.992606	CH25H	DOX17againstowncontroln2	2	0	1	0	1
DOX17againstowncontroln2	CST3	3	132054	3	484438	0.117099	0.992606	CST3	DOX17againstowncontroln2	0	3	0	0	1
DOX17againstowncontroln2	DCAF11	3	132054	3	484438	0.117099	0.992606	DCAF11	DOX17againstowncontroln2	2	0	1	0	1
DOX17againstowncontroln2	DGCR6	3	132054	3	484438	0.117099	0.992606	DGCR6	DOX17againstowncontroln2	1	2	0	1	0.75
DOX17againstowncontroln2	DPPA2	3	132054	3	484438	0.117099	0.992606	DPPA2	DOX17againstowncontroln2	0	3	0	2	0.6
DOX17againstowncontroln2	ENTPD7	3	132054	3	484438	0.117099	0.992606	ENTPD7	DOX17againstowncontroln2	0	3	0	1	0.75
DOX17againstowncontroln2	ESRRB	3	132054	3	484438	0.117099	0.992606	ESRRB	DOX17againstowncontroln2	0	3	0	1	0.75
DOX17againstowncontroln2	FAM149A	3	132054	3	484438	0.117099	0.992606	FAM149A	DOX17againstowncontroln2	0	2	1	3	0.5
DOX17againstowncontroln2	FAM58A	3	132054	3	484438	0.117099	0.992606	FAM58A	DOX17againstowncontroln2	0	3	0	0	1
DOX17againstowncontroln2	FBXL3	3	132054	3	484438	0.117099	0.992606	FBXL3	DOX17againstowncontroln2	1	2	0	0	1
DOX17againstowncontroln2	FGFR1OP2	3	132054	3	484438	0.117099	0.992606	FGFR1OP2	DOX17againstowncontroln2	0	3	0	1	0.75
DOX17againstowncontroln2	FLJ39609	3	132054	3	484438	0.117099	0.992606	FLJ39609	DOX17againstowncontroln2	0	2	1	0	1
DOX17againstowncontroln2	FUCA1	3	132054	3	484438	0.117099	0.992606	FUCA1	DOX17againstowncontroln2	1	1	1	1	0.75
DOX17againstowncontroln2	GMIP	3	132054	3	484438	0.117099	0.992606	GMIP	DOX17againstowncontroln2	0	2	1	0	1
DOX17againstowncontroln2	GNS	3	132054	3	484438	0.117099	0.992606	GNS	DOX17againstowncontroln2	0	3	0	0	1
DOX17againstowncontroln2	IL17RA	3	132054	3	484438	0.117099	0.992606	IL17RA	DOX17againstowncontroln2	0	3	0	1	0.75
DOX17againstowncontroln2	KCNJ6	3	132054	3	484438	0.117099	0.992606	KCNJ6	DOX17againstowncontroln2	0	3	0	1	0.75
DOX17againstowncontroln2	LOC283867	3	132054	3	484438	0.117099	0.992606	LOC283867	DOX17againstowncontroln2	0	3	0	0	1
DOX17againstowncontroln2	LOC284440	3	132054	3	484438	0.117099	0.992606	LOC284440	DOX17againstowncontroln2	0	3	0	3	0.5
DOX17againstowncontroln2	LOC285735	3	132054	3	484438	0.117099	0.992606	LOC285735	DOX17againstowncontroln2	0	3	0	1	0.75
DOX17againstowncontroln2	MAGEE1	3	132054	3	484438	0.117099	0.992606	MAGEE1	DOX17againstowncontroln2	3	0	0	0	1
DOX17againstowncontroln2	MFAP3	3	132054	3	484438	0.117099	0.992606	MFAP3	DOX17againstowncontroln2	1	2	0	2	0.6
DOX17againstowncontroln2	MFSD9	3	132054	3	484438	0.117099	0.992606	MFSD9	DOX17againstowncontroln2	0	3	0	0	1
DOX17againstowncontroln2	NTAN1	3	132054	3	484438	0.117099	0.992606	NTAN1	DOX17againstowncontroln2	0	3	0	3	0.5
DOX17againstowncontroln2	PABPC1	3	132054	3	484438	0.117099	0.992606	PABPC1	DOX17againstowncontroln2	0	2	1	1	0.75
DOX17againstowncontroln2	PARM1	3	132054	3	484438	0.117099	0.992606	PARM1	DOX17againstowncontroln2	0	3	0	1	0.75
DOX17againstowncontroln2	PCDH20	3	132054	3	484438	0.117099	0.992606	PCDH20	DOX17againstowncontroln2	1	1	1	0	1
DOX17againstowncontroln2	PDCD10	3	132054	3	484438	0.117099	0.992606	PDCD10	DOX17againstowncontroln2	0	3	0	0	1
DOX17againstowncontroln2	PDGFRB	3	132054	3	484438	0.117099	0.992606	PDGFRB	DOX17againstowncontroln2	0	3	0	2	0.6
DOX17againstowncontroln2	RALB	3	132054	3	484438	0.117099	0.992606	RALB	DOX17againstowncontroln2	0	2	1	1	0.75
DOX17againstowncontroln2	RASGRP3	3	132054	3	484438	0.117099	0.992606	RASGRP3	DOX17againstowncontroln2	0	3	0	1	0.75
DOX17againstowncontroln2	ROS1	3	132054	3	484438	0.117099	0.992606	ROS1	DOX17againstowncontroln2	0	2	1	3	0.5
DOX17againstowncontroln2	RPS9	3	132054	3	484438	0.117099	0.992606	RPS9	DOX17againstowncontroln2	0	3	0	3	0.5
DOX17againstowncontroln2	SCN2A	3	132054	3	484438	0.117099	0.992606	SCN2A	DOX17againstowncontroln2	1	2	0	0	1
DOX17againstowncontroln2	SNORD42B	3	132054	3	484438	0.117099	0.992606	SNORD42B	DOX17againstowncontroln2	2	0	1	0	1
DOX17againstowncontroln2	SNORD48	3	132054	3	484438	0.117099	0.992606	SNORD48	DOX17againstowncontroln2	1	0	2	0	1
DOX17againstowncontroln2	TGFB3	3	132054	3	484438	0.117099	0.992606	TGFB3	DOX17againstowncontroln2	1	0	2	0	1
DOX17againstowncontroln2	TMED9	3	132054	3	484438	0.117099	0.992606	TMED9	DOX17againstowncontroln2	2	1	0	3	0.5
DOX17againstowncontroln2	TP53I11	3	132054	3	484438	0.117099	0.992606	TP53I11	DOX17againstowncontroln2	0	3	0	2	0.6
DOX17againstowncontroln2	VASH1	3	132054	3	484438	0.117099	0.992606	VASH1	DOX17againstowncontroln2	1	0	2	1	0.75
DOX17againstowncontroln2	WDR46	3	132054	3	484438	0.117099	0.992606	WDR46	DOX17againstowncontroln2	2	0	1	2	0.6
DOX17againstowncontroln2	WDR6	3	132054	3	484438	0.117099	0.992606	WDR6	DOX17againstowncontroln2	1	2	0	2	0.6
DOX17againstowncontroln2	ZFAND2A	3	132054	3	484438	0.117099	0.992606	ZFAND2A	DOX17againstowncontroln2	0	3	0	2	0.6
DOX17againstowncontroln2	ZKSCAN4	3	132054	3	484438	0.117099	0.992606	ZKSCAN4	DOX17againstowncontroln2	2	0	1	0	1
DOX17againstowncontroln2	ZNF221	3	132054	3	484438	0.117099	0.992606	ZNF221	DOX17againstowncontroln2	0	3	0	1	0.75
DOX17againstowncontroln2	CA5B	33	132054	93	484438	0.117214	0.992606	CA5B	DOX17againstowncontroln2	2	30	1	27	0.55
DOX17againstowncontroln2	AACS	2	132054	1	484438	0.117993	0.992606	AACS	DOX17againstowncontroln2	0	1	1	1	0.666667
DOX17againstowncontroln2	ACTB	2	132054	1	484438	0.117993	0.992606	ACTB	DOX17againstowncontroln2	0	1	1	0	1
DOX17againstowncontroln2	AMICA1	2	132054	1	484438	0.117993	0.992606	AMICA1	DOX17againstowncontroln2	0	1	1	1	0.666667
DOX17againstowncontroln2	ANTXRL	2	132054	1	484438	0.117993	0.992606	ANTXRL	DOX17againstowncontroln2	0	2	0	2	0.5
DOX17againstowncontroln2	ANXA13	2	132054	1	484438	0.117993	0.992606	ANXA13	DOX17againstowncontroln2	0	2	0	1	0.666667
DOX17againstowncontroln2	BRD4	2	132054	1	484438	0.117993	0.992606	BRD4	DOX17againstowncontroln2	0	2	0	0	1
DOX17againstowncontroln2	C10orf113	2	132054	1	484438	0.117993	0.992606	C10orf113	DOX17againstowncontroln2	0	2	0	0	1
DOX17againstowncontroln2	C10orf99	2	132054	1	484438	0.117993	0.992606	C10orf99	DOX17againstowncontroln2	0	2	0	1	0.666667
DOX17againstowncontroln2	C12orf34	2	132054	1	484438	0.117993	0.992606	C12orf34	DOX17againstowncontroln2	1	1	0	0	1
DOX17againstowncontroln2	C13orf28	2	132054	1	484438	0.117993	0.992606	C13orf28	DOX17againstowncontroln2	0	2	0	0	1
DOX17againstowncontroln2	C14orf21	2	132054	1	484438	0.117993	0.992606	C14orf21	DOX17againstowncontroln2	0	2	0	0	1
DOX17againstowncontroln2	C1orf14	2	132054	1	484438	0.117993	0.992606	C1orf14	DOX17againstowncontroln2	0	2	0	1	0.666667
DOX17againstowncontroln2	C1orf170	2	132054	1	484438	0.117993	0.992606	C1orf170	DOX17againstowncontroln2	0	1	1	0	1
DOX17againstowncontroln2	C2orf48	2	132054	1	484438	0.117993	0.992606	C2orf48	DOX17againstowncontroln2	0	2	0	1	0.666667
DOX17againstowncontroln2	C9orf129	2	132054	1	484438	0.117993	0.992606	C9orf129	DOX17againstowncontroln2	0	2	0	1	0.666667
DOX17againstowncontroln2	CCDC127	2	132054	1	484438	0.117993	0.992606	CCDC127	DOX17againstowncontroln2	0	2	0	1	0.666667
DOX17againstowncontroln2	CDAN1	2	132054	1	484438	0.117993	0.992606	CDAN1	DOX17againstowncontroln2	0	0	2	0	1
DOX17againstowncontroln2	CENPB	2	132054	1	484438	0.117993	0.992606	CENPB	DOX17againstowncontroln2	1	0	1	0	1
DOX17againstowncontroln2	CHML	2	132054	1	484438	0.117993	0.992606	CHML	DOX17againstowncontroln2	0	0	2	0	1
DOX17againstowncontroln2	COX7A2	2	132054	1	484438	0.117993	0.992606	COX7A2	DOX17againstowncontroln2	0	2	0	2	0.5
DOX17againstowncontroln2	CRTAC1	2	132054	1	484438	0.117993	0.992606	CRTAC1	DOX17againstowncontroln2	0	2	0	0	1
DOX17againstowncontroln2	CSN1S2B	2	132054	1	484438	0.117993	0.992606	CSN1S2B	DOX17againstowncontroln2	0	2	0	0	1
DOX17againstowncontroln2	CSTF2T	2	132054	1	484438	0.117993	0.992606	CSTF2T	DOX17againstowncontroln2	1	0	1	0	1
DOX17againstowncontroln2	DNAJB2	2	132054	1	484438	0.117993	0.992606	DNAJB2	DOX17againstowncontroln2	1	1	0	0	1
DOX17againstowncontroln2	DPYSL4	2	132054	1	484438	0.117993	0.992606	DPYSL4	DOX17againstowncontroln2	0	2	0	1	0.666667
DOX17againstowncontroln2	DRD4	2	132054	1	484438	0.117993	0.992606	DRD4	DOX17againstowncontroln2	0	2	0	0	1
DOX17againstowncontroln2	DTHD1	2	132054	1	484438	0.117993	0.992606	DTHD1	DOX17againstowncontroln2	0	2	0	0	1
DOX17againstowncontroln2	DUSP18	2	132054	1	484438	0.117993	0.992606	DUSP18	DOX17againstowncontroln2	0	1	1	0	1
DOX17againstowncontroln2	ELOVL7	2	132054	1	484438	0.117993	0.992606	ELOVL7	DOX17againstowncontroln2	0	2	0	1	0.666667
DOX17againstowncontroln2	FAM154A	2	132054	1	484438	0.117993	0.992606	FAM154A	DOX17againstowncontroln2	0	2	0	0	1
DOX17againstowncontroln2	FAM167A	2	132054	1	484438	0.117993	0.992606	FAM167A	DOX17againstowncontroln2	1	1	0	0	1
DOX17againstowncontroln2	FAM173A	2	132054	1	484438	0.117993	0.992606	FAM173A	DOX17againstowncontroln2	0	2	0	0	1
DOX17againstowncontroln2	G6PC2	2	132054	1	484438	0.117993	0.992606	G6PC2	DOX17againstowncontroln2	1	1	0	1	0.666667
DOX17againstowncontroln2	GC	2	132054	1	484438	0.117993	0.992606	GC	DOX17againstowncontroln2	0	2	0	1	0.666667
DOX17againstowncontroln2	GJB2	2	132054	1	484438	0.117993	0.992606	GJB2	DOX17againstowncontroln2	0	2	0	2	0.5
DOX17againstowncontroln2	GLIPR1	2	132054	1	484438	0.117993	0.992606	GLIPR1	DOX17againstowncontroln2	0	0	2	2	0.5
DOX17againstowncontroln2	GPR39	2	132054	1	484438	0.117993	0.992606	GPR39	DOX17againstowncontroln2	0	2	0	0	1
DOX17againstowncontroln2	GPX4	2	132054	1	484438	0.117993	0.992606	GPX4	DOX17againstowncontroln2	1	0	1	0	1
DOX17againstowncontroln2	GRIN2B	2	132054	1	484438	0.117993	0.992606	GRIN2B	DOX17againstowncontroln2	0	2	0	0	1
DOX17againstowncontroln2	GSTK1	2	132054	1	484438	0.117993	0.992606	GSTK1	DOX17againstowncontroln2	0	2	0	1	0.666667
DOX17againstowncontroln2	HNF4A	2	132054	1	484438	0.117993	0.992606	HNF4A	DOX17againstowncontroln2	0	2	0	1	0.666667
DOX17againstowncontroln2	HPCA	2	132054	1	484438	0.117993	0.992606	HPCA	DOX17againstowncontroln2	0	0	2	0	1
DOX17againstowncontroln2	HSPB7	2	132054	1	484438	0.117993	0.992606	HSPB7	DOX17againstowncontroln2	2	0	0	0	1
DOX17againstowncontroln2	HTR2B	2	132054	1	484438	0.117993	0.992606	HTR2B	DOX17againstowncontroln2	0	2	0	0	1
DOX17againstowncontroln2	ICAM4	2	132054	1	484438	0.117993	0.992606	ICAM4	DOX17againstowncontroln2	0	1	1	0	1
DOX17againstowncontroln2	IDS	2	132054	1	484438	0.117993	0.992606	IDS	DOX17againstowncontroln2	0	2	0	2	0.5
DOX17againstowncontroln2	IFI16	2	132054	1	484438	0.117993	0.992606	IFI16	DOX17againstowncontroln2	1	1	0	1	0.666667
DOX17againstowncontroln2	IGFBP7	2	132054	1	484438	0.117993	0.992606	IGFBP7	DOX17againstowncontroln2	0	2	0	0	1
DOX17againstowncontroln2	IL10RA	2	132054	1	484438	0.117993	0.992606	IL10RA	DOX17againstowncontroln2	0	1	1	1	0.666667
DOX17againstowncontroln2	IL5RA	2	132054	1	484438	0.117993	0.992606	IL5RA	DOX17againstowncontroln2	0	1	1	0	1
DOX17againstowncontroln2	IRX6	2	132054	1	484438	0.117993	0.992606	IRX6	DOX17againstowncontroln2	0	2	0	0	1
DOX17againstowncontroln2	ISG15	2	132054	1	484438	0.117993	0.992606	ISG15	DOX17againstowncontroln2	1	0	1	2	0.5
DOX17againstowncontroln2	KBTBD10	2	132054	1	484438	0.117993	0.992606	KBTBD10	DOX17againstowncontroln2	0	2	0	0	1
DOX17againstowncontroln2	KDSR	2	132054	1	484438	0.117993	0.992606	KDSR	DOX17againstowncontroln2	0	2	0	0	1
DOX17againstowncontroln2	LOC647979	2	132054	1	484438	0.117993	0.992606	LOC647979	DOX17againstowncontroln2	1	0	1	0	1
DOX17againstowncontroln2	LOX	2	132054	1	484438	0.117993	0.992606	LOX	DOX17againstowncontroln2	2	0	0	0	1
DOX17againstowncontroln2	MED19	2	132054	1	484438	0.117993	0.992606	MED19	DOX17againstowncontroln2	0	1	1	0	1
DOX17againstowncontroln2	MYH3	2	132054	1	484438	0.117993	0.992606	MYH3	DOX17againstowncontroln2	0	1	1	0	1
DOX17againstowncontroln2	NCRNA00115	2	132054	1	484438	0.117993	0.992606	NCRNA00115	DOX17againstowncontroln2	1	0	1	0	1
DOX17againstowncontroln2	NDUFAF4	2	132054	1	484438	0.117993	0.992606	NDUFAF4	DOX17againstowncontroln2	0	1	1	0	1
DOX17againstowncontroln2	NENF	2	132054	1	484438	0.117993	0.992606	NENF	DOX17againstowncontroln2	0	2	0	0	1
DOX17againstowncontroln2	NOX4	2	132054	1	484438	0.117993	0.992606	NOX4	DOX17againstowncontroln2	0	2	0	0	1
DOX17againstowncontroln2	NPPC	2	132054	1	484438	0.117993	0.992606	NPPC	DOX17againstowncontroln2	0	2	0	0	1
DOX17againstowncontroln2	OTP	2	132054	1	484438	0.117993	0.992606	OTP	DOX17againstowncontroln2	1	0	1	0	1
DOX17againstowncontroln2	P4HA3	2	132054	1	484438	0.117993	0.992606	P4HA3	DOX17againstowncontroln2	0	2	0	2	0.5
DOX17againstowncontroln2	PGAM2	2	132054	1	484438	0.117993	0.992606	PGAM2	DOX17againstowncontroln2	0	1	1	0	1
DOX17againstowncontroln2	PNLIP	2	132054	1	484438	0.117993	0.992606	PNLIP	DOX17againstowncontroln2	0	1	1	0	1
DOX17againstowncontroln2	PRDM14	2	132054	1	484438	0.117993	0.992606	PRDM14	DOX17againstowncontroln2	0	2	0	0	1
DOX17againstowncontroln2	PREB	2	132054	1	484438	0.117993	0.992606	PREB	DOX17againstowncontroln2	0	2	0	1	0.666667
DOX17againstowncontroln2	PTPN5	2	132054	1	484438	0.117993	0.992606	PTPN5	DOX17againstowncontroln2	1	1	0	0	1
DOX17againstowncontroln2	PTPRT	2	132054	1	484438	0.117993	0.992606	PTPRT	DOX17againstowncontroln2	0	2	0	1	0.666667
DOX17againstowncontroln2	RFXAP	2	132054	1	484438	0.117993	0.992606	RFXAP	DOX17againstowncontroln2	0	2	0	1	0.666667
DOX17againstowncontroln2	RNF31	2	132054	1	484438	0.117993	0.992606	RNF31	DOX17againstowncontroln2	2	0	0	0	1
DOX17againstowncontroln2	SCRT2	2	132054	1	484438	0.117993	0.992606	SCRT2	DOX17againstowncontroln2	1	0	1	0	1
DOX17againstowncontroln2	SERPINI2	2	132054	1	484438	0.117993	0.992606	SERPINI2	DOX17againstowncontroln2	0	2	0	1	0.666667
DOX17againstowncontroln2	SGK494	2	132054	1	484438	0.117993	0.992606	SGK494	DOX17againstowncontroln2	0	1	1	0	1
DOX17againstowncontroln2	SLC24A2	2	132054	1	484438	0.117993	0.992606	SLC24A2	DOX17againstowncontroln2	0	2	0	0	1
DOX17againstowncontroln2	SNORA21	2	132054	1	484438	0.117993	0.992606	SNORA21	DOX17againstowncontroln2	0	0	2	0	1
DOX17againstowncontroln2	SP7	2	132054	1	484438	0.117993	0.992606	SP7	DOX17againstowncontroln2	0	0	2	0	1
DOX17againstowncontroln2	SYT16	2	132054	1	484438	0.117993	0.992606	SYT16	DOX17againstowncontroln2	0	2	0	1	0.666667
DOX17againstowncontroln2	TJP3	2	132054	1	484438	0.117993	0.992606	TJP3	DOX17againstowncontroln2	0	2	0	2	0.5
DOX17againstowncontroln2	TMCO1	2	132054	1	484438	0.117993	0.992606	TMCO1	DOX17againstowncontroln2	1	1	0	0	1
DOX17againstowncontroln2	TMEM151A	2	132054	1	484438	0.117993	0.992606	TMEM151A	DOX17againstowncontroln2	1	1	0	0	1
DOX17againstowncontroln2	TMPRSS7	2	132054	1	484438	0.117993	0.992606	TMPRSS7	DOX17againstowncontroln2	1	1	0	2	0.5
DOX17againstowncontroln2	TNFAIP8L1	2	132054	1	484438	0.117993	0.992606	TNFAIP8L1	DOX17againstowncontroln2	1	0	1	1	0.666667
DOX17againstowncontroln2	TRPC3	2	132054	1	484438	0.117993	0.992606	TRPC3	DOX17againstowncontroln2	0	2	0	0	1
DOX17againstowncontroln2	UBASH3B	2	132054	1	484438	0.117993	0.992606	UBASH3B	DOX17againstowncontroln2	1	0	1	0	1
DOX17againstowncontroln2	ZNF157	2	132054	1	484438	0.117993	0.992606	ZNF157	DOX17againstowncontroln2	0	2	0	0	1
DOX17againstowncontroln2	ZNF37B	2	132054	1	484438	0.117993	0.992606	ZNF37B	DOX17againstowncontroln2	0	1	1	0	1
DOX17againstowncontroln2	ZNF420	2	132054	1	484438	0.117993	0.992606	ZNF420	DOX17againstowncontroln2	0	2	0	1	0.666667
DOX17againstowncontroln2	ZNF575	2	132054	1	484438	0.117993	0.992606	ZNF575	DOX17againstowncontroln2	0	1	1	1	0.666667
DOX17againstowncontroln2	MCC	40	132054	116	484438	0.118843	0.996396	MCC	DOX17againstowncontroln2	1	37	2	27	0.597015
DOX17againstowncontroln2	LOC647946	32	132054	90	484438	0.11953	0.996396	LOC647946	DOX17againstowncontroln2	0	32	0	19	0.627451
DOX17againstowncontroln2	SMARCA2	39	132054	113	484438	0.121312	0.996396	SMARCA2	DOX17againstowncontroln2	1	38	0	30	0.565217
DOX17againstowncontroln2	ASAP2	20	132054	52	484438	0.122335	0.996396	ASAP2	DOX17againstowncontroln2	2	17	1	12	0.625
DOX17againstowncontroln2	KCTD20	20	132054	52	484438	0.122335	0.996396	KCTD20	DOX17againstowncontroln2	2	18	0	13	0.606061
DOX17againstowncontroln2	CDK5RAP2	8	132054	16	484438	0.122503	0.996396	CDK5RAP2	DOX17againstowncontroln2	1	6	1	6	0.571429
DOX17againstowncontroln2	GPRIN3	8	132054	16	484438	0.122503	0.996396	GPRIN3	DOX17againstowncontroln2	1	6	1	6	0.571429
DOX17againstowncontroln2	KBTBD3	8	132054	16	484438	0.122503	0.996396	KBTBD3	DOX17againstowncontroln2	0	8	0	5	0.615385
DOX17againstowncontroln2	KCNIP1	8	132054	16	484438	0.122503	0.996396	KCNIP1	DOX17againstowncontroln2	0	8	0	5	0.615385
DOX17againstowncontroln2	MYADM	8	132054	16	484438	0.122503	0.996396	MYADM	DOX17againstowncontroln2	2	5	1	6	0.571429
DOX17againstowncontroln2	NAA15	8	132054	16	484438	0.122503	0.996396	NAA15	DOX17againstowncontroln2	0	6	2	1	0.888889
DOX17againstowncontroln2	OSTBETA	8	132054	16	484438	0.122503	0.996396	OSTBETA	DOX17againstowncontroln2	0	7	1	4	0.666667
DOX17againstowncontroln2	PAXIP1	8	132054	16	484438	0.122503	0.996396	PAXIP1	DOX17againstowncontroln2	0	8	0	6	0.571429
DOX17againstowncontroln2	PLOD3	8	132054	16	484438	0.122503	0.996396	PLOD3	DOX17againstowncontroln2	2	3	3	3	0.727273
DOX17againstowncontroln2	PNPLA3	8	132054	16	484438	0.122503	0.996396	PNPLA3	DOX17againstowncontroln2	1	7	0	2	0.8
DOX17againstowncontroln2	PYY	8	132054	16	484438	0.122503	0.996396	PYY	DOX17againstowncontroln2	0	8	0	6	0.571429
DOX17againstowncontroln2	TBX3	8	132054	16	484438	0.122503	0.996396	TBX3	DOX17againstowncontroln2	4	2	2	1	0.888889
DOX17againstowncontroln2	ZNF521	8	132054	16	484438	0.122503	0.996396	ZNF521	DOX17againstowncontroln2	1	7	0	7	0.533333
DOX17againstowncontroln2	ZNF619	8	132054	16	484438	0.122503	0.996396	ZNF619	DOX17againstowncontroln2	2	4	2	7	0.533333
DOX17againstowncontroln2	SNUPN	26	132054	71	484438	0.122667	0.996396	SNUPN	DOX17againstowncontroln2	8	12	6	16	0.619048
DOX17againstowncontroln2	C1orf43	45	132054	133	484438	0.123287	0.996396	C1orf43	DOX17againstowncontroln2	7	33	5	26	0.633803
DOX17againstowncontroln2	LRP6	25	132054	68	484438	0.12489	0.996396	LRP6	DOX17againstowncontroln2	1	21	3	16	0.609756
DOX17againstowncontroln2	ACPL2	5	132054	8	484438	0.125396	0.996396	ACPL2	DOX17againstowncontroln2	0	5	0	2	0.714286
DOX17againstowncontroln2	AKAP5	5	132054	8	484438	0.125396	0.996396	AKAP5	DOX17againstowncontroln2	0	5	0	0	1
DOX17againstowncontroln2	ARL6IP6	5	132054	8	484438	0.125396	0.996396	ARL6IP6	DOX17againstowncontroln2	1	2	2	1	0.833333
DOX17againstowncontroln2	C10orf55	5	132054	8	484438	0.125396	0.996396	C10orf55	DOX17againstowncontroln2	1	1	3	0	1
DOX17againstowncontroln2	C9orf142	5	132054	8	484438	0.125396	0.996396	C9orf142	DOX17againstowncontroln2	1	2	2	0	1
DOX17againstowncontroln2	CHORDC1	5	132054	8	484438	0.125396	0.996396	CHORDC1	DOX17againstowncontroln2	0	5	0	4	0.555556
DOX17againstowncontroln2	COQ7	5	132054	8	484438	0.125396	0.996396	COQ7	DOX17againstowncontroln2	0	5	0	6	0.454545
DOX17againstowncontroln2	EFNA1	5	132054	8	484438	0.125396	0.996396	EFNA1	DOX17againstowncontroln2	0	5	0	2	0.714286
DOX17againstowncontroln2	EXOSC6	5	132054	8	484438	0.125396	0.996396	EXOSC6	DOX17againstowncontroln2	2	0	3	0	1
DOX17againstowncontroln2	FAM160B1	5	132054	8	484438	0.125396	0.996396	FAM160B1	DOX17againstowncontroln2	0	5	0	3	0.625
DOX17againstowncontroln2	GJB1	5	132054	8	484438	0.125396	0.996396	GJB1	DOX17againstowncontroln2	0	5	0	3	0.625
DOX17againstowncontroln2	GUCY1A2	5	132054	8	484438	0.125396	0.996396	GUCY1A2	DOX17againstowncontroln2	0	5	0	2	0.714286
DOX17againstowncontroln2	HCN3	5	132054	8	484438	0.125396	0.996396	HCN3	DOX17againstowncontroln2	3	2	0	4	0.555556
DOX17againstowncontroln2	LRFN2	5	132054	8	484438	0.125396	0.996396	LRFN2	DOX17againstowncontroln2	0	5	0	5	0.5
DOX17againstowncontroln2	LRRC47	5	132054	8	484438	0.125396	0.996396	LRRC47	DOX17againstowncontroln2	0	5	0	0	1
DOX17againstowncontroln2	PERP	5	132054	8	484438	0.125396	0.996396	PERP	DOX17againstowncontroln2	0	5	0	2	0.714286
DOX17againstowncontroln2	PKIB	5	132054	8	484438	0.125396	0.996396	PKIB	DOX17againstowncontroln2	0	5	0	4	0.555556
DOX17againstowncontroln2	PLA2G4C	5	132054	8	484438	0.125396	0.996396	PLA2G4C	DOX17againstowncontroln2	1	3	1	2	0.714286
DOX17againstowncontroln2	PQLC2	5	132054	8	484438	0.125396	0.996396	PQLC2	DOX17againstowncontroln2	1	4	0	0	1
DOX17againstowncontroln2	RANGRF	5	132054	8	484438	0.125396	0.996396	RANGRF	DOX17againstowncontroln2	2	1	2	0	1
DOX17againstowncontroln2	RBM15B	5	132054	8	484438	0.125396	0.996396	RBM15B	DOX17againstowncontroln2	2	0	3	0	1
DOX17againstowncontroln2	SERPINI1	5	132054	8	484438	0.125396	0.996396	SERPINI1	DOX17againstowncontroln2	0	4	1	4	0.555556
DOX17againstowncontroln2	STARD4	5	132054	8	484438	0.125396	0.996396	STARD4	DOX17againstowncontroln2	0	5	0	0	1
DOX17againstowncontroln2	STRADB	5	132054	8	484438	0.125396	0.996396	STRADB	DOX17againstowncontroln2	0	5	0	2	0.714286
DOX17againstowncontroln2	TMEM165	5	132054	8	484438	0.125396	0.996396	TMEM165	DOX17againstowncontroln2	0	5	0	1	0.833333
DOX17againstowncontroln2	TPPP	5	132054	8	484438	0.125396	0.996396	TPPP	DOX17againstowncontroln2	0	5	0	0	1
DOX17againstowncontroln2	TRMT12	5	132054	8	484438	0.125396	0.996396	TRMT12	DOX17againstowncontroln2	2	0	3	0	1
DOX17againstowncontroln2	TSSK6	5	132054	8	484438	0.125396	0.996396	TSSK6	DOX17againstowncontroln2	1	0	4	0	1
DOX17againstowncontroln2	YEATS4	5	132054	8	484438	0.125396	0.996396	YEATS4	DOX17againstowncontroln2	0	3	2	3	0.625
DOX17againstowncontroln2	ZNF394	5	132054	8	484438	0.125396	0.996396	ZNF394	DOX17againstowncontroln2	3	1	1	1	0.833333
DOX17againstowncontroln2	ZNF792	5	132054	8	484438	0.125396	0.996396	ZNF792	DOX17againstowncontroln2	0	2	3	3	0.625
DOX17againstowncontroln2	ABCC2	18	132054	46	484438	0.125525	0.996396	ABCC2	DOX17againstowncontroln2	3	13	2	7	0.72
DOX17againstowncontroln2	B4GALNT3	9	132054	19	484438	0.126391	0.996396	B4GALNT3	DOX17againstowncontroln2	1	8	0	3	0.75
DOX17againstowncontroln2	CDHR2	9	132054	19	484438	0.126391	0.996396	CDHR2	DOX17againstowncontroln2	1	5	3	1	0.9
DOX17againstowncontroln2	DBNDD2	9	132054	19	484438	0.126391	0.996396	DBNDD2	DOX17againstowncontroln2	1	8	0	5	0.642857
DOX17againstowncontroln2	FLYWCH2	9	132054	19	484438	0.126391	0.996396	FLYWCH2	DOX17againstowncontroln2	0	9	0	3	0.75
DOX17againstowncontroln2	MRPS26	9	132054	19	484438	0.126391	0.996396	MRPS26	DOX17againstowncontroln2	1	5	3	1	0.9
DOX17againstowncontroln2	REPIN1	9	132054	19	484438	0.126391	0.996396	REPIN1	DOX17againstowncontroln2	0	4	5	7	0.5625
DOX17againstowncontroln2	RNASEH2A	9	132054	19	484438	0.126391	0.996396	RNASEH2A	DOX17againstowncontroln2	2	6	1	4	0.692308
DOX17againstowncontroln2	RPS19	9	132054	19	484438	0.126391	0.996396	RPS19	DOX17againstowncontroln2	1	7	1	8	0.529412
DOX17againstowncontroln2	STK31	9	132054	19	484438	0.126391	0.996396	STK31	DOX17againstowncontroln2	1	7	1	6	0.6
DOX17againstowncontroln2	THAP10	9	132054	19	484438	0.126391	0.996396	THAP10	DOX17againstowncontroln2	3	5	1	1	0.9
DOX17againstowncontroln2	ZNF566	9	132054	19	484438	0.126391	0.996396	ZNF566	DOX17againstowncontroln2	0	9	0	4	0.692308
DOX17againstowncontroln2	DDX46	37	132054	107	484438	0.126436	0.996396	DDX46	DOX17againstowncontroln2	1	36	0	46	0.445783
DOX17againstowncontroln2	HHAT	17	132054	43	484438	0.126957	0.996396	HHAT	DOX17againstowncontroln2	0	13	4	20	0.459459
DOX17againstowncontroln2	HNRNPD	17	132054	43	484438	0.126957	0.996396	HNRNPD	DOX17againstowncontroln2	4	8	5	9	0.653846
DOX17againstowncontroln2	TRPC4AP	17	132054	43	484438	0.126957	0.996396	TRPC4AP	DOX17againstowncontroln2	0	17	0	7	0.708333
DOX17againstowncontroln2	ACYP2	33	132054	94	484438	0.127101	0.996396	ACYP2	DOX17againstowncontroln2	3	29	1	12	0.733333
DOX17againstowncontroln2	C17orf62	16	132054	40	484438	0.128235	0.996396	C17orf62	DOX17againstowncontroln2	0	16	0	11	0.592593
DOX17againstowncontroln2	TOE1	16	132054	40	484438	0.128235	0.996396	TOE1	DOX17againstowncontroln2	4	6	6	6	0.727273
DOX17againstowncontroln2	ASCC3	10	132054	22	484438	0.128786	0.996396	ASCC3	DOX17againstowncontroln2	1	9	0	6	0.625
DOX17againstowncontroln2	C2CD4A	10	132054	22	484438	0.128786	0.996396	C2CD4A	DOX17againstowncontroln2	6	1	3	1	0.909091
DOX17againstowncontroln2	DPF1	10	132054	22	484438	0.128786	0.996396	DPF1	DOX17againstowncontroln2	0	10	0	6	0.625
DOX17againstowncontroln2	FAM110B	10	132054	22	484438	0.128786	0.996396	FAM110B	DOX17againstowncontroln2	1	9	0	5	0.666667
DOX17againstowncontroln2	RBBP6	10	132054	22	484438	0.128786	0.996396	RBBP6	DOX17againstowncontroln2	6	1	3	5	0.666667
DOX17againstowncontroln2	SPHK1	10	132054	22	484438	0.128786	0.996396	SPHK1	DOX17againstowncontroln2	5	3	2	1	0.909091
DOX17againstowncontroln2	CHD2	52	132054	157	484438	0.129057	0.996396	CHD2	DOX17againstowncontroln2	4	48	0	37	0.58427
DOX17againstowncontroln2	PRKCB	52	132054	157	484438	0.129057	0.996396	PRKCB	DOX17againstowncontroln2	1	49	2	71	0.422764
DOX17againstowncontroln2	C19orf23	15	132054	37	484438	0.129313	0.996396	C19orf23	DOX17againstowncontroln2	5	2	8	1	0.9375
DOX17againstowncontroln2	GPNMB	15	132054	37	484438	0.129313	0.996396	GPNMB	DOX17againstowncontroln2	4	6	5	7	0.681818
DOX17againstowncontroln2	NANP	15	132054	37	484438	0.129313	0.996396	NANP	DOX17againstowncontroln2	2	13	0	8	0.652174
DOX17againstowncontroln2	PARP15	15	132054	37	484438	0.129313	0.996396	PARP15	DOX17againstowncontroln2	0	15	0	15	0.5
DOX17againstowncontroln2	B4GALT2	11	132054	25	484438	0.130113	0.996396	B4GALT2	DOX17againstowncontroln2	1	9	1	3	0.785714
DOX17againstowncontroln2	CCNL2	11	132054	25	484438	0.130113	0.996396	CCNL2	DOX17againstowncontroln2	3	5	3	4	0.733333
DOX17againstowncontroln2	CDK10	11	132054	25	484438	0.130113	0.996396	CDK10	DOX17againstowncontroln2	0	10	1	10	0.52381
DOX17againstowncontroln2	ERMAP	11	132054	25	484438	0.130113	0.996396	ERMAP	DOX17againstowncontroln2	0	11	0	3	0.785714
DOX17againstowncontroln2	PPP2R2B	11	132054	25	484438	0.130113	0.996396	PPP2R2B	DOX17againstowncontroln2	0	11	0	3	0.785714
DOX17againstowncontroln2	SEC24B	11	132054	25	484438	0.130113	0.996396	SEC24B	DOX17againstowncontroln2	1	9	1	2	0.846154
DOX17againstowncontroln2	SIRT1	11	132054	25	484438	0.130113	0.996396	SIRT1	DOX17againstowncontroln2	0	11	0	6	0.647059
DOX17againstowncontroln2	CBL	14	132054	34	484438	0.130133	0.996396	CBL	DOX17againstowncontroln2	0	10	4	12	0.538462
DOX17againstowncontroln2	FAM111A	14	132054	34	484438	0.130133	0.996396	FAM111A	DOX17againstowncontroln2	0	12	2	6	0.7
DOX17againstowncontroln2	NTRK2	14	132054	34	484438	0.130133	0.996396	NTRK2	DOX17againstowncontroln2	0	14	0	9	0.608696
DOX17againstowncontroln2	SRPK1	14	132054	34	484438	0.130133	0.996396	SRPK1	DOX17againstowncontroln2	1	12	1	8	0.636364
DOX17againstowncontroln2	USP47	14	132054	34	484438	0.130133	0.996396	USP47	DOX17againstowncontroln2	2	11	1	5	0.736842
DOX17againstowncontroln2	ZNFX1	14	132054	34	484438	0.130133	0.996396	ZNFX1	DOX17againstowncontroln2	2	12	0	6	0.7
DOX17againstowncontroln2	PCBD2	13	132054	31	484438	0.130615	0.996396	PCBD2	DOX17againstowncontroln2	0	13	0	8	0.619048
DOX17againstowncontroln2	TET2	13	132054	31	484438	0.130615	0.996396	TET2	DOX17againstowncontroln2	2	8	3	6	0.684211
DOX17againstowncontroln2	FSD1L	12	132054	28	484438	0.130656	0.996396	FSD1L	DOX17againstowncontroln2	1	11	0	4	0.75
DOX17againstowncontroln2	MED12L	12	132054	28	484438	0.130656	0.996396	MED12L	DOX17againstowncontroln2	0	12	0	4	0.75
DOX17againstowncontroln2	NCRNA00081	12	132054	28	484438	0.130656	0.996396	NCRNA00081	DOX17againstowncontroln2	1	11	0	6	0.666667
DOX17againstowncontroln2	NDUFAF3	12	132054	28	484438	0.130656	0.996396	NDUFAF3	DOX17againstowncontroln2	4	4	4	3	0.8
DOX17againstowncontroln2	PRR14	12	132054	28	484438	0.130656	0.996396	PRR14	DOX17againstowncontroln2	1	6	5	4	0.75
DOX17againstowncontroln2	SCHIP1	12	132054	28	484438	0.130656	0.996396	SCHIP1	DOX17againstowncontroln2	1	8	3	13	0.48
DOX17againstowncontroln2	UBXN2A	12	132054	28	484438	0.130656	0.996396	UBXN2A	DOX17againstowncontroln2	1	11	0	6	0.666667
DOX17againstowncontroln2	THAP6	42	132054	124	484438	0.131325	0.996396	THAP6	DOX17againstowncontroln2	14	9	19	13	0.763636
DOX17againstowncontroln2	ATG7	22	132054	59	484438	0.131628	0.996396	ATG7	DOX17againstowncontroln2	0	22	0	14	0.611111
DOX17againstowncontroln2	C14orf181	22	132054	59	484438	0.131628	0.996396	C14orf181	DOX17againstowncontroln2	13	0	9	0	1
DOX17againstowncontroln2	DDX10	22	132054	59	484438	0.131628	0.996396	DDX10	DOX17againstowncontroln2	0	22	0	11	0.666667
DOX17againstowncontroln2	LYRM1	38	132054	111	484438	0.13325	0.996396	LYRM1	DOX17againstowncontroln2	3	35	0	32	0.542857
DOX17againstowncontroln2	FARP1	20	132054	53	484438	0.136105	0.996396	FARP1	DOX17againstowncontroln2	0	19	1	16	0.555556
DOX17againstowncontroln2	NRG1	20	132054	53	484438	0.136105	0.996396	NRG1	DOX17againstowncontroln2	0	20	0	17	0.540541
DOX17againstowncontroln2	YEATS2	20	132054	53	484438	0.136105	0.996396	YEATS2	DOX17againstowncontroln2	0	19	1	9	0.689655
DOX17againstowncontroln2	C19orf56	6	132054	11	484438	0.136989	0.996396	C19orf56	DOX17againstowncontroln2	3	1	2	0	1
DOX17againstowncontroln2	C7orf31	6	132054	11	484438	0.136989	0.996396	C7orf31	DOX17againstowncontroln2	1	4	1	4	0.6
DOX17againstowncontroln2	C8orf39	6	132054	11	484438	0.136989	0.996396	C8orf39	DOX17againstowncontroln2	2	0	4	0	1
DOX17againstowncontroln2	CCHCR1	6	132054	11	484438	0.136989	0.996396	CCHCR1	DOX17againstowncontroln2	1	3	2	1	0.857143
DOX17againstowncontroln2	CPSF7	6	132054	11	484438	0.136989	0.996396	CPSF7	DOX17againstowncontroln2	2	4	0	1	0.857143
DOX17againstowncontroln2	CREB3L2	6	132054	11	484438	0.136989	0.996396	CREB3L2	DOX17againstowncontroln2	1	5	0	0	1
DOX17againstowncontroln2	DLX2	6	132054	11	484438	0.136989	0.996396	DLX2	DOX17againstowncontroln2	6	0	0	0	1
DOX17againstowncontroln2	HSD17B3	6	132054	11	484438	0.136989	0.996396	HSD17B3	DOX17againstowncontroln2	3	3	0	0	1
DOX17againstowncontroln2	LOC202781	6	132054	11	484438	0.136989	0.996396	LOC202781	DOX17againstowncontroln2	3	0	3	0	1
DOX17againstowncontroln2	LOC401588	6	132054	11	484438	0.136989	0.996396	LOC401588	DOX17againstowncontroln2	2	3	1	1	0.857143
DOX17againstowncontroln2	MRVI1	6	132054	11	484438	0.136989	0.996396	MRVI1	DOX17againstowncontroln2	0	6	0	2	0.75
DOX17againstowncontroln2	NCRNA00235	6	132054	11	484438	0.136989	0.996396	NCRNA00235	DOX17againstowncontroln2	3	0	3	0	1
DOX17againstowncontroln2	NTHL1	6	132054	11	484438	0.136989	0.996396	NTHL1	DOX17againstowncontroln2	0	6	0	3	0.666667
DOX17againstowncontroln2	SMPDL3B	6	132054	11	484438	0.136989	0.996396	SMPDL3B	DOX17againstowncontroln2	1	5	0	3	0.666667
DOX17againstowncontroln2	SNAP25	6	132054	11	484438	0.136989	0.996396	SNAP25	DOX17againstowncontroln2	0	6	0	2	0.75
DOX17againstowncontroln2	STRN	6	132054	11	484438	0.136989	0.996396	STRN	DOX17againstowncontroln2	1	4	1	6	0.5
DOX17againstowncontroln2	TCOF1	6	132054	11	484438	0.136989	0.996396	TCOF1	DOX17againstowncontroln2	0	6	0	3	0.666667
DOX17againstowncontroln2	UNC50	6	132054	11	484438	0.136989	0.996396	UNC50	DOX17againstowncontroln2	0	6	0	5	0.545455
DOX17againstowncontroln2	VSX2	6	132054	11	484438	0.136989	0.996396	VSX2	DOX17againstowncontroln2	0	6	0	11	0.352941
DOX17againstowncontroln2	WDR13	6	132054	11	484438	0.136989	0.996396	WDR13	DOX17againstowncontroln2	4	0	2	0	1
DOX17againstowncontroln2	ZDHHC21	6	132054	11	484438	0.136989	0.996396	ZDHHC21	DOX17againstowncontroln2	1	2	3	1	0.857143
DOX17againstowncontroln2	ZNF620	6	132054	11	484438	0.136989	0.996396	ZNF620	DOX17againstowncontroln2	0	6	0	2	0.75
DOX17againstowncontroln2	PION	49	132054	148	484438	0.137502	0.996396	PION	DOX17againstowncontroln2	1	47	1	37	0.569767
DOX17againstowncontroln2	ITSN2	19	132054	50	484438	0.138305	0.996396	ITSN2	DOX17againstowncontroln2	0	19	0	12	0.612903
DOX17againstowncontroln2	LITAF	19	132054	50	484438	0.138305	0.996396	LITAF	DOX17againstowncontroln2	5	11	3	16	0.542857
DOX17againstowncontroln2	MTDH	19	132054	50	484438	0.138305	0.996396	MTDH	DOX17againstowncontroln2	2	17	0	7	0.730769
DOX17againstowncontroln2	SLC9A9	19	132054	50	484438	0.138305	0.996396	SLC9A9	DOX17againstowncontroln2	0	19	0	12	0.612903
DOX17againstowncontroln2	LOC100128788	32	132054	92	484438	0.140428	0.996396	LOC100128788	DOX17againstowncontroln2	3	28	1	32	0.5
DOX17againstowncontroln2	ATP1A1	18	132054	47	484438	0.140458	0.996396	ATP1A1	DOX17againstowncontroln2	1	16	1	10	0.642857
DOX17againstowncontroln2	GATA2	28	132054	79	484438	0.140829	0.996396	GATA2	DOX17againstowncontroln2	2	26	0	22	0.56
DOX17againstowncontroln2	BTG2	17	132054	44	484438	0.14254	0.996396	BTG2	DOX17againstowncontroln2	5	2	10	1	0.944444
DOX17againstowncontroln2	TXNDC15	27	132054	76	484438	0.143768	0.996396	TXNDC15	DOX17againstowncontroln2	5	15	7	11	0.710526
DOX17againstowncontroln2	ALKBH8	7	132054	14	484438	0.143918	0.996396	ALKBH8	DOX17againstowncontroln2	0	7	0	3	0.7
DOX17againstowncontroln2	ARHGAP8	7	132054	14	484438	0.143918	0.996396	ARHGAP8	DOX17againstowncontroln2	0	7	0	1	0.875
DOX17againstowncontroln2	BPHL	7	132054	14	484438	0.143918	0.996396	BPHL	DOX17againstowncontroln2	0	5	2	2	0.777778
DOX17againstowncontroln2	C6orf123	7	132054	14	484438	0.143918	0.996396	C6orf123	DOX17againstowncontroln2	0	7	0	1	0.875
DOX17againstowncontroln2	CACNA1I	7	132054	14	484438	0.143918	0.996396	CACNA1I	DOX17againstowncontroln2	0	7	0	5	0.583333
DOX17againstowncontroln2	CFD	7	132054	14	484438	0.143918	0.996396	CFD	DOX17againstowncontroln2	1	5	1	1	0.875
DOX17againstowncontroln2	DLX3	7	132054	14	484438	0.143918	0.996396	DLX3	DOX17againstowncontroln2	0	7	0	7	0.5
DOX17againstowncontroln2	EDEM1	7	132054	14	484438	0.143918	0.996396	EDEM1	DOX17againstowncontroln2	0	5	2	2	0.777778
DOX17againstowncontroln2	FXYD5	7	132054	14	484438	0.143918	0.996396	FXYD5	DOX17againstowncontroln2	3	1	3	3	0.7
DOX17againstowncontroln2	IL16	7	132054	14	484438	0.143918	0.996396	IL16	DOX17againstowncontroln2	0	7	0	3	0.7
DOX17againstowncontroln2	JPH1	7	132054	14	484438	0.143918	0.996396	JPH1	DOX17againstowncontroln2	1	4	2	7	0.5
DOX17againstowncontroln2	MTTP	7	132054	14	484438	0.143918	0.996396	MTTP	DOX17againstowncontroln2	1	6	0	5	0.583333
DOX17againstowncontroln2	NAT9	7	132054	14	484438	0.143918	0.996396	NAT9	DOX17againstowncontroln2	2	5	0	2	0.777778
DOX17againstowncontroln2	OAZ1	7	132054	14	484438	0.143918	0.996396	OAZ1	DOX17againstowncontroln2	3	1	3	3	0.7
DOX17againstowncontroln2	PTPN18	7	132054	14	484438	0.143918	0.996396	PTPN18	DOX17againstowncontroln2	2	3	2	3	0.7
DOX17againstowncontroln2	RAB4B	7	132054	14	484438	0.143918	0.996396	RAB4B	DOX17againstowncontroln2	0	6	1	5	0.583333
DOX17againstowncontroln2	RAP1GDS1	7	132054	14	484438	0.143918	0.996396	RAP1GDS1	DOX17againstowncontroln2	0	7	0	8	0.466667
DOX17againstowncontroln2	TIMD4	7	132054	14	484438	0.143918	0.996396	TIMD4	DOX17againstowncontroln2	0	7	0	5	0.583333
DOX17againstowncontroln2	TP53I13	7	132054	14	484438	0.143918	0.996396	TP53I13	DOX17againstowncontroln2	0	7	0	3	0.7
DOX17againstowncontroln2	TTC19	7	132054	14	484438	0.143918	0.996396	TTC19	DOX17againstowncontroln2	1	5	1	5	0.583333
DOX17againstowncontroln2	CPNE1	16	132054	41	484438	0.144523	0.996396	CPNE1	DOX17againstowncontroln2	1	15	0	9	0.64
DOX17againstowncontroln2	SFMBT2	22	132054	60	484438	0.145164	0.996396	SFMBT2	DOX17againstowncontroln2	1	18	3	22	0.5
DOX17againstowncontroln2	RASIP1	34	132054	99	484438	0.145178	0.996396	RASIP1	DOX17againstowncontroln2	8	24	2	15	0.693878
DOX17againstowncontroln2	ZNRF2	177	132054	591	484438	0.146111	0.996396	ZNRF2	DOX17againstowncontroln2	15	151	11	155	0.533133
DOX17againstowncontroln2	C16orf62	15	132054	38	484438	0.14637	0.996396	C16orf62	DOX17againstowncontroln2	0	15	0	11	0.576923
DOX17againstowncontroln2	GTF2A2	15	132054	38	484438	0.14637	0.996396	GTF2A2	DOX17againstowncontroln2	0	15	0	7	0.681818
DOX17againstowncontroln2	RPL17	15	132054	38	484438	0.14637	0.996396	RPL17	DOX17againstowncontroln2	2	7	6	10	0.6
DOX17againstowncontroln2	SERTAD3	15	132054	38	484438	0.14637	0.996396	SERTAD3	DOX17againstowncontroln2	1	11	3	10	0.6
DOX17againstowncontroln2	VPRBP	15	132054	38	484438	0.14637	0.996396	VPRBP	DOX17againstowncontroln2	2	10	3	12	0.555556
DOX17againstowncontroln2	PTPRN2	26	132054	73	484438	0.146773	0.996396	PTPRN2	DOX17againstowncontroln2	0	26	0	23	0.530612
DOX17againstowncontroln2	TOX3	26	132054	73	484438	0.146773	0.996396	TOX3	DOX17againstowncontroln2	1	25	0	23	0.530612
DOX17againstowncontroln2	AGPAT2	4	132054	6	484438	0.147204	0.996396	AGPAT2	DOX17againstowncontroln2	0	4	0	4	0.5
DOX17againstowncontroln2	C17orf79	4	132054	6	484438	0.147204	0.996396	C17orf79	DOX17againstowncontroln2	0	4	0	1	0.8
DOX17againstowncontroln2	C4orf3	4	132054	6	484438	0.147204	0.996396	C4orf3	DOX17againstowncontroln2	0	3	1	1	0.8
DOX17againstowncontroln2	CITED1	4	132054	6	484438	0.147204	0.996396	CITED1	DOX17againstowncontroln2	1	1	2	0	1
DOX17againstowncontroln2	CKM	4	132054	6	484438	0.147204	0.996396	CKM	DOX17againstowncontroln2	2	2	0	1	0.8
DOX17againstowncontroln2	CPT1C	4	132054	6	484438	0.147204	0.996396	CPT1C	DOX17againstowncontroln2	1	1	2	1	0.8
DOX17againstowncontroln2	CXCR7	4	132054	6	484438	0.147204	0.996396	CXCR7	DOX17againstowncontroln2	0	2	2	0	1
DOX17againstowncontroln2	DLX4	4	132054	6	484438	0.147204	0.996396	DLX4	DOX17againstowncontroln2	0	4	0	3	0.571429
DOX17againstowncontroln2	ERP44	4	132054	6	484438	0.147204	0.996396	ERP44	DOX17againstowncontroln2	0	3	1	2	0.666667
DOX17againstowncontroln2	FAM38B	4	132054	6	484438	0.147204	0.996396	FAM38B	DOX17againstowncontroln2	0	4	0	1	0.8
DOX17againstowncontroln2	FLJ39653	4	132054	6	484438	0.147204	0.996396	FLJ39653	DOX17againstowncontroln2	1	2	1	1	0.8
DOX17againstowncontroln2	FUCA2	4	132054	6	484438	0.147204	0.996396	FUCA2	DOX17againstowncontroln2	1	3	0	1	0.8
DOX17againstowncontroln2	ING4	4	132054	6	484438	0.147204	0.996396	ING4	DOX17againstowncontroln2	0	4	0	0	1
DOX17againstowncontroln2	KIAA0196	4	132054	6	484438	0.147204	0.996396	KIAA0196	DOX17againstowncontroln2	0	4	0	3	0.571429
DOX17againstowncontroln2	LIPA	4	132054	6	484438	0.147204	0.996396	LIPA	DOX17againstowncontroln2	0	4	0	2	0.666667
DOX17againstowncontroln2	LLGL1	4	132054	6	484438	0.147204	0.996396	LLGL1	DOX17againstowncontroln2	0	4	0	2	0.666667
DOX17againstowncontroln2	LPAR6	4	132054	6	484438	0.147204	0.996396	LPAR6	DOX17againstowncontroln2	1	0	3	1	0.8
DOX17againstowncontroln2	NSUN5	4	132054	6	484438	0.147204	0.996396	NSUN5	DOX17againstowncontroln2	2	2	0	0	1
DOX17againstowncontroln2	ORC4L	4	132054	6	484438	0.147204	0.996396	ORC4L	DOX17againstowncontroln2	0	4	0	0	1
DOX17againstowncontroln2	OS9	4	132054	6	484438	0.147204	0.996396	OS9	DOX17againstowncontroln2	1	2	1	0	1
DOX17againstowncontroln2	PDP2	4	132054	6	484438	0.147204	0.996396	PDP2	DOX17againstowncontroln2	0	4	0	5	0.444444
DOX17againstowncontroln2	RAB35	4	132054	6	484438	0.147204	0.996396	RAB35	DOX17againstowncontroln2	0	3	1	2	0.666667
DOX17againstowncontroln2	RHOC	4	132054	6	484438	0.147204	0.996396	RHOC	DOX17againstowncontroln2	1	3	0	3	0.571429
DOX17againstowncontroln2	SIGIRR	4	132054	6	484438	0.147204	0.996396	SIGIRR	DOX17againstowncontroln2	1	0	3	1	0.8
DOX17againstowncontroln2	TGOLN2	4	132054	6	484438	0.147204	0.996396	TGOLN2	DOX17againstowncontroln2	1	1	2	1	0.8
DOX17againstowncontroln2	TMEM93	4	132054	6	484438	0.147204	0.996396	TMEM93	DOX17againstowncontroln2	3	0	1	1	0.8
DOX17againstowncontroln2	TPI1	4	132054	6	484438	0.147204	0.996396	TPI1	DOX17againstowncontroln2	1	2	1	2	0.666667
DOX17againstowncontroln2	ZNF142	4	132054	6	484438	0.147204	0.996396	ZNF142	DOX17againstowncontroln2	0	4	0	5	0.444444
DOX17againstowncontroln2	ZNF500	4	132054	6	484438	0.147204	0.996396	ZNF500	DOX17againstowncontroln2	0	3	1	2	0.666667
DOX17againstowncontroln2	ZNF622	4	132054	6	484438	0.147204	0.996396	ZNF622	DOX17againstowncontroln2	1	2	1	0	1
DOX17againstowncontroln2	ZNF655	4	132054	6	484438	0.147204	0.996396	ZNF655	DOX17againstowncontroln2	1	2	1	1	0.8
DOX17againstowncontroln2	ZSWIM4	4	132054	6	484438	0.147204	0.996396	ZSWIM4	DOX17againstowncontroln2	2	2	0	2	0.666667
DOX17againstowncontroln2	ACAT2	8	132054	17	484438	0.147977	0.996396	ACAT2	DOX17againstowncontroln2	3	4	1	4	0.666667
DOX17againstowncontroln2	ASPDH	8	132054	17	484438	0.147977	0.996396	ASPDH	DOX17againstowncontroln2	5	1	2	7	0.533333
DOX17againstowncontroln2	C11orf68	8	132054	17	484438	0.147977	0.996396	C11orf68	DOX17againstowncontroln2	1	7	0	4	0.666667
DOX17againstowncontroln2	CAPRIN2	8	132054	17	484438	0.147977	0.996396	CAPRIN2	DOX17againstowncontroln2	3	3	2	2	0.8
DOX17againstowncontroln2	CHCHD6	8	132054	17	484438	0.147977	0.996396	CHCHD6	DOX17againstowncontroln2	0	8	0	5	0.615385
DOX17againstowncontroln2	HMCN1	8	132054	17	484438	0.147977	0.996396	HMCN1	DOX17againstowncontroln2	1	7	0	7	0.533333
DOX17againstowncontroln2	PXN	8	132054	17	484438	0.147977	0.996396	PXN	DOX17againstowncontroln2	0	8	0	5	0.615385
DOX17againstowncontroln2	SCN8A	8	132054	17	484438	0.147977	0.996396	SCN8A	DOX17againstowncontroln2	0	8	0	9	0.470588
DOX17againstowncontroln2	SIX3	8	132054	17	484438	0.147977	0.996396	SIX3	DOX17againstowncontroln2	2	3	3	2	0.8
DOX17againstowncontroln2	TRIP11	8	132054	17	484438	0.147977	0.996396	TRIP11	DOX17againstowncontroln2	1	7	0	7	0.533333
DOX17againstowncontroln2	ZNF251	8	132054	17	484438	0.147977	0.996396	ZNF251	DOX17againstowncontroln2	0	8	0	4	0.666667
DOX17againstowncontroln2	CAMTA2	14	132054	35	484438	0.148031	0.996396	CAMTA2	DOX17againstowncontroln2	6	1	7	4	0.777778
DOX17againstowncontroln2	DHX34	14	132054	35	484438	0.148031	0.996396	DHX34	DOX17againstowncontroln2	1	12	1	6	0.7
DOX17againstowncontroln2	USP18	14	132054	35	484438	0.148031	0.996396	USP18	DOX17againstowncontroln2	0	13	1	10	0.583333
DOX17againstowncontroln2	C11orf59	13	132054	32	484438	0.149441	0.996396	C11orf59	DOX17againstowncontroln2	1	12	0	6	0.684211
DOX17againstowncontroln2	WDR64	13	132054	32	484438	0.149441	0.996396	WDR64	DOX17againstowncontroln2	1	12	0	9	0.590909
DOX17againstowncontroln2	ZNF367	13	132054	32	484438	0.149441	0.996396	ZNF367	DOX17againstowncontroln2	5	1	7	0	1
DOX17againstowncontroln2	NECAB2	25	132054	70	484438	0.149845	0.996396	NECAB2	DOX17againstowncontroln2	0	25	0	15	0.625
DOX17againstowncontroln2	RSBN1L	25	132054	70	484438	0.149845	0.996396	RSBN1L	DOX17againstowncontroln2	7	17	1	14	0.641026
DOX17againstowncontroln2	IFT81	42	132054	126	484438	0.150104	0.996396	IFT81	DOX17againstowncontroln2	5	27	10	21	0.666667
DOX17againstowncontroln2	AIMP1	9	132054	20	484438	0.150167	0.996396	AIMP1	DOX17againstowncontroln2	4	1	4	5	0.642857
DOX17againstowncontroln2	BTLA	9	132054	20	484438	0.150167	0.996396	BTLA	DOX17againstowncontroln2	1	8	0	8	0.529412
DOX17againstowncontroln2	CNPY2	9	132054	20	484438	0.150167	0.996396	CNPY2	DOX17againstowncontroln2	2	5	2	5	0.642857
DOX17againstowncontroln2	COL16A1	9	132054	20	484438	0.150167	0.996396	COL16A1	DOX17againstowncontroln2	0	9	0	1	0.9
DOX17againstowncontroln2	DNM1P35	9	132054	20	484438	0.150167	0.996396	DNM1P35	DOX17againstowncontroln2	4	0	5	0	1
DOX17againstowncontroln2	DVL2	9	132054	20	484438	0.150167	0.996396	DVL2	DOX17againstowncontroln2	2	6	1	6	0.6
DOX17againstowncontroln2	KCNG3	9	132054	20	484438	0.150167	0.996396	KCNG3	DOX17againstowncontroln2	1	7	1	2	0.818182
DOX17againstowncontroln2	LOC144486	9	132054	20	484438	0.150167	0.996396	LOC144486	DOX17againstowncontroln2	6	0	3	0	1
DOX17againstowncontroln2	PEMT	9	132054	20	484438	0.150167	0.996396	PEMT	DOX17againstowncontroln2	0	9	0	7	0.5625
DOX17againstowncontroln2	ZIC3	9	132054	20	484438	0.150167	0.996396	ZIC3	DOX17againstowncontroln2	3	3	3	2	0.818182
DOX17againstowncontroln2	C11orf49	66	132054	207	484438	0.150321	0.996396	C11orf49	DOX17againstowncontroln2	1	65	0	52	0.559322
DOX17againstowncontroln2	ACAP3	12	132054	29	484438	0.150511	0.996396	ACAP3	DOX17againstowncontroln2	0	11	1	5	0.705882
DOX17againstowncontroln2	NLRX1	12	132054	29	484438	0.150511	0.996396	NLRX1	DOX17againstowncontroln2	1	10	1	2	0.857143
DOX17againstowncontroln2	SMARCD2	12	132054	29	484438	0.150511	0.996396	SMARCD2	DOX17againstowncontroln2	2	8	2	10	0.545455
DOX17againstowncontroln2	SOS1	12	132054	29	484438	0.150511	0.996396	SOS1	DOX17againstowncontroln2	1	11	0	8	0.6
DOX17againstowncontroln2	ABHD14B	20	132054	54	484438	0.150733	0.996396	ABHD14B	DOX17againstowncontroln2	8	5	7	1	0.952381
DOX17againstowncontroln2	C22orf26	10	132054	23	484438	0.151087	0.996396	C22orf26	DOX17againstowncontroln2	1	9	0	1	0.909091
DOX17againstowncontroln2	CLUL1	10	132054	23	484438	0.151087	0.996396	CLUL1	DOX17againstowncontroln2	1	7	2	6	0.625
DOX17againstowncontroln2	KPNA1	10	132054	23	484438	0.151087	0.996396	KPNA1	DOX17againstowncontroln2	0	10	0	4	0.714286
DOX17againstowncontroln2	LOC283314	10	132054	23	484438	0.151087	0.996396	LOC283314	DOX17againstowncontroln2	3	5	2	5	0.666667
DOX17againstowncontroln2	LPXN	10	132054	23	484438	0.151087	0.996396	LPXN	DOX17againstowncontroln2	0	9	1	3	0.769231
DOX17againstowncontroln2	SETD3	10	132054	23	484438	0.151087	0.996396	SETD3	DOX17againstowncontroln2	0	10	0	8	0.555556
DOX17againstowncontroln2	SPG11	10	132054	23	484438	0.151087	0.996396	SPG11	DOX17againstowncontroln2	1	8	1	6	0.625
DOX17againstowncontroln2	THAP5	10	132054	23	484438	0.151087	0.996396	THAP5	DOX17againstowncontroln2	5	5	0	2	0.833333
DOX17againstowncontroln2	ZBTB41	10	132054	23	484438	0.151087	0.996396	ZBTB41	DOX17againstowncontroln2	0	8	2	3	0.769231
DOX17againstowncontroln2	ZNF771	10	132054	23	484438	0.151087	0.996396	ZNF771	DOX17againstowncontroln2	3	6	1	4	0.714286
DOX17againstowncontroln2	ASXL2	11	132054	26	484438	0.151117	0.996396	ASXL2	DOX17againstowncontroln2	0	11	0	8	0.578947
DOX17againstowncontroln2	FAM125A	11	132054	26	484438	0.151117	0.996396	FAM125A	DOX17againstowncontroln2	1	8	2	7	0.611111
DOX17againstowncontroln2	MDK	11	132054	26	484438	0.151117	0.996396	MDK	DOX17againstowncontroln2	5	2	4	10	0.52381
DOX17againstowncontroln2	MESDC2	11	132054	26	484438	0.151117	0.996396	MESDC2	DOX17againstowncontroln2	1	10	0	6	0.647059
DOX17againstowncontroln2	MLST8	11	132054	26	484438	0.151117	0.996396	MLST8	DOX17againstowncontroln2	4	3	4	3	0.785714
DOX17againstowncontroln2	WEE1	11	132054	26	484438	0.151117	0.996396	WEE1	DOX17againstowncontroln2	1	5	5	6	0.647059
DOX17againstowncontroln2	PBLD	35	132054	103	484438	0.152791	0.996396	PBLD	DOX17againstowncontroln2	0	34	1	20	0.636364
DOX17againstowncontroln2	AEBP2	28	132054	80	484438	0.152989	0.996396	AEBP2	DOX17againstowncontroln2	4	22	2	28	0.5
DOX17againstowncontroln2	IMMP2L	84	132054	269	484438	0.153277	0.996396	IMMP2L	DOX17againstowncontroln2	2	82	0	64	0.567568
DOX17againstowncontroln2	SLC38A11	41	132054	123	484438	0.153435	0.996396	SLC38A11	DOX17againstowncontroln2	3	35	3	22	0.650794
DOX17againstowncontroln2	SEPT6	31	132054	90	484438	0.155017	0.996396	SEPT6	DOX17againstowncontroln2	11	10	10	11	0.738095
DOX17againstowncontroln2	MARCH1	99	132054	321	484438	0.155154	0.996396	MARCH1	DOX17againstowncontroln2	1	98	0	69	0.589286
DOX17againstowncontroln2	TCTA	23	132054	64	484438	0.15619	0.996396	TCTA	DOX17againstowncontroln2	4	18	1	14	0.621622
DOX17againstowncontroln2	TMEM187	27	132054	77	484438	0.156341	0.996396	TMEM187	DOX17againstowncontroln2	0	27	0	19	0.586957
DOX17againstowncontroln2	LRRC45	17	132054	45	484438	0.159139	0.996396	LRRC45	DOX17againstowncontroln2	3	10	4	12	0.586207
DOX17againstowncontroln2	RUSC2	17	132054	45	484438	0.159139	0.996396	RUSC2	DOX17againstowncontroln2	0	17	0	1	0.944444
DOX17againstowncontroln2	EPHA5	45	132054	137	484438	0.159424	0.996396	EPHA5	DOX17againstowncontroln2	1	43	1	25	0.642857
DOX17againstowncontroln2	GALNT13	22	132054	61	484438	0.159463	0.996396	GALNT13	DOX17againstowncontroln2	1	21	0	13	0.628571
DOX17againstowncontroln2	PARP1	22	132054	61	484438	0.159463	0.996396	PARP1	DOX17againstowncontroln2	1	21	0	20	0.52381
DOX17againstowncontroln2	FBXL22	26	132054	74	484438	0.159782	0.996396	FBXL22	DOX17againstowncontroln2	5	17	4	12	0.684211
DOX17againstowncontroln2	PCLO	55	132054	171	484438	0.161589	0.996396	PCLO	DOX17againstowncontroln2	0	53	2	33	0.625
DOX17againstowncontroln2	PTPN9	60	132054	188	484438	0.161679	0.996396	PTPN9	DOX17againstowncontroln2	11	35	14	36	0.625
DOX17againstowncontroln2	FAS	16	132054	42	484438	0.161894	0.996396	FAS	DOX17againstowncontroln2	1	14	1	10	0.615385
DOX17againstowncontroln2	MLL2	16	132054	42	484438	0.161894	0.996396	MLL2	DOX17againstowncontroln2	7	0	9	0	1
DOX17againstowncontroln2	PVT1	16	132054	42	484438	0.161894	0.996396	PVT1	DOX17againstowncontroln2	1	15	0	11	0.592593
DOX17againstowncontroln2	AKAP7	5	132054	9	484438	0.162228	0.996396	AKAP7	DOX17againstowncontroln2	0	5	0	3	0.625
DOX17againstowncontroln2	AKAP9	5	132054	9	484438	0.162228	0.996396	AKAP9	DOX17againstowncontroln2	0	4	1	4	0.555556
DOX17againstowncontroln2	C2orf69	5	132054	9	484438	0.162228	0.996396	C2orf69	DOX17againstowncontroln2	3	2	0	5	0.5
DOX17againstowncontroln2	C9orf156	5	132054	9	484438	0.162228	0.996396	C9orf156	DOX17againstowncontroln2	0	5	0	1	0.833333
DOX17againstowncontroln2	C9orf50	5	132054	9	484438	0.162228	0.996396	C9orf50	DOX17againstowncontroln2	0	2	3	0	1
DOX17againstowncontroln2	CABLES2	5	132054	9	484438	0.162228	0.996396	CABLES2	DOX17againstowncontroln2	2	2	1	0	1
DOX17againstowncontroln2	CDCP1	5	132054	9	484438	0.162228	0.996396	CDCP1	DOX17againstowncontroln2	1	4	0	3	0.625
DOX17againstowncontroln2	CNOT6L	5	132054	9	484438	0.162228	0.996396	CNOT6L	DOX17againstowncontroln2	0	5	0	2	0.714286
DOX17againstowncontroln2	CXXC1	5	132054	9	484438	0.162228	0.996396	CXXC1	DOX17againstowncontroln2	0	5	0	1	0.833333
DOX17againstowncontroln2	DAGLB	5	132054	9	484438	0.162228	0.996396	DAGLB	DOX17againstowncontroln2	3	1	1	2	0.714286
DOX17againstowncontroln2	DIMT1L	5	132054	9	484438	0.162228	0.996396	DIMT1L	DOX17againstowncontroln2	1	4	0	0	1
DOX17againstowncontroln2	DUSP3	5	132054	9	484438	0.162228	0.996396	DUSP3	DOX17againstowncontroln2	1	4	0	2	0.714286
DOX17againstowncontroln2	EDNRA	5	132054	9	484438	0.162228	0.996396	EDNRA	DOX17againstowncontroln2	3	0	2	3	0.625
DOX17againstowncontroln2	ETAA1	5	132054	9	484438	0.162228	0.996396	ETAA1	DOX17againstowncontroln2	1	3	1	0	1
DOX17againstowncontroln2	FAM19A4	5	132054	9	484438	0.162228	0.996396	FAM19A4	DOX17againstowncontroln2	0	5	0	4	0.555556
DOX17againstowncontroln2	FRMD8	5	132054	9	484438	0.162228	0.996396	FRMD8	DOX17againstowncontroln2	1	4	0	1	0.833333
DOX17againstowncontroln2	GLUD1	5	132054	9	484438	0.162228	0.996396	GLUD1	DOX17againstowncontroln2	0	5	0	2	0.714286
DOX17againstowncontroln2	GMFB	5	132054	9	484438	0.162228	0.996396	GMFB	DOX17againstowncontroln2	0	5	0	5	0.5
DOX17againstowncontroln2	GPR64	5	132054	9	484438	0.162228	0.996396	GPR64	DOX17againstowncontroln2	0	5	0	4	0.555556
DOX17againstowncontroln2	GPX1	5	132054	9	484438	0.162228	0.996396	GPX1	DOX17againstowncontroln2	1	0	4	0	1
DOX17againstowncontroln2	GSG1L	5	132054	9	484438	0.162228	0.996396	GSG1L	DOX17againstowncontroln2	0	5	0	1	0.833333
DOX17againstowncontroln2	HCFC1R1	5	132054	9	484438	0.162228	0.996396	HCFC1R1	DOX17againstowncontroln2	2	2	1	1	0.833333
DOX17againstowncontroln2	HEMK1	5	132054	9	484438	0.162228	0.996396	HEMK1	DOX17againstowncontroln2	0	5	0	3	0.625
DOX17againstowncontroln2	HOMEZ	5	132054	9	484438	0.162228	0.996396	HOMEZ	DOX17againstowncontroln2	0	5	0	3	0.625
DOX17againstowncontroln2	HOXA9	5	132054	9	484438	0.162228	0.996396	HOXA9	DOX17againstowncontroln2	2	1	2	1	0.833333
DOX17againstowncontroln2	HSPA12B	5	132054	9	484438	0.162228	0.996396	HSPA12B	DOX17againstowncontroln2	0	3	2	1	0.833333
DOX17againstowncontroln2	ICA1	5	132054	9	484438	0.162228	0.996396	ICA1	DOX17againstowncontroln2	2	3	0	1	0.833333
DOX17againstowncontroln2	KIAA1432	5	132054	9	484438	0.162228	0.996396	KIAA1432	DOX17againstowncontroln2	0	4	1	0	1
DOX17againstowncontroln2	KLHL9	5	132054	9	484438	0.162228	0.996396	KLHL9	DOX17againstowncontroln2	3	0	2	0	1
DOX17againstowncontroln2	LOC26102	5	132054	9	484438	0.162228	0.996396	LOC26102	DOX17againstowncontroln2	5	0	0	0	1
DOX17againstowncontroln2	LRRFIP2	5	132054	9	484438	0.162228	0.996396	LRRFIP2	DOX17againstowncontroln2	0	5	0	3	0.625
DOX17againstowncontroln2	MAPKAPK3	5	132054	9	484438	0.162228	0.996396	MAPKAPK3	DOX17againstowncontroln2	0	3	2	4	0.555556
DOX17againstowncontroln2	MESP1	5	132054	9	484438	0.162228	0.996396	MESP1	DOX17againstowncontroln2	1	1	3	3	0.625
DOX17againstowncontroln2	MSL3	5	132054	9	484438	0.162228	0.996396	MSL3	DOX17againstowncontroln2	0	4	1	1	0.833333
DOX17againstowncontroln2	NCRNA00219	5	132054	9	484438	0.162228	0.996396	NCRNA00219	DOX17againstowncontroln2	1	2	2	0	1
DOX17againstowncontroln2	NPTX1	5	132054	9	484438	0.162228	0.996396	NPTX1	DOX17againstowncontroln2	2	2	1	2	0.714286
DOX17againstowncontroln2	NTN3	5	132054	9	484438	0.162228	0.996396	NTN3	DOX17againstowncontroln2	1	1	3	2	0.714286
DOX17againstowncontroln2	PAFAH1B3	5	132054	9	484438	0.162228	0.996396	PAFAH1B3	DOX17againstowncontroln2	2	2	1	3	0.625
DOX17againstowncontroln2	PCDHGA2	5	132054	9	484438	0.162228	0.996396	PCDHGA2	DOX17againstowncontroln2	0	5	0	2	0.714286
DOX17againstowncontroln2	PCDHGA3	5	132054	9	484438	0.162228	0.996396	PCDHGA3	DOX17againstowncontroln2	0	5	0	2	0.714286
DOX17againstowncontroln2	PCDHGB1	5	132054	9	484438	0.162228	0.996396	PCDHGB1	DOX17againstowncontroln2	0	5	0	2	0.714286
DOX17againstowncontroln2	RGS12	5	132054	9	484438	0.162228	0.996396	RGS12	DOX17againstowncontroln2	1	3	1	2	0.714286
DOX17againstowncontroln2	RHOBTB3	5	132054	9	484438	0.162228	0.996396	RHOBTB3	DOX17againstowncontroln2	1	3	1	3	0.625
DOX17againstowncontroln2	SSR1	5	132054	9	484438	0.162228	0.996396	SSR1	DOX17againstowncontroln2	0	5	0	1	0.833333
DOX17againstowncontroln2	TGDS	5	132054	9	484438	0.162228	0.996396	TGDS	DOX17againstowncontroln2	0	5	0	5	0.5
DOX17againstowncontroln2	TMEM106A	5	132054	9	484438	0.162228	0.996396	TMEM106A	DOX17againstowncontroln2	0	5	0	0	1
DOX17againstowncontroln2	TMEM22	5	132054	9	484438	0.162228	0.996396	TMEM22	DOX17againstowncontroln2	1	3	1	4	0.555556
DOX17againstowncontroln2	TMEM50B	5	132054	9	484438	0.162228	0.996396	TMEM50B	DOX17againstowncontroln2	0	5	0	4	0.555556
DOX17againstowncontroln2	TPRKB	5	132054	9	484438	0.162228	0.996396	TPRKB	DOX17againstowncontroln2	0	5	0	12	0.294118
DOX17againstowncontroln2	UTS2D	5	132054	9	484438	0.162228	0.996396	UTS2D	DOX17againstowncontroln2	0	4	1	2	0.714286
DOX17againstowncontroln2	XIST	5	132054	9	484438	0.162228	0.996396	XIST	DOX17againstowncontroln2	4	1	0	0	1
DOX17againstowncontroln2	ZNF181	5	132054	9	484438	0.162228	0.996396	ZNF181	DOX17againstowncontroln2	2	0	3	0	1
DOX17againstowncontroln2	ZNF22	5	132054	9	484438	0.162228	0.996396	ZNF22	DOX17againstowncontroln2	1	4	0	1	0.833333
DOX17againstowncontroln2	METTL9	52	132054	161	484438	0.163076	0.996396	METTL9	DOX17againstowncontroln2	2	49	1	45	0.536082
DOX17againstowncontroln2	RCAN3	32	132054	94	484438	0.163367	0.996396	RCAN3	DOX17againstowncontroln2	13	4	15	15	0.680851
DOX17againstowncontroln2	FAM116A	15	132054	39	484438	0.164585	0.996396	FAM116A	DOX17againstowncontroln2	3	12	0	9	0.625
DOX17againstowncontroln2	FASTKD2	15	132054	39	484438	0.164585	0.996396	FASTKD2	DOX17againstowncontroln2	10	4	1	3	0.833333
DOX17againstowncontroln2	ITM2C	15	132054	39	484438	0.164585	0.996396	ITM2C	DOX17againstowncontroln2	0	15	0	8	0.652174
DOX17againstowncontroln2	RBP2	15	132054	39	484438	0.164585	0.996396	RBP2	DOX17againstowncontroln2	0	15	0	12	0.555556
DOX17againstowncontroln2	SLC25A40	15	132054	39	484438	0.164585	0.996396	SLC25A40	DOX17againstowncontroln2	0	15	0	10	0.6
DOX17againstowncontroln2	SNCA	15	132054	39	484438	0.164585	0.996396	SNCA	DOX17againstowncontroln2	0	15	0	10	0.6
DOX17againstowncontroln2	SPTBN4	15	132054	39	484438	0.164585	0.996396	SPTBN4	DOX17againstowncontroln2	5	7	3	5	0.75
DOX17againstowncontroln2	DOCK3	89	132054	288	484438	0.165317	0.996396	DOCK3	DOX17againstowncontroln2	4	79	6	54	0.622378
DOX17againstowncontroln2	CCDC51	20	132054	55	484438	0.166199	0.996396	CCDC51	DOX17againstowncontroln2	0	18	2	13	0.606061
DOX17againstowncontroln2	HEXIM2	20	132054	55	484438	0.166199	0.996396	HEXIM2	DOX17againstowncontroln2	1	18	1	11	0.645161
DOX17againstowncontroln2	KCNN1	20	132054	55	484438	0.166199	0.996396	KCNN1	DOX17againstowncontroln2	1	17	2	14	0.588235
DOX17againstowncontroln2	FRY	51	132054	158	484438	0.166635	0.996396	FRY	DOX17againstowncontroln2	1	50	0	30	0.62963
DOX17againstowncontroln2	RFFL	51	132054	158	484438	0.166635	0.996396	RFFL	DOX17againstowncontroln2	0	51	0	37	0.579545
DOX17againstowncontroln2	C19orf39	14	132054	36	484438	0.167175	0.996396	C19orf39	DOX17againstowncontroln2	6	2	6	1	0.933333
DOX17againstowncontroln2	MRM1	14	132054	36	484438	0.167175	0.996396	MRM1	DOX17againstowncontroln2	5	3	6	10	0.583333
DOX17againstowncontroln2	PTCH1	88	132054	285	484438	0.168461	0.996396	PTCH1	DOX17againstowncontroln2	7	76	5	55	0.615385
DOX17againstowncontroln2	MAD1L1	27	132054	78	484438	0.169513	0.996396	MAD1L1	DOX17againstowncontroln2	0	26	1	23	0.54
DOX17againstowncontroln2	DDX3X	13	132054	33	484438	0.169614	0.996396	DDX3X	DOX17againstowncontroln2	6	2	5	1	0.928571
DOX17againstowncontroln2	FUT1	13	132054	33	484438	0.169614	0.996396	FUT1	DOX17againstowncontroln2	3	7	3	6	0.684211
DOX17againstowncontroln2	KBTBD2	13	132054	33	484438	0.169614	0.996396	KBTBD2	DOX17againstowncontroln2	1	12	0	3	0.8125
DOX17againstowncontroln2	OGFOD2	19	132054	52	484438	0.169656	0.996396	OGFOD2	DOX17againstowncontroln2	4	3	12	10	0.655172
DOX17againstowncontroln2	SBNO2	19	132054	52	484438	0.169656	0.996396	SBNO2	DOX17againstowncontroln2	0	19	0	22	0.463415
DOX17againstowncontroln2	ABCA17P	6	132054	12	484438	0.17012	0.996396	ABCA17P	DOX17againstowncontroln2	0	6	0	3	0.666667
DOX17againstowncontroln2	ADAMTS20	6	132054	12	484438	0.17012	0.996396	ADAMTS20	DOX17againstowncontroln2	0	6	0	2	0.75
DOX17againstowncontroln2	AFTPH	6	132054	12	484438	0.17012	0.996396	AFTPH	DOX17againstowncontroln2	0	6	0	1	0.857143
DOX17againstowncontroln2	BHLHE22	6	132054	12	484438	0.17012	0.996396	BHLHE22	DOX17againstowncontroln2	4	0	2	0	1
DOX17againstowncontroln2	C9orf66	6	132054	12	484438	0.17012	0.996396	C9orf66	DOX17againstowncontroln2	2	0	4	0	1
DOX17againstowncontroln2	CD3EAP	6	132054	12	484438	0.17012	0.996396	CD3EAP	DOX17againstowncontroln2	3	2	1	2	0.75
DOX17againstowncontroln2	COL8A1	6	132054	12	484438	0.17012	0.996396	COL8A1	DOX17againstowncontroln2	0	6	0	3	0.666667
DOX17againstowncontroln2	CTSZ	6	132054	12	484438	0.17012	0.996396	CTSZ	DOX17againstowncontroln2	0	4	2	6	0.5
DOX17againstowncontroln2	CXCL16	6	132054	12	484438	0.17012	0.996396	CXCL16	DOX17againstowncontroln2	2	3	1	0	1
DOX17againstowncontroln2	CYP26B1	6	132054	12	484438	0.17012	0.996396	CYP26B1	DOX17againstowncontroln2	3	2	1	3	0.666667
DOX17againstowncontroln2	DCLRE1B	6	132054	12	484438	0.17012	0.996396	DCLRE1B	DOX17againstowncontroln2	3	2	1	1	0.857143
DOX17againstowncontroln2	FSHR	6	132054	12	484438	0.17012	0.996396	FSHR	DOX17againstowncontroln2	1	5	0	7	0.461538
DOX17againstowncontroln2	LACTB	6	132054	12	484438	0.17012	0.996396	LACTB	DOX17againstowncontroln2	1	5	0	4	0.6
DOX17againstowncontroln2	LOC285501	6	132054	12	484438	0.17012	0.996396	LOC285501	DOX17againstowncontroln2	0	6	0	5	0.545455
DOX17againstowncontroln2	NDUFB6	6	132054	12	484438	0.17012	0.996396	NDUFB6	DOX17againstowncontroln2	1	4	1	2	0.75
DOX17againstowncontroln2	NUDT13	6	132054	12	484438	0.17012	0.996396	NUDT13	DOX17againstowncontroln2	0	6	0	3	0.666667
DOX17againstowncontroln2	RNF141	6	132054	12	484438	0.17012	0.996396	RNF141	DOX17againstowncontroln2	0	6	0	3	0.666667
DOX17againstowncontroln2	TGFBR1	6	132054	12	484438	0.17012	0.996396	TGFBR1	DOX17againstowncontroln2	1	5	0	1	0.857143
DOX17againstowncontroln2	TRPM4	6	132054	12	484438	0.17012	0.996396	TRPM4	DOX17againstowncontroln2	1	4	1	3	0.666667
DOX17againstowncontroln2	UEVLD	6	132054	12	484438	0.17012	0.996396	UEVLD	DOX17againstowncontroln2	0	6	0	2	0.75
DOX17againstowncontroln2	UQCRB	6	132054	12	484438	0.17012	0.996396	UQCRB	DOX17againstowncontroln2	0	6	0	4	0.6
DOX17againstowncontroln2	ZKSCAN2	6	132054	12	484438	0.17012	0.996396	ZKSCAN2	DOX17againstowncontroln2	0	2	4	0	1
DOX17againstowncontroln2	ZNF616	6	132054	12	484438	0.17012	0.996396	ZNF616	DOX17againstowncontroln2	1	5	0	6	0.5
DOX17againstowncontroln2	CNTN1	74	132054	237	484438	0.170423	0.996396	CNTN1	DOX17againstowncontroln2	0	74	0	61	0.548148
DOX17againstowncontroln2	EML2	23	132054	65	484438	0.170674	0.996396	EML2	DOX17againstowncontroln2	2	18	3	11	0.676471
DOX17againstowncontroln2	PPFIA4	23	132054	65	484438	0.170674	0.996396	PPFIA4	DOX17againstowncontroln2	2	20	1	14	0.621622
DOX17againstowncontroln2	STX16	39	132054	118	484438	0.171179	0.996396	STX16	DOX17againstowncontroln2	5	32	2	30	0.565217
DOX17againstowncontroln2	SEL1L3	33	132054	98	484438	0.171591	0.996396	SEL1L3	DOX17againstowncontroln2	0	33	0	26	0.559322
DOX17againstowncontroln2	COMMD1	36	132054	108	484438	0.171614	0.996396	COMMD1	DOX17againstowncontroln2	0	36	0	33	0.521739
DOX17againstowncontroln2	C20orf29	12	132054	30	484438	0.171833	0.996396	C20orf29	DOX17againstowncontroln2	0	11	1	9	0.571429
DOX17againstowncontroln2	C6orf129	12	132054	30	484438	0.171833	0.996396	C6orf129	DOX17againstowncontroln2	0	12	0	11	0.521739
DOX17againstowncontroln2	DNAH2	12	132054	30	484438	0.171833	0.996396	DNAH2	DOX17againstowncontroln2	2	8	2	6	0.666667
DOX17againstowncontroln2	GRHL3	12	132054	30	484438	0.171833	0.996396	GRHL3	DOX17againstowncontroln2	1	10	1	7	0.631579
DOX17againstowncontroln2	HECW1	12	132054	30	484438	0.171833	0.996396	HECW1	DOX17againstowncontroln2	0	12	0	16	0.428571
DOX17againstowncontroln2	PAK1	12	132054	30	484438	0.171833	0.996396	PAK1	DOX17againstowncontroln2	0	11	1	9	0.571429
DOX17againstowncontroln2	PIP5K1B	12	132054	30	484438	0.171833	0.996396	PIP5K1B	DOX17againstowncontroln2	0	12	0	5	0.705882
DOX17againstowncontroln2	VDAC1	12	132054	30	484438	0.171833	0.996396	VDAC1	DOX17againstowncontroln2	0	12	0	14	0.461538
DOX17againstowncontroln2	CSMD3	71	132054	227	484438	0.172866	0.996396	CSMD3	DOX17againstowncontroln2	1	69	1	77	0.47973
DOX17againstowncontroln2	POLDIP3	18	132054	49	484438	0.173166	0.996396	POLDIP3	DOX17againstowncontroln2	0	18	0	9	0.666667
DOX17againstowncontroln2	AANAT	3	132054	4	484438	0.173309	0.996396	AANAT	DOX17againstowncontroln2	0	3	0	2	0.6
DOX17againstowncontroln2	ARL4D	3	132054	4	484438	0.173309	0.996396	ARL4D	DOX17againstowncontroln2	0	2	1	2	0.6
DOX17againstowncontroln2	BRMS1	3	132054	4	484438	0.173309	0.996396	BRMS1	DOX17againstowncontroln2	0	2	1	0	1
DOX17againstowncontroln2	C16orf57	3	132054	4	484438	0.173309	0.996396	C16orf57	DOX17againstowncontroln2	0	3	0	1	0.75
DOX17againstowncontroln2	C20orf20	3	132054	4	484438	0.173309	0.996396	C20orf20	DOX17againstowncontroln2	1	1	1	0	1
DOX17againstowncontroln2	CASP9	3	132054	4	484438	0.173309	0.996396	CASP9	DOX17againstowncontroln2	0	3	0	1	0.75
DOX17againstowncontroln2	CCBE1	3	132054	4	484438	0.173309	0.996396	CCBE1	DOX17againstowncontroln2	0	3	0	0	1
DOX17againstowncontroln2	CCDC42B	3	132054	4	484438	0.173309	0.996396	CCDC42B	DOX17againstowncontroln2	0	2	1	0	1
DOX17againstowncontroln2	CCDC79	3	132054	4	484438	0.173309	0.996396	CCDC79	DOX17againstowncontroln2	1	2	0	3	0.5
DOX17againstowncontroln2	CDC42EP5	3	132054	4	484438	0.173309	0.996396	CDC42EP5	DOX17againstowncontroln2	1	1	1	1	0.75
DOX17againstowncontroln2	CDRT4	3	132054	4	484438	0.173309	0.996396	CDRT4	DOX17againstowncontroln2	1	1	1	0	1
DOX17againstowncontroln2	COG6	3	132054	4	484438	0.173309	0.996396	COG6	DOX17againstowncontroln2	0	3	0	3	0.5
DOX17againstowncontroln2	CYP26A1	3	132054	4	484438	0.173309	0.996396	CYP26A1	DOX17againstowncontroln2	1	2	0	0	1
DOX17againstowncontroln2	DCDC2	3	132054	4	484438	0.173309	0.996396	DCDC2	DOX17againstowncontroln2	0	3	0	3	0.5
DOX17againstowncontroln2	DGAT1	3	132054	4	484438	0.173309	0.996396	DGAT1	DOX17againstowncontroln2	0	3	0	0	1
DOX17againstowncontroln2	EXOC7	3	132054	4	484438	0.173309	0.996396	EXOC7	DOX17againstowncontroln2	0	1	2	1	0.75
DOX17againstowncontroln2	FAR2	3	132054	4	484438	0.173309	0.996396	FAR2	DOX17againstowncontroln2	0	3	0	5	0.375
DOX17againstowncontroln2	FOXD1	3	132054	4	484438	0.173309	0.996396	FOXD1	DOX17againstowncontroln2	3	0	0	0	1
DOX17againstowncontroln2	FOXE1	3	132054	4	484438	0.173309	0.996396	FOXE1	DOX17againstowncontroln2	2	0	1	0	1
DOX17againstowncontroln2	GALE	3	132054	4	484438	0.173309	0.996396	GALE	DOX17againstowncontroln2	0	2	1	1	0.75
DOX17againstowncontroln2	H3F3B	3	132054	4	484438	0.173309	0.996396	H3F3B	DOX17againstowncontroln2	1	0	2	0	1
DOX17againstowncontroln2	HEBP1	3	132054	4	484438	0.173309	0.996396	HEBP1	DOX17againstowncontroln2	0	3	0	0	1
[truncated: 11,301 more rows]
